# Supplementary material for: Response of Gastric Epithelial Progenitors to Helicobacter pylori Isolates Obtained from Swedish Patients with Chronic Atrophic Gastritis
Source: PubMed Central journal article supplement — J Biol Chem. 2009 Sep 1;284(44):30383–94. doi: 10.1074/jbc.M109.052738 (PMC2781593; doi:10.1074/jbc.m109.052738), 2009-09-01
Supplement: supp_M109.052738_Suppdata.pdf [file supp_M109.052738_Suppdata.pdf]

## SUPPLEMENTARY INFORMATION

### SUPPLEMENTARY FIGURES

**Figure S1. Effect of assembly parameters on false positive SNP rate.** Bar graph is a histogram of coverage as reported by Velvet for assembled data from a single lane Illumina dataset for strain HPAG1. Contig coverage is plotted on the x-axis. The histogram is weighted by the length of each contig, so that the left black axis represents the total number of nucleotides (sum of contig lengths) in each coverage bin on the x-axis. The pink line and right pink axis plot the integral of the coverage histogram: this represents the sum of the contig lengths for all contigs with coverage less than a certain cutoff (the cumulative assembly). The blue line and right blue axis plot the integral of the number of false positive SNPs, which is known because the HPAG1 genome has been fully sequenced (finished): this represents the cumulative number of SNPs that are present in the assembly plotted by the pink line for each coverage cutoff on the x-axis.

**Figure S2. Growth of wild-type and isogenic  $\Delta hopZ$  strains *in vitro*.** Loss of HopZ does not produce a significant effect on growth in BHI broth at pH 7.0. (n=2 independent experiments)

**Figure S3. Flowchart for identifying acid-regulated *hopZ*-dependent transcriptional responses in *H. pylori* strain HPAG1.**

**Figure S4. Loss of HopZ does not block invasion of cultured mGEPs as judged by a multilabel immunohistochemical assay.** See *Experimental Procedures* for details about the assay.

## SUPPLEMENTARY TABLES AND LEGENDS

**Table S1. Assembly statistics for the 24 sequenced *H. pylori* genomes characterized in the present study.**

Abbreviations: nd, no data due to poor assembly; Variable OGUs, OGUs that are not represented in all sequenced *H. pylori* genomes.

**Table S2. SNPs identified from pairwise comparisons of *H. pylori* genomes.**

**Table S3. mGEP genes differentially expressed after infection by strains obtained from hosts with normal gastric histology (A), ChAG (B), or adenocarcinoma (C), compared to uninfected cells (fdr threshold 0.005).**

**Table S4. ChAG-associated signature response of mGEP cells: 695 transcripts that are differentially expressed upon infection with all 5 ChAG strains but not with the strain associated with normal gastric histology, or with heat-killed bacteria (fdr threshold 0.005).**

**Table S5. Shared ‘ChAG and cancer’ signature mGEP response.**

A subset of 434 of the 695 transcripts shown in Table S4 are also differentially expressed after infecting mGEPs with the cancer-associated *H. pylori* isolate.

**Table S6. IPA analysis of biological functions (A) and signaling/metabolic pathways (B) that were significantly over-represented in the 695-member ‘shared ChAG-signature’ mGEP response.**

**Table S7. IPA analysis of the biological functions (A) plus signaling and metabolic pathways (B) that were significantly over-represented in the 434-member ‘shared ChAG-cancer signature’ mGEP response.**

**Table S8. GeneChip based dataset of *H. pylori* HPAG1’s transcriptional responses to infection of mGEP cells (fdr threshold 0.05)**

**Table S9 – Genes in wild-type and isogenic  $\Delta$ hopZ strains whose expression *in vitro* is pH-dependent.**

**Table S10. *H. pylori* strain HPAG1 genes whose expression *in vitro* are pH- and hopZ-dependent.** Genes that are down- or up-regulated in the  $\Delta$ hopZ compared to wild-type strain at pH 7.0 versus pH 5.0 are shown.

**Table S11. PAML analysis of positive selection in *H. pylori* genes.**

Genes are divided into four categories: (i) those encoding specific outer membrane proteins of interest, (ii) housekeeping genes, (iii) known virulence factors, and (iv) randomly chosen HPAG1 genes. The trivial gene name, HPAG1 systematic gene name, and HPAG1 annotation are given. Genes that had evidence for recombination ( $p < 0.05$  according to GENECONV) were analyzed as fragments; resulting in multiple rows for several genes, which are shown in order from the 5' fragment to the 3' fragment. The amount of aligned sequence is shown for each ortholog set or fragment set. M1 lnL and M2 lnL are the logarithm (base e) of the likelihood reported by PAML for the respective evolutionary model. LRT is the likelihood ratio test p-value, indicating the amount of statistical support for rejecting the null hypothesis (of no positive selection).  $w$  is the dn/ds value and  $p$  is the proportion of codons under positive selection for those genes that had significant evidence of positive selection. Genes with significant evidence of positive selection are highlighted in bold type.

Giannakis *et al.*, Supplemental Figure 1

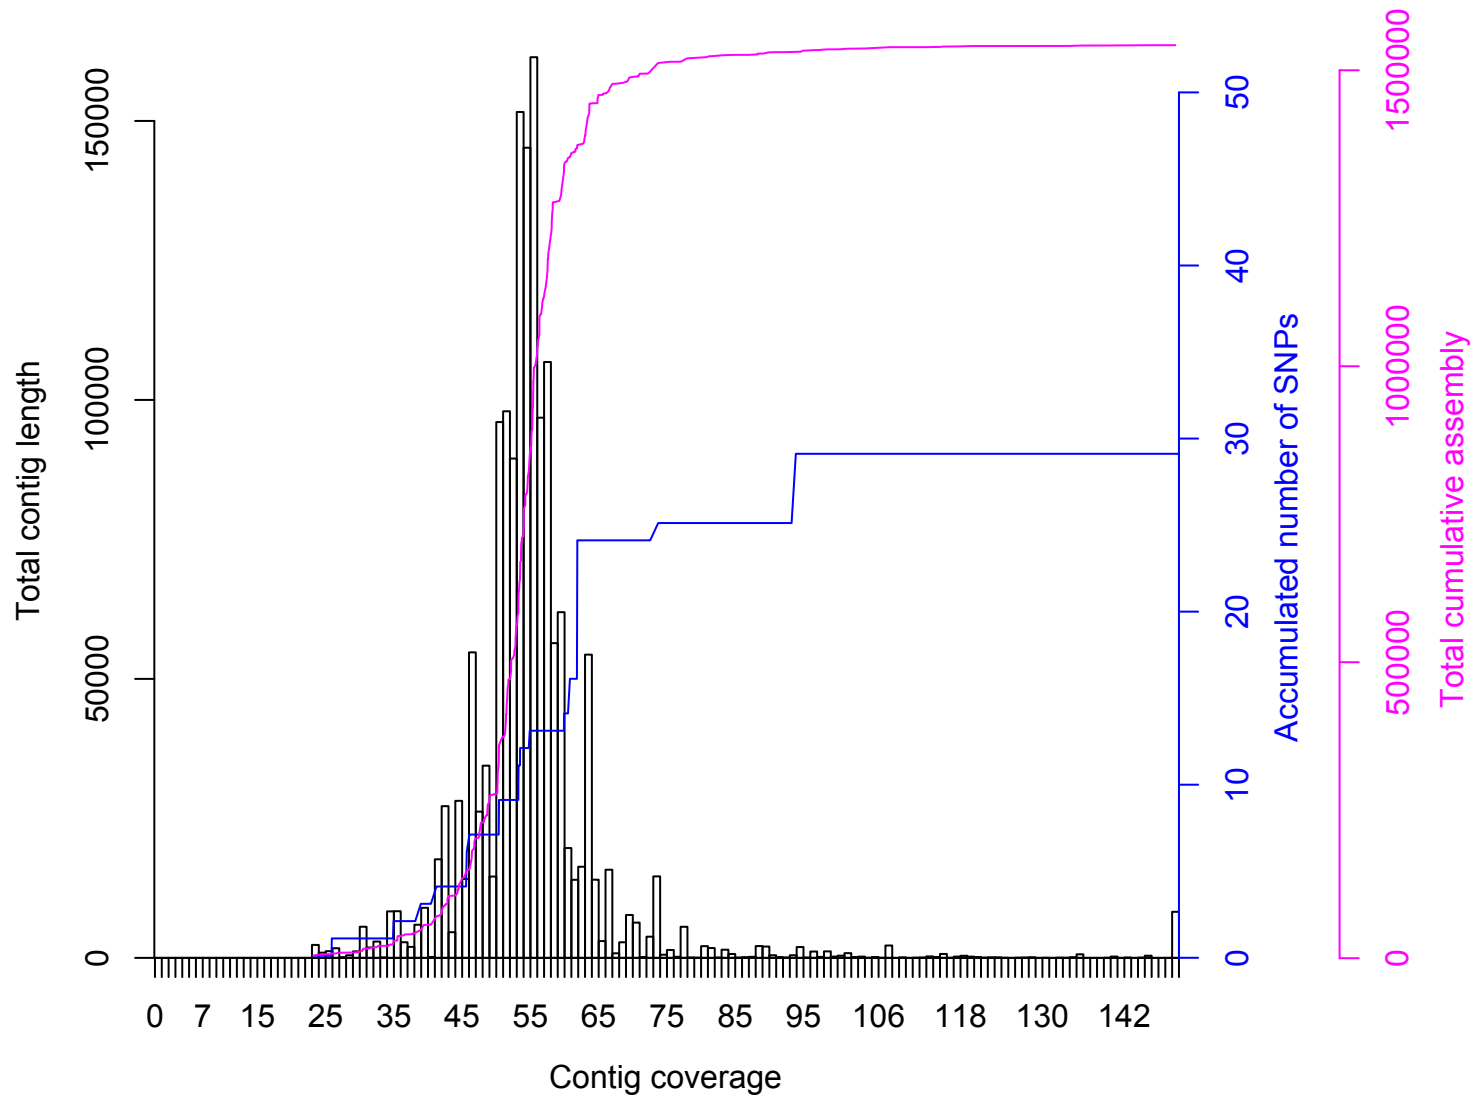

Giannakis *et al.*. Supplemental Figure 2

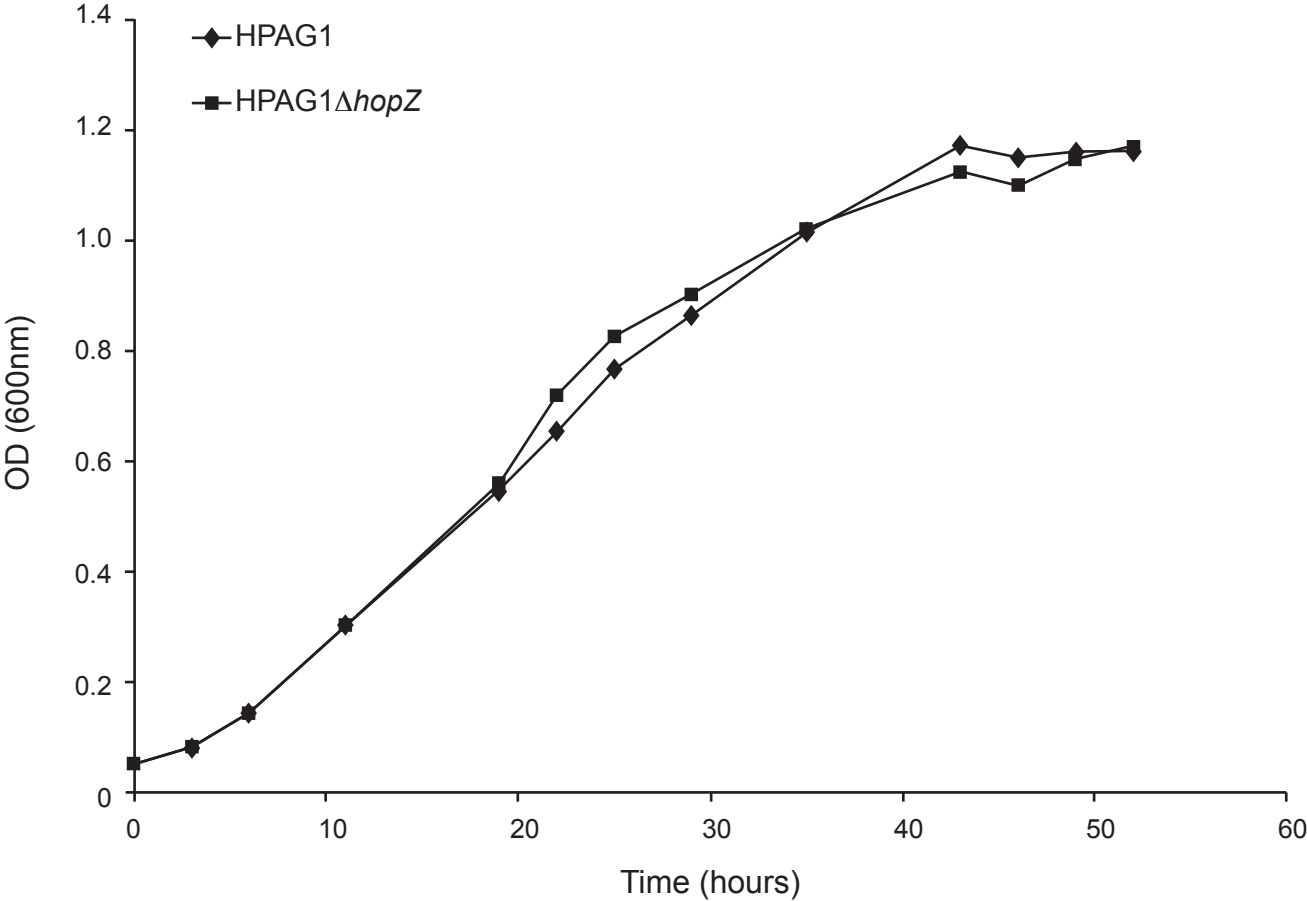

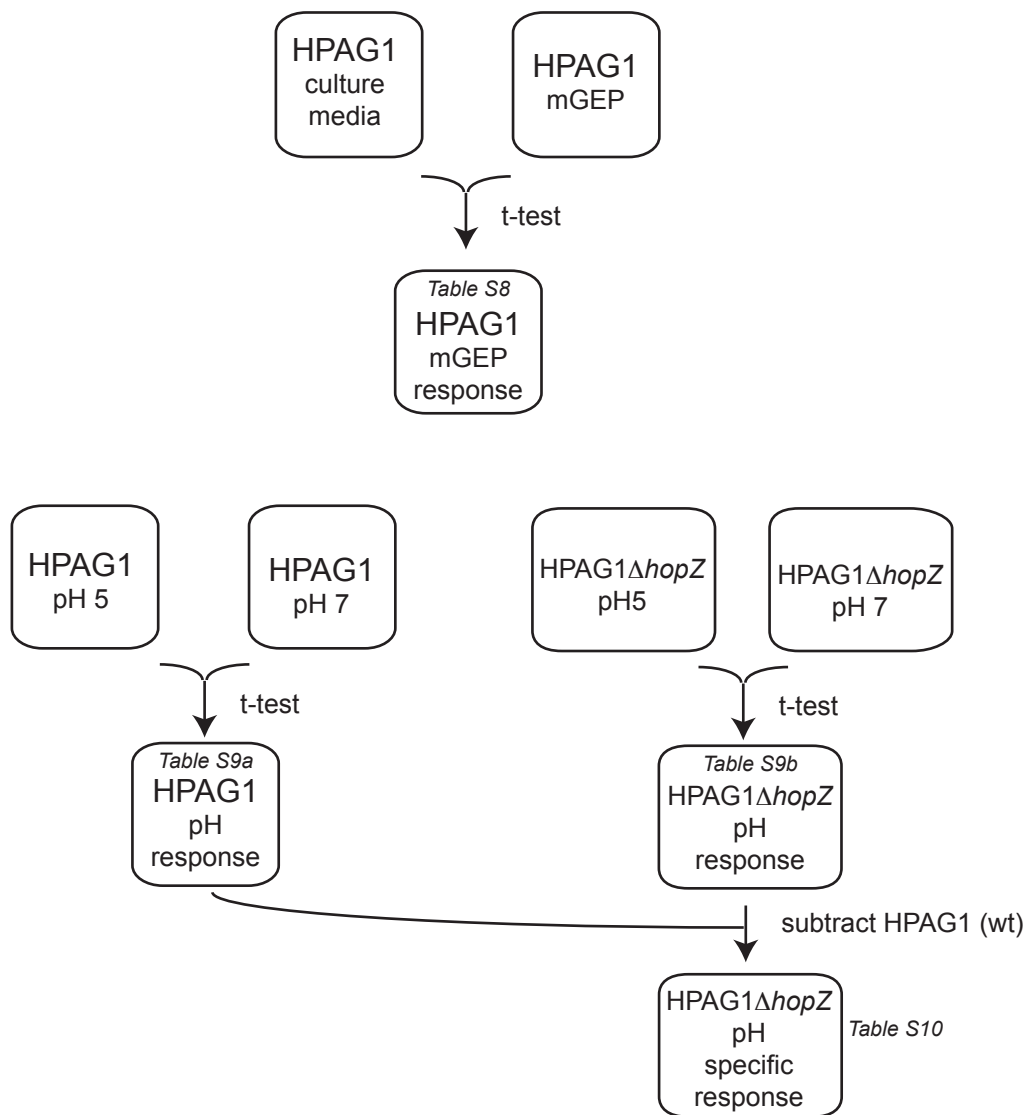

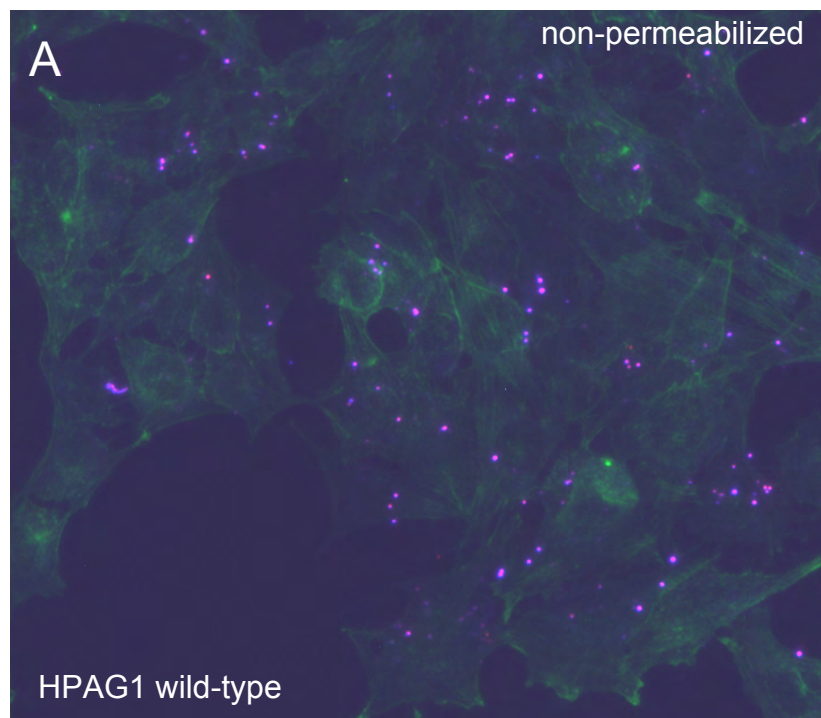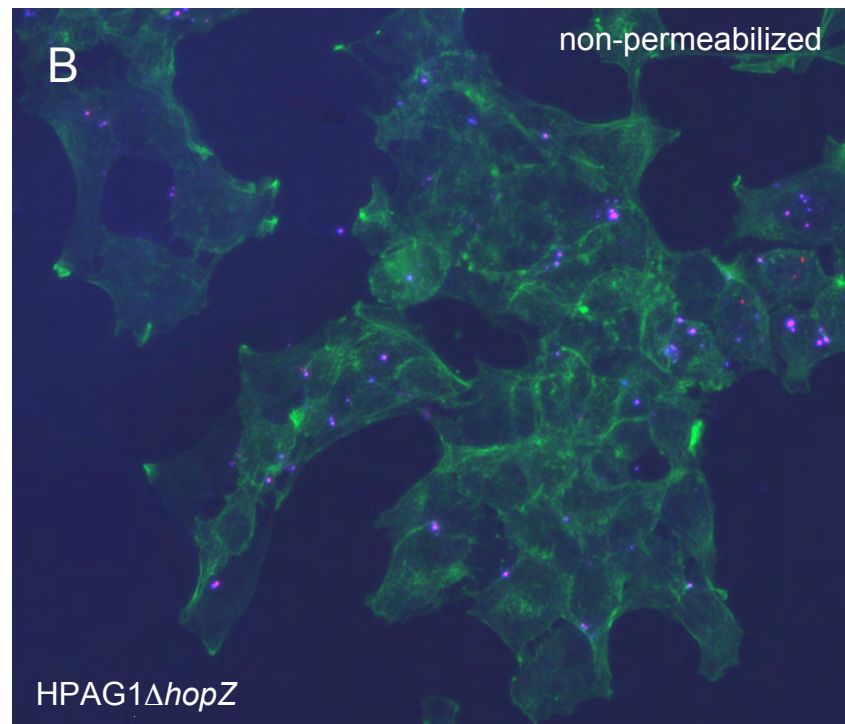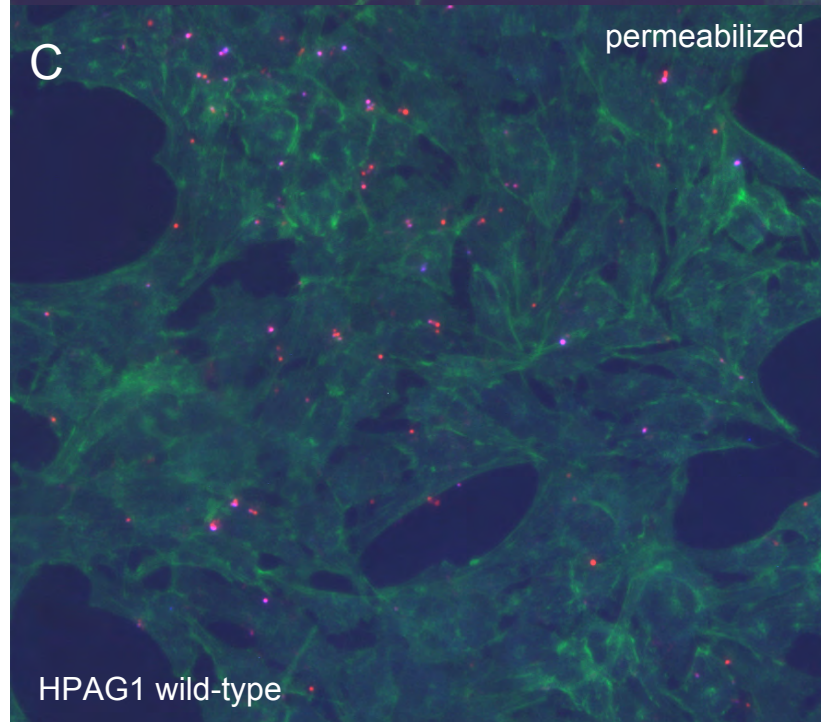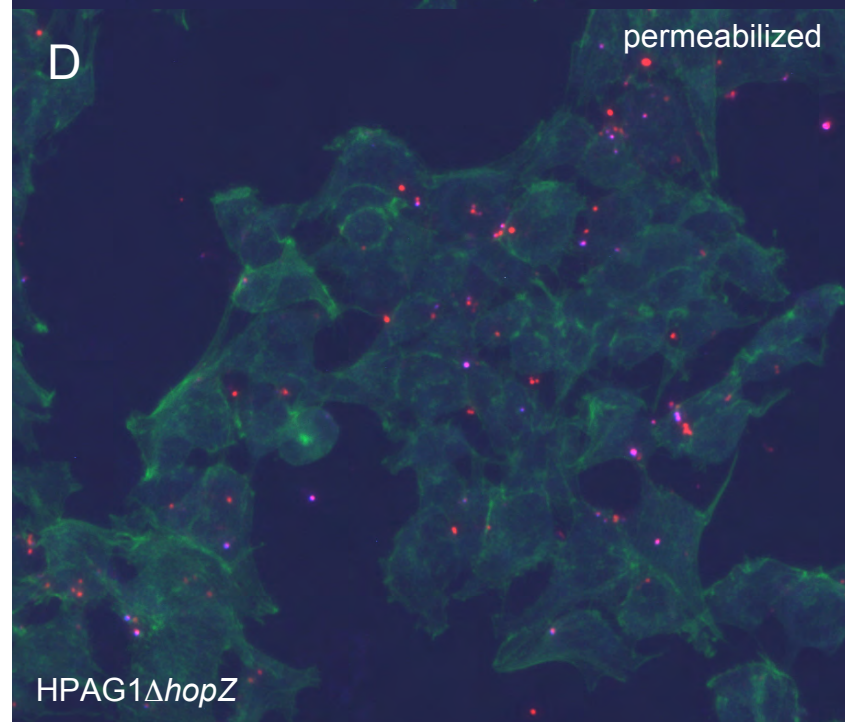

**Table S1. Assembly statistics for the 24 sequenced *H. pylori* genomes characterized in the present study.**

| Strain Name     | Patient | Time-point (year) | Histology | # reads | Est. Coverage | Assembly length | N50 length | Raw Reads  |               | Assembled data |                    |
|-----------------|---------|-------------------|-----------|---------|---------------|-----------------|------------|------------|---------------|----------------|--------------------|
|                 |         |                   |           |         |               |                 |            | Total OGUs | Variable OGUs | Total OGUs     | Total OGUs > 300bp |
| HPKX_1259_NL0C1 | 1259    | 0                 | NL        | 4236655 | 102           | 1564210         | 1622       | 1714       | 641           | 1524           | 937                |
| HPKX_1259_NL0C2 | 1259    | 0                 | NL        | 2986898 | 72            | 1559448         | 11755      | 1535       | 462           | 1511           | 1093               |
| HPKX_1259_NL4C1 | 1259    | 4                 | NL        | 6445761 | 155           | 1565228         | 18624      | 1542       | 469           | 1592           | 1306               |
| HPKX_1259_NL4C2 | 1259    | 4                 | NL        | 4815651 | 116           | 1578086         | 11202      | 1484       | 411           | 1091           | 1046               |
| HPKX_1379_NL0C1 | 1379    | 0                 | NL        | 6181034 | 148           | 1591441         | 16319      | 1600       | 527           | 1560           | 1315               |
| HPKX_1379_NL0C2 | 1379    | 0                 | NL        | 3658442 | 88            | 1593778         | 11397      | 1556       | 483           | 1556           | 1302               |
| HPKX_1379_NL4C1 | 1379    | 4                 | NL        | 5052351 | 121           | 1592699         | 15256      | 1670       | 597           | 1585           | 1320               |
| HPKX_1379_NL4C2 | 1379    | 4                 | NL        | 4378437 | 105           | 1577073         | 15720      | 1539       | 466           | 1551           | 1310               |
| HPKX_345_NL0C1  | 345     | 0                 | NL        | 5782741 | 139           | 1600564         | 16123      | 1618       | 545           | 1590           | 1330               |
| HPKX_345_NL0C2  | 345     | 0                 | NL        | 7697166 | 185           | 1593064         | 13524      | 1483       | 410           | 1571           | 1318               |
| HPKX_345_AG4C1  | 345     | 4                 | ChAG      | 4543126 | 109           | 1610411         | 21425      | 1656       | 583           | 1626           | 1326               |
| HPKX_345_AG4C2  | 345     | 4                 | ChAG      | 5552941 | 133           | na              | na         | 1288       | 215           | na             | na                 |
| HPKX_1039_AG0C1 | 1039    | 0                 | ChAG      | 6470769 | 155           | 1626929         | 20236      | 1673       | 600           | 1619           | 1355               |
| HPKX_1039_AG0C2 | 1039    | 0                 | ChAG      | 4017530 | 96            | 1620862         | 9423       | 1563       | 490           | 1640           | 1328               |
| HPKX_1039_AG4C1 | 1039    | 4                 | ChAG      | 6016174 | 144           | 1634524         | 17093      | 1647       | 574           | 1625           | 1357               |
| HPKX_1039_AG4C2 | 1039    | 4                 | ChAG      | 4268333 | 102           | 1630496         | 12056      | 1553       | 480           | 1613           | 1334               |
| HPKX_1172_AG0C1 | 1172    | 0                 | ChAG      | 6345857 | 152           | 1540507         | 15527      | 1518       | 445           | 1571           | 1262               |
| HPKX_1172_AG0C2 | 1172    | 0                 | ChAG      | 5298755 | 127           | 1543511         | 2661       | 1334       | 261           | 1376           | 1013               |
| HPKX_1172_AG4C1 | 1172    | 4                 | ChAG      | 6511354 | 156           | 1571948         | 9160       | 1440       | 367           | 1461           | 1092               |
| HPKX_1172_AG4C2 | 1172    | 4                 | ChAG      | 4581562 | 110           | 1552345         | 15013      | 1474       | 401           | 1540           | 1286               |
| HPKX_438_AG0C1  | 438     | 0                 | ChAG      | 5861462 | 141           | 1586508         | 5801       | 1708       | 635           | 1589           | 1327               |
| HPKX_438_AG0C2  | 438     | 0                 | ChAG      | 3816020 | 92            | 1579980         | 8847       | 1572       | 499           | 1602           | 1287               |
| HPKX_438_CA4C1  | 438     | 4                 | CA        | 6040342 | 145           | 1588991         | 6013       | 1639       | 566           | 1584           | 1326               |
| HPKX_438_CA4C2  | 438     | 4                 | CA        | 2845094 | 68            | 1580313         | 7976       | 1568       | 495           | 1563           | 1289               |

Abbreviations: na, no data due to poor assembly; Variable OGUs, OGUs that are not represented in all sequenced *H. pylori* genomes.



Table S2. SNPs identified from pairwise comparisons of *H. pylori* genomes.

|                 | HPKX_1259_NL0C1 | HPKX_1259_NL0C2 | HPKX_1259_NL4C1 | HPKX_1259_NL4C2 | HPKX_1379_NL0C1 | HPKX_1379_NL0C2 | HPKX_1379_NL4C1 | HPKX_1379_NL4C2 | HPKX_345_NL0C1 | HPKX_345_NL0C2 | HPKX_345_AG4C1 | HPKX_1039_AG0C1 | HPKX_1039_AG0C2 |
|-----------------|-----------------|-----------------|-----------------|-----------------|-----------------|-----------------|-----------------|-----------------|----------------|----------------|----------------|-----------------|-----------------|
| HPKX_1259_NL0C1 | 0/953650        | 521/805379      | 584/690655      | 660/810752      | 25809/708989    | 28713/779082    | 27661/749837    | 26214/714918    | 25370/712103   | 26181/741020   | 23579/659660   | 22200/648711    | 27310/814614    |
| HPKX_1259_NL0C2 | 521/805379      | 0/115111        | 429/932013      | 263/1117539     | 32473/903422    | 35190/670192    | 34750/955745    | 33381/919274    | 30624/878458   | 33818/825980   | 28400/814327   | 28725/854382    | 34216/1036240   |
| HPKX_1259_NL4C1 | 584/690655      | 429/932013      | 0/1008177       | 290/945420      | 29758/814463    | 31498/856595    | 30724/828992    | 29634/803920    | 28336/805087   | 28943/825980   | 26654/758701   | 26089/770140    | 30243/901582    |
| HPKX_1259_NL4C2 | 660/810752      | 263/1117539     | 290/945420      | 0/1177053       | 33456/927381    | 36184/997621    | 35429/972764    | 34394/947179    | 31200/892667   | 32765/944583   | 28698/820987   | 29389/873370    | 34952/1054469   |
| HPKX_1379_NL0C1 | 25809/708989    | 32473/903422    | 29758/814463    | 33456/927381    | 0/1094830       | 195/1009944     | 753/1023580     | 179/997736      | 31175/867461   | 32240/893285   | 29001/801094   | 26367/778629    | 31425/932254    |
| HPKX_1379_NL0C2 | 28713/779082    | 35190/670192    | 31498/856595    | 36184/997621    | 195/1009944     | 0/1183314       | 817/1049524     | 205/1061594     | 33048/912235   | 33993/942071   | 30291/832383   | 27795/813529    | 33892/1002028   |
| HPKX_1379_NL4C1 | 27661/749837    | 34750/955745    | 30724/828992    | 35429/972764    | 753/1023580     | 817/1049524     | 0/1131673       | 763/1044036     | 32696/898426   | 33913/934403   | 30373/829278   | 27367/799643    | 32709/962817    |
| HPKX_1379_NL4C2 | 26214/714918    | 33381/919274    | 29634/803920    | 34394/947179    | 179/997736      | 205/1061594     | 763/1044036     | 0/1099250       | 31790/877678   | 32749/909870   | 29567/808420   | 27057/786714    | 31651/933971    |
| HPKX_345_NL0C1  | 25370/712103    | 30624/878458    | 28336/805087    | 31200/892667    | 31175/867461    | 33048/912235    | 32696/898426    | 31790/877678    | 0/1064024      | 555/1038188    | 546/953755     | 29373/825960    | 32420/914549    |
| HPKX_345_NL0C2  | 26181/741020    | 32272/932090    | 28943/825980    | 32765/944583    | 32240/893285    | 33993/942071    | 33913/934403    | 32749/909870    | 555/1038188    | 0/1191979      | 132/951376     | 30270/846399    | 34328/969059    |
| HPKX_345_AG4C1  | 23579/659660    | 28400/814327    | 26654/758701    | 26654/758701    | 26698/820987    | 29001/801094    | 30291/832383    | 29567/808420    | 546/953755     | 132/951376     | 0/978059       | 27465/767679    | 29488/830165    |
| HPKX_1039_AG0C1 | 22200/648711    | 28725/854382    | 26089/770140    | 29389/873370    | 26367/778629    | 27795/813529    | 27367/799643    | 27057/786714    | 29373/825960   | 30270/846399   | 27465/767679   | 0/973422        | 186/933240      |
| HPKX_1039_AG0C2 | 27310/814614    | 34216/1036240   | 30243/901582    | 34952/1054469   | 31425/932254    | 33892/1002028   | 32709/962817    | 31651/933971    | 34328/969059   | 29488/830165   | 27465/767679   | 186/933240      | 0/1201463       |
| HPKX_1039_AG4C1 | 22414/657987    | 29222/871550    | 26853/792765    | 29701/885529    | 26754/793475    | 27906/830036    | 28201/832123    | 27159/803482    | 28827/807236   | 30662/859460   | 27840/774533   | 2681/891680     | 2792/946472     |
| HPKX_1039_AG4C2 | 26312/775893    | 33478/999242    | 30109/891031    | 34101/1012521   | 30302/910078    | 32400/873254    | 31904/949635    | 30856/922495    | 33057/927421   | 34891/979463   | 30299/843551   | 3068/937558     | 3529/1066647    |
| HPKX_1172_AG0C1 | 23709/714191    | 30609/942843    | 27752/842577    | 31690/972019    | 32516/896668    | 34243/938489    | 33664/921298    | 33260/916397    | 31668/903491   | 33443/958277   | 29189/829214   | 28614/843064    | 32276/963382    |
| HPKX_1172_AG0C2 | 26214/786862    | 31151/958590    | 27391/834823    | 31962/982931    | 31889/887346    | 34916/964630    | 33404/921331    | 32304/895474    | 30627/876444   | 32069/923425   | 28010/798148   | 27123/796385    | 33653/997431    |
| HPKX_1172_AG4C1 | 28416/809175    | 34894/1014911   | 30080/872094    | 35300/1029936   | 35061/947924    | 37269/1004400   | 36259/972470    | 35320/954941    | 33302/940909   | 35344/1003155  | 30777/868518   | 30705/869400    | 36407/1038758   |
| HPKX_1172_AG4C2 | 26061/773134    | 32835/1001715   | 30043/897745    | 33598/1023708   | 34069/941837    | 36612/1001944   | 35836/980922    | 35035/964105    | 33163/942615   | 34956/998868   | 30287/858771   | 30454/887183    | 35434/1040805   |
| HPKX_438_AG0C1  | 25414/712411    | 31354/893735    | 28097/795300    | 31611/901843    | 30548/860004    | 32302/904345    | 31762/885830    | 30613/857288    | 29692/899051   | 30759/930565   | 28082/847502   | 29127/799601    | 33185/921242    |
| HPKX_438_AG0C2  | 28552/804300    | 35277/1012592   | 31185/887931    | 36527/1044157   | 34660/963852    | 37639/1042378   | 35664/988245    | 35287/980041    | 31758/961147   | 33267/1013884  | 29119/884608   | 31230/861543    | 38114/1062284   |
| HPKX_438_CA4C1  | 24000/678697    | 29753/856744    | 27106/773096    | 29953/863509    | 29195/828550    | 30277/855474    | 30461/857269    | 29281/822995    | 28093/860123   | 29056/886846   | 26426/803362   | 27048/753505    | 31004/871524    |
| HPKX_438_CA4C2  | 29341/822010    | 35773/1025679   | 31267/890214    | 36829/1051931   | 34102/959512    | 37187/1032475   | 35714/994812    | 34850/972846    | 32031/964891   | 33431/1012644  | 29286/884110   | 31588/869245    | 38113/1063904   |
| HPA61           | 36117/945482    | 42912/1141839   | 38090/994421    | 43998/1167570   | 41647/1079249   | 45624/1173583   | 43601/1119490   | 42087/1087648   | 40490/1059777  | 42447/1110803  | 37267/969396   | 37348/967286    | 45354/1191406   |
| HP26695         | 22663/602556    | 29351/801232    | 26648/718634    | 29353/803539    | 28880/758288    | 29599/776320    | 28965/759340    | 26246/744927    | 27625/749079   | 28682/776364   | 26092/701574   | 26454/709875    | 28879/779121    |
| HPJ99           | 32742/610030    | 41040/776975    | 37711/711027    | 42338/802308    | 40385/774094    | 42238/812101    | 41601/792361    | 40584/777188    | 39036/747130   | 40546/771876   | 36058/686889   | 37490/689049    | 42651/794695    |
| HPG27           | 25658/636130    | 31961/817810    | 29042/734674    | 32487/830091    | 30317/774798    | 32686/833330    | 31437/800146    | 31280/798631    | 30493/772990   | 31923/811080   | 28278/717081   | 26703/675923    | 31372/800428    |
| HPSh470         | 25484/595613    | 31950/758677    | 29173/685172    | 32687/777236    | 31468/709019    | 33493/761647    | 32129/723049    | 31506/714689    | 31246/725750   | 32278/746500   | 29048/668838   | 30006/714695    | 33100/789117    |
| HP12            | 24297/611930    | 30723/783165    | 28055/708094    | 30683/785583    | 29410/754690    | 31254/798674    | 29909/761491    | 30370/774960    | 29442/760334   | 30278/781144   | 26988/691923   | 28181/710312    | 31211/794251    |

Numbers shown are: total number of SNPs/aligned length of genomes

| HPKX_1039_AG4C1 | HPKX_1039_AG4C2 | HPKX_1172_AG0C1 | HPKX_1172_AG0C2 | HPKX_1172_AG4C1 | HPKX_1172_AG4C2 | HPKX_438_AG0C1 | HPKX_438_AG0C2 | HPKX_438_CA4C1 | HPKX_438_CA4C2 | HPAG1         | HP26895       | HPJ99         | HPG27         | HPSh470      | HPP12        |
|-----------------|-----------------|-----------------|-----------------|-----------------|-----------------|----------------|----------------|----------------|----------------|---------------|---------------|---------------|---------------|--------------|--------------|
| 22414657987     | 26312/775893    | 23709714191     | 26214/786862    | 28416/809175    | 26061/773134    | 25414/712411   | 28552/804300   | 24000/678697   | 29341/822010   | 36117/945482  | 22663/602556  | 32742/610030  | 25658/636130  | 25484/595613 | 24297/611930 |
| 29222/871550    | 33478/999242    | 30609/942843    | 31151/958590    | 34894/1014911   | 32835/1001715   | 31354/893735   | 35277/1012592  | 29753/856744   | 35773/1025679  | 42912/1141839 | 29351/801232  | 41040/776975  | 31961/818710  | 31950/758677 | 30723/783165 |
| 26853/792765    | 30109/891031    | 27752/842577    | 27391/834823    | 30080/872094    | 30043/897745    | 28097/795300   | 31185/887931   | 27106/773096   | 31267/890214   | 38090/994421  | 26648/718634  | 37711/711027  | 29042/734674  | 29173/685172 | 28055/708094 |
| 29701/885529    | 34101/11012521  | 31690/972019    | 31962/982931    | 35300/1029936   | 33598/1023708   | 31611/901843   | 36527/1044157  | 29953/863509   | 36829/1051931  | 43998/1167570 | 29353/803539  | 42338/802308  | 32487/830091  | 32687/777236 | 30683/785583 |
| 26754/793475    | 30302/910078    | 32516/896668    | 31889/887346    | 35061/947924    | 34069/941837    | 30548/860004   | 34660/963852   | 29195/828550   | 34102/959512   | 41647/1079249 | 28880/758288  | 40385/774094  | 30317/747798  | 31468/709019 | 29410/754690 |
| 27906/830036    | 32400/973254    | 34243/938489    | 34916/964630    | 37269/1004400   | 36612/1001944   | 32302/904345   | 37639/1042378  | 30277/855474   | 37187/1032475  | 45624/1173583 | 29599/776320  | 42238/812101  | 32686/833330  | 33493/761647 | 31254/798674 |
| 28201/832123    | 31904/949635    | 33664/921298    | 33404/921331    | 36259/972470    | 35836/980922    | 31762/885830   | 35664/988245   | 30461/857269   | 35714/994812   | 43601/1119490 | 28965/759340  | 41601/792361  | 31437/800146  | 32129/723049 | 29909/761491 |
| 27159/803482    | 30856/922495    | 33260/916397    | 32304/895474    | 35320/954941    | 35035/964105    | 30613/857288   | 35287/980041   | 29281/829995   | 34850/972846   | 42087/1087648 | 28246/744927  | 40584/777188  | 31280/798631  | 31506/714689 | 30370/774960 |
| 28827/807236    | 33057/927421    | 31666/903491    | 30627/876444    | 33302/940909    | 31363/942615    | 29692/899051   | 31758/961147   | 28093/860123   | 32031/964891   | 40490/1057977 | 27625/749079  | 39036/747130  | 30493/772980  | 31246/725750 | 29442/760334 |
| 30662/859460    | 34891/879463    | 33443/958277    | 32069/923425    | 35344/1003155   | 34956/998868    | 30759/930565   | 33267/1013884  | 29056/888648   | 33431/11012644 | 42447/1110803 | 28682/776364  | 40546/771876  | 31923/811080  | 32278/746500 | 30278/781144 |
| 27840/774533    | 30299/843551    | 29189/829214    | 28010/798148    | 30777/868518    | 30287/858771    | 28082/847502   | 29119/884608   | 26426/803362   | 29286/884110   | 37267/969396  | 26092/701574  | 36058/686889  | 28278/717081  | 29048/688838 | 26988/691923 |
| 2681/891680     | 3068/937558     | 28614/843064    | 27123/798385    | 30705/869400    | 30454/887183    | 29127/799601   | 31230/861543   | 27048/753505   | 31588/869245   | 37348/967286  | 26454/709875  | 37490/689049  | 26703/675923  | 30006/714695 | 28181/710312 |
| 2792/946472     | 3529/1096647    | 32276/963382    | 33653/997431    | 36407/1038758   | 35434/1040805   | 33185/921242   | 38114/1062284  | 31004/871524   | 38113/1063904  | 45354/1191406 | 28879/779121  | 42651/794695  | 31372/800428  | 33100/789117 | 31211/794251 |
| 0/991964        | 152/968394      | 29473/864708    | 27497/812721    | 31169/880169    | 30860/899134    | 29617/813800   | 31520/872366   | 27227/756834   | 31617/875107   | 37592/979310  | 27058/729724  | 37964/695229  | 27612/698758  | 29896/702329 | 26880/676006 |
| 152/968394      | 0/1158607       | 32663/962006    | 32569/962687    | 35355/1004466   | 35112/1026540   | 33297/917695   | 37126/1021267  | 31092/869778   | 37460/1027541  | 43778/1144215 | 28441/769546  | 42534/790782  | 31420/98626   | 33119/775580 | 31583/802671 |
| 29473/864708    | 32663/962006    | 0/1099476       | 5383/925202     | 19547/994983    | 17280/1003592   | 0/1164885      | 17280/1003592  | 768/990128     | 30354/863451   | 35337/1002516 | 28516/820288  | 36313/1028456 | 43133/1150964 | 27510/742429 | 39238/747325 |
| 27497/812721    | 32569/962687    | 5383/925202     | 0/1164885       | 19547/994983    | 17280/1003592   | 0/1217716      | 18404/1054638  | 32958/914151   | 38402/1063097  | 30793/868062  | 38512/1072101 | 46546/1210075 | 30334/804816  | 42136/807188 | 30697/798097 |
| 31169/880169    | 35355/1004466   | 19547/994983    | 17280/1003592   | 0/1217716       | 18404/1054638   | 0/1183279      | 32967/921158   | 37318/1047580  | 31629/897784   | 36990/1043277 | 44690/1170290 | 30396/807906  | 42236/790326  | 32641/831596 | 32920/770978 |
| 30860/899134    | 35112/1026540   | 5999/1068105    | 768/990128      | 18404/1054638   | 0/1183279       | 32967/921158   | 0/1056609      | 264/972471     | 85/962004      | 358/987227    | 39655/1045775 | 27209/733558  | 36657/704140  | 30600/807091 | 31066/709180 |
| 29617/813800    | 33297/917695    | 31338/874796    | 30354/863451    | 32958/914151    | 32967/921158    | 0/1056609      | 264/972471     | 85/962004      | 358/987227     | 39655/1045775 | 27209/733558  | 36657/704140  | 30600/807091  | 31066/709180 | 29215/748475 |
| 31520/872366    | 37126/1021267   | 35196/988395    | 35337/1002516   | 38402/1063097   | 37318/1047580   | 264/972471     | 0/1212603      | 243/938312     | 211/1135614    | 45960/1207132 | 29237/789682  | 42548/816912  | 32268/828836  | 35286/805614 | 31376/803341 |
| 27227/756834    | 31092/869778    | 30102/853567    | 30102/853567    | 30793/868062    | 31629/897784    | 85/962004      | 243/938312     | 0/1004852      | 295/943139     | 0/1225678     | 45994/1219347 | 0/1508016     | 34588/893551  | 47006/891940 | 31039/737699 |
| 31617/875107    | 37460/1027541   | 34733/981479    | 36313/1028456   | 38512/1072101   | 36990/1043277   | 211/1135614    | 295/943139     | 0/1225678      | 45994/1219347  | 0/1508016     | 34588/893551  | 47006/891940  | 31039/737699  | 30311/696693 | 28826/745173 |
| 37592/979310    | 43778/1144215   | 41408/1085044   | 43133/1150964   | 46546/1210075   | 44690/1170290   | 39655/1045775  | 45960/1207132  | 37235/994828   | 45994/1219347  | 0/1508016     | 34588/893551  | 47006/891940  | 31039/737699  | 30311/696693 | 28826/745173 |
| 27058/729724    | 28441/769546    | 28995/781248    | 27510/742429    | 30334/804816    | 30396/807906    | 27209/733558   | 29237/789682   | 26810/730360   | 29131/794026   | 34588/893551  | 0/903139      | 33905/672396  | 27740/728296  | 29035/647567 | 26199/681952 |
| 37964/695229    | 42534/790782    | 41502/777170    | 39238/747325    | 42136/807188    | 42236/790326    | 36657/704140   | 42548/816912   | 36844/706514   | 41892/807442   | 47006/891940  | 33905/672396  | 0/905193      | 33138/658734  | 39077/664750 | 34945/690472 |
| 27612/698758    | 31420/798626    | 31476/802128    | 30254/776108    | 30697/798097    | 32641/831596    | 30600/807091   | 32268/828836   | 30039/737699   | 32847/841796   | 37657/933599  | 27740/728296  | 33138/658734  | 0/945802      | 30462/641176 | 28023/733911 |
| 29896/702329    | 33119/775850    | 32354/762597    | 30219/729287    | 33917/775406    | 32920/770978    | 31066/709180   | 35286/805614   | 30311/696693   | 33887/784370   | 41058/884118  | 29035/647567  | 39077/664750  | 30462/641176  | 0/897104     | 30499/653432 |
| 26880/676006    | 31583/802671    | 29350/758280    | 28264/741503    | 30832/790234    | 31464/811179    | 29215/748475   | 31376/803341   | 28826/745173   | 31459/810680   | 35045/891981  | 26199/681952  | 34945/690472  | 28023/733911  | 30499/653432 | 0/903217     |

**Table S3. mGEP genes differentially expressed after infection by strains obtained from hosts with normal gastric histology (A), ChAG (B), or adenocarcinoma (C), compared to uninfected cells. (fdr threshold 0.005)**

**Table S3A.**

| Moe430_2<br>GeneChip<br>probeset | fold-change | gene symbol             | gene description                                                                                                                                                                                         |
|----------------------------------|-------------|-------------------------|----------------------------------------------------------------------------------------------------------------------------------------------------------------------------------------------------------|
| 1419529_at                       | 14.6        | Il23a                   | interleukin 23, alpha subunit p19<br>chemokine (C-X-C motif) ligand 10 /// similar to Small inducible cytokine B10 precursor (CXCL10) (Interferon-gamma-induced protein CRG-2) (Gamma-IP10) (IP-10) (C7) |
| 1418930_at                       | 13.9        | Cxcl10 /// LOC100045000 | chemokine (C-X-C motif) ligand 10 /// similar to Small inducible cytokine B10 precursor (CXCL10) (Interferon-gamma-induced protein CRG-2) (Gamma-IP10) (IP-10) (C7)                                      |
| 1420991_at                       | 10.1        | Ankrd1                  | ankyrin repeat domain 1 (cardiac muscle)                                                                                                                                                                 |
| 1415989_at                       | 9.7         | Vcam1                   | vascular cell adhesion molecule 1                                                                                                                                                                        |
| 1450971_at                       | 9.4         | Gadd45b                 | growth arrest and DNA-damage-inducible 45 beta                                                                                                                                                           |
| 1425519_a_at                     | 8.9         | Cd74                    | CD74 antigen (invariant polypeptide of major histocompatibility complex, class II antigen-associated)                                                                                                    |
| 1455197_at                       | 8.7         | Rnd1                    | Rho family GTPase 1                                                                                                                                                                                      |
| 1449773_s_at                     | 8.4         | Gadd45b                 | growth arrest and DNA-damage-inducible 45 beta                                                                                                                                                           |
| 1450295_s_at                     | 8.3         | Pvr                     | poliovirus receptor                                                                                                                                                                                      |
| 1424735_at                       | 8.1         | Slc25a25                | solute carrier family 25 (mitochondrial carrier, phosphate carrier), member 25                                                                                                                           |
| 1450829_at                       | 8.0         | Tnfrsf3                 | tumor necrosis factor, alpha-induced protein 3                                                                                                                                                           |
| 1416691_at                       | 7.9         | Gtpbp2                  | GTP binding protein 2                                                                                                                                                                                    |
| 1426063_a_at                     | 7.6         | Gem                     | GTP binding protein (gene overexpressed in skeletal muscle)                                                                                                                                              |
| 1425155_x_at                     | 7.2         | Csf1                    | colony stimulating factor 1 (macrophage)                                                                                                                                                                 |
| 1420992_at                       | 6.5         | Ankrd1                  | ankyrin repeat domain 1 (cardiac muscle)                                                                                                                                                                 |
| 1450977_s_at                     | 6.3         | Ndrp1                   | N-myc downstream regulated gene 1                                                                                                                                                                        |
| 1450199_a_at                     | 5.9         | Stab1                   | stabilin 1                                                                                                                                                                                               |
| 1434574_at                       | 5.8         | 9430008C03Rik           | RIKEN cDNA 9430008C03 gene                                                                                                                                                                               |
| 1424067_at                       | 5.7         | Icam1                   | intercellular adhesion molecule 1                                                                                                                                                                        |
| 1422018_at                       | 5.6         | Hivep2                  | human immunodeficiency virus type I enhancer binding protein 2                                                                                                                                           |
| 1450173_at                       | 5.6         | Ripk2                   | receptor (TNFRSF)-interacting serine-threonine kinase 2                                                                                                                                                  |
| 1418280_at                       | 5.6         | Klf6                    | Kruppel-like factor 6                                                                                                                                                                                    |
| 1444302_at                       | 5.5         | Glt8d4 /// LOC100048436 | glycosyltransferase 8 domain containing 4 /// similar to CDNA sequence BC049816                                                                                                                          |
| 1453589_a_at                     | 5.4         | 6820431F20Rik           | RIKEN cDNA 6820431F20 gene                                                                                                                                                                               |
| 1427646_a_at                     | 5.4         | Arhgef2                 | rho/rac guanine nucleotide exchange factor (GEF) 2                                                                                                                                                       |
| 1448306_at                       | 5.3         | Nfkbia                  | nuclear factor of kappa light polypeptide gene enhancer in B-cells inhibitor, alpha                                                                                                                      |
| 1449731_s_at                     | 5.2         | Nfkbia                  | nuclear factor of kappa light polypeptide gene enhancer in B-cells inhibitor, alpha                                                                                                                      |
| 1435595_at                       | 5.2         | 1810011O10Rik           | RIKEN cDNA 1810011O10 gene                                                                                                                                                                               |
| 1460722_at                       | 4.8         | Soat2                   | sterol O-acyltransferase 2                                                                                                                                                                               |
| 1448886_at                       | 4.8         | Gata3                   | GATA binding protein 3                                                                                                                                                                                   |
| 1453345_at                       | 4.8         | Npal1                   | NIPA-like domain containing 1                                                                                                                                                                            |
| 1416273_at                       | 4.8         | Tnfrsf2                 | tumor necrosis factor, alpha-induced protein 2                                                                                                                                                           |
| 1425106_a_at                     | 4.7         | Wars                    | tryptophanyl-tRNA synthetase                                                                                                                                                                             |
| 1450957_a_at                     | 4.6         | Sqstm1                  | sequestosome 1                                                                                                                                                                                           |
| 1425281_a_at                     | 4.6         | Tsc22d3                 | TSC22 domain family, member 3                                                                                                                                                                            |
| 1417487_at                       | 4.5         | Fosl1                   | fos-like antigen 1                                                                                                                                                                                       |
| 1450582_at                       | 4.5         | H2-Q5                   | histocompatibility 2, Q region locus 5                                                                                                                                                                   |
| 1420089_at                       | 4.4         | Nfkbia                  | Nuclear factor of kappa light polypeptide gene enhancer in B-cells inhibitor, alpha (Nfkbia), mRNA                                                                                                       |
| 1421042_at                       | 4.4         | Arhgef2                 | rho/rac guanine nucleotide exchange factor (GEF) 2                                                                                                                                                       |
| 1431843_a_at                     | 4.3         | Nfkbie                  | nuclear factor of kappa light polypeptide gene enhancer in B-cells inhibitor, epsilon                                                                                                                    |
| 1420710_at                       | 4.3         | Rel                     | reticuloendotheliosis oncogene                                                                                                                                                                           |
| 1417408_at                       | 4.2         | F3                      | coagulation factor III                                                                                                                                                                                   |
| 1433454_at                       | 4.2         | Abtb2                   | ankyrin repeat and BTB (POZ) domain containing 2                                                                                                                                                         |
| 1421992_a_at                     | 4.1         | Igfbp4                  | insulin-like growth factor binding protein 4                                                                                                                                                             |
| 1429040_at                       | 4.1         | 6820431F20Rik           | RIKEN cDNA 6820431F20 gene                                                                                                                                                                               |
| 1452418_at                       | 4.1         | 1200016E24Rik           | RIKEN cDNA 1200016E24 gene                                                                                                                                                                               |
| 1457042_at                       | 4.1         | AI256396                | EST AI256396                                                                                                                                                                                             |
| 1429412_at                       | 4.0         | Eny2                    | enhancer of yellow 2 homolog (Drosophila)                                                                                                                                                                |
| 1419702_at                       | 4.0         | Taf1a                   | TATA box binding protein (Tbp)-associated factor, RNA polymerase I, A                                                                                                                                    |
| 1423903_at                       | 3.9         | Pvr                     | poliovirus receptor                                                                                                                                                                                      |
| 1416268_at                       | 3.9         | Ets2                    | E26 avian leukemia oncogene 2, 3' domain                                                                                                                                                                 |
| 1450970_at                       | 3.9         | Got1                    | glutamate oxaloacetate transaminase 1, soluble                                                                                                                                                           |
| 1453590_at                       | 3.9         | Arl5b                   | ADP-ribosylation factor-like 5B                                                                                                                                                                          |
| 1427540_at                       | 3.9         | Zwint                   | ZW10 interactor                                                                                                                                                                                          |
| 1439029_at                       | 3.9         | Gpt2                    | glutamic pyruvate transaminase (alanine aminotransferase) 2                                                                                                                                              |
| 1425139_at                       | 3.9         | Sesn2                   | sestrin 2                                                                                                                                                                                                |
| 1438148_at                       | 3.8         | Cxcl3                   | chemokine (C-X-C motif) ligand 3                                                                                                                                                                         |
| 1421392_a_at                     | 3.8         | Birc3                   | baculoviral IAP repeat-containing 3                                                                                                                                                                      |
| 1448136_at                       | 3.8         | Enpp2                   | ectonucleotide pyrophosphatase/phosphodiesterase 2                                                                                                                                                       |
| 1435462_at                       | 3.8         | Plcxd2                  | phosphatidylinositol-specific phospholipase C, X domain containing 2                                                                                                                                     |
| 1437884_at                       | 3.7         | Arl5b                   | ADP-ribosylation factor-like 5B                                                                                                                                                                          |
| 1422573_at                       | 3.7         | Ampd3                   | adenosine monophosphate deaminase 3                                                                                                                                                                      |
| 1421308_at                       | 3.7         | Car13                   | carbonic anhydrase 13                                                                                                                                                                                    |
| 1460465_at                       | 3.7         | A930038C07Rik           | RIKEN cDNA A930038C07 gene                                                                                                                                                                               |
| 1433674_a_at                     | 3.7         | Snhg1                   | small nucleolar RNA host gene (non-protein coding) 1                                                                                                                                                     |
| 1421236_at                       | 3.6         | Ripk2                   | receptor (TNFRSF)-interacting serine-threonine kinase 2                                                                                                                                                  |
| 1455324_at                       | 3.6         | Plcxd2                  | phosphatidylinositol-specific phospholipase C, X domain containing 2                                                                                                                                     |
| 1427518_at                       | 3.6         | D10627                  | cDNA sequence D10627                                                                                                                                                                                     |
| 1423156_at                       | 3.6         | Gnpat1                  | glucosamine-phosphate N-acetyltransferase 1                                                                                                                                                              |
| 1427372_at                       | 3.6         | Cyp27b1                 | cytochrome P450, family 27, subfamily b, polypeptide 1                                                                                                                                                   |
| 1455657_at                       | 3.5         | Smg1                    | SMG1 homolog, phosphatidylinositol 3-kinase-related kinase (C. elegans)                                                                                                                                  |
| 1451593_at                       | 3.5         | H2-K1                   | MRNA similar to histocompatibility 2, D region locus 1 (cDNA clone MGC:25703 IMAGE:3675316)                                                                                                              |
| 1429144_at                       | 3.5         | Prei4                   | preimplantation protein 4                                                                                                                                                                                |
| 1423685_at                       | 3.4         | Aars                    | alanyl-tRNA synthetase                                                                                                                                                                                   |
| 1434015_at                       | 3.4         | Slc2a6                  | solute carrier family 2 (facilitated glucose transporter), member 6                                                                                                                                      |
| 1428365_a_at                     | 3.4         | Lonp1                   | lon peptidase 1, mitochondrial                                                                                                                                                                           |

|              |     |                                 |                                                                                                                                                              |
|--------------|-----|---------------------------------|--------------------------------------------------------------------------------------------------------------------------------------------------------------|
| 1419148_at   | 3.4 | Avil                            | advillin                                                                                                                                                     |
| 1420088_at   | 3.4 | Nfkbia                          | nuclear factor of kappa light polypeptide gene enhancer in B-cells inhibitor, alpha                                                                          |
| 1437152_at   | 3.4 | Mex3b                           | mex3 homolog B (C. elegans)                                                                                                                                  |
| 1449668_s_at | 3.3 | Fnip1                           | folliculin interacting protein 1                                                                                                                             |
| 1415940_at   | 3.3 | Zfand2a                         | zinc finger, AN1-type domain 2A                                                                                                                              |
| 1434980_at   | 3.2 | Pik3r5                          | phosphoinositide-3-kinase, regulatory subunit 5, p101                                                                                                        |
| 1421065_at   | 3.2 | Jak2                            | Janus kinase 2                                                                                                                                               |
| 1448436_a_at | 3.2 | Irf1                            | interferon regulatory factor 1                                                                                                                               |
| 1431035_at   | 3.2 | Daam1                           | dishevelled associated activator of morphogenesis 1                                                                                                          |
| 1453823_a_at | 3.1 | Ccdc76                          | coiled-coil domain containing 76                                                                                                                             |
| 1434130_at   | 3.0 | Lhfp12                          | lipoma HMGIC fusion partner-like 2                                                                                                                           |
| 1431252_a_at | 3.0 | Zfp655                          | zinc finger protein 655                                                                                                                                      |
| 1419697_at   | 3.0 | Cxcl11 /// LOC630447            | chemokine (C-X-C motif) ligand 11 /// similar to Small inducible cytokine B11 precursor (CXCL11) (Interferon-inducible T-cell alpha chemoattractant) (I-TAC) |
| 1444021_at   | 3.0 | Sqstm1                          | sequestosome 1                                                                                                                                               |
| 1426421_s_at | 3.0 | Rbm26                           | RNA binding motif protein 26                                                                                                                                 |
| 1434786_at   | 2.9 | Ppp1r12b                        | protein phosphatase 1, regulatory (inhibitor) subunit 12B                                                                                                    |
| 1451018_at   | 2.9 | Leprot11                        | leptin receptor overlapping transcript-like 1                                                                                                                |
| 1416186_at   | 2.9 | Pnrc2                           | proline-rich nuclear receptor coactivator 2                                                                                                                  |
| 1428666_at   | 2.9 | Nars                            | asparaginyl-tRNA synthetase                                                                                                                                  |
| 1438045_at   | 2.9 | Eea1                            | early endosome antigen 1                                                                                                                                     |
| 1437566_at   | 2.9 | LOC633966                       | similar to guanine nucleotide binding protein-like 2 (nucleolar)                                                                                             |
| 1437751_at   | 2.9 | Ppargc1a                        | peroxisome proliferative activated receptor, gamma, coactivator 1 alpha                                                                                      |
| 1428560_at   | 2.8 | Xpo5                            | exportin 5                                                                                                                                                   |
| 1421273_at   | 2.8 | Socs4                           | suppressor of cytokine signaling 4                                                                                                                           |
| 1442434_at   | 2.8 | D8Ert82e                        | DNA segment, Chr 8, ERATO Doi 82, expressed                                                                                                                  |
| 1426290_at   | 2.8 | Dimt1                           | DIM1 dimethyladenosine transferase 1-like (S. cerevisiae)                                                                                                    |
| 1437696_at   | 2.8 | BC049807                        | cDNA sequence BC049807                                                                                                                                       |
| 1422822_at   | 2.8 | Stard5                          | StAR-related lipid transfer (START) domain containing 5                                                                                                      |
| 1434460_at   | 2.8 | Bbs4                            | Bardet-Biedl syndrome 4 (human)                                                                                                                              |
| 1450474_at   | 2.8 | Serpinb9c                       | serine (or cysteine) peptidase inhibitor, clade B, member 9c                                                                                                 |
| 1451959_a_at | 2.8 | Vegfa                           | vascular endothelial growth factor A                                                                                                                         |
| 1419210_at   | 2.8 | Hrh1                            | histamine receptor H1                                                                                                                                        |
| 1433850_at   | 2.8 | Ppp4r2                          | protein phosphatase 4, regulatory subunit 2                                                                                                                  |
| 1448932_at   | 2.8 | Krt16                           | keratin 16                                                                                                                                                   |
| 1455823_at   | 2.7 | Bbs4                            | Bardet-Biedl syndrome 4 (human)                                                                                                                              |
| 1429337_at   | 2.7 | Tmem87b                         | transmembrane protein 87B                                                                                                                                    |
| 1432249_a_at | 2.7 | Ercc8                           | excision repair cross-complementing rodent repair deficiency, complementation group 8                                                                        |
| 1437176_at   | 2.7 | AI451557                        | expressed sequence AI451557                                                                                                                                  |
| 1421712_at   | 2.7 | Sele                            | selectin, endothelial cell                                                                                                                                   |
| 1453727_at   | 2.7 | Esf1                            | ESF1, nucleolar pre-rRNA processing protein, homolog (S. cerevisiae)                                                                                         |
| 1437082_at   | 2.7 | Akap9                           | A kinase (PRKA) anchor protein (yotiao) 9                                                                                                                    |
| 1424533_a_at | 2.7 | Ccdc137                         | coiled-coil domain containing 137                                                                                                                            |
| 1425356_at   | 2.7 | Zfp142                          | zinc finger protein 142                                                                                                                                      |
| 1424866_at   | 2.7 | Usp43                           | ubiquitin specific peptidase 43                                                                                                                              |
| 1418504_at   | 2.7 | Hspa9                           | heat shock protein 9                                                                                                                                         |
| 1424150_at   | 2.7 | Gdpd5                           | glycerophosphodiester phosphodiesterase domain containing 5                                                                                                  |
| 1419536_a_at | 2.6 | Rela                            | v-rel reticuloendotheliosis viral oncogene homolog A (avian)                                                                                                 |
| 1422567_at   | 2.6 | Fam129a                         | family with sequence similarity 129, member A                                                                                                                |
| 1426928_at   | 2.6 | Ccdc93                          | coiled-coil domain containing 93                                                                                                                             |
| 1427689_a_at | 2.6 | Tnip1                           | TNFAIP3 interacting protein 1                                                                                                                                |
| 1448957_at   | 2.6 | Rbpj                            | recombination signal binding protein for immunoglobulin kappa J region                                                                                       |
| 1431351_at   | 2.6 | Pvt1                            | plasmacytoma variant translocation 1                                                                                                                         |
| 1426291_at   | 2.6 | Dimt1                           | DIM1 dimethyladenosine transferase 1-like (S. cerevisiae)                                                                                                    |
| 1428674_at   | 2.6 | Prpf38b                         | PRP38 pre-mRNA processing factor 38 (yeast) domain containing B                                                                                              |
| 1451873_a_at | 2.6 | Smad5                           | MAD homolog 5 (Drosophila)                                                                                                                                   |
| 1451950_a_at | 2.6 | Cd80                            | CD80 antigen                                                                                                                                                 |
| 1436074_at   | 2.6 | Nfkbid                          | nuclear factor of kappa light polypeptide gene enhancer in B-cells inhibitor, delta                                                                          |
| 1426533_at   | 2.5 | Nol5a                           | nucleolar protein 5A                                                                                                                                         |
| 1426852_x_at | 2.5 | Nov                             | nephroblastoma overexpressed gene                                                                                                                            |
| 1449670_x_at | 2.5 | Gpr137b /// LOC100044979        | G protein-coupled receptor 137B /// similar to Gpr137b protein                                                                                               |
| 1437476_at   | 2.5 | Rrm2b                           | ribonucleotide reductase M2 B (TP53 inducible)                                                                                                               |
| 1430704_at   | 2.5 | Irak3                           | interleukin-1 receptor-associated kinase 3                                                                                                                   |
| 1460369_at   | 2.5 | BC003267                        | cDNA sequence BC003267                                                                                                                                       |
| 1437495_at   | 2.5 | LOC100047187 /// Mbtps2 /// Yy2 | similar to zinc finger, X-linked, duplicated B /// membrane-bound transcription factor peptidase, site 2 /// Yy2 transcription factor                        |
| 1419924_at   | 2.5 | Fnip1                           | Folliculin interacting protein 1, mRNA (cDNA clone MGC:100017 IMAGE:30543296)                                                                                |
| 1438400_at   | 2.5 | 4632411B12Rik                   | RIKEN cDNA 4632411B12 gene                                                                                                                                   |
| 1442726_s_at | 2.4 | AI845619                        | expressed sequence AI845619                                                                                                                                  |
| 1430147_a_at | 2.4 | Taf1d                           | TATA box binding protein (Tbp)-associated factor, RNA polymerase I, D                                                                                        |
| 1435155_at   | 2.4 | Cgn                             | cingulin                                                                                                                                                     |
| 1416998_at   | 2.4 | Rrs1                            | RRS1 ribosome biogenesis regulator homolog (S. cerevisiae)                                                                                                   |
| 1438081_at   | 2.4 | Mcc                             | mutated in colorectal cancers                                                                                                                                |
| 1434364_at   | 2.4 | Map3k14                         | mitogen-activated protein kinase kinase 14                                                                                                                   |
| 1452154_at   | 2.4 | Iars                            | isoleucine-tRNA synthetase                                                                                                                                   |
| 1427705_a_at | 2.4 | Nfkbl1                          | nuclear factor of kappa light polypeptide gene enhancer in B-cells 1, p105                                                                                   |
| 1429527_a_at | 2.4 | Plscr1                          | phospholipid scramblase 1                                                                                                                                    |
| 1421153_at   | 2.4 | Loxl4                           | lysyl oxidase-like 4                                                                                                                                         |
| 1426423_at   | 2.4 | Shmt2                           | serine hydroxymethyltransferase 2 (mitochondrial)                                                                                                            |
| 1422286_a_at | 2.4 | Tgfb1                           | TGF-beta-induced factor homeobox 1                                                                                                                           |
| 1455237_at   | 2.3 | Usp36                           | ubiquitin specific peptidase 36                                                                                                                              |
| 1437965_at   | 2.3 | Heatr1                          | HEAT repeat containing 1                                                                                                                                     |
| 1457780_at   | 2.3 | Stx11                           | syntaxin 11                                                                                                                                                  |
| 1452858_at   | 2.3 | Elav1                           | ELAV (embryonic lethal, abnormal vision, Drosophila)-like 1 (Hu antigen R)                                                                                   |
| 1426459_s_at | 2.3 | AW549877                        | expressed sequence AW549877                                                                                                                                  |
| 1423991_at   | 2.3 | Nop14                           | NOP14 nucleolar protein homolog (yeast)                                                                                                                      |

|              |     |                        |                                                                                                      |
|--------------|-----|------------------------|------------------------------------------------------------------------------------------------------|
| 1422847_a_at | 2.3 | Prkcd                  | protein kinase C, delta                                                                              |
| 1417675_a_at | 2.3 | Mdn1                   | midasin homolog (yeast)                                                                              |
| 1460323_at   | 2.3 | Tars                   | threonyl-tRNA synthetase                                                                             |
| 1424030_at   | 2.3 | Grhl1 /// LOC100043996 | grainyhead-like 1 (Drosophila) /// similar to Grhl1 protein                                          |
| 1451468_s_at | 2.3 | Xpo5                   | exportin 5                                                                                           |
| 1427322_at   | 2.3 | Brwd1                  | bromodomain and WD repeat domain containing 1                                                        |
| 1424043_at   | 2.3 | Ppil4                  | peptidylprolyl isomerase (cyclophilin)-like 4                                                        |
| 1447873_x_at | 2.3 | Bid                    | BH3 interacting domain death agonist                                                                 |
| 1421066_at   | 2.3 | Jak2                   | Janus kinase 2                                                                                       |
| 1458148_at   | 2.3 | Nlr3                   | NLR family, CARD domain containing 3                                                                 |
| 1426420_at   | 2.3 | Rbm26                  | RNA binding motif protein 26                                                                         |
| 1426827_at   | 2.3 | Ythdc1                 | YTH domain containing 1                                                                              |
| 1444402_at   | 2.3 | Zc3h12c                | zinc finger CCCH type containing 12C                                                                 |
| 1451095_at   | 2.2 | Asns                   | asparagine synthetase                                                                                |
| 1453504_at   | 2.2 | Taf15                  | TAF15 RNA polymerase II, TATA box binding protein (TBP)-associated factor                            |
| 1436897_at   | 2.2 | Mfhas1                 | malignant fibrous histiocytoma amplified sequence 1                                                  |
| 1419169_at   | 2.2 | Mapk6                  | mitogen-activated protein kinase 6                                                                   |
| 1444086_at   | 2.2 | E030049G20Rik          | RIKEN cDNA E030049G20 gene                                                                           |
| 1425686_at   | 2.2 | Cflar                  | CASP8 and FADD-like apoptosis regulator                                                              |
| 1435240_at   | 2.2 | Baz2b                  | bromodomain adjacent to zinc finger domain, 2B                                                       |
| 1418960_at   | 2.2 | Phf201                 | PHD finger protein 20-like 1                                                                         |
| 1418007_at   | 2.2 | 1810007M14Rik          | RIKEN cDNA 1810007M14 gene                                                                           |
| 1421240_at   | 2.2 | Em1                    | endoplasmic reticulum (ER) to nucleus signalling 1                                                   |
| 1422054_a_at | 2.2 | Skil                   | SKI-like                                                                                             |
| 1418661_at   | 2.2 | Abhd2                  | abhydrolase domain containing 2                                                                      |
| 1425681_a_at | 2.2 | Prnd                   | prion protein dublet                                                                                 |
| 1419105_at   | 2.2 | Nr1h4                  | nuclear receptor subfamily 1, group H, member 4                                                      |
| 1449314_at   | 2.2 | Zfpm2                  | zinc finger protein, multitype 2                                                                     |
| 1415881_at   | 2.1 | Ghitm                  | growth hormone inducible transmembrane protein                                                       |
| 1434238_at   | 2.1 | Taf2                   | TAF2 RNA polymerase II, TATA box binding protein (TBP)-associated factor                             |
| 1433798_a_at | 2.1 | E330034G19Rik          | RIKEN cDNA E330034G19 gene                                                                           |
| 1429774_a_at | 2.1 | Fam175a                | family with sequence similarity 175, member A                                                        |
| 1426083_a_at | 2.1 | Btg1 /// LOC100047353  | B-cell translocation gene 1, anti-proliferative /// similar to myocardial vascular inhibition factor |
| 1455567_at   | 2.1 | Crks                   | CDC2-related kinase, arginine/serine-rich                                                            |
| 1419208_at   | 2.1 | Map3k8                 | mitogen-activated protein kinase kinase kinase 8                                                     |
| 1454914_at   | 2.1 | 2610101N10Rik          | RIKEN cDNA 2610101N10 gene                                                                           |
| 1425969_a_at | 2.1 | Htt                    | huntingtin                                                                                           |
| 1418375_at   | 2.1 | Mbd6                   | methyl-CpG binding domain protein 6                                                                  |
| 1437730_at   | 2.1 | Ppp2r2a                | protein phosphatase 2 (formerly 2A), regulatory subunit B (PR 52), alpha isoform                     |
| 1416432_at   | 2.1 | Pfkfb3                 | 6-phosphofructo-2-kinase/fructose-2,6-biphosphatase 3                                                |
| 1432466_a_at | 2.1 | Apoe                   | apolipoprotein E                                                                                     |
| 1416543_at   | 2.1 | Nfe2l2                 | nuclear factor, erythroid derived 2, like 2                                                          |
| 1426381_at   | 2.1 | Pprc1                  | peroxisome proliferative activated receptor, gamma, coactivator-related 1                            |
| 1427159_at   | 2.1 | Pcf11                  | cleavage and polyadenylation factor subunit homolog (S. cerevisiae)                                  |
| 1417393_a_at | 2.1 | Fam132a                | family with sequence similarity 132, member A                                                        |
| 1424250_a_at | 2.1 | Arhgef3                | Rho guanine nucleotide exchange factor (GEF) 3                                                       |
| 1448855_at   | 2.1 | Rassf1                 | Ras association (RalGDS/AF-6) domain family member 1                                                 |
| 1440875_a_at | 2.0 | Rsad1                  | radical S-adenosyl methionine domain containing 1                                                    |
| 1454648_s_at | 2.0 | D10Wsu102e             | DNA segment, Chr 10, Wayne State University 102, expressed                                           |
| 1433555_at   | 2.0 | Eaf1                   | ELL associated factor 1                                                                              |
| 1433926_at   | 2.0 | Dync1li2               | dynein, cytoplasmic 1 light intermediate chain 2                                                     |
| 1416862_at   | 2.0 | Stam                   | signal transducing adaptor molecule (SH3 domain and ITAM motif) 1                                    |
| 1418465_at   | 2.0 | Nct4                   | neutrophil cytosolic factor 4                                                                        |
| 1457222_at   | 2.0 | Creb5                  | cAMP responsive element binding protein 5                                                            |
| 1425642_at   | 2.0 | Cep290                 | centrosomal protein 290                                                                              |
| 1460483_at   | 2.0 | 2610034E01Rik          | RIKEN cDNA 2610034E01 gene                                                                           |
| 1455153_at   | 2.0 | Zfp236                 | zinc finger protein 236                                                                              |
| 1419558_at   | 2.0 | Mdm4                   | transformed mouse 3T3 cell double minute 4                                                           |
| 1420958_at   | 2.0 | Sys1                   | SYS1 Golgi-localized integral membrane protein homolog (S. cerevisiae)                               |
| 1435434_at   | 2.0 | Braf                   | Braf transforming gene                                                                               |
| 1416126_at   | 2.0 | Poir1b                 | polymerase (RNA) I polypeptide B                                                                     |
| 1434080_at   | 1.9 | Aebp2                  | AE binding protein 2                                                                                 |
| 1426671_a_at | 1.9 | Rbm39                  | RNA binding motif protein 39                                                                         |
| 1459910_at   | 1.9 | Tnks                   | tankyrase, TRF1-interacting ankyrin-related ADP-ribose polymerase                                    |
| 1421148_a_at | 1.9 | Tial1                  | Tia1 cytotoxic granule-associated RNA binding protein-like 1                                         |
| 1434298_at   | 1.9 | Zeb2                   | zinc finger E-box binding homeobox 2                                                                 |
| 1435904_at   | 1.9 | Eif2c3                 | eukaryotic translation initiation factor 2C, 3                                                       |
| 1429005_at   | 1.9 | Mfhas1                 | malignant fibrous histiocytoma amplified sequence 1                                                  |
| 1450651_at   | 1.9 | Myo10                  | myosin X                                                                                             |
| 1460435_at   | 1.9 | 1500002O20Rik          | RIKEN cDNA 1500002O20 gene                                                                           |
| 1455218_at   | 1.9 | 6330503K22Rik          | RIKEN cDNA 6330503K22 gene                                                                           |
| 1450703_at   | 1.9 | Slc7a2                 | solute carrier family 7 (cationic amino acid transporter, y+ system), member 2                       |
| 1451998_at   | 1.9 | Tasp1                  | taspase, threonine aspartase 1                                                                       |
| 1440447_at   | 1.9 | Abhd2                  | abhydrolase domain containing 2                                                                      |
| 1441513_at   | 1.9 | Tank                   | TRAF family member-associated NF-kappa B activator                                                   |
| 1429371_at   | 1.9 | 2810426N06Rik          | RIKEN cDNA 2810426N06 gene                                                                           |
| 1427088_at   | 1.9 | Ccnt2                  | cyclin T2                                                                                            |
| 1417712_at   | 1.9 | Eif2s2                 | eukaryotic translation initiation factor 2, subunit 2 (beta)                                         |
| 1428846_at   | 1.9 | Ttc14                  | tetratricopeptide repeat domain 14                                                                   |
| 1449014_at   | 1.9 | Lactb /// LOC677144    | lactamase, beta /// similar to lactamase, beta                                                       |
| 1428389_s_at | 1.9 | Wdr43                  | WD repeat domain 43                                                                                  |
| 1428375_at   | 1.9 | 4932415G12Rik          | RIKEN cDNA 4932415G12 gene                                                                           |
| 1455035_s_at | 1.9 | Nol5a                  | nucleolar protein 5A                                                                                 |
| 1434082_at   | 1.9 | Pctk2                  | PCTAIRE-motif protein kinase 2                                                                       |
| 1415911_at   | 1.9 | Impact                 | imprinted and ancient                                                                                |
| 1418985_at   | 1.9 | Ctnb2nl                | CTTNBP2 N-terminal like                                                                              |

|              |      |                         |                                                                                            |
|--------------|------|-------------------------|--------------------------------------------------------------------------------------------|
| 1448965_at   | 1.8  | Ino80                   | INO80 homolog (S. cerevisiae)                                                              |
| 1425495_at   | 1.8  | Zfp62                   | zinc finger protein 62                                                                     |
| 1424594_at   | 1.8  | Lgals7                  | lectin, galactose binding, soluble 7                                                       |
| 1453048_at   | 1.8  | Nhlrc2                  | NHL repeat containing 2                                                                    |
| 1425774_at   | 1.8  | 1500001A10Rik           | RIKEN cDNA 1500001A10 gene                                                                 |
| 1455171_at   | 1.8  | Suv420h1                | suppressor of variegation 4-20 homolog 1 (Drosophila)                                      |
| 1423389_at   | 1.8  | Smad7                   | MAD homolog 7 (Drosophila)                                                                 |
| 1434332_at   | 1.8  | Zz3                     | zinc finger, ZZ domain containing 3                                                        |
| 1428493_at   | 1.8  | Sipa13                  | signal-induced proliferation-associated 1 like 3                                           |
| 1428366_at   | 1.8  | 1600027N09Rik           | RIKEN cDNA 1600027N09 gene                                                                 |
| 1454074_a_at | 1.8  | Rsrc2                   | arginine/serine-rich coiled-coil 2                                                         |
| 1439811_at   | 1.8  | Mtr                     | 5-methyltetrahydrofolate-homocysteine methyltransferase                                    |
| 1436562_at   | 1.8  | Ddx58                   | DEAD (Asp-Glu-Ala-Asp) box polypeptide 58                                                  |
| 1451896_a_at | 1.8  | Cherp                   | calcium homeostasis endoplasmic reticulum protein                                          |
| 1427120_at   | 1.8  | Zfp26                   | zinc finger protein 26                                                                     |
| 1454982_at   | 1.8  | Arfgef2                 | ADP-ribosylation factor guanine nucleotide-exchange factor 2 (brefeldin A-inhibited)       |
| 1422945_a_at | 1.8  | Kif5c                   | kinesin family member 5C                                                                   |
| 1434036_at   | 1.8  | Mtss1                   | metastasis suppressor 1                                                                    |
| 1426286_at   | 1.8  | Noc3l                   | nucleolar complex associated 3 homolog (S. cerevisiae)                                     |
| 1440984_at   | 1.8  | Baz2b                   | bromodomain adjacent to zinc finger domain, 2B                                             |
| 1453028_at   | 1.8  | Pwwp2a                  | PWWP domain containing 2A                                                                  |
| 1440406_at   | 1.7  | Gpatch3                 | G patch domain containing 3                                                                |
| 1428616_at   | 1.7  | LOC100040573 /// Zfp131 | similar to putative transcription factor ZNF131 /// zinc finger protein 131                |
| 1419666_at   | 1.7  | 1600012F09Rik           | RIKEN cDNA 1600012F09 gene                                                                 |
| 1440125_at   | 1.7  | A530054K11Rik           | RIKEN cDNA A530054K11 gene                                                                 |
| 1434904_at   | 1.7  | Hivep2                  | human immunodeficiency virus type I enhancer binding protein 2                             |
| 1417771_a_at | 1.7  | Psmc6                   | proteasome (prosome, macropain) 26S subunit, ATPase, 6                                     |
| 1433925_at   | 1.7  | Dync1l12                | dynein, cytoplasmic 1 light intermediate chain 2                                           |
| 1439483_at   | 1.7  | A1506816                | expressed sequence A1506816                                                                |
| 1434453_at   | 1.7  | Polr3a                  | polymerase (RNA) III (DNA directed) polypeptide A                                          |
| 1438016_at   | 1.7  | Dkc1                    | dyskeratosis congenita 1, dyskerin homolog (human)                                         |
| 1428199_at   | 1.7  | Adal                    | adenosine deaminase-like                                                                   |
| 1422027_a_at | 1.7  | Ets1                    | E26 avian leukemia oncogene 1, 5' domain                                                   |
| 1457351_at   | 1.6  | Taf2                    | TAF2 RNA polymerase II, TATA box binding protein (TBP)-associated factor                   |
| 1435033_at   | 1.6  | Arhgef4                 | Rho guanine nucleotide exchange factor (GEF) 4                                             |
| 1428084_at   | 1.6  | Krr1                    | KRR1, small subunit (SSU) processome component, homolog (yeast)                            |
| 1456405_at   | 1.6  | Dido1                   | death inducer-obliterator 1                                                                |
| 1423600_a_at | 1.6  | Tcof1                   | Treacher Collins Franceschetti syndrome 1, homolog                                         |
| 1435338_at   | 1.6  | Cdk6                    | cyclin-dependent kinase 6                                                                  |
| 1423784_at   | 1.6  | Gars                    | glycyl-tRNA synthetase                                                                     |
| 1442982_at   | 1.6  | Ccdc66                  | coiled-coil domain containing 66                                                           |
| 1451567_a_at | 1.6  | Ifi203                  | interferon activated gene 203                                                              |
| 1438606_a_at | 1.6  | Clic4                   | chloride intracellular channel 4 (mitochondrial)                                           |
| 1452091_a_at | 1.6  | Rbm28                   | RNA binding motif protein 28                                                               |
| 1457059_at   | 1.6  | Zfp438                  | zinc finger protein 438                                                                    |
|              |      | EG634650 /// Gbp10 ///  |                                                                                            |
| 1447927_at   | 1.6  | Mpa2l                   | predicted gene, EG634650 /// guanylate-binding protein 10 /// macrophage activation 2 like |
| 1424498_at   | 1.6  | Atf3                    | atlastin GTPase 3                                                                          |
| 1428737_s_at | 1.5  | Gramd3                  | GRAM domain containing 3                                                                   |
| 1428682_at   | 1.5  | Zc3h6                   | zinc finger CCCH type containing 6                                                         |
| 1433697_at   | 1.5  | Pat1                    | protein associated with topoisomerase II homolog 1 (yeast)                                 |
| 1415730_at   | 1.5  | 573045316Rik            | RIKEN cDNA 573045316 gene                                                                  |
|              |      | H3f3a /// H3f3b ///     |                                                                                            |
| 1455725_a_at | 1.5  | LOC100045490            | H3 histone, family 3A /// H3 histone, family 3B /// similar to H3 histone, family 3A       |
| 1424532_at   | 1.4  | Ylpm1                   | YLP motif containing 1                                                                     |
| 1457900_at   | 1.4  | Ascc3                   | activating signal cointegrator 1 complex subunit 3                                         |
| 1455413_at   | 1.4  | Zfp11                   | zinc finger protein 11                                                                     |
| 1437104_at   | 1.4  | Arfgef1                 | ADP-ribosylation factor guanine nucleotide-exchange factor 1(brefeldin A-inhibited)        |
| 1434936_at   | 1.4  | Hirip3                  | HIRA interacting protein 3                                                                 |
| 1444023_at   | 1.4  | Ank2                    | ankyrin 2, brain                                                                           |
| 1422254_a_at | -1.3 | Dyrk1b                  | dual-specificity tyrosine-(Y)-phosphorylation regulated kinase 1b                          |
| 1429880_at   | -1.3 | 4921531C22Rik           | RIKEN cDNA 4921531C22 gene                                                                 |
| 1430123_a_at | -1.4 | Akr1a4                  | aldo-keto reductase family 1, member A4 (aldehyde reductase)                               |
| 1451209_at   | -1.5 | Lass5                   | LAG1 homolog, ceramide synthase 5                                                          |
| 1447363_s_at | -1.5 | Bub1b                   | budding uninhibited by benzimidazoles 1 homolog, beta (S. cerevisiae)                      |
| 1437393_at   | -1.6 | Prkca                   | protein kinase C, alpha                                                                    |
| 1429887_at   | -1.6 | Nos1                    | nitric oxide synthase 1, neuronal                                                          |
| 1434975_x_at | -1.6 | 4933439C20Rik           | RIKEN cDNA 4933439C20 gene                                                                 |
| 1439377_x_at | -1.7 | Cdc20                   | cell division cycle 20 homolog (S. cerevisiae)                                             |
| 1439394_x_at | -1.7 | Cdc20                   | cell division cycle 20 homolog (S. cerevisiae)                                             |
| 1417732_at   | -1.8 | Anxa8                   | annexin A8                                                                                 |
| 1417756_a_at | -1.8 | Lsp1                    | lymphocyte specific 1                                                                      |
| 1438483_at   | -1.8 | Nos1                    | nitric oxide synthase 1, neuronal                                                          |
| 1455019_x_at | -1.8 | Ckap4                   | cytoskeleton-associated protein 4                                                          |
| 1448392_at   | -1.9 | Sparc                   | secreted acidic cysteine rich glycoprotein                                                 |
| 1455220_at   | -1.9 | Frat2                   | frequently rearranged in advanced T-cell lymphomas 2                                       |
| 1427049_s_at | -2.0 | Smo                     | smoothened homolog (Drosophila)                                                            |
| 1416589_at   | -2.0 | Sparc                   | secreted acidic cysteine rich glycoprotein                                                 |
| 1437289_at   | -2.1 | Impad1                  | inositol monophosphatase domain containing 1                                               |
| 1460559_at   | -2.1 | Kank2                   | KN motif and ankyrin repeat domains 2                                                      |
| 1427234_at   | -2.3 | Vangl1                  | vang-like 1 (van gogh, Drosophila)                                                         |
| 1441137_at   | -2.3 | Bicc1                   | bicaudal C homolog 1 (Drosophila)                                                          |
| 1453055_at   | -2.5 | Sema6d                  | sema domain, transmembrane domain (TM), and cytoplasmic domain, (semaphorin) 6D            |
| 1423484_at   | -2.5 | 4930533K18Rik /// Bicc1 | RIKEN cDNA 4930533K18 gene /// bicaudal C homolog 1 (Drosophila)                           |

Table S3B.

| Moe430_2 GeneChip |             |                         |                                                                                                                                                                     |
|-------------------|-------------|-------------------------|---------------------------------------------------------------------------------------------------------------------------------------------------------------------|
| probeset          | fold-change | gene symbol             | gene description                                                                                                                                                    |
| 1419149_at        | 24.3        | Serpine1                | serine (or cysteine) peptidase inhibitor, clade E, member 1                                                                                                         |
| 1449773_s_at      | 22.9        | Gadd45b                 | growth arrest and DNA-damage-inducible 45 beta                                                                                                                      |
| 1419529_at        | 19.4        | Il23a                   | interleukin 23, alpha subunit p19                                                                                                                                   |
| 1417256_at        | 19.2        | Mmp13                   | matrix metalloproteinase 13                                                                                                                                         |
| 1457644_s_at      | 19.1        | Cxcl1                   | chemokine (C-X-C motif) ligand 1                                                                                                                                    |
| 1434015_at        | 16.1        | Slc2a6                  | solute carrier family 2 (facilitated glucose transporter), member 6                                                                                                 |
| 1420197_at        | 16.1        | Gadd45b                 | Growth arrest and DNA-damage-inducible 45 beta, mRNA (cDNA clone MGC:36156 IMAGE:5355150)                                                                           |
| 1427381_at        | 16.1        | Irg1                    | immunoresponsive gene 1                                                                                                                                             |
| 1450971_at        | 14.5        | Gadd45b                 | growth arrest and DNA-damage-inducible 45 beta                                                                                                                      |
| 1449591_at        | 14.4        | Casp4 /// LOC100044206  | caspase 4, apoptosis-related cysteine peptidase /// hypothetical protein LOC100044206                                                                               |
| 1418930_at        | 14.4        | Cxcl10 /// LOC100045000 | chemokine (C-X-C motif) ligand 10 /// similar to Small inducible cytokine B10 precursor (CXCL10) (Interferon-gamma-induced protein CRG-2) (Gamma-IP10) (IP-10) (C7) |
| 1455197_at        | 13.9        | Rnd1                    | Rho family GTPase 1                                                                                                                                                 |
| 1438148_at        | 13.4        | Cxcl3                   | chemokine (C-X-C motif) ligand 3                                                                                                                                    |
| 1418536_at        | 13.4        | H2-Q7                   | histocompatibility 2, Q region locus 7                                                                                                                              |
| 1425519_a_at      | 12.2        | Cd74                    | CD74 antigen (invariant polypeptide of major histocompatibility complex, class II antigen-associated)                                                               |
| 1425412_at        | 11.3        | Nlrp3                   | NLR family, pyrin domain containing 3                                                                                                                               |
| 1450199_a_at      | 10.7        | Stab1                   | stabilin 1                                                                                                                                                          |
| 1423413_at        | 10.7        | Ndrp1                   | N-myc downstream regulated gene 1                                                                                                                                   |
| 1452418_at        | 10.6        | 1200016E24Rik           | RIKEN cDNA 1200016E24 gene                                                                                                                                          |
| 1460722_at        | 10.1        | Soat2                   | sterol O-acyltransferase 2                                                                                                                                          |
| 1435462_at        | 9.9         | Plcxd2                  | phosphatidylinositol-specific phospholipase C, X domain containing 2                                                                                                |
| 1418829_a_at      | 9.8         | Eno2                    | enolase 2, gamma neuronal                                                                                                                                           |
| 1419675_at        | 9.6         | Ngf                     | nerve growth factor                                                                                                                                                 |
| 1455324_at        | 9.5         | Plicxd2                 | phosphatidylinositol-specific phospholipase C, X domain containing 2                                                                                                |
| 1418936_at        | 9.4         | Maff                    | v-maf musculoaponeurotic fibrosarcoma oncogene family, protein F (avian)                                                                                            |
| 1449731_s_at      | 9.2         | Nfkbia                  | nuclear factor of kappa light polypeptide gene enhancer in B-cells inhibitor, alpha                                                                                 |
| 1433453_a_at      | 9.1         | Abtb2                   | ankyrin repeat and BTB (POZ) domain containing 2                                                                                                                    |
| 1419697_at        | 9.0         | Cxcl11 /// LOC630447    | inducible T-cell alpha chemoattractant) (I-TAC)                                                                                                                     |
| 1422573_at        | 9.0         | Ampd3                   | adenosine monophosphate deaminase 3                                                                                                                                 |
| 1435595_at        | 8.9         | 1810011O10Rik           | RIKEN cDNA 1810011O10 gene                                                                                                                                          |
| 1448485_at        | 8.8         | Ggt1                    | gamma-glutamyltransferase 1                                                                                                                                         |
| 1448306_at        | 8.4         | Nfkbia                  | nuclear factor of kappa light polypeptide gene enhancer in B-cells inhibitor, alpha                                                                                 |
| 1426063_a_at      | 8.4         | Gem                     | GTP binding protein (gene overexpressed in skeletal muscle)                                                                                                         |
| 1420089_at        | 8.4         | Nfkbia                  | Nuclear factor of kappa light polypeptide gene enhancer in B-cells inhibitor, alpha (Nfkbia), mRNA                                                                  |
| 1448610_a_at      | 8.3         | Sod2                    | superoxide dismutase 2, mitochondrial                                                                                                                               |
| 1427372_at        | 8.2         | Cyp27b1                 | cytochrome P450, family 27, subfamily b, polypeptide 1                                                                                                              |
| 1447612_x_at      | 8.1         | Jmjd3                   | jumonji domain containing 3                                                                                                                                         |
| 1450582_at        | 8.1         | H2-Q5                   | histocompatibility 2, Q region locus 5                                                                                                                              |
| 1418188_a_at      | 8.0         | Malat1                  | metastasis associated lung adenocarcinoma transcript 1 (non-coding RNA)                                                                                             |
| 1425155_x_at      | 7.8         | Csf1                    | colony stimulating factor 1 (macrophage)                                                                                                                            |
| 1417813_at        | 7.8         | Ikake                   | inhibitor of kappaB kinase epsilon                                                                                                                                  |
| 1421207_at        | 7.7         | Lif                     | leukemia inhibitory factor                                                                                                                                          |
| 1456014_s_at      | 7.5         | Fermt3                  | fermitin family homolog 3 (Drosophila)                                                                                                                              |
| 1438855_x_at      | 7.4         | Tnfaip2                 | tumor necrosis factor, alpha-induced protein 2                                                                                                                      |
| 1458802_at        | 7.4         | Hivep3                  | human immunodeficiency virus type I enhancer binding protein 3                                                                                                      |
| 1451593_at        | 7.1         | H2-K1                   | MRNA similar to histocompatibility 2, D region locus 1 (cDNA clone MGC:25703 IMAGE:3675316)                                                                         |
| 1424735_at        | 6.9         | Slc25a25                | solute carrier family 25 (mitochondrial carrier, phosphate carrier), member 25                                                                                      |
| 1423904_a_at      | 6.8         | Pvr                     | poliovirus receptor                                                                                                                                                 |
| 1438157_s_at      | 6.8         | Nfkbia                  | nuclear factor of kappa light polypeptide gene enhancer in B-cells inhibitor, alpha                                                                                 |
| 1422053_at        | 6.6         | Inhba                   | inhibin beta-A                                                                                                                                                      |
| 1416273_at        | 6.5         | Tnfaip2                 | tumor necrosis factor, alpha-induced protein 2                                                                                                                      |
| 1418105_at        | 6.4         | Stmn4                   | stathmin-like 4                                                                                                                                                     |
| 1439787_at        | 6.4         | P2rx7                   | purinergic receptor P2X, ligand-gated ion channel, 7                                                                                                                |
| 1454976_at        | 6.3         | Sod2                    | superoxide dismutase 2, mitochondrial                                                                                                                               |
| 1421392_a_at      | 6.2         | Birc3                   | baculoviral IAP repeat-containing 3                                                                                                                                 |
| 1450829_at        | 6.1         | Tnfaip3                 | tumor necrosis factor, alpha-induced protein 3                                                                                                                      |
| 1434980_at        | 5.9         | Pik3r5                  | phosphoinositide-3-kinase, regulatory subunit 5, p101                                                                                                               |
| 1420515_a_at      | 5.8         | Pglyrp2                 | peptidoglycan recognition protein 2                                                                                                                                 |
| 1420330_at        | 5.8         | Clec4e                  | C-type lectin domain family 4, member e                                                                                                                             |
| 1419853_a_at      | 5.7         | P2rx7                   | purinergic receptor P2X, ligand-gated ion channel, 7                                                                                                                |
| 1420088_at        | 5.7         | Nfkbia                  | nuclear factor of kappa light polypeptide gene enhancer in B-cells inhibitor, alpha                                                                                 |
| 1433454_at        | 5.7         | Abtb2                   | ankyrin repeat and BTB (POZ) domain containing 2                                                                                                                    |
| 1420450_at        | 5.6         | Mmp10                   | matrix metalloproteinase 10                                                                                                                                         |
| 1418133_at        | 5.6         | Bcl3                    | B-cell leukemia/lymphoma 3                                                                                                                                          |
| 1453589_a_at      | 5.5         | 6820431F20Rik           | RIKEN cDNA 6820431F20 gene                                                                                                                                          |
| 1422018_at        | 5.5         | Hivep2                  | human immunodeficiency virus type I enhancer binding protein 2                                                                                                      |
| 1460602_at        | 5.5         | Dlc1                    | deleted in liver cancer 1                                                                                                                                           |
| 1438494_at        | 5.4         | Hrh1 /// LOC100041871   | histamine receptor H1 /// similar to histamine receptor H1                                                                                                          |
| 1438707_at        | 5.4         | Atp13a4 /// LOC637970   | ATPase type 13A4 /// similar to type V P-type ATPase isoform 4                                                                                                      |
| 1451160_s_at      | 5.4         | Pvr                     | poliovirus receptor                                                                                                                                                 |
| 1422748_at        | 5.4         | Zeb2                    | zinc finger E-box binding homeobox 2                                                                                                                                |
| 1424067_at        | 5.4         | Icam1                   | intercellular adhesion molecule 1                                                                                                                                   |
| 1417487_at        | 5.3         | Fosl1                   | fos-like antigen 1                                                                                                                                                  |
| 1423903_at        | 5.2         | Pvr                     | poliovirus receptor                                                                                                                                                 |
| 1436173_at        | 5.2         | Dlc1                    | deleted in liver cancer 1                                                                                                                                           |
| 1435540_at        | 5.2         | Irgq                    | immunity-related GTPase family, Q                                                                                                                                   |
| 1434574_at        | 5.1         | 9430008C03Rik           | RIKEN cDNA 9430008C03 gene                                                                                                                                          |
| 1450977_s_at      | 5.1         | Ndrp1                   | N-myc downstream regulated gene 1                                                                                                                                   |
| 1450173_at        | 5.0         | Ripk2                   | receptor (TNFRSF)-interacting serine-threonine kinase 2                                                                                                             |
| 1415989_at        | 5.0         | Vcam1                   | vascular cell adhesion molecule 1                                                                                                                                   |

|              |     |                     |                                                                                              |
|--------------|-----|---------------------|----------------------------------------------------------------------------------------------|
| 1435108_at   | 4.9 | Arhgap22            | Rho GTPase activating protein 22                                                             |
| 1420382_at   | 4.9 | Apob48r             | apolipoprotein B48 receptor                                                                  |
| 1421066_at   | 4.9 | Jak2                | Janus kinase 2                                                                               |
| 1424959_at   | 4.9 | Anxa13              | annexin A13                                                                                  |
| 1434350_at   | 4.8 | Axud1               | AXIN1 up-regulated 1                                                                         |
| 1460336_at   | 4.8 | Ppargc1a            | peroxisome proliferator activated receptor, gamma, coactivator 1 alpha                       |
| 1429040_at   | 4.8 | 6820431F20Rik       | RIKEN cDNA 6820431F20 gene                                                                   |
| 1432059_x_at | 4.7 | 5031425E22Rik       | RIKEN cDNA 5031425E22 gene                                                                   |
| 1417408_at   | 4.7 | F3                  | coagulation factor III                                                                       |
| 1448136_at   | 4.7 | Enpp2               | ectonucleotide pyrophosphatase/phosphodiesterase 2                                           |
| 1440346_at   | 4.7 | Jmj3d3              | Jumonji domain containing 3, mRNA (cDNA clone IMAGE:1378940)                                 |
| 1420992_at   | 4.6 | Ankrd1              | ankyrin repeat domain 1 (cardiac muscle)                                                     |
| 1447870_x_at | 4.6 | 1110002E22Rik       | RIKEN cDNA 1110002E22 gene                                                                   |
| 1420710_at   | 4.6 | Rel                 | reticuloendotheliosis oncogene                                                               |
| 1428909_at   | 4.6 | A130040M12Rik       | RIKEN cDNA A130040M12 gene                                                                   |
| 1443883_at   | 4.5 | Sys1                | SYS1 Golgi-localized integral membrane protein homolog (S. cerevisiae)                       |
| 1437247_at   | 4.5 | Fosl2 /// LOC634417 | fos-like antigen 2 /// similar to fos-like antigen 2                                         |
| 1448436_a_at | 4.5 | Irf1                | interferon regulatory factor 1                                                               |
| 1426464_at   | 4.5 | Nr1d1               | nuclear receptor subfamily 1, group D, member 1                                              |
| 1427540_at   | 4.4 | Zwint               | ZW10 interactor                                                                              |
| 1455029_at   | 4.4 | Kif21a              | kinesin family member 21A                                                                    |
| 1427689_a_at | 4.4 | Tnip1               | TNFAIP3 interacting protein 1                                                                |
|              |     | Fbx110 ///          |                                                                                              |
| 1459861_s_at | 4.4 | OTTMUSG00000006609  | F-box and leucine-rich repeat protein 10 /// predicted gene, OTTMUSG00000006609              |
| 1424408_at   | 4.4 | Lims2               | LIM and senescent cell antigen like domains 2                                                |
| 1437884_at   | 4.3 | Arl5b               | ADP-ribosylation factor-like 5B                                                              |
|              |     | 1200015M12Rik ///   |                                                                                              |
|              |     | 1200016E24Rik ///   |                                                                                              |
|              |     | A130040M12Rik ///   | RIKEN cDNA 1200015M12 gene /// RIKEN cDNA 1200016E24 gene /// RIKEN cDNA A130040M12 gene /// |
| 1435137_s_at | 4.3 | E430024C06Rik       | RIKEN cDNA E430024C06 gene                                                                   |
| 1445843_at   | 4.2 | Chd2                | chromodomain helicase DNA binding protein 2                                                  |
| 1421756_a_at | 4.2 | Gpr19               | G protein-coupled receptor 19                                                                |
| 1449851_at   | 4.2 | Per1                | period homolog 1 (Drosophila)                                                                |
| 1454865_at   | 4.2 | Slc9a8              | solute carrier family 9 (sodium/hydrogen exchanger), member 8                                |
| 1422028_a_at | 4.2 | Ets1                | E26 avian leukemia oncogene 1, 5' domain                                                     |
| 1416432_at   | 4.1 | Pfkfb3              | 6-phosphofructo-2-kinase/fructose-2,6-biphosphatase 3                                        |
| 1434786_at   | 4.1 | Ppp1r12b            | protein phosphatase 1, regulatory (inhibitor) subunit 12B                                    |
| 1436074_at   | 4.1 | Nfkbid              | nuclear factor of kappa light polypeptide gene enhancer in B-cells inhibitor, delta          |
| 1426526_s_at | 4.1 | Ovgp1               | oviductal glycoprotein 1                                                                     |
| 1449702_at   | 4.1 | Zfand2a             | zinc finger, AN1-type domain 2A                                                              |
| 1438796_at   | 4.1 | Nr4a3               | nuclear receptor subfamily 4, group A, member 3                                              |
| 1428691_at   | 4.1 | Chd2                | chromodomain helicase DNA binding protein 2                                                  |
| 1418714_at   | 4.1 | Dusp8               | dual specificity phosphatase 8                                                               |
| 1429588_at   | 4.1 | 2810474O19Rik       | RIKEN cDNA 2810474O19 gene                                                                   |
| 1420591_at   | 4.1 | Gpr84               | G protein-coupled receptor 84                                                                |
| 1416268_at   | 4.0 | Ets2                | E26 avian leukemia oncogene 2, 3' domain                                                     |
| 1450957_a_at | 4.0 | Sqstm1              | sequestosome 1                                                                               |
| 1415941_s_at | 4.0 | Zfand2a             | zinc finger, AN1-type domain 2A                                                              |
| 1450295_s_at | 4.0 | Pvr                 | poliovirus receptor                                                                          |
| 1421236_at   | 3.9 | Ripk2               | receptor (TNFRSF)-interacting serine-threonine kinase 2                                      |
| 1434054_at   | 3.9 | Mafg                | v-maf musculoaponeurotic fibrosarcoma oncogene family, protein G (avian)                     |
| 1435458_at   | 3.9 | Pim1                | proviral integration site 1                                                                  |
| 1427160_at   | 3.9 | Pcf11               | cleavage and polyadenylation factor subunit homolog (S. cerevisiae)                          |
| 1437100_x_at | 3.9 | Pim3                | proviral integration site 3                                                                  |
| 1450430_at   | 3.9 | Mrc1                | mannose receptor, C type 1                                                                   |
| 1450414_at   | 3.9 | Pdgfb               | platelet derived growth factor, B polypeptide                                                |
| 1448026_at   | 3.9 | Chd7                | chromodomain helicase DNA binding protein 7                                                  |
| 1429412_at   | 3.9 | Eny2                | enhancer of yellow 2 homolog (Drosophila)                                                    |
| 1453345_at   | 3.8 | Npal1               | NIPA-like domain containing 1                                                                |
| 1453228_at   | 3.8 | Stx11               | syntaxin 11                                                                                  |
| 1422473_at   | 3.7 | Pde4b               | phosphodiesterase 4B, cAMP specific                                                          |
| 1421065_at   | 3.6 | Jak2                | Janus kinase 2                                                                               |
| 1435470_at   | 3.6 | LOC547150           | similar to p47 protein                                                                       |
| 1454102_at   | 3.6 | 5031425E22Rik       | RIKEN cDNA 5031425E22 gene                                                                   |
| 1429527_a_at | 3.6 | Plscr1              | phospholipid scramblase 1                                                                    |
| 1452397_at   | 3.6 | 2810474O19Rik       | RIKEN cDNA 2810474O19 gene                                                                   |
| 1453181_x_at | 3.6 | Plscr1              | phospholipid scramblase 1                                                                    |
| 1457042_at   | 3.6 | AI256396            | EST AI256396                                                                                 |
| 1428365_a_at | 3.6 | Lonp1               | lon peptidase 1, mitochondrial                                                               |
| 1455266_at   | 3.6 | Kif5c               | kinesin family member 5C                                                                     |
| 1417612_at   | 3.6 | Ier5                | immediate early response 5                                                                   |
| 1455166_at   | 3.5 | Arl5b               | ADP-ribosylation factor-like 5B                                                              |
| 1436094_at   | 3.5 | Vgf                 | VEGF nerve growth factor inducible                                                           |
| 1434774_at   | 3.5 | Rhbdf2              | rhomoid 5 homolog 2 (Drosophila)                                                             |
| 1419029_at   | 3.5 | Ero1l               | ERO1-like (S. cerevisiae)                                                                    |
| 1422474_at   | 3.5 | Pde4b               | phosphodiesterase 4B, cAMP specific                                                          |
| 1441737_s_at | 3.5 | Rassf1              | Ras association (RalGDS/AF-6) domain family member 1                                         |
| 1424866_at   | 3.5 | Usp43               | ubiquitin specific peptidase 43                                                              |
| 1436897_at   | 3.5 | Mfhas1              | malignant fibrous histiocytoma amplified sequence 1                                          |
| 1452214_at   | 3.5 | Skil                | SKI-like                                                                                     |
| 1416600_a_at | 3.5 | Rcan1               | regulator of calcineurin 1                                                                   |
| 1437111_at   | 3.4 | Zc3h12c             | zinc finger CCCH type containing 12C                                                         |
| 1425020_at   | 3.4 | EG621629 /// Ubxn2a | predicted gene, EG621629 /// UB domain protein 2A                                            |
| 1425319_s_at | 3.4 | Snrnp48             | small nuclear ribonucleoprotein 48 (U11/U12)                                                 |
| 1416224_at   | 3.4 | Zbtb17              | zinc finger and BTB domain containing 17                                                     |



|              |     |                               |                                                                                                                                   |
|--------------|-----|-------------------------------|-----------------------------------------------------------------------------------------------------------------------------------|
| 1449168_a_at | 3.4 | Akap2 /// Palm2 /// Palm2-    | A kinase (PRKA) anchor protein 2 /// paralemmin 2 /// Palm2-Akap2 protein                                                         |
| 1421031_a_at | 3.4 | akap2                         | RIKEN cDNA 2310016C08 gene                                                                                                        |
| 1425536_at   | 3.4 | Stx3                          | syntaxin 3                                                                                                                        |
| 1426726_at   | 3.4 | LOC677319 /// Ppp1r10         | similar to protein phosphatase 1, regulatory subunit 10 /// protein phosphatase 1, regulatory subunit 10                          |
| 1448596_at   | 3.4 | Slc6a8                        | solute carrier family 6 (neurotransmitter transporter, creatine), member 8                                                        |
| 1418808_at   | 3.4 | Rdh5                          | retinol dehydrogenase 5                                                                                                           |
| 1419766_at   | 3.4 | Sik1                          | salt inducible kinase 1                                                                                                           |
| 1420618_at   | 3.4 | Cpeb4                         | cytoplasmic polyadenylation element binding protein 4                                                                             |
| 1437176_at   | 3.4 | AI451557                      | expressed sequence AI451557                                                                                                       |
| 1427364_a_at | 3.3 | Odc1                          | ornithine decarboxylase, structural 1                                                                                             |
| 1427143_at   | 3.3 | Jarid1b                       | jumonji, AT rich interactive domain 1B (Rbp2 like)                                                                                |
| 1447923_at   | 3.3 | 1810026B05Rik                 | PREDICTED: Mus musculus RIKEN cDNA 1810026B05 gene, transcript variant 2 (1810026B05Rik), mRNA                                    |
| 1426700_a_at | 3.3 | Usp52                         | ubiquitin specific peptidase 52                                                                                                   |
| 1437751_at   | 3.3 | Ppargc1a                      | peroxisome proliferative activated receptor, gamma, coactivator 1 alpha                                                           |
| 1453590_at   | 3.3 | Arl5b                         | ADP-ribosylation factor-like 5B                                                                                                   |
| 1455567_at   | 3.3 | Crkr5                         | CDC2-related kinase, arginine/serine-rich                                                                                         |
| 1429005_at   | 3.2 | Mfhas1                        | malignant fibrous histiocytoma amplified sequence 1                                                                               |
| 1439488_at   | 3.2 | Dot1l                         | DOT1-like, histone H3 methyltransferase (S. cerevisiae)                                                                           |
| 1427005_at   | 3.2 | Plk2                          | polo-like kinase 2 (Drosophila)                                                                                                   |
| 1434405_at   | 3.2 | Fnip1                         | folliculin interacting protein 1                                                                                                  |
| 1418189_s_at | 3.2 | Malat1                        | metastasis associated lung adenocarcinoma transcript 1 (non-coding RNA)                                                           |
| 1457780_at   | 3.2 | Stx11                         | syntaxin 11                                                                                                                       |
| 1418203_at   | 3.2 | Pmaip1                        | phorbol-12-myristate-13-acetate-induced protein 1                                                                                 |
| 1421365_at   | 3.2 | Fst                           | folllistatin                                                                                                                      |
| 1449164_at   | 3.1 | Cd68                          | CD68 antigen                                                                                                                      |
| 1421712_at   | 3.1 | Sele                          | selectin, endothelial cell                                                                                                        |
| 1447685_x_at | 3.1 | Ets2                          | E26 avian leukemia oncogene 2, 3' domain                                                                                          |
| 1418835_at   | 3.1 | Phlda1                        | pleckstrin homology-like domain, family A, member 1                                                                               |
| 1428674_at   | 3.1 | Prpf38b                       | PRP38 pre-mRNA processing factor 38 (yeast) domain containing B                                                                   |
| 1427988_s_at | 3.1 | Safb2                         | scaffold attachment factor B2                                                                                                     |
| 1423173_at   | 3.1 | Napb                          | N-ethylmaleimide sensitive fusion protein attachment protein beta                                                                 |
| 1433963_a_at | 3.1 | Fermt3                        | fermitin family homolog 3 (Drosophila)                                                                                            |
| 1418422_at   | 3.1 | Serpinc9g                     | serine (or cysteine) peptidase inhibitor, clade B, member 9g                                                                      |
| 1451123_at   | 3.0 | C330016O10Rik                 | RIKEN cDNA C330016O10 gene                                                                                                        |
| 1427159_at   | 3.0 | Pcf11                         | cleavage and polyadenylation factor subunit homolog (S. cerevisiae)                                                               |
| 1435055_a_at | 3.0 | EG545878 /// Tom1             | predicted gene, EG545878 /// target of myb1 homolog (chicken)                                                                     |
| 1434904_at   | 3.0 | Hivep2                        | human immunodeficiency virus type I enhancer binding protein 2                                                                    |
| 1419203_at   | 3.0 | Gtlf3a                        | gene trap locus F3a                                                                                                               |
| 1448855_at   | 3.0 | Rassf1                        | Ras association (RalGDS/AF-6) domain family member 1                                                                              |
| 1419427_at   | 3.0 | Csf3                          | colony stimulating factor 3 (granulocyte)                                                                                         |
| 1428982_at   | 3.0 | Atad2b                        | ATPase family, AAA domain containing 2B                                                                                           |
| 1456699_s_at | 3.0 | Ythdc1                        | YTH domain containing 1                                                                                                           |
| 1441107_at   | 3.0 | Dmrt2                         | doublesex and mab-3 related transcription factor like family A2                                                                   |
| 1424384_a_at | 3.0 | Znrf1                         | zinc and ring finger 1                                                                                                            |
| 1423685_at   | 2.9 | Aars                          | alanyl-tRNA synthetase                                                                                                            |
| 1449668_s_at | 2.9 | Fnip1                         | folliculin interacting protein 1                                                                                                  |
| 1424861_at   | 2.9 | D930016D06Rik                 | RIKEN cDNA D930016D06 gene                                                                                                        |
| 1447927_at   | 2.9 | EG634650 /// Gbp10 ///        | predicted gene, EG634650 /// guanylate-binding protein 10 /// macrophage activation 2 like                                        |
| 1432466_a_at | 2.9 | Mpa2l                         | apolipoprotein E                                                                                                                  |
| 1430353_at   | 2.9 | ApoE                          | GLIS family zinc finger 3                                                                                                         |
| 1457268_at   | 2.9 | Glis3                         | DOT1-like, histone H3 methyltransferase (S. cerevisiae)                                                                           |
| 1452406_x_at | 2.9 | Dot1l                         | erythroid differentiation regulator 1                                                                                             |
| 1427410_at   | 2.9 | Erdr1                         | deleted in lymphocytic leukemia, 2                                                                                                |
| 1434184_s_at | 2.9 | Dleu2                         | mitogen-activated protein kinase kinase kinase kinase 4                                                                           |
| 1422931_at   | 2.9 | Map4k4                        | fos-like antigen 2                                                                                                                |
| 1435155_at   | 2.9 | Fosl2                         | cingulin                                                                                                                          |
| 1449603_at   | 2.9 | Cgn                           | expressed sequence AI594671                                                                                                       |
| 1425241_a_at | 2.9 | AI594671                      | WD repeat and SOCS box-containing 1                                                                                               |
| 1448239_at   | 2.9 | Wsb1                          | heme oxygenase (decycling) 1                                                                                                      |
| 1439221_s_at | 2.9 | Hmox1                         | CD40 antigen                                                                                                                      |
| 1417393_a_at | 2.9 | Cd40                          | family with sequence similarity 132, member A                                                                                     |
| 1419105_at   | 2.9 | Fam132a                       | nuclear receptor subfamily 1, group H, member 4                                                                                   |
| 1448957_at   | 2.9 | Nr1h4                         | recombination signal binding protein for immunoglobulin kappa J region                                                            |
| 1427521_a_at | 2.9 | Rbpj                          | RIKEN cDNA 9930023K05 gene                                                                                                        |
| 1435402_at   | 2.8 | 9930023K05Rik                 | GRAM domain containing 1B                                                                                                         |
| 1454929_s_at | 2.8 | Gramd1b                       | scaffold attachment factor B                                                                                                      |
| 1453285_at   | 2.8 | Safb                          | transmembrane protein 88                                                                                                          |
| 1415940_at   | 2.8 | Tmem88                        | zinc finger, AN1-type domain 2A                                                                                                   |
| 1427047_at   | 2.8 | Zfand2a                       | nucleoporin 188                                                                                                                   |
| 1419536_a_at | 2.8 | Nup188                        | v-rel reticuloendotheliosis viral oncogene homolog A (avian)                                                                      |
| 1438676_at   | 2.8 | Rela                          | macrophage activation 2 like                                                                                                      |
| 1429262_at   | 2.8 | Mpa2l                         | Ras association (RalGDS/AF-6) domain family member 6                                                                              |
| 1449173_at   | 2.8 | Rassf6                        | membrane protein, palmitoylated 2 (MAGUK p55 subfamily member 2)                                                                  |
| 1418465_at   | 2.8 | Mpp2                          | neutrophil cytosolic factor 4                                                                                                     |
| 1436549_a_at | 2.8 | Ncf4                          | heterogeneous nuclear ribonucleoprotein A1                                                                                        |
| 1433798_a_at | 2.8 | Hnrnpa1                       | RIKEN cDNA E330034G19 gene                                                                                                        |
| 1434830_at   | 2.8 | E330034G19Rik                 | MAX dimerization protein 1                                                                                                        |
| 1422033_a_at | 2.8 | Mxd1                          | ciliary neurotrophic factor /// zinc finger protein 91 /// zinc finger protein 91, ciliary neurotrophic factor transcription unit |
| 1453294_at   | 2.8 | Cntf /// Zfp91 /// Zfp91-cntf | RIKEN cDNA 1700012B15 gene                                                                                                        |
| 1435597_at   | 2.8 | 1700012B15Rik                 | ATPase family, AAA domain containing 5                                                                                            |
| 1422864_at   | 2.7 | Atad5                         | runt related transcription factor 1                                                                                               |
| 1419924_at   | 2.7 | Runx1                         | Folliculin interacting protein 1, mRNA (cDNA clone MGC:100017 IMAGE:30543296)                                                     |
| 1440789_at   | 2.7 | Fnip1                         | neogenin                                                                                                                          |
|              |     | Neo1                          |                                                                                                                                   |

|              |     |                            |                                                                                                             |
|--------------|-----|----------------------------|-------------------------------------------------------------------------------------------------------------|
| 1449234_at   | 2.7 | Car15                      | carbonic anhydrase 15                                                                                       |
| 1432103_a_at | 2.7 | Sh3gl3                     | SH3-domain GRB2-like 3                                                                                      |
| 1421499_a_at | 2.7 | Ptpn14                     | protein tyrosine phosphatase, non-receptor type 14                                                          |
| 1439892_at   | 2.7 | Brsk1                      | BR serine/threonine kinase 1                                                                                |
| 1433850_at   | 2.7 | Ppp4r2                     | protein phosphatase 4, regulatory subunit 2                                                                 |
| 1418540_a_at | 2.7 | Ptpre                      | protein tyrosine phosphatase, receptor type, E                                                              |
| 1455046_a_at | 2.7 | Pogz                       | pogo transposable element with ZNF domain                                                                   |
| 1427705_a_at | 2.7 | Nfkb1                      | nuclear factor of kappa light polypeptide gene enhancer in B-cells 1, p105                                  |
| 1448263_a_at | 2.7 | Cndp2                      | CNDP dipeptidase 2 (metallopeptidase M20 family)                                                            |
| 1428560_at   | 2.7 | Xpo5                       | exportin 5                                                                                                  |
| 1453101_at   | 2.7 | Klhl25                     | kelch-like 25 (Drosophila)                                                                                  |
| 1426827_at   | 2.7 | Ythdc1                     | YTH domain containing 1                                                                                     |
| 1434726_at   | 2.7 | Tmem146                    | transmembrane protein 146                                                                                   |
| 1434036_at   | 2.6 | Mtss1                      | metastasis suppressor 1                                                                                     |
| 1427283_at   | 2.6 | Mll1                       | myeloid/lymphoid or mixed-lineage leukemia 1                                                                |
| 1432001_at   | 2.6 | Zmynd17                    | zinc finger, MYND domain containing 17                                                                      |
| 1421992_a_at | 2.6 | Igfbp4                     | insulin-like growth factor binding protein 4                                                                |
| 1423389_at   | 2.6 | Smad7                      | MAD homolog 7 (Drosophila)                                                                                  |
| 1431035_at   | 2.6 | Daam1                      | dishevelled associated activator of morphogenesis 1                                                         |
| 1429556_at   | 2.6 | 2610024B07Rik              | RIKEN cDNA 2610024B07 gene                                                                                  |
|              |     | EG627245 /// EG666231 ///  |                                                                                                             |
|              |     | EG668343 /// LOC677259 /// | predicted gene, EG627245 /// predicted gene, EG666231 /// predicted gene, EG668343 /// similar to Ornithine |
| 1438761_a_at | 2.6 | Odc1                       | decarboxylase (ODC) /// ornithine decarboxylase, structural 1                                               |
| 1454655_at   | 2.6 | Dgkd                       | diacylglycerol kinase, delta                                                                                |
| 1418322_at   | 2.6 | Crem                       | cAMP responsive element modulator                                                                           |
| 1448932_at   | 2.6 | Krt16                      | keratin 16                                                                                                  |
| 1427128_at   | 2.6 | Ptpn23                     | protein tyrosine phosphatase, non-receptor type 23                                                          |
| 1435062_at   | 2.6 | 1500001A10Rik              | RIKEN cDNA 1500001A10 gene                                                                                  |
| 1449473_s_at | 2.6 | Cd40                       | CD40 antigen                                                                                                |
| 1425969_a_at | 2.6 | Htt                        | huntingtin                                                                                                  |
| 1424892_at   | 2.6 | Zkscan5                    | zinc finger with KRAB and SCAN domains 5                                                                    |
| 1419241_a_at | 2.6 | Aire                       | autoimmune regulator (autoimmune polyendocrinopathy candidiasis ectodermal dystrophy)                       |
| 1421045_at   | 2.5 | Mrc2                       | mannose receptor, C type 2                                                                                  |
| 1460556_at   | 2.5 | Micall1                    | microtubule associated monooxygenase, calponin and LIM domain containing -like 1                            |
| 1435240_at   | 2.5 | Baz2b                      | bromodomain adjacent to zinc finger domain, 2B                                                              |
| 1437696_at   | 2.5 | BC049807                   | cDNA sequence BC049807                                                                                      |
| 1422027_a_at | 2.5 | Ets1                       | E26 avian leukemia oncogene 1, 5' domain                                                                    |
| 1434687_at   | 2.5 | C730026J16                 | hypothetical protein C730026J16                                                                             |
| 1424043_at   | 2.5 | Ppil4                      | peptidylprolyl isomerase (cyclophilin)-like 4                                                               |
| 1418872_at   | 2.5 | Abcb1b                     | ATP-binding cassette, sub-family B (MDR/TAP), member 1B                                                     |
| 1435091_at   | 2.5 | Zfp568                     | zinc finger protein 568                                                                                     |
| 1444086_at   | 2.5 | E030049G20Rik              | RIKEN cDNA E030049G20 gene                                                                                  |
| 1422054_a_at | 2.5 | Skil                       | SKI-like                                                                                                    |
| 1426725_s_at | 2.5 | Ets1                       | E26 avian leukemia oncogene 1, 5' domain                                                                    |
| 1426528_at   | 2.5 | Nrp2 /// Pard3b            | neuropilin 2 /// par-3 partitioning defective 3 homolog B (C. elegans)                                      |
| 1426928_at   | 2.5 | Ccdc93                     | coiled-coil domain containing 93                                                                            |
| 1435249_at   | 2.4 | Btaf1                      | BTAF1 RNA polymerase II, B-TFIIID transcription factor-associated, (Mot1 homolog, S. cerevisiae)            |
| 1451485_at   | 2.4 | 3300001P08Rik              | RIKEN cDNA 3300001P08 gene                                                                                  |
| 1424393_s_at | 2.4 | Adhfe1                     | alcohol dehydrogenase, iron containing, 1                                                                   |
| 1451496_at   | 2.4 | Mtss1                      | metastasis suppressor 1                                                                                     |
| 1418504_at   | 2.4 | Hspa9                      | heat shock protein 9                                                                                        |
| 1450474_at   | 2.4 | Serpinb9c                  | serine (or cysteine) peptidase inhibitor, clade B, member 9c                                                |
| 1434238_at   | 2.4 | Taf2                       | TAF2 RNA polymerase II, TATA box binding protein (TBP)-associated factor                                    |
| 1426806_at   | 2.4 | Obfc2a                     | oligonucleotide/oligosaccharide-binding fold containing 2A                                                  |
| 1424030_at   | 2.4 | Grl1 /// LOC100043996      | grainyhead-like 1 (Drosophila) /// similar to Grl1 protein                                                  |
| 1418375_at   | 2.4 | Mbd6                       | methyl-CpG binding domain protein 6                                                                         |
| 1434873_a_at | 2.4 | Centb1 /// LOC100045877    | centaurin, beta 1 /// similar to Centaurin, beta 1                                                          |
| 1438684_at   | 2.4 | Nuak1                      | NUAK family, SNF1-like kinase, 1                                                                            |
| 1436562_at   | 2.4 | Ddx58                      | DEAD (Asp-Glu-Ala-Asp) box polypeptide 58                                                                   |
| 1416225_at   | 2.4 | Adh1                       | alcohol dehydrogenase 1 (class I)                                                                           |
| 1421446_at   | 2.4 | Prkcc                      | protein kinase C, gamma                                                                                     |
| 1455104_at   | 2.3 | Mxd1                       | MAX dimerization protein 1                                                                                  |
| 1449217_at   | 2.3 | Casp8ap2                   | caspase 8 associated protein 2                                                                              |
| 1454923_at   | 2.3 | Iws1                       | IWS1 homolog (S. cerevisiae)                                                                                |
| 1435341_at   | 2.3 | Ppig                       | peptidyl-prolyl isomerase G (cyclophilin G)                                                                 |
| 1420361_at   | 2.3 | Slc11a1                    | solute carrier family 11 (proton-coupled divalent metal ion transporters), member 1                         |
| 1428493_at   | 2.3 | Sipa113                    | signal-induced proliferation-associated 1 like 3                                                            |
| 1444402_at   | 2.3 | Zc3h12c                    | zinc finger CCCH type containing 12C                                                                        |
| 1426421_s_at | 2.3 | Rbm26                      | RNA binding motif protein 26                                                                                |
| 1419208_at   | 2.3 | Map3k8                     | mitogen-activated protein kinase kinase kinase 8                                                            |
| 1434746_at   | 2.3 | Mga                        | MAX gene associated                                                                                         |
| 1418960_at   | 2.3 | Phf2011                    | PHD finger protein 20-like 1                                                                                |
| 1416274_at   | 2.3 | Ctns                       | cystinosis, nephropathic                                                                                    |
| 1418305_s_at | 2.3 | Gar1                       | GAR1 ribonucleoprotein homolog (yeast)                                                                      |
| 1448135_at   | 2.3 | Atf4                       | activating transcription factor 4                                                                           |
| 1419380_at   | 2.3 | Zfp423                     | zinc finger protein 423                                                                                     |
| 1442038_at   | 2.3 | Rbm26                      | RNA binding motif protein 26                                                                                |
| 1434832_at   | 2.3 | Foxo3                      | forkhead box O3                                                                                             |
| 1429907_at   | 2.3 | 1700094D03Rik              | RIKEN cDNA 1700094D03 gene                                                                                  |
| 1455241_at   | 2.3 | BC037703                   | cDNA sequence BC037703                                                                                      |
| 1460369_at   | 2.3 | BC003267                   | cDNA sequence BC003267                                                                                      |
| 1455308_at   | 2.2 | Ano6                       | anoctamin 6                                                                                                 |
| 1420331_at   | 2.2 | Clec4e                     | C-type lectin domain family 4, member e                                                                     |
| 1438405_at   | 2.2 | Fgf7                       | fibroblast growth factor 7                                                                                  |
| 1426361_at   | 2.2 | Zc3h11a                    | zinc finger CCCH type containing 11A                                                                        |
| 1460315_s_at | 2.2 | Tbk1                       | TANK-binding kinase 1                                                                                       |

|              |     |                                 |                                                                                                                                       |
|--------------|-----|---------------------------------|---------------------------------------------------------------------------------------------------------------------------------------|
| 1419148_at   | 2.2 | Avil                            | advillin                                                                                                                              |
| 1437730_at   | 2.2 | Ppp2r2a                         | protein phosphatase 2 (formerly 2A), regulatory subunit B (PR 52), alpha isoform                                                      |
| 1440686_at   | 2.2 | LOC100048538 /// Prss27         | similar to protease, serine 27 /// protease, serine 27                                                                                |
| 1451959_a_at | 2.2 | Vegfa                           | vascular endothelial growth factor A                                                                                                  |
| 1429400_at   | 2.2 | Clcn5                           | chloride channel 5                                                                                                                    |
| 1452858_at   | 2.2 | Elavl1                          | ELAV (embryonic lethal, abnormal vision, Drosophila)-like 1 (Hu antigen R)                                                            |
| 1417249_at   | 2.2 | Polm                            | polymerase (DNA directed), mu                                                                                                         |
| 1425686_at   | 2.2 | Cflar                           | CASP8 and FADD-like apoptosis regulator                                                                                               |
| 1455187_at   | 2.2 | LOC638050 /// Zbtb40            | similar to zinc finger and BTB domain containing 40 /// zinc finger and BTB domain containing 40                                      |
| 1456865_x_at | 2.2 | Rrs1                            | RRS1 ribosome biogenesis regulator homolog (S. cerevisiae)                                                                            |
| 1438045_at   | 2.2 | Eea1                            | early endosome antigen 1                                                                                                              |
| 1416419_s_at | 2.2 | Gabarapl1                       | gamma-aminobutyric acid (GABA(A)) receptor-associated protein-like 1                                                                  |
| 1458148_at   | 2.2 | Nlrc3                           | NLR family, CARD domain containing 3                                                                                                  |
| 1438967_x_at | 2.2 | Amhr2                           | anti-Mullerian hormone type 2 receptor                                                                                                |
| 1452257_at   | 2.2 | Bdh1                            | 3-hydroxybutyrate dehydrogenase, type 1                                                                                               |
| 1450711_at   | 2.2 | Brd4                            | bromodomain containing 4                                                                                                              |
| 1434513_at   | 2.2 | Atp13a3                         | ATPase type 13A3                                                                                                                      |
| 1418661_at   | 2.2 | Abhd2                           | abhydrolase domain containing 2                                                                                                       |
| 1424632_a_at | 2.2 | Rev3l                           | REV3-like, catalytic subunit of DNA polymerase zeta RAD54 like (S. cerevisiae)                                                        |
| 1435007_s_at | 2.2 | Al132487                        | expressed sequence Al132487                                                                                                           |
| 1435904_at   | 2.2 | Eif2c3                          | eukaryotic translation initiation factor 2C, 3                                                                                        |
| 1455239_at   | 2.2 | 6330512M04Rik                   | RIKEN cDNA 6330512M04 gene                                                                                                            |
| 1437495_at   | 2.2 | LOC100047187 /// Mbtps2 /// Yy2 | similar to zinc finger, X-linked, duplicated B /// membrane-bound transcription factor peptidase, site 2 /// Yy2 transcription factor |
| 1434092_at   | 2.2 | Atg9b                           | ATG9 autophagy related 9 homolog B (S. cerevisiae)                                                                                    |
| 1432129_a_at | 2.2 | Prrx1                           | paired related homeobox 1                                                                                                             |
| 1453775_at   | 2.2 | 4921505C17Rik                   | RIKEN cDNA 4921505C17 gene                                                                                                            |
| 1435039_a_at | 2.1 | Pip5k1a                         | phosphatidylinositol-4-phosphate 5-kinase, type 1 alpha                                                                               |
| 1440615_at   | 2.1 | Dusp16                          | dual specificity phosphatase 16                                                                                                       |
| 1416187_s_at | 2.1 | Pnrc2                           | proline-rich nuclear receptor coactivator 2                                                                                           |
| 1455269_a_at | 2.1 | Coro1a                          | coronin, actin binding protein 1A                                                                                                     |
| 1435596_at   | 2.1 | Pion                            | pigeon homolog (Drosophila)                                                                                                           |
| 1417671_at   | 2.1 | Scly                            | selenocysteine lyase                                                                                                                  |
| 1456389_at   | 2.1 | Zeb2                            | zinc finger E-box binding homeobox 2                                                                                                  |
| 1424250_a_at | 2.1 | Arhgef3                         | Rho guanine nucleotide exchange factor (GEF) 3                                                                                        |
| 1453202_at   | 2.1 | E330016A19Rik                   | RIKEN cDNA E330016A19 gene                                                                                                            |
| 1433523_at   | 2.1 | D930005D10Rik                   | RIKEN cDNA D930005D10 gene                                                                                                            |
| 1416998_at   | 2.1 | Rrs1                            | RRS1 ribosome biogenesis regulator homolog (S. cerevisiae)                                                                            |
| 1419169_at   | 2.1 | Mapk6                           | mitogen-activated protein kinase 6                                                                                                    |
| 1428366_at   | 2.1 | 1600027N09Rik                   | RIKEN cDNA 1600027N09 gene                                                                                                            |
| 1427484_at   | 2.1 | Erm15                           | echinoderm microtubule associated protein like 5                                                                                      |
| 1454774_at   | 2.1 | Zfp445                          | zinc finger protein 445                                                                                                               |
| 1444228_s_at | 2.1 | Herc2                           | hect (homologous to the E6-AP (UBE3A) carboxyl terminus) domain and RCC1 (CHC1)-like domain (RLD) 2                                   |
| 1434080_at   | 2.1 | Aebp2                           | AE binding protein 2                                                                                                                  |
| 1434364_at   | 2.1 | Map3k14                         | mitogen-activated protein kinase kinase kinase 14                                                                                     |
| 1437635_at   | 2.1 | Dcblid2                         | discoidin, CUB and LCCL domain containing 2                                                                                           |
| 1425774_at   | 2.1 | 1500001A10Rik                   | RIKEN cDNA 1500001A10 gene                                                                                                            |
| 1436651_at   | 2.1 | Prdm11                          | PR domain containing 11                                                                                                               |
| 1420394_s_at | 2.0 | Gp49a /// Il1rb4                | glycoprotein 49 A /// leukocyte immunoglobulin-like receptor, subfamily B, member 4                                                   |
| 1437851_x_at | 2.0 | Rnps1                           | ribonucleic acid binding protein S1                                                                                                   |
| 1455309_at   | 2.0 | Ano6                            | anoctamin 6                                                                                                                           |
| 1455430_at   | 2.0 | Prr8                            | proline rich 8                                                                                                                        |
| 1453038_at   | 2.0 | 4930422G04Rik                   | RIKEN cDNA 4930422G04 gene                                                                                                            |
| 1435732_x_at | 2.0 | Atp6v0c /// Atp6v0c-ps2         | ATPase, H+ transporting, lysosomal V0 subunit C /// ATPase, H+ transporting, lysosomal V0 subunit C, pseudogene 2                     |
| 1416072_at   | 2.0 | Cd34                            | CD34 antigen                                                                                                                          |
| 1419354_at   | 2.0 | Klf7                            | Kruppel-like factor 7 (ubiquitous)                                                                                                    |
| 1450703_at   | 2.0 | Slc7a2                          | solute carrier family 7 (cationic amino acid transporter, y+ system), member 2                                                        |
| 1444226_at   | 2.0 | Foxo3                           | forkhead box O3                                                                                                                       |
| 1457473_at   | 2.0 | Chd1                            | chromodomain helicase DNA binding protein 1                                                                                           |
| 1425125_at   | 2.0 | Oit3                            | oncprotein induced transcript 3                                                                                                       |
| 1417964_at   | 2.0 | Ap3d1                           | adaptor-related protein complex 3, delta 1 subunit                                                                                    |
| 1456422_at   | 2.0 | Dennd5b                         | DENN/MADD domain containing 5B                                                                                                        |
| 1450651_at   | 2.0 | Myo10                           | myosin X                                                                                                                              |
| 1449061_a_at | 2.0 | Prim1                           | DNA primase, p49 subunit                                                                                                              |
| 1420296_at   | 2.0 | Clcn5                           | Chloride channel 5, mRNA (cDNA clone MGC:35965 IMAGE:3989812)                                                                         |
| 1438925_x_at | 2.0 | Atp6v0c /// Atp6v0c-ps2         | ATPase, H+ transporting, lysosomal V0 subunit C /// ATPase, H+ transporting, lysosomal V0 subunit C, pseudogene 2                     |
| 1448681_at   | 2.0 | Il15ra                          | interleukin 15 receptor, alpha chain                                                                                                  |
| 1423799_at   | 2.0 | Eif1                            | eukaryotic translation initiation factor 1                                                                                            |
| 1426083_a_at | 2.0 | Btg1 /// LOC100047353           | B-cell translocation gene 1, anti-proliferative /// similar to myocardial vascular inhibition factor                                  |
| 1421219_at   | 2.0 | Til13                           | tubulin tyrosine ligase-like family, member 3                                                                                         |
| 1422469_at   | 1.9 | Tbk1                            | TANK-binding kinase 1                                                                                                                 |
| 1455295_at   | 1.9 | Slc38a7                         | solute carrier family 38, member 7                                                                                                    |
| 1427322_at   | 1.9 | Brwd1                           | bromodomain and WD repeat domain containing 1                                                                                         |
| 1419400_at   | 1.9 | Mtp                             | microsomal triglyceride transfer protein                                                                                              |
| 1454914_at   | 1.9 | 2610101N10Rik                   | RIKEN cDNA 2610101N10 gene                                                                                                            |
| 1455110_at   | 1.9 | Gabpb2                          | GA repeat binding protein, beta 2                                                                                                     |
| 1440868_at   | 1.9 | Gabpb2                          | GA repeat binding protein, beta 2                                                                                                     |
| 1460323_at   | 1.9 | Tars                            | threonyl-tRNA synthetase                                                                                                              |
| 1443954_at   | 1.9 | Rad18                           | RAD18 homolog (S. cerevisiae), mRNA (cDNA clone MGC:19000 IMAGE:4014013)                                                              |
| 1437152_at   | 1.9 | Mex3b                           | mex3 homolog B (C. elegans)                                                                                                           |
| 1434298_at   | 1.9 | Zeb2                            | zinc finger E-box binding homeobox 2                                                                                                  |
| 1422945_a_at | 1.9 | Kif5c                           | kinesin family member 5C                                                                                                              |
| 1438081_at   | 1.9 | Mcc                             | mutated in colorectal cancers                                                                                                         |
| 1440645_at   | 1.9 | BB114814                        | expressed sequence BB114814                                                                                                           |

|              |     |                          |                                                                                                                                                                               |
|--------------|-----|--------------------------|-------------------------------------------------------------------------------------------------------------------------------------------------------------------------------|
| 1448838_at   | 1.9 | Topors                   | topoisomerase I binding, arginine/serine-rich                                                                                                                                 |
| 1423309_at   | 1.9 | Tgln1                    | trans-golgi network protein                                                                                                                                                   |
| 1433697_at   | 1.9 | Pat1                     | protein associated with topoisomerase II homolog 1 (yeast)                                                                                                                    |
| 1445576_at   | 1.9 | Rsph10b2                 | radial spoke head 10 homolog B (Chlamydomonas)                                                                                                                                |
| 1455549_at   | 1.9 | Sestd1                   | SEC14 and spectrin domains 1                                                                                                                                                  |
| 1435434_at   | 1.9 | Braf                     | Braf transforming gene                                                                                                                                                        |
| 1416303_at   | 1.9 | Litaf                    | LPS-induced TN factor                                                                                                                                                         |
| 1417022_at   | 1.9 | Slc7a3                   | solute carrier family 7 (cationic amino acid transporter, y+ system), member 3                                                                                                |
| 1415881_at   | 1.9 | Ghitm                    | growth hormone inducible transmembrane protein                                                                                                                                |
| 1427120_at   | 1.9 | Zfp26                    | zinc finger protein 26                                                                                                                                                        |
| 1427285_s_at | 1.9 | Malat1                   | metastasis associated lung adenocarcinoma transcript 1 (non-coding RNA)                                                                                                       |
| 1455765_a_at | 1.9 | Abcc8                    | ATP-binding cassette, sub-family C (CFTR/MRP), member 8                                                                                                                       |
| 1436604_at   | 1.9 | Tll3                     | tubulin tyrosine ligase-like family, member 3                                                                                                                                 |
| 1457262_at   | 1.9 | Smg1                     | SMG1 homolog, phosphatidylinositol 3-kinase-related kinase (C. elegans)                                                                                                       |
| 1433599_at   | 1.8 | Baz1a                    | bromodomain adjacent to zinc finger domain 1A                                                                                                                                 |
| 1439983_a_at | 1.8 | Accn3                    | amiloride-sensitive cation channel 3                                                                                                                                          |
| 1429124_s_at | 1.8 | Rexo1                    | REX1, RNA exonuclease 1 homolog (S. cerevisiae)                                                                                                                               |
| 1440447_at   | 1.8 | Abhd2                    | abhydrolase domain containing 2                                                                                                                                               |
| 1456405_at   | 1.8 | Dido1                    | death inducer-obliterator 1                                                                                                                                                   |
| 1449705_x_at | 1.8 | LOC100045677 /// Mcm3    | similar to DNA replication licensing factor MCM3 (DNA polymerase alpha holoenzyme-associated protein P1) (P1-MCM3) /// minichromosome maintenance deficient 3 (S. cerevisiae) |
| 1451225_at   | 1.8 | Ptpn11                   | protein tyrosine phosphatase, non-receptor type 11                                                                                                                            |
| 1439501_at   | 1.8 | Cbara1                   | calcium binding atopy-related autoantigen 1                                                                                                                                   |
| 1455096_at   | 1.8 | Flrt2                    | fibronectin leucine rich transmembrane protein 2                                                                                                                              |
| 1436885_a_at | 1.8 | Cherp                    | calcium homeostasis endoplasmic reticulum protein                                                                                                                             |
| 1423798_a_at | 1.8 | Eif1                     | eukaryotic translation initiation factor 1                                                                                                                                    |
| 1424788_at   | 1.8 | Kri1                     | KRI1 homolog (S. cerevisiae)                                                                                                                                                  |
| 1454074_a_at | 1.8 | Rsrc2                    | arginine/serine-rich coiled-coil 2                                                                                                                                            |
| 1443664_s_at | 1.8 | Cd164I2                  | CD164 sialomucin-like 2                                                                                                                                                       |
| 1454982_at   | 1.8 | Arfgef2                  | ADP-ribosylation factor guanine nucleotide-exchange factor 2 (brefeldin A-inhibited)                                                                                          |
| 1424645_at   | 1.8 | Tnrc6c                   | trinucleotide repeat containing 6C                                                                                                                                            |
| 1437980_at   | 1.8 | 9130230N09Rik            | RIKEN cDNA 9130230N09 gene                                                                                                                                                    |
| 1437984_x_at | 1.8 | Bat1a                    | HLA-B-associated transcript 1A                                                                                                                                                |
| 1427970_at   | 1.8 | Zfp689                   | zinc finger protein 689                                                                                                                                                       |
| 1442726_s_at | 1.8 | AI845619                 | expressed sequence AI845619                                                                                                                                                   |
| 1442992_at   | 1.8 | 130004C03                | hypothetical LOC403343                                                                                                                                                        |
| 1429085_at   | 1.8 | Vezf1                    | vascular endothelial zinc finger 1                                                                                                                                            |
| 1420958_at   | 1.7 | Sys1                     | SYS1 Golgi-localized integral membrane protein homolog (S. cerevisiae)                                                                                                        |
| 1436174_at   | 1.7 | Atad2                    | ATPase family, AAA domain containing 2                                                                                                                                        |
| 1434005_at   | 1.7 | Rbms1                    | RNA binding motif, single stranded interacting protein 1                                                                                                                      |
| 1419558_at   | 1.7 | Mdm4                     | transformed mouse 3T3 cell double minute 4                                                                                                                                    |
| 1437646_at   | 1.7 | LOC631806 /// Znrf3      | similar to Goliath homolog precursor (Ring finger protein 130) (R-goliath) /// zinc and ring finger 3                                                                         |
| 1433944_at   | 1.7 | Hectd2                   | HECT domain containing 2                                                                                                                                                      |
| 1418007_at   | 1.7 | 1810007M14Rik            | RIKEN cDNA 1810007M14 gene                                                                                                                                                    |
| 1444021_at   | 1.7 | Sqstm1                   | sequestosome 1                                                                                                                                                                |
| 1433517_at   | 1.7 | Myeov2                   | myeloma overexpressed 2                                                                                                                                                       |
| 1453048_at   | 1.7 | Nhlrc2                   | NHL repeat containing 2                                                                                                                                                       |
| 1428682_at   | 1.7 | Zc3h6                    | zinc finger CCCH type containing 6                                                                                                                                            |
| 1443531_at   | 1.7 | A930005I04Rik            | RIKEN cDNA A930005I04 gene, mRNA (cDNA clone MGC:151305 IMAGE:40126247)                                                                                                       |
| 1432356_at   | 1.7 | 1700056N10Rik            | RIKEN cDNA 1700056N10 gene                                                                                                                                                    |
| 1460597_at   | 1.7 | Asxl2                    | additional sex combs like 2 (Drosophila)                                                                                                                                      |
| 1460318_at   | 1.7 | Csrp3                    | cysteine and glycine-rich protein 3                                                                                                                                           |
| 1458685_at   | 1.7 | Garnl1                   | GTPase activating RANGAP domain-like 1                                                                                                                                        |
| 1446337_at   | 1.7 | Htt                      | huntingtin                                                                                                                                                                    |
| 1457222_at   | 1.7 | Creb5                    | cAMP responsive element binding protein 5                                                                                                                                     |
| 1434824_at   | 1.7 | Baz1b                    | bromodomain adjacent to zinc finger domain, 1B                                                                                                                                |
| 1458163_at   | 1.7 | BC066028                 | cDNA sequence BC066028                                                                                                                                                        |
| 1434753_at   | 1.7 | Nfrkb                    | nuclear factor related to kappa B binding protein                                                                                                                             |
| 1459765_s_at | 1.7 | Sf1                      | splicing factor 1                                                                                                                                                             |
| 1455389_s_at | 1.7 | 2310051F07Rik            | RIKEN cDNA 2310051F07 gene                                                                                                                                                    |
| 1459622_at   | 1.7 | Gm22                     | gene model 22, (NCBI)                                                                                                                                                         |
| 1457059_at   | 1.7 | Zfp438                   | zinc finger protein 438                                                                                                                                                       |
| 1438606_a_at | 1.7 | Clic4                    | chloride intracellular channel 4 (mitochondrial)                                                                                                                              |
| 1441216_at   | 1.7 | St3gal1                  | ST3 beta-galactoside alpha-2,3-sialyltransferase 1                                                                                                                            |
| 1455261_at   | 1.7 | Luc7l                    | Luc7 homolog (S. cerevisiae)-like                                                                                                                                             |
| 1455943_at   | 1.7 | Zfp451                   | zinc finger protein 451                                                                                                                                                       |
| 1450314_at   | 1.7 | Dqx1                     | DEAQ RNA-dependent ATPase                                                                                                                                                     |
| 1419920_s_at | 1.7 | Usp7                     | ubiquitin specific peptidase 7                                                                                                                                                |
| 1430135_at   | 1.7 | Dnase2a                  | deoxyribonuclease II alpha                                                                                                                                                    |
| 1455668_at   | 1.6 | Whsc11                   | Wolf-Hirschhorn syndrome candidate 1-like 1 (human)                                                                                                                           |
| 1427411_s_at | 1.6 | Dleu2                    | deleted in lymphocytic leukemia, 2                                                                                                                                            |
| 1455148_at   | 1.6 | Tmem130                  | transmembrane protein 130                                                                                                                                                     |
| 1449158_at   | 1.6 | Kcnk2                    | potassium channel, subfamily K, member 2                                                                                                                                      |
| 1456844_at   | 1.6 | Camk2d                   | calcium/calmodulin-dependent protein kinase II, delta                                                                                                                         |
| 1427534_at   | 1.6 | 4930535I16Rik            | RIKEN cDNA 4930535I16 gene                                                                                                                                                    |
| 1427088_at   | 1.6 | Ccnt2                    | cyclin T2                                                                                                                                                                     |
| 1458087_at   | 1.6 | Stac3                    | SH3 and cysteine rich domain 3                                                                                                                                                |
| 1451567_a_at | 1.6 | Ifi203                   | interferon activated gene 203                                                                                                                                                 |
| 1417771_a_at | 1.6 | Psmc6                    | proteasome (prosome, macropain) 26S subunit, ATPase, 6                                                                                                                        |
| 1454944_at   | 1.6 | Hic2                     | hypermethylated in cancer 2                                                                                                                                                   |
| 1459815_at   | 1.6 | LOC100045751 /// Zmynd12 | similar to zinc finger, MYND domain containing 12 /// zinc finger, MYND domain containing 12                                                                                  |
| 1452614_at   | 1.5 | Bcl2l15                  | BCL2-like 15                                                                                                                                                                  |
| 1430594_at   | 1.5 | Rab11fip1                | RAB11 family interacting protein 1 (class I)                                                                                                                                  |
| 1439620_at   | 1.5 | Car13                    | carbonic anhydrase 13                                                                                                                                                         |
| 1452243_at   | 1.5 | Kcnj14                   | potassium inwardly-rectifying channel, subfamily J, member 14                                                                                                                 |
| 1441409_at   | 1.5 | BC030307                 | cDNA sequence BC030307                                                                                                                                                        |

|              |      |                             |                                                                                                                  |
|--------------|------|-----------------------------|------------------------------------------------------------------------------------------------------------------|
| 1437779_at   | 1.5  | Foxh1                       | forkhead box H1                                                                                                  |
| 1437304_at   | 1.5  | Cblb                        | Casitas B-lineage lymphoma b                                                                                     |
| 1433910_at   | 1.5  | Zcchc6                      | zinc finger, CCHC domain containing 6                                                                            |
| 1433450_at   | 1.5  | Cdk5r1                      | cyclin-dependent kinase 5, regulatory subunit 1 (p35)                                                            |
| 1450611_at   | 1.5  | Orm3                        | orosomucoid 3                                                                                                    |
| 1460042_at   | 1.5  | Slc23a3                     | solute carrier family 23 (nucleobase transporters), member 3                                                     |
| 1415730_at   | 1.5  | 573045316Rik                | RIKEN cDNA 573045316 gene                                                                                        |
| 1455675_a_at | 1.5  | Tial1                       | Tia1 cytotoxic granule-associated RNA binding protein-like 1                                                     |
| 1455502_at   | 1.5  | Madd                        | MAP-kinase activating death domain                                                                               |
| 1436454_x_at | 1.5  | Fen1                        | flap structure specific endonuclease 1                                                                           |
| 1455676_x_at | 1.5  | Tial1                       | Tia1 cytotoxic granule-associated RNA binding protein-like 1                                                     |
| 1453334_at   | 1.5  | B230216N24Rik               | RIKEN cDNA B230216N24 gene                                                                                       |
| 1434082_at   | 1.5  | Pctk2                       | PCTAIRE-motif protein kinase 2                                                                                   |
| 1446509_at   | 1.5  | Smox                        | spermine oxidase                                                                                                 |
| 1452091_a_at | 1.4  | Rbm28                       | RNA binding motif protein 28                                                                                     |
| 1444419_at   | 1.4  | LOC100048394 /// Prcp       | hypothetical protein LOC100048394 /// prolylcarboxypeptidase (angiotensinase C)                                  |
| 1457900_at   | 1.4  | Asc3                        | activating signal cointegrator 1 complex subunit 3                                                               |
| 1433933_s_at | 1.4  | Slco2b1                     | solute carrier organic anion transporter family, member 2b1                                                      |
| 1444023_at   | 1.4  | Ank2                        | ankyrin 2, brain                                                                                                 |
| 1441039_at   | 1.4  | 4930532J02Rik               | RIKEN cDNA 4930532J02 gene                                                                                       |
|              |      | H3f3a /// H3f3b ///         |                                                                                                                  |
| 1455725_a_at | 1.4  | LOC100045490                | H3 histone, family 3A /// H3 histone, family 3B /// similar to H3 histone, family 3A                             |
| 1456052_at   | 1.4  | Cdk13                       | cyclin-dependent kinase-like 3                                                                                   |
| 1454200_at   | 1.4  | Zeb2                        | zinc finger E-box binding homeobox 2                                                                             |
| 1439618_at   | 1.3  | Pde10a                      | phosphodiesterase 10A                                                                                            |
| 1431180_at   | 1.3  | Zfp433                      | RIKEN cDNA 1700123A16 gene                                                                                       |
| 1448641_at   | 1.3  | Mbtd1                       | mbt domain containing 1                                                                                          |
| 1428611_at   | 1.3  | Atg7                        | autophagy-related 7 (yeast)                                                                                      |
| 1447997_s_at | 1.2  | Timm8a2                     | translocase of inner mitochondrial membrane 8 homolog a2 (yeast)                                                 |
|              |      | LOC100046668 ///            |                                                                                                                  |
|              |      | OTTMUSG00000022083 ///      | similar to yeast ribosomal protein S28 homologue /// predicted gene, OTTMUSG00000022083 /// ribosomal            |
| 1460175_at   | -1.3 | Rps23                       | protein S23                                                                                                      |
| 1456497_x_at | -1.3 | Rps10                       | ribosomal protein S10                                                                                            |
| 1438723_a_at | -1.3 | Rps10                       | ribosomal protein S10                                                                                            |
| 1456308_x_at | -1.4 | Trim28                      | tripartite motif-containing 28                                                                                   |
|              |      | ENSMUSG00000045799 ///      |                                                                                                                  |
| 1423455_at   | -1.4 | Ptma                        | predicted gene, ENSMUSG00000045799 /// prothymosin alpha                                                         |
| 1424000_a_at | -1.4 | Rps11                       | ribosomal protein S11                                                                                            |
| 1416054_at   | -1.4 | Rps5                        | ribosomal protein S5                                                                                             |
| 1435151_a_at | -1.4 | Rps3                        | ribosomal protein S3                                                                                             |
| 1415701_x_at | -1.4 | Rpl23                       | ribosomal protein L23                                                                                            |
| 1452167_at   | -1.4 | 2810407C02Rik               | RIKEN cDNA 2810407C02 gene                                                                                       |
| 1434588_x_at | -1.4 | EG620313 /// Tbca           | predicted gene, EG620313 /// tubulin cofactor a                                                                  |
| 1453467_s_at | -1.4 | Rps15a                      | ribosomal protein S15a                                                                                           |
| 1439443_x_at | -1.4 | Tkt                         | transketolase                                                                                                    |
| 1439069_a_at | -1.4 | 4933439C20Rik               | RIKEN cDNA 4933439C20 gene                                                                                       |
| 1415979_x_at | -1.4 | Rpl7                        | ribosomal protein L7                                                                                             |
| 1455578_x_at | -1.5 | Rpl41                       | ribosomal protein L41                                                                                            |
| 1416089_at   | -1.5 | Rps15                       | ribosomal protein S15                                                                                            |
| 1430123_a_at | -1.5 | Akr1a4                      | aldo-keto reductase family 1, member A4 (aldehyde reductase)                                                     |
|              |      | EG667682 ///                |                                                                                                                  |
|              |      | ENSMUSG00000066956 ///      | predicted gene, EG667682 /// predicted gene, ENSMUSG00000066956 /// ERO1-like (S. cerevisiae) ///                |
| 1460008_x_at | -1.5 | Ero11 /// Rpl31             | ribosomal protein L31                                                                                            |
|              |      | 100041509 ///               |                                                                                                                  |
|              |      | ENSMUSG00000058443 ///      |                                                                                                                  |
|              |      | LOC100048223 ///            |                                                                                                                  |
|              |      | LOC100048462 ///            |                                                                                                                  |
|              |      | OTTMUSG00000015005 ///      | predicted gene, 100041509 /// predicted gene, ENSMUSG00000058443 /// similar to QM protein /// similar to        |
| 1448157_s_at | -1.5 | Rpl10                       | QM protein /// predicted gene, OTTMUSG00000015005 /// ribosomal protein 10                                       |
| 1423429_at   | -1.5 | Rhox5                       | reproductive homeobox 5                                                                                          |
| 1416300_a_at | -1.5 | Slc25a3                     | solute carrier family 25 (mitochondrial carrier, phosphate carrier), member 3                                    |
| 1419441_at   | -1.5 | Rplp0                       | ribosomal protein, large, P0                                                                                     |
| 1452984_at   | -1.5 | LOC100044842                | similar to cyclin fold protein 1                                                                                 |
| 1422623_x_at | -1.5 | Rpl41                       | ribosomal protein L41                                                                                            |
|              |      | 100041163 /// 100041478 /// |                                                                                                                  |
|              |      | ENSMUSG00000063556 ///      |                                                                                                                  |
|              |      | ENSMUSG00000071532 ///      | predicted gene, 100041163 /// predicted gene, 100041478 /// predicted gene, ENSMUSG00000063556 ///               |
| 1426660_x_at | -1.5 | LOC100046821 /// Rpl23a     | predicted gene, ENSMUSG00000071532 /// similar to ribosomal protein L23a /// ribosomal protein L23a              |
|              |      | EG665562 /// EG667682 ///   |                                                                                                                  |
|              |      | EG668850 ///                |                                                                                                                  |
|              |      | ENSMUSG00000066956 ///      |                                                                                                                  |
|              |      | Ero11 /// LOC638399 ///     | predicted gene, EG665562 /// predicted gene, EG667682 /// predicted gene, EG668850 /// predicted gene,           |
|              |      | LOC673582 /// LOC675018     | ENSMUSG00000066956 /// ERO1-like (S. cerevisiae) /// similar to ribosomal protein L31 /// similar to ribosomal   |
|              |      | /// OTTMUSG00000009823      | /// similar to ribosomal protein L31 /// predicted gene, OTTMUSG00000009823 /// ribosomal protein                |
|              |      | /// Rpl31                   | L31                                                                                                              |
| 1436924_x_at | -1.5 | Bub1b                       | budding uninhibited by benzimidazoles 1 homolog, beta (S. cerevisiae)                                            |
| 1447363_s_at | -1.5 | Timp2                       | tissue inhibitor of metalloproteinase 2                                                                          |
| 1460287_at   | -1.5 | LOC100039355 /// Rps16      | similar to Rps16 protein /// ribosomal protein S16                                                               |
| 1416404_s_at | -1.5 | Sec61a1                     | Sec61 alpha 1 subunit (S. cerevisiae)                                                                            |
| 1448242_at   | -1.5 | Nos1                        | nitric oxide synthase 1, neuronal                                                                                |
| 1429887_at   | -1.6 | Anapc5                      | anaphase-promoting complex subunit 5                                                                             |
| 1433822_x_at | -1.6 | EG665562 /// EG667682 ///   |                                                                                                                  |
|              |      | ENSMUSG00000066956 ///      | predicted gene, EG665562 /// predicted gene, EG667682 /// predicted gene, ENSMUSG00000066956 /// similar         |
|              |      | LOC638399 /// LOC673582     | to ribosomal protein L31 /// similar to ribosomal protein L31 /// similar to ribosomal protein L31 /// ribosomal |
| 1428212_x_at | -1.6 | /// LOC675018 /// Rpl31     | protein L31                                                                                                      |
| 1416415_a_at | -1.6 | H2afz                       | H2A histone family, member Z                                                                                     |

|              |      |                             |                                                                                                                                                                                                                                  |
|--------------|------|-----------------------------|----------------------------------------------------------------------------------------------------------------------------------------------------------------------------------------------------------------------------------|
| 1436883_at   | -1.6 | Mbtps2                      | membrane-bound transcription factor peptidase, site 2                                                                                                                                                                            |
| 1433645_at   | -1.6 | Slc44a1                     | solute carrier family 44, member 1                                                                                                                                                                                               |
| 1448252_a_at | -1.6 | Eef1b2                      | eukaryotic translation elongation factor 1 beta 2                                                                                                                                                                                |
| 1417451_a_at | -1.6 | Ppia                        | peptidylprolyl isomerase A                                                                                                                                                                                                       |
| 1441866_s_at | -1.6 | LOC674712 /// Ptdss1        | similar to phosphatidylserine synthase 1 /// phosphatidylserine synthase 1                                                                                                                                                       |
| 1426904_s_at | -1.6 | Dnajc10 /// LOC100047007    | DnaJ (Hsp40) homolog, subfamily C, member 10 /// similar to DnaJ (Hsp40) homolog, subfamily C, member 10                                                                                                                         |
| 1448322_a_at | -1.6 | Cox4i1                      | cytochrome c oxidase subunit IV isoform 1                                                                                                                                                                                        |
|              |      | OTTMUSG00000016246 ///      |                                                                                                                                                                                                                                  |
| 1415833_x_at | -1.6 | Rps29                       | predicted gene, OTTMUSG00000016246 /// ribosomal protein S29                                                                                                                                                                     |
|              |      |                             | potassium voltage gated channel, Shab-related subfamily, member 1 /// protein kinase C and casein kinase substrate in neurons 2                                                                                                  |
| 1417810_a_at | -1.6 | Kcnb1 /// Pacsin2           |                                                                                                                                                                                                                                  |
| 1460680_a_at | -1.6 | LOC100044627 /// Rpl23      | similar to HL23 ribosomal protein /// ribosomal protein L23                                                                                                                                                                      |
| 1455019_x_at | -1.6 | Ckap4                       | cytoskeleton-associated protein 4                                                                                                                                                                                                |
| 1417323_at   | -1.6 | Psrc1                       | proline/serine-rich coiled-coil 1                                                                                                                                                                                                |
| 1435910_at   | -1.6 | Fads3                       | fatty acid desaturase 3                                                                                                                                                                                                          |
| 1420880_a_at | -1.7 | Ywhab                       | tyrosine 3-monooxygenase/tryptophan 5-monooxygenase activation protein, beta polypeptide                                                                                                                                         |
| 1453034_at   | -1.7 | Zfp251                      | zinc finger protein 251                                                                                                                                                                                                          |
| 1436079_s_at | -1.7 | Vapb                        | vesicle-associated membrane protein, associated protein B and C                                                                                                                                                                  |
| 1437389_x_at | -1.7 | Khdrbs1                     | KH domain containing, RNA binding, signal transduction associated 1                                                                                                                                                              |
|              |      | 100041163 /// 100041478 /// |                                                                                                                                                                                                                                  |
|              |      | ENSMUSG00000063556 ///      | predicted gene, 100041163 /// predicted gene, 100041478 /// predicted gene, ENSMUSG00000063556 ///                                                                                                                               |
| 1426659_a_at | -1.7 | LOC100046821 /// Rpl23a     | similar to ribosomal protein L23a /// ribosomal protein L23a                                                                                                                                                                     |
| 1415821_at   | -1.7 | Nptn                        | neuroplastin                                                                                                                                                                                                                     |
| 1456128_at   | -1.7 | Atp5g2                      | ATP synthase, H+ transporting, mitochondrial F0 complex, subunit c (subunit 9), isoform 2                                                                                                                                        |
| 1448504_a_at | -1.7 | Cbx3 /// LOC633016          | chromobox homolog 3 (Drosophila HP1 gamma) /// similar to chromobox homolog 3                                                                                                                                                    |
| 1453729_a_at | -1.7 | Rpl37                       | ribosomal protein L37                                                                                                                                                                                                            |
| 1430288_x_at | -1.7 | Rps21                       | ribosomal protein S21                                                                                                                                                                                                            |
| 1428152_a_at | -1.7 | Rpl18a                      | ribosomal protein L18A                                                                                                                                                                                                           |
| 1434731_x_at | -1.7 | Prdx1                       | peroxiredoxin 1                                                                                                                                                                                                                  |
| 1451002_at   | -1.7 | Aco2                        | aconitase 2, mitochondrial                                                                                                                                                                                                       |
| 1452830_s_at | -1.7 | Cad                         | carbamoyl-phosphate synthetase 2, aspartate transcarbamylase, and dihydroorotase                                                                                                                                                 |
| 1416539_at   | -1.7 | Siae                        | sialic acid acetyltransferase                                                                                                                                                                                                    |
| 1439394_x_at | -1.7 | Cdc20                       | cell division cycle 20 homolog (S. cerevisiae)                                                                                                                                                                                   |
| 1428884_at   | -1.7 | Tmem57                      | transmembrane protein 57                                                                                                                                                                                                         |
|              |      | 4933439C20Rik ///           | RIKEN cDNA 4933439C20 gene /// phosphatidylserine decarboxylase pseudogene /// phosphatidylserine decarboxylase                                                                                                                  |
| 1426387_x_at | -1.7 | LOC236604 /// Pisd          |                                                                                                                                                                                                                                  |
| 1426809_at   | -1.8 | C430004E15Rik               | RIKEN cDNA C430004E15 gene                                                                                                                                                                                                       |
|              |      | 100038991 /// 100043296 /// |                                                                                                                                                                                                                                  |
|              |      | ENSMUSG00000069439 ///      | predicted gene, 100038991 /// predicted gene, 100043296 /// predicted gene, ENSMUSG00000069439 ///                                                                                                                               |
| 1416243_a_at | -1.8 | Rpl35                       | ribosomal protein L35                                                                                                                                                                                                            |
| 1437393_at   | -1.8 | Prkca                       | protein kinase C, alpha                                                                                                                                                                                                          |
| 1439060_s_at | -1.8 | Wipi1                       | WD repeat domain, phosphoinositide interacting 1                                                                                                                                                                                 |
| 1415741_at   | -1.8 | Tmem165                     | transmembrane protein 165                                                                                                                                                                                                        |
| 1416996_at   | -1.8 | Tbc1d8                      | TBC1 domain family, member 8                                                                                                                                                                                                     |
|              |      | EG668144 ///                |                                                                                                                                                                                                                                  |
|              |      | ENSMUSG00000062611 ///      |                                                                                                                                                                                                                                  |
| 1422475_a_at | -1.8 | Rps3a                       | predicted gene, EG668144 /// predicted gene, ENSMUSG00000062611 /// ribosomal protein S3a                                                                                                                                        |
|              |      | 100041163 /// 100042634 /// |                                                                                                                                                                                                                                  |
|              |      | EG385336 /// EG664936 ///   |                                                                                                                                                                                                                                  |
|              |      | EG666548 ///                |                                                                                                                                                                                                                                  |
|              |      | ENSMUSG00000063556 ///      | predicted gene, 100041163 /// predicted gene, 100042634 /// predicted gene, EG385336 /// predicted gene, EG664936 /// predicted gene, EG666548 /// predicted gene, ENSMUSG00000063556 /// predicted gene, ENSMUSG00000071532 /// |
|              |      | LOC100042058 ///            | ENSMUSG00000071532 /// similar to ribosomal protein L23a /// similar to ribosomal protein L23a /// ribosomal protein L23a                                                                                                        |
| 1437975_a_at | -1.8 | LOC100046821 /// Rpl23a     |                                                                                                                                                                                                                                  |
| 1416276_a_at | -1.8 | Rps4x                       | ribosomal protein S4, X-linked                                                                                                                                                                                                   |
| 1448103_s_at | -1.8 | Nono                        | non-POU-domain-containing, octamer binding protein                                                                                                                                                                               |
| 1435612_at   | -1.8 | Opcml                       | opioid binding protein/cell adhesion molecule-like                                                                                                                                                                               |
| 1426576_at   | -1.8 | Sgms1                       | sphingomyelin synthase 1                                                                                                                                                                                                         |
| 1416546_a_at | -1.8 | Rpl6                        | ribosomal protein L6                                                                                                                                                                                                             |
| 1424635_at   | -1.8 | Eef1a1                      | eukaryotic translation elongation factor 1 alpha 1                                                                                                                                                                               |
| 1416961_at   | -1.8 | Bub1b                       | budding uninhibited by benzimidazoles 1 homolog, beta (S. cerevisiae)                                                                                                                                                            |
| 1434091_at   | -1.8 | Faah                        | fatty acid amide hydrolase                                                                                                                                                                                                       |
| 1426680_at   | -1.8 | Sepr1                       | selenoprotein N, 1                                                                                                                                                                                                               |
| 1437159_at   | -1.8 | Glb1                        | galactosidase, beta 1                                                                                                                                                                                                            |
| 1436691_x_at | -1.8 | Prdx1                       | peroxiredoxin 1                                                                                                                                                                                                                  |
| 1455022_at   | -1.9 | Strn                        | striatin, calmodulin binding protein                                                                                                                                                                                             |
| 1417615_a_at | -1.9 | Rpl11                       | ribosomal protein L11                                                                                                                                                                                                            |
| 1449183_at   | -1.9 | Comt1                       | catechol-O-methyltransferase 1                                                                                                                                                                                                   |
| 1438159_x_at | -1.9 | Ndufv2                      | NADH dehydrogenase (ubiquinone) flavoprotein 2                                                                                                                                                                                   |
| 1456695_x_at | -1.9 | Anapc5                      | anaphase-promoting complex subunit 5                                                                                                                                                                                             |
| 1416105_at   | -1.9 | Nnt                         | nicotinamide nucleotide transhydrogenase                                                                                                                                                                                         |
| 1437807_x_at | -1.9 | Ctnna1                      | catenin (cadherin associated protein), alpha 1                                                                                                                                                                                   |
| 1448449_at   | -1.9 | Ripk3                       | receptor-interacting serine-threonine kinase 3                                                                                                                                                                                   |
| 1421870_at   | -1.9 | Trim44                      | tripartite motif-containing 44                                                                                                                                                                                                   |
| 1423677_at   | -1.9 | Fkbp9                       | FK506 binding protein 9                                                                                                                                                                                                          |
| 1435880_at   | -1.9 | Ankrd50                     | ankyrin repeat domain 50                                                                                                                                                                                                         |
| 1451516_at   | -1.9 | Rhebl1                      | Ras homolog enriched in brain like 1                                                                                                                                                                                             |
| 1426342_at   | -1.9 | Stt3b                       | STT3, subunit of the oligosaccharyltransferase complex, homolog B (S. cerevisiae)                                                                                                                                                |
| 1435178_x_at | -1.9 | Anapc5                      | anaphase-promoting complex subunit 5                                                                                                                                                                                             |
| 1436499_at   | -1.9 | Sgms1                       | sphingomyelin synthase 1                                                                                                                                                                                                         |
| 1424052_at   | -1.9 | Thap4                       | THAP domain containing 4                                                                                                                                                                                                         |
| 1417842_at   | -1.9 | Cam1                        | calcium modulating ligand                                                                                                                                                                                                        |
| 1460387_a_at | -1.9 | Siae                        | sialic acid acetyltransferase                                                                                                                                                                                                    |
| 1418101_a_at | -1.9 | Rtn3                        | reticulon 3                                                                                                                                                                                                                      |
|              |      | Gm1604A /// Gm1604b ///     |                                                                                                                                                                                                                                  |
| 1452734_at   | -1.9 | Rnaset2a /// Rnaset2b       | gene model 1604A, (NCBI) /// gene model 1604B, (NCBI) /// ribonuclease T2A /// ribonuclease T2B                                                                                                                                  |

|              |      |                            |                                                                                                                |
|--------------|------|----------------------------|----------------------------------------------------------------------------------------------------------------|
| 1451209_at   | -2.0 | Lass5                      | LAG1 homolog, ceramide synthase 5                                                                              |
| 1455164_at   | -2.0 | Cdgap                      | CDC42 GTPase-activating protein                                                                                |
| 1424005_at   | -2.0 | B230219D22Rik              | RIKEN cDNA B230219D22 gene                                                                                     |
| 1428600_at   | -2.0 | Nin                        | ninein                                                                                                         |
| 1424987_at   | -2.0 | 5430435G22Rik              | RIKEN cDNA 5430435G22 gene                                                                                     |
| 1422780_at   | -2.0 | Pxmp4                      | peroxisomal membrane protein 4                                                                                 |
| 1416058_s_at | -2.0 | Atp5c1                     | ATP synthase, H+ transporting, mitochondrial F1 complex, gamma polypeptide 1                                   |
| 1423680_at   | -2.0 | Fads1                      | fatty acid desaturase 1                                                                                        |
| 1421375_a_at | -2.0 | S100a6                     | S100 calcium binding protein A6 (calcyclin)                                                                    |
| 1456475_s_at | -2.0 | Prkar2b                    | protein kinase, cAMP dependent regulatory, type II beta                                                        |
| 1423030_at   | -2.0 | Vcp                        | valosin containing protein                                                                                     |
| 1450686_at   | -2.0 | Pon2                       | paraoxonase 2                                                                                                  |
| 1423071_x_at | -2.0 | 6720475J19Rik              | RIKEN cDNA 6720475J19 gene                                                                                     |
| 1451015_at   | -2.0 | Tkt                        | transketolase                                                                                                  |
| 1416836_at   | -2.0 | Lrp10                      | low-density lipoprotein receptor-related protein 10                                                            |
| 1429019_s_at | -2.0 | Pon2                       | paraoxonase 2                                                                                                  |
| 1418066_at   | -2.0 | Cfil2                      | cofilin 2, muscle                                                                                              |
| 1452147_at   | -2.0 | Sec24c                     | Sec24 related gene family, member C (S. cerevisiae)                                                            |
| 1434897_a_at | -2.0 | Slc25a4                    | solute carrier family 25 (mitochondrial carrier, adenine nucleotide translocator), member 4                    |
| 1455350_at   | -2.0 | Tmem62                     | transmembrane protein 62                                                                                       |
| 1435074_at   | -2.0 | Tmem106b                   | transmembrane protein 106B                                                                                     |
| 1433805_at   | -2.0 | Jak1                       | Janus kinase 1                                                                                                 |
| 1435157_at   | -2.0 | Hook3                      | hook homolog 3 (Drosophila)                                                                                    |
| 1448526_at   | -2.0 | Kpnb1                      | karyopherin (importin) beta 1                                                                                  |
| 1416119_at   | -2.0 | Txn1                       | thioredoxin 1                                                                                                  |
| 1448149_at   | -2.1 | Ctnna1                     | catenin (cadherin associated protein), alpha 1                                                                 |
| 1437185_s_at | -2.1 | ENSMUSG00000050347 ///     | predicted gene, ENSMUSG00000050347 /// similar to thymosin, beta 10 /// thymosin, beta 10                      |
| 1422747_at   | -2.1 | LOC100048142 /// Tmsb10    | CHK2 checkpoint homolog (S. pombe)                                                                             |
| 1427049_s_at | -2.1 | Chek2                      | CHK2 checkpoint homolog (S. pombe)                                                                             |
| 1429304_at   | -2.1 | Smo                        | smoothened homolog (Drosophila)                                                                                |
| 1428270_at   | -2.1 | Ankrd10                    | ankyrin repeat domain 10                                                                                       |
| 1415751_at   | -2.1 | Git8d1                     | glycosyltransferase 8 domain containing 1                                                                      |
| 1428382_at   | -2.1 | Hp1bp3                     | heterochromatin protein 1, binding protein 3                                                                   |
| 1428103_at   | -2.1 | Smarcc2                    | SWI/SNF related, matrix associated, actin dependent regulator of chromatin, subfamily c, member 2              |
| 1426350_at   | -2.1 | Adam10                     | a disintegrin and metallopeptidase domain 10                                                                   |
| 1434383_at   | -2.1 | Mgat2                      | mannoside acetylglucosaminyltransferase 2                                                                      |
| 1428535_at   | -2.1 | Pja2                       | praja 2, RING-H2 motif containing                                                                              |
| 1448619_at   | -2.1 | 9430020K01Rik              | RIKEN cDNA 9430020K01 gene                                                                                     |
| 1434478_at   | -2.1 | Dhcr7                      | 7-dehydrocholesterol reductase                                                                                 |
| 1448474_at   | -2.1 | Heca                       | headcase homolog (Drosophila)                                                                                  |
| 1418506_a_at | -2.1 | Nek7                       | NIMA (never in mitosis gene a)-related expressed kinase 7                                                      |
| 1417028_a_at | -2.2 | Prdx2                      | peroxiredoxin 2                                                                                                |
| 1439184_s_at | -2.2 | Trim2                      | tripartite motif-containing 2                                                                                  |
|              |      | Txndc17                    | thioredoxin domain containing 17                                                                               |
|              |      | EG629732 /// LOC100042180  |                                                                                                                |
|              |      | /// LOC100048094 ///       |                                                                                                                |
|              |      | OTTMUSG00000000623 ///     |                                                                                                                |
|              |      | OTTMUSG00000016616 ///     | predicted gene, EG629732 /// ribosomal protein S8 pseudogene /// similar to ribosomal protein S8 /// predicted |
|              |      | OTTMUSG00000022847 ///     | gene, OTTMUSG00000000623 /// predicted gene, OTTMUSG00000016616 /// predicted gene,                            |
| 1436760_a_at | -2.2 | Rps8                       | OTTMUSG00000022847 /// ribosomal protein S8                                                                    |
| 1434395_at   | -2.2 | Man1a2                     | mannosidase, alpha, class 1A, member 2                                                                         |
| 1417090_at   | -2.2 | Rcn1                       | reticulocalbin 1                                                                                               |
| 1433779_at   | -2.2 | Casc4                      | cancer susceptibility candidate 4                                                                              |
| 1455419_at   | -2.2 | D630045J12Rik              | RIKEN cDNA D630045J12 gene                                                                                     |
| 1427048_at   | -2.2 | Smo                        | smoothened homolog (Drosophila)                                                                                |
| 1455220_at   | -2.2 | Frat2                      | frequently rearranged in advanced T-cell lymphomas 2                                                           |
| 1428412_at   | -2.2 | Tm9sf3                     | transmembrane 9 superfamily member 3                                                                           |
| 1448661_at   | -2.2 | Plcb3                      | phospholipase C, beta 3                                                                                        |
| 1417012_at   | -2.2 | Sdc2                       | syndecan 2                                                                                                     |
| 1443978_at   | -2.2 | Ankle1                     | ankyrin repeat and LEM domain containing 1                                                                     |
| 1417893_at   | -2.2 | Sfxn3                      | sideroflexin 3                                                                                                 |
|              |      | 100041509 /// EG234703 /// |                                                                                                                |
|              |      | EG665071 ///               |                                                                                                                |
|              |      | ENSMUSG000000058443 ///    |                                                                                                                |
|              |      | LOC100048223 ///           |                                                                                                                |
|              |      | LOC100048462 ///           | predicted gene, 100041509 /// predicted gene, EG234703 /// predicted gene, EG665071 /// predicted gene,        |
|              |      | OTTMUSG00000015005 ///     | ENSMUSG000000058443 /// similar to QM protein /// similar to QM protein /// predicted gene,                    |
| 1415942_at   | -2.2 | Rpl10                      | OTTMUSG00000015005 /// ribosomal protein 10                                                                    |
| 1460559_at   | -2.2 | Kank2                      | KN motif and ankyrin repeat domains 2                                                                          |
|              |      | 100042986 ///              |                                                                                                                |
|              |      | OTTMUSG00000015874 ///     |                                                                                                                |
| 1460543_x_at | -2.2 | Rpl37a                     | predicted gene, 100042986 /// predicted gene, OTTMUSG00000015874 /// ribosomal protein L37a                    |
| 1454649_at   | -2.3 | Srd5a1                     | steroid 5 alpha-reductase 1                                                                                    |
| 1433908_a_at | -2.3 | Ctnn                       | cortactin                                                                                                      |
| 1424906_at   | -2.3 | Pq1c3                      | PQ loop repeat containing                                                                                      |
| 1427234_at   | -2.3 | Vangl1                     | vang-like 1 (van gogh, Drosophila)                                                                             |
| 1452155_a_at | -2.3 | Ddx17                      | DEAD (Asp-Glu-Ala-Asp) box polypeptide 17                                                                      |
| 1435666_at   | -2.3 | Mast3                      | microtubule associated serine/threonine kinase 3                                                               |
| 1448486_at   | -2.3 | Mut                        | methylmalonyl-Coenzyme A mutase                                                                                |
| 1434975_x_at | -2.3 | 4933439C20Rik              | RIKEN cDNA 4933439C20 gene                                                                                     |
| 1418000_a_at | -2.3 | Itm2b                      | integral membrane protein 2B                                                                                   |
| 1424438_a_at | -2.3 | Leprot                     | leptin receptor overlapping transcript                                                                         |
| 1416372_at   | -2.3 | LOC674712 /// Ptdss1       | similar to phosphatidylserine synthase 1 /// phosphatidylserine synthase 1                                     |
| 1428875_at   | -2.3 | Golim4                     | golgi integral membrane protein 4                                                                              |
| 1451068_s_at | -2.3 | Rps25                      | ribosomal protein S25                                                                                          |

|              |      |                        |                                                                                                   |
|--------------|------|------------------------|---------------------------------------------------------------------------------------------------|
| 1451175_at   | -2.3 | Spcc3                  | signal peptidase complex subunit 3 homolog (S. cerevisiae)                                        |
| 1428853_at   | -2.3 | Ptch1                  | patched homolog 1                                                                                 |
| 1425985_s_at | -2.3 | Masp1                  | mannan-binding lectin serine peptidase 1                                                          |
| 1433887_at   | -2.3 | Dnajc3                 | DnaJ (Hsp40) homolog, subfamily C, member 3                                                       |
| 1420895_at   | -2.3 | Tgfbr1                 | transforming growth factor, beta receptor I                                                       |
| 1451359_at   | -2.3 | Lpcat1                 | lysophosphatidylcholine acyltransferase 1                                                         |
| 1437290_at   | -2.4 | Impad1                 | inositol monophosphatase domain containing 1                                                      |
| 1421824_at   | -2.4 | Bace1                  | beta-site APP cleaving enzyme 1                                                                   |
| 1418483_a_at | -2.4 | Ggta1                  | glycoprotein galactosyltransferase alpha 1, 3                                                     |
| 1429425_at   | -2.4 | Rnf139                 | ring finger protein 139                                                                           |
| 1418238_at   | -2.4 | Ivd                    | isovaleryl coenzyme A dehydrogenase                                                               |
| 1432360_a_at | -2.4 | Tmtc4                  | transmembrane and tetratricopeptide repeat containing 4                                           |
| 1423120_at   | -2.4 | Ide                    | insulin degrading enzyme                                                                          |
| 1423846_x_at | -2.4 | Tuba1b                 | tubulin, alpha 1B                                                                                 |
| 1416440_at   | -2.4 | Cd164                  | CD164 antigen                                                                                     |
| 1416664_at   | -2.4 | Cdc20                  | cell division cycle 20 homolog (S. cerevisiae)                                                    |
| 1434891_at   | -2.4 | Ptgrn                  | prostaglandin F2 receptor negative regulator                                                      |
| 1435737_a_at | -2.4 | Nde1                   | nuclear distribution gene E homolog 1 (A nidulans)                                                |
| 1429896_at   | -2.4 | 5830408B19Rik          | RIKEN cDNA 5830408B19 gene                                                                        |
| 1415707_at   | -2.4 | Anapc2                 | anaphase promoting complex subunit 2                                                              |
| 1450431_a_at | -2.5 | Nedd4                  | neural precursor cell expressed, developmentally down-regulated 4                                 |
| 1438602_s_at | -2.5 | Masp1                  | mannan-binding lectin serine peptidase 1                                                          |
| 1448253_at   | -2.5 | Glud1                  | glutamate dehydrogenase 1                                                                         |
| 1454709_at   | -2.5 | Tmem64                 | transmembrane protein 64                                                                          |
| 1417404_at   | -2.5 | Elovl6                 | ELOVL family member 6, elongation of long chain fatty acids (yeast)                               |
| 1438847_at   | -2.5 | Mxd3                   | Max dimerization protein 3                                                                        |
| 1428624_at   | -2.5 | 2810482107Rik          | RIKEN cDNA 2810482107 gene                                                                        |
| 1416750_at   | -2.5 | Sigmar1                | sigma non-opioid intracellular receptor 1                                                         |
| 1436747_at   | -2.5 | Fam100b                | family with sequence similarity 100, member B                                                     |
| 1437289_at   | -2.5 | Impad1                 | inositol monophosphatase domain containing 1                                                      |
| 1448592_at   | -2.5 | Crtap                  | cartilage associated protein                                                                      |
| 1448241_at   | -2.5 | Gm2a                   | GM2 ganglioside activator protein                                                                 |
| 1415698_at   | -2.5 | Golm1                  | golgi membrane protein 1                                                                          |
| 1448647_at   | -2.5 | Man2a1                 | mannosidase 2, alpha 1                                                                            |
| 1448960_at   | -2.6 | Cxxc5                  | CXXC finger 5                                                                                     |
| 1427177_at   | -2.6 | Fycy1                  | FYVE and coiled-coil domain containing 1                                                          |
| 1438976_x_at | -2.6 | Mat2a                  | methionine adenosyltransferase II, alpha                                                          |
| 1435395_s_at | -2.6 | Atp5j2                 | ATP synthase, H+ transporting, mitochondrial F0 complex, subunit f, isoform 2                     |
| 1449125_at   | -2.6 | Tnfrsf81               | tumor necrosis factor, alpha-induced protein 8-like 1                                             |
| 1448498_at   | -2.6 | Rps6ka4                | ribosomal protein S6 kinase, polypeptide 4                                                        |
| 1429189_at   | -2.6 | Arsb                   | arylsulfatase B                                                                                   |
| 1439815_at   | -2.6 | Heatr5b                | HEAT repeat containing 5B                                                                         |
| 1419259_at   | -2.6 | Rsu1                   | Ras suppressor protein 1                                                                          |
| 1417420_at   | -2.6 | Ccnd1                  | cyclin D1                                                                                         |
| 1423917_a_at | -2.6 | Ctnn                   | cortactin                                                                                         |
| 1416536_at   | -2.6 | Mum1                   | melanoma associated antigen (mutated) 1                                                           |
| 1449303_at   | -2.6 | Sestr3                 | Sestrin 3, mRNA (cDNA clone IMAGE:3481673)                                                        |
| 1435649_at   | -2.7 | Nexn                   | nexilin                                                                                           |
| 1426015_s_at | -2.7 | Asph                   | aspartate-beta-hydroxylase                                                                        |
| 1424707_at   | -2.7 | Tmed10                 | transmembrane emp24-like trafficking protein 10 (yeast)                                           |
| 1416364_at   | -2.7 | Hsp90ab1               | heat shock protein 90 alpha (cytosolic), class B member 1                                         |
| 1453572_a_at | -2.7 | Plp2                   | proteolipid protein 2                                                                             |
| 1424828_a_at | -2.7 | Fh1                    | fumarate hydratase 1                                                                              |
| 1430700_a_at | -2.7 | Pla2g7                 | phospholipase A2, group VII (platelet-activating factor acetylhydrolase, plasma)                  |
| 1425506_at   | -2.7 | Mylk                   | myosin, light polypeptide kinase                                                                  |
| 1434037_s_at | -2.7 | Kat2b                  | K(lysine) acetyltransferase 2B                                                                    |
| 1422438_at   | -2.7 | Ephx1                  | epoxide hydrolase 1, microsomal                                                                   |
| 1428647_at   | -2.7 | LOC676870 /// Pbx1     | leukemia transcription factor 1                                                                   |
| 1434123_at   | -2.7 | Fut11                  | fucosyltransferase 11                                                                             |
| 1436824_x_at | -2.7 | Rnf26                  | ring finger protein 26                                                                            |
| 1446618_at   | -2.7 | LOC432971              | hypothetical gene supported by AK038224                                                           |
| 1429739_a_at | -2.7 | Patz1                  | POZ (BTB) and AT hook containing zinc finger 1                                                    |
| 1435652_a_at | -2.7 | Gnai2                  | guanine nucleotide binding protein (G protein), alpha inhibiting 2                                |
| 1418318_at   | -2.7 | Rnf128                 | ring finger protein 128                                                                           |
| 1434518_at   | -2.8 | Phka2                  | phosphorylase kinase alpha 2                                                                      |
| 1460732_a_at | -2.8 | Ppl                    | periplakin                                                                                        |
|              |      | 100042986 ///          |                                                                                                   |
|              |      | OTTMUSG00000015874 /// |                                                                                                   |
| 1416217_a_at | -2.8 | Rpl37a                 | predicted gene, 100042986 /// predicted gene, OTTMUSG00000015874 /// ribosomal protein L37a       |
| 1426690_a_at | -2.8 | Sreb1                  | sterol regulatory element binding transcription factor 1                                          |
| 1435727_s_at | -2.8 | Lima1                  | LIM domain and actin binding 1                                                                    |
| 1424093_x_at | -2.8 | Cd151                  | CD151 antigen                                                                                     |
| 1450862_at   | -2.8 | Rad54l                 | RAD54 like (S. cerevisiae)                                                                        |
| 1428431_at   | -2.8 | Zcchc24                | zinc finger, CCHC domain containing 24                                                            |
| 1428432_at   | -2.8 | Zcchc24                | zinc finger, CCHC domain containing 24                                                            |
| 1438055_at   | -2.8 | Rarres1                | retinoic acid receptor responder (tazarotene induced) 1                                           |
| 1438200_at   | -2.8 | Sulf1                  | sulfatase 1                                                                                       |
|              |      | 4933439C20Rik ///      | RIKEN cDNA 4933439C20 gene /// phosphatidylserine decarboxylase pseudogene /// phosphatidylserine |
| 1436944_x_at | -2.9 | LOC236604 /// Pisd     | decarboxylase                                                                                     |
| 1450388_s_at | -2.9 | Twsg1                  | twisted gastrulation homolog 1 (Drosophila)                                                       |
| 1460409_at   | -2.9 | Cpt1a                  | carntine palmitoyltransferase 1a, liver                                                           |
| 1416529_at   | -2.9 | Emp1                   | epithelial membrane protein 1                                                                     |
| 1426778_at   | -2.9 | Dag1                   | dystroglycan 1                                                                                    |
| 1416365_at   | -2.9 | Hsp90ab1               | heat shock protein 90 alpha (cytosolic), class B member 1                                         |
| 1431375_s_at | -2.9 | Parva                  | parvin, alpha                                                                                     |



|              |      |                   |                                                                                                                              |
|--------------|------|-------------------|------------------------------------------------------------------------------------------------------------------------------|
| 1454843_at   | -2.9 | Prps2             | phosphoribosyl pyrophosphate synthetase 2                                                                                    |
| 1449056_at   | -2.9 | E330009J07Rik     | RIKEN cDNA E330009J07 gene                                                                                                   |
| 1438634_x_at | -2.9 | Lasp1             | LIM and SH3 protein 1                                                                                                        |
| 1423667_at   | -2.9 | Mat2a             | methionine adenosyltransferase II, alpha                                                                                     |
| 1428891_at   | -3.0 | 9130213B05Rik     | RIKEN cDNA 9130213B05 gene                                                                                                   |
| 1417027_at   | -3.0 | Trim2             | tripartite motif-containing 2                                                                                                |
| 1453634_a_at | -3.0 | Erp29             | endoplasmic reticulum protein 29                                                                                             |
| 1416041_at   | -3.0 | Sgk1              | serum/glucocorticoid regulated kinase 1                                                                                      |
| 1455481_at   | -3.0 | Ids               | iduronate 2-sulfatase                                                                                                        |
| 1455789_x_at | -3.0 | Hspa8             | heat shock protein 8                                                                                                         |
| 1421654_a_at | -3.0 | Lmna              | lamin A                                                                                                                      |
| 1449147_at   | -3.1 | Chst1             | carbohydrate (keratan sulfate Gal-6) sulfotransferase 1                                                                      |
| 1422445_at   | -3.1 | Itga6             | integrin alpha 6                                                                                                             |
| 1416000_a_at | -3.1 | Prdx1             | peroxiredoxin 1                                                                                                              |
| 1438386_x_at | -3.1 | Mat2a             | methionine adenosyltransferase II, alpha                                                                                     |
| 1437308_s_at | -3.1 | F2r               | coagulation factor II (thrombin) receptor                                                                                    |
| 1434642_at   | -3.1 | Hsd17b11          | hydroxysteroid (17-beta) dehydrogenase 11                                                                                    |
|              |      | 1190002N15Rik /// |                                                                                                                              |
| 1433582_at   | -3.1 | LOC100044725      | RIKEN cDNA 1190002N15 gene /// hypothetical protein LOC100044725                                                             |
| 1415855_at   | -3.2 | Kitl              | kit ligand                                                                                                                   |
| 1455470_x_at | -3.2 | Lasp1             | LIM and SH3 protein 1                                                                                                        |
| 1450852_s_at | -3.2 | F2r               | coagulation factor II (thrombin) receptor                                                                                    |
| 1451339_at   | -3.2 | Suox              | sulfite oxidase                                                                                                              |
| 1428789_at   | -3.2 | Ralgps2           | CDNA clone IMAGE:6828107                                                                                                     |
| 1434105_at   | -3.2 | Epm2aip1          | EPM2A (laforin) interacting protein 1                                                                                        |
| 1454677_at   | -3.2 | Timp2             | tissue inhibitor of metalloproteinase 2                                                                                      |
| 1423732_at   | -3.2 | Tram1             | translocating chain-associating membrane protein 1                                                                           |
| 1422906_at   | -3.2 | Abcg2             | ATP-binding cassette, sub-family G (WHITE), member 2                                                                         |
| 1428801_at   | -3.3 | Mgat3             | mannoside acetylglucosaminyltransferase 3                                                                                    |
| 1420836_at   | -3.3 | Slc25a30          | solute carrier family 25, member 30                                                                                          |
| 1438630_x_at | -3.4 | Mat2a             | methionine adenosyltransferase II, alpha                                                                                     |
| 1449145_a_at | -3.4 | Cav1              | caveolin 1, caveolae protein                                                                                                 |
| 1448433_a_at | -3.4 | Pcolce            | procollagen C-endopeptidase enhancer protein                                                                                 |
| 1423484_at   | -3.5 | 4930533K18Rik /// | RIKEN cDNA 4930533K18 gene /// bicaudal C homolog 1 (Drosophila)                                                             |
| 1456292_a_at | -3.5 | Vim               | vimentin                                                                                                                     |
| 1453304_s_at | -3.5 | Ly6e              | lymphocyte antigen 6 complex, locus E                                                                                        |
| 1416269_at   | -3.5 | Atp5j2            | ATP synthase, H+ transporting, mitochondrial F0 complex, subunit f, isoform 2                                                |
| 1448354_at   | -3.5 | G6pdx             | glucose-6-phosphate dehydrogenase X-linked                                                                                   |
| 1417056_at   | -3.5 | Psme1             | proteasome (prosome, macropain) 28 subunit, alpha                                                                            |
| 1429089_s_at | -3.5 | 2900026A02Rik     | RIKEN cDNA 2900026A02 gene                                                                                                   |
| 1418157_at   | -3.5 | LOC100046044 ///  | similar to COUP-TF1 /// nuclear receptor subfamily 2, group F, member 1                                                      |
| 1457446_at   | -3.5 | Opcml             | opioid binding protein/cell adhesion molecule-like                                                                           |
| 1433576_at   | -3.6 | Mat2a             | methionine adenosyltransferase II, alpha                                                                                     |
| 1415984_at   | -3.6 | Acadm             | acyl-Coenzyme A dehydrogenase, medium chain                                                                                  |
| 1428082_at   | -3.6 | Acsf5             | acyl-CoA synthetase long-chain family member 5                                                                               |
| 1452037_at   | -3.6 | Mgat2             | mannoside acetylglucosaminyltransferase 2                                                                                    |
| 1443832_s_at | -3.6 | Sdpr              | serum deprivation response                                                                                                   |
| 1448533_at   | -3.6 | Tbcb              | tubulin folding cofactor B                                                                                                   |
| 1416868_at   | -3.6 | Cdkn2c            | cyclin-dependent kinase inhibitor 2C (p18, inhibits CDK4)                                                                    |
| 1415770_at   | -3.7 | Wdr6              | WD repeat domain 6                                                                                                           |
| 1415818_at   | -3.7 | Anxa6             | annexin A6                                                                                                                   |
| 1423712_a_at | -3.7 | Qars              | glutamyl-tRNA synthetase                                                                                                     |
| 1433504_at   | -3.7 | Pygb              | brain glycogen phosphorylase                                                                                                 |
| 1428795_at   | -3.7 | 1110021L09Rik     | RIKEN cDNA 1110021L09 gene                                                                                                   |
| 1433770_at   | -3.7 | Dpysl2            | dihydropyrimidinase-like 2                                                                                                   |
| 1424829_at   | -3.8 | A830007P12Rik     | RIKEN cDNA A830007P12 gene                                                                                                   |
| 1424157_at   | -3.8 | Ehd2              | EH-domain containing 2                                                                                                       |
| 1437760_at   | -3.8 | Galnt12           | UDP-N-acetyl-alpha-D-galactosamine:polypeptide N-acetylgalactosaminyltransferase 12                                          |
| 1423790_at   | -3.8 | Dap               | death-associated protein                                                                                                     |
| 1429390_at   | -3.8 | Acpl2             | acid phosphatase-like 2                                                                                                      |
| 1460173_at   | -3.9 | Lasp1             | LIM and SH3 protein 1                                                                                                        |
| 1416167_at   | -3.9 | Prdx4             | peroxiredoxin 4                                                                                                              |
|              |      | 1190002N15Rik /// |                                                                                                                              |
| 1433581_at   | -3.9 | LOC100044725      | RIKEN cDNA 1190002N15 gene /// hypothetical protein LOC100044725                                                             |
| 1436029_at   | -4.0 | Bicc1             | bicaudal C homolog 1 (Drosophila)                                                                                            |
| 1435972_at   | -4.1 | Cast              | calpastatin                                                                                                                  |
| 1456735_x_at | -4.1 | Acpl2             | acid phosphatase-like 2                                                                                                      |
|              |      | 1420416_at        | hypothetical protein LOC100044161 /// sema domain, immunoglobulin domain (Ig), short basic domain, secreted, (semaphorin) 3A |
| 1441137_at   | -4.1 | Bicc1             | bicaudal C homolog 1 (Drosophila)                                                                                            |
| 1416256_a_at | -4.1 | Tubb5             | tubulin, beta 5                                                                                                              |
| 1416044_at   | -4.1 | Flii              | flightless I homolog (Drosophila)                                                                                            |
| 1416779_at   | -4.2 | Sdpr              | serum deprivation response                                                                                                   |
| 1435785_at   | -4.3 | Ehd2              | EH-domain containing 2                                                                                                       |
| 1433751_at   | -4.3 | Slc39a10          | solute carrier family 39 (zinc transporter), member 10                                                                       |
| 1452861_at   | -4.3 | 2010300C02Rik     | RIKEN cDNA 2010300C02 gene                                                                                                   |
| 1424130_a_at | -4.3 | Ptfr              | polymerase I and transcript release factor                                                                                   |
| 1450641_at   | -4.4 | Vim               | vimentin                                                                                                                     |
| 1416589_at   | -4.4 | Sparc             | secreted acidic cysteine rich glycoprotein                                                                                   |
| 1450920_at   | -4.5 | Ccnb2             | cyclin B2                                                                                                                    |
| 1455627_at   | -4.6 | Col8a1            | collagen, type VIII, alpha 1                                                                                                 |
| 1433825_at   | -4.6 | Ntrk3             | neurotrophic tyrosine kinase, receptor, type 3                                                                               |
| 1455160_at   | -4.6 | 2610203C20Rik     | RIKEN cDNA 2610203C20 gene                                                                                                   |
| 1418840_at   | -4.7 | Pdcd4             | programmed cell death 4                                                                                                      |
| 1426369_at   | -4.8 | Far1              | fatty acyl CoA reductase 1                                                                                                   |
| 1450062_a_at | -4.8 | Maged1            | melanoma antigen, family D, 1                                                                                                |

|              |       |                         |                                                                                                                              |
|--------------|-------|-------------------------|------------------------------------------------------------------------------------------------------------------------------|
| 1449865_at   | -4.8  | LOC100044161 /// Sema3a | hypothetical protein LOC100044161 /// sema domain, immunoglobulin domain (Ig), short basic domain, secreted, (semaphorin) 3A |
| 1416967_at   | -4.9  | Sox2                    | SRY-box containing gene 2                                                                                                    |
| 1453055_at   | -5.0  | Sema6d                  | sema domain, transmembrane domain (TM), and cytoplasmic domain, (semaphorin) 6D                                              |
| 1448392_at   | -5.0  | Sparc                   | secreted acidic cysteine rich glycoprotein                                                                                   |
| 1460184_at   | -5.3  | Hadh                    | hydroxyacyl-Coenzyme A dehydrogenase                                                                                         |
| 1415822_at   | -5.4  | Scd2                    | stearoyl-Coenzyme A desaturase 2                                                                                             |
| 1455940_x_at | -5.5  | Wdr6                    | WD repeat domain 6                                                                                                           |
| 1455972_x_at | -5.6  | Hadh                    | hydroxyacyl-Coenzyme A dehydrogenase                                                                                         |
| 1459823_at   | -5.8  | Ehd2                    | EH-domain containing 2                                                                                                       |
| 1420622_a_at | -6.1  | Hspa8                   | heat shock protein 8                                                                                                         |
| 1420623_x_at | -6.2  | Hspa8                   | heat shock protein 8                                                                                                         |
| 1456393_at   | -6.3  | 2310002J21Rik           | RIKEN cDNA 2310002J21 gene                                                                                                   |
| 1423642_at   | -6.6  | Tubb2c                  | tubulin, beta 2c                                                                                                             |
| 1438195_at   | -7.0  | Gpd1l                   | glycerol-3-phosphate dehydrogenase 1-like                                                                                    |
| 1417852_x_at | -7.1  | Clca1                   | chloride channel calcium activated 1                                                                                         |
| 1460259_s_at | -7.7  | Clca1 /// Clca2         | chloride channel calcium activated 1 /// chloride channel calcium activated 2                                                |
| 1455719_at   | -7.7  | Tubb5                   | tubulin, beta 5                                                                                                              |
| 1417732_at   | -8.0  | Anxa8                   | annexin A8                                                                                                                   |
| 1436528_at   | -9.0  | Kazald1                 | Kazal-type serine peptidase inhibitor domain 1                                                                               |
| 1425789_s_at | -11.1 | Anxa8                   | annexin A8                                                                                                                   |
| 1416326_at   | -23.2 | Crip1                   | cysteine-rich protein 1 (intestinal)                                                                                         |

Table S3C.

| Moe430_2<br>GeneChip<br>probeset | fold-change | gene symbol            | gene description                                                                                     |
|----------------------------------|-------------|------------------------|------------------------------------------------------------------------------------------------------|
| 1449773_s_at                     | 27.6        | 1110021L09Rik          | RIKEN cDNA 1110021L09 gene                                                                           |
| 1435462_at                       | 21.9        | Maged1                 | melanoma antigen, family D, 1                                                                        |
| 1455324_at                       | 20.6        | Sparc                  | secreted acidic cysteine rich glycoprotein                                                           |
| 1455197_at                       | 20.5        | 5530400B01Rik          | RIKEN cDNA 5530400B01 gene                                                                           |
| 1450971_at                       | 16.4        | Pde3b                  | phosphodiesterase 3B, cGMP-inhibited                                                                 |
| 1449591_at                       | 15.8        | 2810482I07Rik          | RIKEN cDNA 2810482I07 gene                                                                           |
| 1420197_at                       | 15.5        | Racgap1                | Rac GTPase-activating protein 1                                                                      |
| 1460722_at                       | 15.5        | Dlc1                   | deleted in liver cancer 1                                                                            |
| 1425155_x_at                     | 15.0        | Fyco1                  | FYVE and coiled-coil domain containing 1                                                             |
| 1420991_at                       | 14.3        | Xpnpep1                | X-prolyl aminopeptidase (aminopeptidase P) 1, soluble                                                |
| 1422573_at                       | 13.9        | Cd44                   | CD44 antigen                                                                                         |
| 1420992_at                       | 13.0        | Cpox                   | coproporphyrinogen oxidase                                                                           |
| 1418930_at                       | 12.8        | P2rx7                  | purinergic receptor P2X, ligand-gated ion channel, 7                                                 |
| 1437110_at                       | 12.4        | Creld2                 | cysteine-rich with EGF-like domains 2                                                                |
| 1418829_a_at                     | 11.8        | Fig4                   | FIG4 homolog (S. cerevisiae)                                                                         |
| 1419149_at                       | 10.8        | Cpeb4                  | cytoplasmic polyadenylation element binding protein 4                                                |
| 1450829_at                       | 10.8        | 2810055G20Rik          | RIKEN cDNA 2810055G20 gene                                                                           |
| 1435955_at                       | 10.2        | Sqstm1                 | sequestosome 1                                                                                       |
| 1419697_at                       | 9.5         | Ripk2                  | receptor (TNFRSF)-interacting serine-threonine kinase 2                                              |
| 1425837_a_at                     | 9.0         | Chuk                   | conserved helix-loop-helix ubiquitous kinase                                                         |
| 1453589_a_at                     | 9.0         | D030029J20Rik          | RIKEN cDNA D030029J20 gene                                                                           |
| 1422612_at                       | 8.8         | Prkcdpb                | protein kinase C, delta binding protein                                                              |
| 1418188_a_at                     | 8.7         | Foxa1 /// LOC100047556 | forkhead box A1 /// similar to Hepatocyte nuclear factor 3-alpha (HNF-3A) (Forkhead box protein A1)  |
| 1427334_s_at                     | 8.7         | D19Wsu162e             | DNA segment, Chr 19, Wayne State University 162, expressed                                           |
| 1439787_at                       | 8.7         | Aco1                   | aconitase 1                                                                                          |
| 1447870_x_at                     | 8.5         | Gtlf3a                 | gene trap locus F3a                                                                                  |
| 1425519_a_at                     | 8.3         | Tnip1                  | TNFAIP3 interacting protein 1                                                                        |
| 1449731_s_at                     | 8.3         | Ralgps2                | CDNA clone IMAGE:6828107                                                                             |
| 1419675_at                       | 8.1         | Loxl4                  | lysyl oxidase-like 4                                                                                 |
| 1434574_at                       | 8.0         | Dctn6                  | dynactin 6                                                                                           |
| 1429040_at                       | 7.9         | Cd109                  | CD109 antigen                                                                                        |
| 1440346_at                       | 7.8         | Ehd2                   | EH-domain containing 2                                                                               |
| 1424735_at                       | 7.8         | Obfc2a                 | oligonucleotide/oligosaccharide-binding fold containing 2A                                           |
| 1423904_a_at                     | 7.7         | Btg1 /// LOC100047353  | B-cell translocation gene 1, anti-proliferative /// similar to myocardial vascular inhibition factor |
| 1434015_at                       | 7.1         | Urod                   | uroporphyrinogen decarboxylase                                                                       |
| 1445381_at                       | 7.0         | Bpgm                   | 2,3-bisphosphoglycerate mutase                                                                       |
| 1420089_at                       | 7.0         | Ptpn14                 | protein tyrosine phosphatase, non-receptor type 14                                                   |
| 1429588_at                       | 6.9         | Wipf1                  | WAS/WASL interacting protein family, member 1                                                        |
| 1433453_a_at                     | 6.9         | Cnbp                   | cellular nucleic acid binding protein                                                                |
| 1417408_at                       | 6.6         | Psmc6                  | proteasome (prosome, macropain) 26S subunit, ATPase, 6                                               |
| 1458802_at                       | 6.5         | Tsr1                   | TSR1, 20S rRNA accumulation, homolog (yeast)                                                         |
| 1417487_at                       | 6.4         | Sfxn3                  | sideroflexin 3                                                                                       |
| 1427372_at                       | 6.3         | Slc39a10               | solute carrier family 39 (zinc transporter), member 10                                               |
| 1419853_a_at                     | 6.3         | Ern1                   | endoplasmic reticulum (ER) to nucleus signalling 1                                                   |
| 1448306_at                       | 6.2         | Mobk1b                 | MOB1, Mps One Binder kinase activator-like 1B (yeast)                                                |
| 1448961_at                       | 6.2         | Zmpste24               | zinc metallopeptidase, STE24 homolog (S. cerevisiae)                                                 |
| 1450199_a_at                     | 6.1         | 2900026A02Rik          | RIKEN cDNA 2900026A02 gene                                                                           |
| 1450474_at                       | 6.0         | 2610024B07Rik          | RIKEN cDNA 2610024B07 gene                                                                           |
| 1419030_at                       | 6.0         | Pglyrp2                | peptidoglycan recognition protein 2                                                                  |
| 1426063_a_at                     | 5.9         | Acbd5                  | acyl-Coenzyme A binding domain containing 5                                                          |
| 1446894_at                       | 5.9         | Cd81                   | CD81 antigen                                                                                         |
| 1434405_at                       | 5.9         | Ddx21                  | DEAD (Asp-Glu-Ala-Asp) box polypeptide 21                                                            |
| 1416067_at                       | 5.8         | Fkbp5                  | FK506 binding protein 5                                                                              |
| 1434786_at                       | 5.8         | Rps6ka4                | ribosomal protein S6 kinase, polypeptide 4                                                           |
| 1447923_at                       | 5.8         | Hdlbp                  | high density lipoprotein (HDL) binding protein                                                       |
| 1416268_at                       | 5.7         | Man2b1                 | mannosidase 2, alpha B1                                                                              |
| 1433694_at                       | 5.7         | Nuak1                  | NUAK family, SNF1-like kinase, 1                                                                     |
| 1451006_at                       | 5.7         | 4732418C07Rik          | RIKEN cDNA 4732418C07 gene                                                                           |

|              |     |                              |                                                                                                                          |
|--------------|-----|------------------------------|--------------------------------------------------------------------------------------------------------------------------|
| 1437247_at   | 5.6 | Nhlrc2                       | NHL repeat containing 2                                                                                                  |
| 1423156_at   | 5.5 | Thap4                        | THAP domain containing 4                                                                                                 |
| 1419529_at   | 5.4 | St6gal1                      | beta galactoside alpha 2,6 sialyltransferase 1                                                                           |
| 1427540_at   | 5.4 | Jak1                         | Janus kinase 1                                                                                                           |
| 1425020_at   | 5.3 | Pcf11                        | cleavage and polyadenylation factor subunit homolog (S. cerevisiae)                                                      |
| 1420088_at   | 5.2 | Stat5a                       | signal transducer and activator of transcription 5A                                                                      |
| 1447612_x_at | 5.2 | Slc12a7                      | solute carrier family 12, member 7                                                                                       |
| 1456395_at   | 5.2 | Zfp445                       | zinc finger protein 445                                                                                                  |
| 1460336_at   | 5.1 | Camk2d                       | calcium/calmodulin-dependent protein kinase II, delta                                                                    |
| 1451160_s_at | 5.1 | Epm2aip1                     | EPM2A (laforin) interacting protein 1                                                                                    |
| 1438157_s_at | 5.1 | Ttc21b                       | tetratricopeptide repeat domain 21B                                                                                      |
| 1451338_at   | 5.1 | Nrip1                        | nuclear receptor interacting protein 1                                                                                   |
| 1419029_at   | 5.1 | Dab2                         | disabled homolog 2 (Drosophila)                                                                                          |
| 1452397_at   | 5.0 | 1810011O10Rik                | RIKEN cDNA 1810011O10 gene                                                                                               |
| 1450295_s_at | 5.0 | Wdr68                        | WD repeat domain 68                                                                                                      |
| 1421392_a_at | 5.0 | Rnf5                         | ring finger protein 5                                                                                                    |
| 1424892_at   | 4.9 | Trim33                       | tripartite motif-containing 33                                                                                           |
| 1437751_at   | 4.9 | Ehmt1                        | euchromatic histone methyltransferase 1                                                                                  |
| 1454862_at   | 4.9 | Map3k5                       | mitogen-activated protein kinase kinase kinase 5                                                                         |
| 1448855_at   | 4.9 | Vangl1                       | vang-like 1 (van gogh, Drosophila)                                                                                       |
| 1455816_a_at | 4.9 | Fam20b                       | family with sequence similarity 20, member B                                                                             |
| 1444302_at   | 4.9 | Arfgef1                      | ADP-ribosylation factor guanine nucleotide-exchange factor 1(brefeldin A-inhibited)                                      |
| 1428691_at   | 4.9 | Msi2                         | Musashi homolog 2 (Drosophila)                                                                                           |
| 1441737_s_at | 4.9 | Sptlc2                       | serine palmitoyltransferase, long chain base subunit 2                                                                   |
| 1435595_at   | 4.8 | Twsg1                        | twisted gastrulation homolog 1 (Drosophila)                                                                              |
| 1420617_at   | 4.8 | Bace1                        | beta-site APP cleaving enzyme 1                                                                                          |
| 1423903_at   | 4.8 | Gem                          | GTP binding protein (gene overexpressed in skeletal muscle)                                                              |
| 1448610_a_at | 4.7 | Fam129b                      | family with sequence similarity 129, member B                                                                            |
| 1427005_at   | 4.7 | Pygb                         | brain glycogen phosphorylase                                                                                             |
| 1448957_at   | 4.7 | Cyp27b1                      | cytochrome P450, family 27, subfamily b, polypeptide 1                                                                   |
| 1416691_at   | 4.6 | Cdkn2c                       | cyclin-dependent kinase inhibitor 2C (p18, inhibits CDK4)                                                                |
| 1450173_at   | 4.6 | Malat1                       | metastasis associated lung adenocarcinoma transcript 1 (non-coding RNA)                                                  |
| 1428365_a_at | 4.5 | Phka2                        | phosphorylase kinase alpha 2                                                                                             |
| 1439837_at   | 4.5 | Phf201l                      | PHD finger protein 20-like 1                                                                                             |
| 1452214_at   | 4.5 | Btaf1                        | BTAf1 RNA polymerase II, B-TFIID transcription factor-associated, (Mot1 homolog, S. cerevisiae)                          |
| 1451593_at   | 4.5 | C730026J16                   | hypothetical protein C730026J16                                                                                          |
| 1418536_at   | 4.5 | Aire                         | autoimmune regulator (autoimmune polyendocrinopathy candidiasis ectodermal dystrophy)                                    |
| 1422492_at   | 4.4 | Edem2                        | ER degradation enhancer, mannosidase alpha-like 2                                                                        |
|              |     | 100041163 /// 100041478 ///  |                                                                                                                          |
|              |     | ENSMUSG00000063556 ///       | predicted gene, 100041163 /// predicted gene, 100041478 /// predicted gene, ENSMUSG00000063556 ///                       |
| 1424408_at   | 4.4 | LOC100046821 /// Rpl23a      | similar to ribosomal protein L23a /// ribosomal protein L23a                                                             |
| 1420618_at   | 4.4 | Abca1                        | ATP-binding cassette, sub-family A (ABC1), member 1                                                                      |
| 1436897_at   | 4.3 | Tex2                         | testis expressed gene 2                                                                                                  |
| 1439399_a_at | 4.3 | Zeb2                         | zinc finger E-box binding homeobox 2                                                                                     |
| 1433454_at   | 4.3 | Rnps1                        | ribonucleic acid binding protein S1                                                                                      |
| 1448485_at   | 4.3 | Dimt1                        | DIM1 dimethyladenosine transferase 1-like (S. cerevisiae)                                                                |
| 1428279_a_at | 4.3 | Itfg3                        | integrin alpha FG-GAP repeat containing 3                                                                                |
| 1456880_at   | 4.2 | Cdgap                        | CDC42 GTPase-activating protein                                                                                          |
| 1455688_at   | 4.2 | H2-Q5                        | histocompatibility 2, Q region locus 5                                                                                   |
|              |     | Raet1a /// Raet1b /// Raet1c | retinoic acid early transcript 1, alpha /// retinoic acid early transcript beta /// retinoic acid early transcript gamma |
| 1419105_at   | 4.2 | /// Raet1d /// Raet1e        | /// retinoic acid early transcript delta /// retinoic acid early transcript 1E                                           |
| 1436173_at   | 4.2 | Slc9a3r1                     | solute carrier family 9 (sodium/hydrogen exchanger), member 3 regulator 1                                                |
| 1454731_at   | 4.2 | Mxd3                         | Max dimerization protein 3                                                                                               |
| 1421066_at   | 4.2 | Myo10                        | myosin X                                                                                                                 |
| 1426464_at   | 4.2 | Ptms                         | parathyrosin                                                                                                             |
| 1415941_s_at | 4.1 | Acadm                        | acyl-Coenzyme A dehydrogenase, medium chain                                                                              |
|              |     | ENSMUSG00000074460 ///       |                                                                                                                          |
| 1429060_at   | 4.1 | Tmed2                        | predicted gene, ENSMUSG00000074460 /// transmembrane emp24 domain trafficking protein 2                                  |
| 1450957_a_at | 4.1 | 5730593F17Rik                | RIKEN cDNA 5730593F17 gene                                                                                               |
| 1433798_a_at | 4.0 | Lasp1                        | LIM and SH3 protein 1                                                                                                    |
| 1434350_at   | 4.0 | Hmox1                        | heme oxygenase (decycling) 1                                                                                             |
| 1457042_at   | 4.0 | Rnd1                         | Rho family GTPase 1                                                                                                      |
| 1435108_at   | 4.0 | Nipsnap3a                    | nipsnap homolog 3A (C. elegans)                                                                                          |
| 1452997_at   | 3.9 | Kazald1                      | Kazal-type serine peptidase inhibitor domain 1                                                                           |
| 1419203_at   | 3.9 | Aes                          | amino-terminal enhancer of split                                                                                         |
| 1434980_at   | 3.9 | Ubqln4                       | ubiquilin 4                                                                                                              |
| 1449668_s_at | 3.9 | 1500001M20Rik                | RIKEN cDNA 1500001M20 gene                                                                                               |
| 1449702_at   | 3.9 | Chd2                         | chromodomain helicase DNA binding protein 2                                                                              |
| 1434184_s_at | 3.9 | Gusb                         | glucuronidase, beta                                                                                                      |
| 1456871_a_at | 3.9 | 2610203C20Rik                | RIKEN cDNA 2610203C20 gene                                                                                               |
| 1418835_at   | 3.8 | 4833420G17Rik                | RIKEN cDNA 4833420G17 gene                                                                                               |
| 1433850_at   | 3.8 | Incenp                       | inner centromere protein                                                                                                 |
| 1425241_a_at | 3.8 | Itgb4                        | integrin beta 4                                                                                                          |
| 1418960_at   | 3.8 | Maf1                         | MAF1 homolog (S. cerevisiae)                                                                                             |
| 1441691_at   | 3.7 | St3gal5                      | ST3 beta-galactoside alpha-2,3-sialyltransferase 5                                                                       |
| 1428674_at   | 3.7 | Gramd1b                      | GRAM domain containing 1B                                                                                                |
| 1429527_a_at | 3.7 | Nav1                         | neuron navigator 1                                                                                                       |
| 1447685_x_at | 3.7 | H2-Q7                        | histocompatibility 2, Q region locus 7                                                                                   |
| 1423434_at   | 3.7 | Gclc                         | glutamate-cysteine ligase, catalytic subunit                                                                             |
| 1422018_at   | 3.7 | 4930533K18Rik /// Bicc1      | RIKEN cDNA 4930533K18 gene /// bicaudal C homolog 1 (Drosophila)                                                         |
| 1445758_at   | 3.7 | Pnrc2                        | proline-rich nuclear receptor coactivator 2                                                                              |
| 1433674_a_at | 3.7 | Lasp1                        | LIM and SH3 protein 1                                                                                                    |
| 1434025_at   | 3.6 | E030049G20Rik                | RIKEN cDNA E030049G20 gene                                                                                               |
|              |     | D14Etd449e ///               |                                                                                                                          |
|              |     | ENSMUSG00000021867 ///       | DNA segment, Chr 14, ERATO Doi 449, expressed /// predicted gene, ENSMUSG00000021867 /// predicted                       |
| 1426526_s_at | 3.6 | ENSMUSG00000072676           | gene, ENSMUSG00000072676                                                                                                 |

|              |     |                        |                                                                                                   |
|--------------|-----|------------------------|---------------------------------------------------------------------------------------------------|
| 1421065_at   | 3.6 | Atp5k                  | ATP synthase, H+ transporting, mitochondrial F1F0 complex, subunit e                              |
| 1430062_at   | 3.6 | Pdik1l                 | PDLIM1 interacting kinase 1 like                                                                  |
| 1455029_at   | 3.6 | D2Ertfd750e            | DNA segment, Chr 2, ERATO Doi 750, expressed, mRNA (cDNA clone MGC:30961 IMAGE:4021550)           |
| 1427159_at   | 3.6 | Plscr4                 | phospholipid scramblase 4                                                                         |
| 1423685_at   | 3.6 | Ptprd                  | protein tyrosine phosphatase, receptor type, D                                                    |
| 1429412_at   | 3.6 | Mfhas1                 | malignant fibrous histiocytoma amplified sequence 1                                               |
| 1421043_s_at | 3.6 | Parp1                  | poly (ADP-ribose) polymerase family, member 1                                                     |
| 1453119_at   | 3.6 | Mbtps2                 | membrane-bound transcription factor peptidase, site 2                                             |
| 1418105_at   | 3.6 | Kif5b                  | kinesin family member 5B                                                                          |
| 1431293_a_at | 3.6 | Lrrc45                 | leucine rich repeat containing 45                                                                 |
| 1426725_s_at | 3.5 | Rassf6                 | Ras association (RalGDS/AF-6) domain family member 6                                              |
| 1421640_a_at | 3.5 | Atp1b3                 | ATPase, Na+/K+ transporting, beta 3 polypeptide                                                   |
| 1452833_at   | 3.5 | A630007B06Rik          | RIKEN cDNA A630007B06 gene                                                                        |
| 1428982_at   | 3.5 | Atad2                  | ATPase family, AAA domain containing 2                                                            |
| 1438707_at   | 3.5 | Wdr6                   | WD repeat domain 6                                                                                |
| 1438045_at   | 3.5 | Nol5a                  | nucleolar protein 5A                                                                              |
| 1443966_at   | 3.5 | LOC100044627 /// Rpl23 | similar to HL23 ribosomal protein /// ribosomal protein L23                                       |
|              |     | 4933439C20Rik ///      | RIKEN cDNA 4933439C20 gene /// phosphatidylserine decarboxylase pseudogene /// phosphatidylserine |
|              |     | LOC236604 /// Pisd     | decarboxylase                                                                                     |
| 1429556_at   | 3.5 | E330034G19Rik          | RIKEN cDNA E330034G19 gene                                                                        |
| 1450977_s_at | 3.5 | Lonp1                  | lon peptidase 1, mitochondrial                                                                    |
| 1426290_at   | 3.5 | Eif1                   | eukaryotic translation initiation factor 1                                                        |
| 1422804_at   | 3.5 | Mgea5                  | meningioma expressed antigen 5 (hyaluronidase)                                                    |
| 1427160_at   | 3.5 | Ndufa4                 | NADH dehydrogenase (ubiquinone) 1 alpha subcomplex, 4                                             |
| 1423173_at   | 3.4 | Atrx                   | Alpha thalassemia/mental retardation syndrome X-linked homolog (human) (Atrx), mRNA               |
| 1454725_at   | 3.4 | 1700058M13Rik          | RIKEN cDNA 1700058M13 gene                                                                        |
| 1450700_at   | 3.4 | 4933439C20Rik ///      | RIKEN cDNA 4933439C20 gene /// phosphatidylserine decarboxylase pseudogene /// phosphatidylserine |
|              |     | LOC236604 /// Pisd     | decarboxylase                                                                                     |
| 1424043_at   | 3.4 | Oaz1                   | ornithine decarboxylase antizyme 1                                                                |
| 1429005_at   | 3.4 | Impad1                 | inositol monophosphatase domain containing 1                                                      |
| 1453260_a_at | 3.4 | 2610028A01Rik          | RIKEN cDNA 2610028A01 gene                                                                        |
| 1419650_at   | 3.4 | Marcks                 | myristoylated alanine rich protein kinase C substrate                                             |
| 1415940_at   | 3.4 | Rbms1                  | RNA binding motif, single stranded interacting protein 1                                          |
| 1451083_s_at | 3.4 | Pdcd4                  | programmed cell death 4                                                                           |
| 1418423_s_at | 3.4 | Htt                    | huntingtin                                                                                        |
| 1423848_at   | 3.4 | Ide                    | insulin degrading enzyme                                                                          |
| 1452163_at   | 3.4 | Lmna                   | lamin A                                                                                           |
| 1448436_a_at | 3.3 | Nr3c1                  | nuclear receptor subfamily 3, group C, member 1                                                   |
| 1441836_x_at | 3.3 | H47                    | histocompatibility 47                                                                             |
| 1452418_at   | 3.3 | Cgn                    | cingulin                                                                                          |
| 1452207_at   | 3.3 | Ampd3                  | adenosine monophosphate deaminase 3                                                               |
| 1421089_a_at | 3.3 | Cc2d2a                 | coiled-coil and C2 domain containing 2A                                                           |
| 1429041_at   | 3.3 | Aplp2                  | amyloid beta (A4) precursor-like protein 2                                                        |
| 1422544_at   | 3.3 | Asph                   | aspartate-beta-hydroxylase                                                                        |
| 1419543_a_at | 3.3 | Cdc42ep4               | CDC42 effector protein (Rho GTPase binding) 4                                                     |
| 1429262_at   | 3.3 | Gnpnat1                | glucosamine-phosphate N-acetyltransferase 1                                                       |
| 1421756_a_at | 3.3 | Ech1                   | enoyl coenzyme A hydratase 1, peroxisomal                                                         |
| 1434746_at   | 3.3 | Fam168a                | family with sequence similarity 168, member A                                                     |
| 1451316_a_at | 3.2 | Serpinh6b              | serine (or cysteine) peptidase inhibitor, clade B, member 6b                                      |
| 1421308_at   | 3.2 | Parp1                  | poly (ADP-ribose) polymerase family, member 1                                                     |
| 1421058_at   | 3.2 | Glb1                   | galactosidase, beta 1                                                                             |
| 1453181_x_at | 3.2 | Fam108a                | family with sequence similarity 108, member A                                                     |
| 1415747_s_at | 3.2 | Snhg1                  | small nucleolar RNA host gene (non-protein coding) 1                                              |
| 1450970_at   | 3.2 | 9430029L20Rik          | RIKEN cDNA 9430029L20 gene                                                                        |
| 1452869_at   | 3.2 | Tbc1d2b                | TBC1 domain family, member 2B                                                                     |
| 1449314_at   | 3.2 | Git2                   | G protein-coupled receptor kinase-interactor 2                                                    |
| 1428909_at   | 3.1 | Igfbp4                 | insulin-like growth factor binding protein 4                                                      |
| 1431035_at   | 3.1 | Sec24c                 | Sec24 related gene family, member C (S. cerevisiae)                                               |
| 1436811_at   | 3.1 | Smarca2                | SWI/SNF related, matrix associated, actin dependent regulator of chromatin, subfamily a, member 2 |
| 1426827_at   | 3.1 | Pvr                    | poliovirus receptor                                                                               |
| 1435540_at   | 3.1 | Gsta4                  | glutathione S-transferase, alpha 4                                                                |
| 1416273_at   | 3.1 | Ccdc93                 | coiled-coil domain containing 93                                                                  |
| 1424861_at   | 3.1 | Actr1b                 | ARP1 actin-related protein 1 homolog B, contractin beta (yeast)                                   |
| 1455191_x_at | 3.1 | Tra2a                  | transformer 2 alpha homolog (Drosophila)                                                          |
| 1437696_at   | 3.1 | Traf3ip1               | TNF receptor-associated factor 3 interacting protein 1                                            |
| 1456026_at   | 3.1 | Erp29                  | endoplasmic reticulum protein 29                                                                  |
| 1437406_x_at | 3.1 | Bat1a                  | HLA-B-associated transcript 1A                                                                    |
| 1434348_at   | 3.1 | Elov5                  | ELOVL family member 5, elongation of long chain fatty acids (yeast)                               |
| 1430271_x_at | 3.0 | Cpeb4                  | cytoplasmic polyadenylation element binding protein 4                                             |
| 1419148_at   | 3.0 | Spp1                   | secreted phosphoprotein 1                                                                         |
| 1435248_a_at | 3.0 | 6330577E15Rik          | RIKEN cDNA 6330577E15 gene                                                                        |
| 1423760_at   | 3.0 | Zfpm2                  | zinc finger protein, multitype 2                                                                  |
| 1435249_at   | 3.0 | Cugbp2                 | CUG triplet repeat, RNA binding protein 2                                                         |
| 1435470_at   | 3.0 | Sigmar1                | sigma non-opioid intracellular receptor 1                                                         |
| 1416563_at   | 3.0 | Pvr                    | poliovirus receptor                                                                               |
| 1423044_at   | 3.0 | Lactb /// LOC677144    | lactamase, beta /// similar to lactamase, beta                                                    |
| 1435137_s_at | 3.0 | Ets2                   | E26 avian leukemia oncogene 2, 3' domain                                                          |
| 1434054_at   | 3.0 | Cd9                    | CD9 antigen                                                                                       |
| 1416029_at   | 3.0 | Ppp4r2                 | protein phosphatase 4, regulatory subunit 2                                                       |
| 1427689_a_at | 3.0 | Car13                  | carbonic anhydrase 13                                                                             |
| 1448239_at   | 3.0 | Taf1d                  | TATA box binding protein (Tbp)-associated factor, RNA polymerase I, D                             |
| 1426810_at   | 2.9 | Ptfr                   | polymerase I and transcript release factor                                                        |
| 1423389_at   | 2.9 | Anapc5                 | anaphase-promoting complex subunit 5                                                              |
| 1427578_a_at | 2.9 | Acp12                  | acid phosphatase-like 2                                                                           |
| 1426750_at   | 2.9 |                        |                                                                                                   |

|              |     |                           |                                                                                                                   |
|--------------|-----|---------------------------|-------------------------------------------------------------------------------------------------------------------|
|              |     | EG667682 ///              |                                                                                                                   |
|              |     | ENSMUSG00000066956 ///    | predicted gene, EG667682 /// predicted gene, ENSMUSG00000066956 /// ERO1-like (S. cerevisiae) ///                 |
| 1440686_at   | 2.9 | Ero11 /// Rpl31           | ribosomal protein L31                                                                                             |
| 1415971_at   | 2.9 | Tspan3                    | tetraspanin 3                                                                                                     |
| 1418189_s_at | 2.9 | Hspa9                     | heat shock protein 9                                                                                              |
| 1427432_a_at | 2.9 | Dpysl2                    | dihydropyrimidinase-like 2                                                                                        |
| 1415881_at   | 2.9 | Cpe /// LOC100046434      | carboxypeptidase E /// similar to carboxypeptidase E                                                              |
| 1428585_at   | 2.9 | LOC100045795 /// Rsb1     | similar to mKIAA3002 protein /// rosin, round spermatid basic protein 1                                           |
| 1437495_at   | 2.9 | Trim35                    | tripartite motif-containing 35                                                                                    |
|              |     | EG665562 /// EG667682 /// |                                                                                                                   |
|              |     | EG668850 ///              |                                                                                                                   |
|              |     | ENSMUSG00000066956 ///    |                                                                                                                   |
|              |     | Ero11 /// LOC638399 ///   | predicted gene, EG665562 /// predicted gene, EG667682 /// predicted gene, EG668850 /// predicted gene,            |
|              |     | LOC673582 /// LOC675018   | ENSMUSG00000066956 /// ERO1-like (S. cerevisiae) /// similar to ribosomal protein L31 /// similar to ribosomal    |
|              |     | /// OTTMUSG00000009823    | protein L31 /// similar to ribosomal protein L31 /// predicted gene, OTTMUSG00000009823 /// ribosomal protein     |
| 1429555_at   | 2.9 | /// Rpl31                 | L31                                                                                                               |
| 1449061_a_at | 2.9 | Acaa2                     | acetyl-Coenzyme A acyltransferase 2 (mitochondrial 3-oxoacyl-Coenzyme A thiolase)                                 |
| 1459681_at   | 2.9 | Ddr2                      | discoidin domain receptor family, member 2                                                                        |
| 1433656_a_at | 2.9 | Mat2a                     | methionine adenosyltransferase II, alpha                                                                          |
| 1452406_x_at | 2.9 | Mast3                     | microtubule associated serine/threonine kinase 3                                                                  |
| 1426533_at   | 2.9 | Golim4                    | golgi integral membrane protein 4                                                                                 |
| 1443558_s_at | 2.9 | Ralgds                    | ral guanine nucleotide dissociation stimulator                                                                    |
| 1452270_s_at | 2.9 | Cercam                    | cerebral endothelial cell adhesion molecule                                                                       |
| 1439488_at   | 2.9 | Eif2s2                    | eukaryotic translation initiation factor 2, subunit 2 (beta)                                                      |
| 1418227_at   | 2.9 | Ptpre                     | protein tyrosine phosphatase, receptor type, E                                                                    |
| 1419536_a_at | 2.9 | Eya3                      | eyes absent 3 homolog (Drosophila)                                                                                |
| 1438684_at   | 2.9 | C1qbp                     | complement component 1, q subcomponent binding protein                                                            |
| 1448263_a_at | 2.9 | Prosc                     | proline synthetase co-transcribed                                                                                 |
| 1436505_at   | 2.9 | Yipf3                     | Yip1 domain family, member 3                                                                                      |
| 1424959_at   | 2.8 | Mapk3                     | mitogen-activated protein kinase 3                                                                                |
| 1448135_at   | 2.8 | Gadd45b                   | Growth arrest and DNA-damage-inducible 45 beta, mRNA (cDNA clone MGC:36156 IMAGE:5355150)                         |
| 1458148_at   | 2.8 | 6330403M23Rik             | RIKEN cDNA 6330403M23 gene                                                                                        |
| 1460177_at   | 2.8 | Nsmce1                    | Non-SMC element 1 homolog (S. cerevisiae), mRNA (cDNA clone MGC:25737 IMAGE:3984224)                              |
| 1426806_at   | 2.8 | Akr1a4                    | aldo-keto reductase family 1, member A4 (aldehyde reductase)                                                      |
| 1435402_at   | 2.8 | Map3k6                    | mitogen-activated protein kinase kinase kinase 6                                                                  |
| 1426726_at   | 2.8 | Psm1                      | proteasome (prosome, macropain) 26S subunit, non-ATPase, 1                                                        |
| 1456389_at   | 2.8 | Mib1                      | mindbomb homolog 1 (Drosophila)                                                                                   |
| 1422864_at   | 2.8 | Fasn                      | fatty acid synthase                                                                                               |
|              |     | 100042986 ///             |                                                                                                                   |
|              |     | OTTMUSG00000015874 ///    |                                                                                                                   |
| 1416187_s_at | 2.8 | Rpl37a                    | predicted gene, 100042986 /// predicted gene, OTTMUSG00000015874 /// ribosomal protein L37a                       |
|              |     | LOC100045332 ///          | similar to 37kDa oncofetal antigen /// similar to 40S ribosomal protein SA (p40) (34/67 kDa laminin receptor) /// |
| 1434384_at   | 2.8 | LOC636901 /// Rpsa        | ribosomal protein SA                                                                                              |
| 1438081_at   | 2.8 | Gabpb2                    | GA repeat binding protein, beta 2                                                                                 |
| 1434298_at   | 2.8 | Mat2b                     | methionine adenosyltransferase II, beta                                                                           |
| 1418422_at   | 2.8 | Phlda1                    | pleckstrin homology-like domain, family A, member 1                                                               |
| 1436513_at   | 2.8 | Picalm                    | phosphatidylinositol binding clathrin assembly protein                                                            |
| 1422027_a_at | 2.7 | Mgat1                     | mannoside acetylglucosaminyltransferase 1                                                                         |
| 1424533_a_at | 2.7 | Tdrd7                     | tudor domain containing 7                                                                                         |
| 1426528_at   | 2.7 | Mgat3                     | mannoside acetylglucosaminyltransferase 3                                                                         |
| 1426404_a_at | 2.7 | Tmem41b                   | transmembrane protein 41B                                                                                         |
| 1426459_s_at | 2.7 | Prpf38b                   | PRP38 pre-mRNA processing factor 38 (yeast) domain containing B                                                   |
| 1426705_s_at | 2.7 | Vezf1                     | vascular endothelial zinc finger 1                                                                                |
| 1418504_at   | 2.7 | Ero11                     | ERO1-like (S. cerevisiae)                                                                                         |
| 1435341_at   | 2.7 | Casp4 /// LOC100044206    | caspace 4, apoptosis-related cysteine peptidase /// hypothetical protein LOC100044206                             |
| 1420710_at   | 2.7 | Igf1                      | insulin-like growth factor binding protein 4                                                                      |
| 1437635_at   | 2.7 | Ivbl                      | ivB (bacterial acetolactate synthase)-like                                                                        |
| 1430786_at   | 2.7 | Igf1                      | insulin-like growth factor 1                                                                                      |
| 1419924_at   | 2.7 | Birc3                     | baculoviral IAP repeat-containing 3                                                                               |
| 1416272_at   | 2.7 | Hsp90ab1                  | heat shock protein 90 alpha (cytosolic), class B member 1                                                         |
| 1442038_at   | 2.7 | Ppargc1a                  | peroxisome proliferative activated receptor, gamma, coactivator 1 alpha                                           |
| 1435062_at   | 2.6 | Hdac6                     | histone deacetylase 6                                                                                             |
| 1420515_a_at | 2.6 | Gpr19                     | G protein-coupled receptor 19                                                                                     |
| 1417612_at   | 2.6 | Itm2b                     | integral membrane protein 2B                                                                                      |
| 1421992_a_at | 2.6 | Rab11b                    | RAB11B, member RAS oncogene family                                                                                |
| 1437176_at   | 2.6 | Prpf38b                   | PRP38 pre-mRNA processing factor 38 (yeast) domain containing B                                                   |
| 1456699_s_at | 2.6 | Cspp1                     | centrosome and spindle pole associated protein 1                                                                  |
| 1456778_at   | 2.6 | Angptl2                   | angiopoietin-like 2                                                                                               |
|              |     | LOC100044161 /// Sema3a   | hypothetical protein LOC100044161 /// sema domain, immunoglobulin domain (Ig), short basic domain,                |
| 1435400_at   | 2.6 | LOC100044161 /// Sema3a   | secreted, (semaphorin) 3A                                                                                         |
| 1434513_at   | 2.6 | Usp5                      | ubiquitin specific peptidase 5 (isopeptidase T)                                                                   |
| 1437730_at   | 2.6 | Tmem164                   | transmembrane protein 164                                                                                         |
| 1455430_at   | 2.6 | Rnf128                    | ring finger protein 128                                                                                           |
| 1421236_at   | 2.6 | Hk2                       | hexokinase 2                                                                                                      |
| 1426421_s_at | 2.5 | Nfkbil2                   | nuclear factor of kappa light polypeptide gene enhancer in B-cells inhibitor-like 2                               |
| 1434896_at   | 2.5 | Crtap                     | cartilage associated protein                                                                                      |
| 1428919_at   | 2.5 | Grip1                     | glutamate receptor interacting protein 1                                                                          |
| 1447856_x_at | 2.5 | Avil                      | adwillin                                                                                                          |
| 1428560_at   | 2.5 | Arhgap22                  | Rho GTPase activating protein 22                                                                                  |
| 1448008_at   | 2.5 | Fnip1                     | Folliculin interacting protein 1, mRNA (cDNA clone MGC:100017 IMAGE:30543296)                                     |
|              |     | H3f3a /// H3f3b ///       |                                                                                                                   |
| 1438562_a_at | 2.5 | LOC100045490              | H3 histone, family 3A /// H3 histone, family 3B /// similar to H3 histone, family 3A                              |
| 1418540_a_at | 2.5 | Htra3                     | HtrA serine peptidase 3                                                                                           |
| 1453294_at   | 2.5 | Impad1                    | inositol monophosphatase domain containing 1                                                                      |
| 1450582_at   | 2.5 | 2700049A03Rik             | RIKEN cDNA 2700049A03 gene                                                                                        |
| 1435597_at   | 2.5 | Psen1                     | presenilin 1                                                                                                      |

|              |     |                            |                                                                                                                                                                                                                                            |
|--------------|-----|----------------------------|--------------------------------------------------------------------------------------------------------------------------------------------------------------------------------------------------------------------------------------------|
| 1435155_at   | 2.5 | Lrba                       | LPS-responsive beige-like anchor                                                                                                                                                                                                           |
| 1416602_a_at | 2.5 | Pfkfb3                     | phosphofructokinase, muscle                                                                                                                                                                                                                |
| 1452154_at   | 2.5 | Sypl1                      | synaptophysin-like protein                                                                                                                                                                                                                 |
| 1436562_at   | 2.5 | Antxr1                     | anthrax toxin receptor 1                                                                                                                                                                                                                   |
| 1418369_at   | 2.5 | Pnkd                       | paroxysmal nonkinesinogenic dyskinesia                                                                                                                                                                                                     |
| 1427705_a_at | 2.5 | Espl1                      | extra spindle poles-like 1 ( <i>S. cerevisiae</i> )                                                                                                                                                                                        |
| 1416303_at   | 2.5 | M6pr                       | mannose-6-phosphate receptor, cation dependent                                                                                                                                                                                             |
| 1434238_at   | 2.5 | Ctnna1                     | catenin (cadherin associated protein), alpha 1                                                                                                                                                                                             |
| 1428861_at   | 2.4 | Lima1                      | LIM domain and actin binding 1                                                                                                                                                                                                             |
| 1440325_at   | 2.4 | Map3k4                     | mitogen-activated protein kinase kinase 4                                                                                                                                                                                                  |
| 1455567_at   | 2.4 | Gadd45b                    | growth arrest and DNA-damage-inducible 45 beta                                                                                                                                                                                             |
| 1429618_at   | 2.4 | Brd3                       | bromodomain containing 3                                                                                                                                                                                                                   |
| 1447728_x_at | 2.4 | Tuba1a                     | tubulin, alpha 1A                                                                                                                                                                                                                          |
|              |     | 1500003O03Rik ///          |                                                                                                                                                                                                                                            |
| 1419400_at   | 2.4 | LOC100048622               | RIKEN cDNA 1500003O03 gene ///<br>similar to EF-hand Ca <sup>2+</sup> binding protein p22                                                                                                                                                  |
| 1426419_at   | 2.4 | Mrp141                     | mitochondrial ribosomal protein L41                                                                                                                                                                                                        |
| 1416186_at   | 2.4 | Sipa1                      | signal-induced proliferation associated gene 1                                                                                                                                                                                             |
| 1444086_at   | 2.4 | Soat2                      | sterol O-acyltransferase 2                                                                                                                                                                                                                 |
| 1458439_a_at | 2.4 | Crkrs                      | CDC2-related kinase, arginine/serine-rich                                                                                                                                                                                                  |
| 1430147_a_at | 2.4 | Lrw1                       | leucine-rich repeats and WD repeat domain containing 1                                                                                                                                                                                     |
| 1440868_at   | 2.4 | Cndp2                      | CNDP dipeptidase 2 (metallopeptidase M20 family)                                                                                                                                                                                           |
| 1452967_at   | 2.4 | Tanc2                      | tetratricopeptide repeat, ankyrin repeat and coiled-coil containing 2                                                                                                                                                                      |
| 1434660_at   | 2.4 | Pcolce                     | procollagen C-endopeptidase enhancer protein                                                                                                                                                                                               |
| 1444644_x_at | 2.4 | Fry1                       | furry homolog-like ( <i>Drosophila</i> )                                                                                                                                                                                                   |
| 1434005_at   | 2.4 | Lrp8                       | low density lipoprotein receptor-related protein 8, apolipoprotein e receptor                                                                                                                                                              |
| 1429907_at   | 2.4 | Gsn                        | gelsolin                                                                                                                                                                                                                                   |
| 1428666_at   | 2.4 | Atp5j2                     | ATP synthase, H <sup>+</sup> transporting, mitochondrial F0 complex, subunit f, isoform 2                                                                                                                                                  |
| 1422033_a_at | 2.4 | Tubb2c                     | tubulin, beta 2c                                                                                                                                                                                                                           |
| 1456791_at   | 2.4 | Ddx46                      | DEAD (Asp-Glu-Ala-Asp) box polypeptide 46                                                                                                                                                                                                  |
| 1419354_at   | 2.4 | Rel                        | reticuloendotheliosis oncogene                                                                                                                                                                                                             |
| 1436350_at   | 2.4 | Pias3                      | protein inhibitor of activated STAT 3                                                                                                                                                                                                      |
| 1436073_at   | 2.4 | Gadd45b                    | growth arrest and DNA-damage-inducible 45 beta                                                                                                                                                                                             |
| 1449217_at   | 2.4 | Zcchc24                    | zinc finger, CCHC domain containing 24                                                                                                                                                                                                     |
| 1421499_a_at | 2.4 | Vcp                        | valosin containing protein                                                                                                                                                                                                                 |
| 1424752_x_at | 2.4 | Jmjd1a                     | jumonji domain containing 1A                                                                                                                                                                                                               |
| 1434687_at   | 2.4 | Ripk3                      | receptor-interacting serine-threonine kinase 3                                                                                                                                                                                             |
| 1427521_a_at | 2.3 | Cldn12                     | claudin 12                                                                                                                                                                                                                                 |
| 1420673_a_at | 2.3 | Trim44                     | tripartite motif-containing 44                                                                                                                                                                                                             |
| 1448801_a_at | 2.3 | Pcf11                      | cleavage and polyadenylation factor subunit homolog ( <i>S. cerevisiae</i> )                                                                                                                                                               |
| 1425969_a_at | 2.3 | 1600012H06Rik              | RIKEN cDNA 1600012H06 gene                                                                                                                                                                                                                 |
| 1433555_at   | 2.3 | Slc9a3r1                   | solute carrier family 9 (sodium/hydrogen exchanger), member 3 regulator 1                                                                                                                                                                  |
| 1435546_a_at | 2.3 | Capp                       | capping protein (actin filament), gelsolin-like                                                                                                                                                                                            |
|              |     | ENSMUSG00000050347 ///     |                                                                                                                                                                                                                                            |
| 1429491_s_at | 2.3 | Tmsb10                     | predicted gene, ENSMUSG00000050347 ///<br>thymosin, beta 10                                                                                                                                                                                |
| 1416432_at   | 2.3 | Rad52                      | RAD52 homolog ( <i>S. cerevisiae</i> )                                                                                                                                                                                                     |
| 1429085_at   | 2.3 | Sgms1                      | sphingomyelin synthase 1                                                                                                                                                                                                                   |
| 1434938_at   | 2.3 | Dhcr7                      | 7-dehydrocholesterol reductase                                                                                                                                                                                                             |
| 1425681_a_at | 2.3 | Mycbp                      | c-myc binding protein                                                                                                                                                                                                                      |
| 1427057_at   | 2.3 | Scap                       | SREBF chaperone                                                                                                                                                                                                                            |
| 1432161_a_at | 2.3 | Pitpmn1                    | phosphatidylinositol transfer protein, membrane-associated 1                                                                                                                                                                               |
| 1436180_at   | 2.2 | Mboat7                     | membrane bound O-acyltransferase domain containing 7                                                                                                                                                                                       |
|              |     | EG664868 ///               |                                                                                                                                                                                                                                            |
|              |     | OTTMUSG00000009978 ///     |                                                                                                                                                                                                                                            |
| 1426990_at   | 2.2 | Rpl38                      | predicted gene, EG664868 ///<br>predicted gene, OTTMUSG00000009978 ///<br>ribosomal protein L38                                                                                                                                            |
| 1421344_a_at | 2.2 | Foxa2                      | forkhead box A2                                                                                                                                                                                                                            |
| 1434941_s_at | 2.2 | Ralbp1                     | ralA binding protein 1                                                                                                                                                                                                                     |
| 1417393_a_at | 2.2 | Scly                       | selenocysteine lyase                                                                                                                                                                                                                       |
| 1434530_at   | 2.2 | G6pdx                      | glucose-6-phosphate dehydrogenase X-linked                                                                                                                                                                                                 |
| 1430416_at   | 2.2 | Cblb                       | Casitas B-lineage lymphoma b                                                                                                                                                                                                               |
| 1452866_at   | 2.2 | Dnajc5                     | DnaJ (Hsp40) homolog, subfamily C, member 5                                                                                                                                                                                                |
| 1427120_at   | 2.2 | Mat2a                      | methionine adenosyltransferase II, alpha                                                                                                                                                                                                   |
| 1419241_a_at | 2.2 | Hspa8                      | heat shock protein 8                                                                                                                                                                                                                       |
| 1437850_a_at | 2.2 | Serf1                      | small EDRK-rich factor 1                                                                                                                                                                                                                   |
| 1428390_at   | 2.2 | Hsd17b11                   | hydroxysteroid (17-beta) dehydrogenase 11                                                                                                                                                                                                  |
| 1432103_a_at | 2.2 | Kif22                      | kinesin family member 22                                                                                                                                                                                                                   |
| 1453198_at   | 2.2 | AI451557                   | expressed sequence AI451557                                                                                                                                                                                                                |
| 1424124_at   | 2.2 | Sh3glb2                    | SH3-domain GRB2-like endophilin B2                                                                                                                                                                                                         |
| 1418661_at   | 2.2 | Rela                       | v-rel reticuloendotheliosis viral oncogene homolog A (avian)<br>chemokine (C-X-C motif) ligand 10 ///<br>similar to Small inducible cytokine B10 precursor (CXCL10) (Interferon-<br>gamma-induced protein CRG-2) (Gamma-IP10) (IP-10) (C7) |
| 1418465_at   | 2.2 | Cxcl10 ///<br>LOC100045000 |                                                                                                                                                                                                                                            |
| 1426291_at   | 2.2 | Arhgap21                   | Rho GTPase activating protein 21                                                                                                                                                                                                           |
| 1427470_s_at | 2.2 | Casc4                      | cancer susceptibility candidate 4                                                                                                                                                                                                          |
| 1428389_s_at | 2.2 | Rhpn2                      | rhopilin, Rho GTPase binding protein 2                                                                                                                                                                                                     |
| 1439497_at   | 2.2 | Anapc5                     | anaphase-promoting complex subunit 5                                                                                                                                                                                                       |
| 1428438_s_at | 2.2 | 4933439C20Rik              | RIKEN cDNA 4933439C20 gene                                                                                                                                                                                                                 |
| 1423991_at   | 2.2 | Ski                        | ski sarcoma viral oncogene homolog (avian)                                                                                                                                                                                                 |
| 1455046_a_at | 2.2 | Ms4a2                      | membrane-spanning 4-domains, subfamily A, member 2                                                                                                                                                                                         |
| 1426954_at   | 2.2 | Abtb2                      | ankyrin repeat and BTB (POZ) domain containing 2                                                                                                                                                                                           |
| 1426928_at   | 2.2 | Pigs                       | phosphatidylinositol glycan anchor biosynthesis, class S                                                                                                                                                                                   |
| 1441266_at   | 2.2 | Msln                       | mesothelin                                                                                                                                                                                                                                 |
| 1456865_x_at | 2.2 | Lsm14b                     | LSM14 homolog B (SCD6, <i>S. cerevisiae</i> )                                                                                                                                                                                              |
| 1450703_at   | 2.2 | 1110002E22Rik              | RIKEN cDNA 1110002E22 gene                                                                                                                                                                                                                 |
| 1416419_s_at | 2.2 | Mum1                       | melanoma associated antigen (mutated) 1                                                                                                                                                                                                    |
| 1440815_x_at | 2.1 | Lasp1                      | LIM and SH3 protein 1                                                                                                                                                                                                                      |
| 1444076_at   | 2.1 | Svil                       | supervillin                                                                                                                                                                                                                                |
| 1417964_at   | 2.1 | Loxl3                      | lysyl oxidase-like 3                                                                                                                                                                                                                       |

|              |     |                         |                                                                                                |
|--------------|-----|-------------------------|------------------------------------------------------------------------------------------------|
| 1435240_at   | 2.1 | Casp8ap2                | caspase 8 associated protein 2                                                                 |
| 1418255_s_at | 2.1 | Clu                     | clusterin                                                                                      |
| 1451225_at   | 2.1 | Taf2                    | TAF2 RNA polymerase II, TATA box binding protein (TBP)-associated factor                       |
| 1437563_at   | 2.1 | Dgkd                    | diacylglycerol kinase, delta                                                                   |
| 1415799_at   | 2.1 | Nptn                    | neuroplastin                                                                                   |
| 1456844_at   | 2.1 | Tmem130                 | transmembrane protein 130                                                                      |
| 1454953_at   | 2.1 | EG666481 /// LOC624112  | predicted gene, EG666481 /// hypothetical protein LOC624112                                    |
| 1450934_at   | 2.1 | Baz1a                   | bromodomain adjacent to zinc finger domain 1A                                                  |
| 1454982_at   | 2.1 | Bicc1                   | bicaudal C homolog 1 (Drosophila)                                                              |
| 1455643_s_at | 2.1 | Serpib9c                | serine (or cysteine) peptidase inhibitor, clade B, member 9c                                   |
| 1450790_at   | 2.1 | Zfp433                  | RIKEN cDNA 1700123A16 gene                                                                     |
| 1435091_at   | 2.1 | Plscr2                  | phospholipid scramblase 2                                                                      |
| 1416861_at   | 2.1 | Efemp2                  | epidermal growth factor-containing fibulin-like extracellular matrix protein 2                 |
| 1417712_at   | 2.1 | Stmn4                   | stathmin-like 4                                                                                |
| 1426083_a_at | 2.1 | Ankrd16                 | ankyrin repeat domain 16                                                                       |
| 1423799_at   | 2.1 | Prnd                    | prion protein dublet                                                                           |
| 1418429_at   | 2.1 | Fanca                   | Fanconi anemia, complementation group A                                                        |
| 1416749_at   | 2.1 | Bub1b                   | budding uninhibited by benzimidazoles 1 homolog, beta (S. cerevisiae)                          |
| 1435039_a_at | 2.1 | Rassf1                  | Ras association (RalGDS/AF-6) domain family member 1                                           |
| 1456284_at   | 2.0 | B230216N24Rik           | RIKEN cDNA B230216N24 gene                                                                     |
| 1422054_a_at | 2.0 | Pdia6                   | protein disulfide isomerase associated 6                                                       |
| 1455988_a_at | 2.0 | Cad                     | carbamoyl-phosphate synthetase 2, aspartate transcarbamylase, and dihydroorotase               |
| 1436129_at   | 2.0 | Dvl1                    | dishevelled, dsh homolog 1 (Drosophila)                                                        |
| 1455314_at   | 2.0 | 1810026B05Rik           | PREDICTED: Mus musculus RIKEN cDNA 1810026B05 gene, transcript variant 2 (1810026B05Rik), mRNA |
| 1431424_at   | 2.0 | Cd151                   | CD151 antigen                                                                                  |
| 1454655_at   | 2.0 | Gpd1l                   | glycerol-3-phosphate dehydrogenase 1-like                                                      |
| 1423798_a_at | 2.0 | Ccdc23                  | coiled-coil domain containing 23                                                               |
| 1435434_at   | 2.0 | Fzd7                    | frizzled homolog 7 (Drosophila)                                                                |
| 1428366_at   | 2.0 | Bola2                   | bolA-like 2 (E. coli)                                                                          |
| 1416274_at   | 2.0 | LOC674712 /// Ptdss1    | similar to phosphatidylserine synthase 1 /// phosphatidylserine synthase 1                     |
| 1421153_at   | 2.0 | Rnase4                  | ribonuclease, RNase A family 4                                                                 |
| 1447346_s_at | 2.0 | Sox2                    | SRY-box containing gene 2                                                                      |
| 1433926_at   | 2.0 | Rabep2                  | rabaptin, RAB GTPase binding effector protein 2                                                |
| 1453048_at   | 2.0 | Sfxn5                   | sideroflexin 5                                                                                 |
| 1435875_at   | 2.0 | F2r                     | coagulation factor II (thrombin) receptor                                                      |
| 1440020_at   | 2.0 | BC066028                | cDNA sequence BC066028                                                                         |
| 1424886_at   | 2.0 | Arhgap18                | Rho GTPase activating protein 18                                                               |
| 1419010_x_at | 2.0 | Kif3a                   | kinesin family member 3A                                                                       |
| 1433599_at   | 2.0 | Htra1                   | HtrA serine peptidase 1                                                                        |
| 1435224_at   | 1.9 | St3gal5                 | ST3 beta-galactoside alpha-2,3-sialyltransferase 5                                             |
| 1420220_x_at | 1.9 | Sytl2                   | synaptotagmin-like 2                                                                           |
| 1454074_a_at | 1.9 | H2afz                   | H2A histone family, member Z                                                                   |
| 1449014_at   | 1.9 | Adam10                  | a disintegrin and metallopeptidase domain 10                                                   |
| 1433782_at   | 1.9 | Abhd4                   | abhydrolase domain containing 4                                                                |
| 1426365_at   | 1.9 | Lsm14a                  | LSM14 homolog A (SCD6, S. cerevisiae)                                                          |
| 1417671_at   | 1.9 | Rtn3                    | reticulon 3                                                                                    |
| 1457200_at   | 1.9 | Abcg1                   | ATP-binding cassette, sub-family G (WHITE), member 1                                           |
| 1439620_at   | 1.9 | Qars                    | glutamyl-tRNA synthetase                                                                       |
| 1450978_at   | 1.9 | Ntrk3                   | neurotrophic tyrosine kinase, receptor, type 3                                                 |
| 1455765_a_at | 1.9 | Lpcat1                  | lysophosphatidylcholine acyltransferase 1                                                      |
| 1427285_s_at | 1.9 | Ermp1                   | endoplasmic reticulum metallopeptidase 1                                                       |
| 1460547_a_at | 1.9 | H60a                    | histocompatibility 60a                                                                         |
| 1456711_at   | 1.9 | Ckap4                   | cytoskeleton-associated protein 4                                                              |
| 1436885_a_at | 1.9 | Ckap4                   | cytoskeleton-associated protein 4                                                              |
| 1435174_at   | 1.9 | Chst1                   | carbohydrate (keratan sulfate Gal-6) sulfotransferase 1                                        |
| 1460404_at   | 1.9 | Serpib9d                | serine (or cysteine) peptidase inhibitor, clade B, member 9d                                   |
| 1448270_at   | 1.9 | 6720475J19Rik           | RIKEN cDNA 6720475J19 gene                                                                     |
| 1459765_s_at | 1.9 | Tubb5                   | tubulin, beta 5                                                                                |
| 1424769_s_at | 1.9 | Jup                     | junction plakoglobin                                                                           |
| 1448190_at   | 1.9 | Sys1                    | SYS1 Golgi-localized integral membrane protein homolog (S. cerevisiae)                         |
| 1438251_x_at | 1.9 | Ids                     | iduronate 2-sulfatase                                                                          |
| 1428210_s_at | 1.9 | Zfp664                  | zinc finger protein 664                                                                        |
| 1436764_at   | 1.9 | Mgat2                   | mannoside acetylglucosaminyltransferase 2                                                      |
| 1455261_at   | 1.9 | 1110002E22Rik           | RIKEN cDNA 1110002E22 gene                                                                     |
| 1429400_at   | 1.9 | Cherp                   | calcium homeostasis endoplasmic reticulum protein                                              |
| 1456700_x_at | 1.9 | Stard4                  | StAR-related lipid transfer (START) domain containing 4                                        |
| 1434080_at   | 1.9 | Mcm6                    | minichromosome maintenance deficient 6 (MIS5 homolog, S. pombe) (S. cerevisiae)                |
| 1447779_x_at | 1.8 | Phf201l                 | PHD finger protein 20-like 1                                                                   |
| 1428138_s_at | 1.8 | Kat2b                   | K(lysine) acetyltransferase 2B                                                                 |
| 1419558_at   | 1.8 | Ankrd1                  | ankyrin repeat domain 1 (cardiac muscle)                                                       |
| 1416998_at   | 1.8 | Fam114a1                | family with sequence similarity 114, member A1                                                 |
| 1425774_at   | 1.8 | Rnft1                   | ring finger protein, transmembrane 1                                                           |
| 1428137_at   | 1.8 | Zfp692                  | zinc finger protein 692                                                                        |
| 1426420_at   | 1.8 | LOC100040573 /// Zfp131 | similar to putative transcription factor ZNF131 /// zinc finger protein 131                    |
| 1437984_x_at | 1.8 | Kif21a                  | kinesin family member 21A                                                                      |
| 1429774_a_at | 1.8 | EG637273 /// Prdx1      | predicted gene, EG637273 /// peroxiredoxin 1                                                   |
| 1426671_a_at | 1.8 | Pon2                    | paraoxonase 2                                                                                  |
| 1425495_at   | 1.8 | 9930023K05Rik           | RIKEN cDNA 9930023K05 gene                                                                     |
| 1455821_x_at | 1.8 | Nisch                   | nischarin                                                                                      |
| 1437851_x_at | 1.8 | Tacc1                   | transforming, acidic coiled-coil containing protein 1                                          |
| 1436174_at   | 1.8 | Tkt                     | transketolase                                                                                  |
| 1457473_at   | 1.8 | Itgb3                   | integrin beta 3                                                                                |
| 1448221_at   | 1.8 | Arhgef2                 | rho/rac guanine nucleotide exchange factor (GEF) 2                                             |
| 1450711_at   | 1.8 | Entpd7                  | ectonucleoside triphosphate diphosphohydrolase 7                                               |
| 1460315_s_at | 1.8 | Mrip                    | myosin phosphatase Rho interacting protein                                                     |
| 1459804_at   | 1.8 | Slc29a3                 | solute carrier family 29 (nucleoside transporters), member 3                                   |

|              |      |                             |                                                                                                                     |
|--------------|------|-----------------------------|---------------------------------------------------------------------------------------------------------------------|
|              |      | ENSMUSG00000074460 ///      |                                                                                                                     |
| 1438750_at   | 1.8  | Tmed2                       | predicted gene, ENSMUSG00000074460 /// transmembrane emp24 domain trafficking protein 2                             |
| 1455725_a_at | 1.8  | Bcap31                      | B-cell receptor-associated protein 31                                                                               |
| 1436570_at   | 1.8  | Rheb1l                      | Ras homolog enriched in brain like 1                                                                                |
| 1437304_at   | 1.8  | Tmem50a                     | transmembrane protein 50A                                                                                           |
| 1428682_at   | 1.7  | Cpne3                       | copine III                                                                                                          |
| 1435338_at   | 1.7  | Tns1                        | tensin 1                                                                                                            |
| 1455711_at   | 1.7  | Cdc42ep3                    | CDC42 effector protein (Rho GTPase binding) 3                                                                       |
| 1417771_a_at | 1.7  | LOC100046044 /// Nr2f1      | similar to COUP-TFI /// nuclear receptor subfamily 2, group F, member 1                                             |
| 1442892_at   | 1.7  | Cpt1a                       | carnitine palmitoyltransferase 1a, liver                                                                            |
| 1458163_at   | 1.7  | Bcr                         | breakpoint cluster region                                                                                           |
| 1457769_at   | 1.7  | Plcxd2                      | phosphatidylinositol-specific phospholipase C, X domain containing 2                                                |
| 1415711_at   | 1.7  | LOC100044471 /// Sap30l     | similar to SAP30-like /// SAP30-like                                                                                |
| 1417022_at   | 1.7  | Psrc1                       | proline/serine-rich coiled-coil 1                                                                                   |
| 1435520_at   | 1.7  | Ripk2                       | receptor (TNFRSF)-interacting serine-threonine kinase 2                                                             |
| 1433447_x_at | 1.7  | Ctnna1                      | catenin (cadherin associated protein), alpha 1                                                                      |
| 1438148_at   | 1.7  | Ano6                        | anoctamin 6                                                                                                         |
| 1426818_at   | 1.7  | Sulf2                       | sulfatase 2                                                                                                         |
| 1434904_at   | 1.7  | Sod2                        | superoxide dismutase 2, mitochondrial                                                                               |
|              |      | Hist1h2bb /// Hist1h2bc /// |                                                                                                                     |
|              |      | Hist1h2be /// Hist1h2bg /// |                                                                                                                     |
|              |      | LOC665622 /// RP23-         | histone cluster 1, H2bb /// histone cluster 1, H2bc /// histone cluster 1, H2be /// histone cluster 1, H2bg /// H2b |
| 1447556_x_at | 1.7  | 38E20.1                     | histone family member /// predicted gene, OTTMUSG00000013203                                                        |
| 1456405_at   | 1.7  | Alg10b                      | asparagine-linked glycosylation 10 homolog B (yeast, alpha-1,2-glucosyltransferase)                                 |
| 1420933_a_at | 1.7  | Skil                        | SKI-like                                                                                                            |
| 1434082_at   | 1.7  | Bat1a                       | HLA-B-associated transcript 1A                                                                                      |
| 1421240_at   | 1.7  | Tlr3                        | toll-like receptor 3                                                                                                |
| 1438606_a_at | 1.7  | Abcc8                       | ATP-binding cassette, sub-family C (CFTR/MRP), member 8                                                             |
| 1436074_at   | 1.7  | Ndrp1                       | N-myc downstream regulated gene 1                                                                                   |
| 1443264_at   | 1.7  | Kank2                       | KN motif and ankyrin repeat domains 2                                                                               |
| 1433654_at   | 1.7  | Pgd                         | phosphogluconate dehydrogenase                                                                                      |
| 1455389_s_at | 1.6  | Mlec                        | malectin                                                                                                            |
| 1428616_at   | 1.6  | Cpt1c                       | carnitine palmitoyltransferase 1c                                                                                   |
| 1422945_a_at | 1.6  | Mphosph6                    | M phase phosphoprotein 6                                                                                            |
| 1457596_at   | 1.6  | Luc7l                       | Luc7 homolog (S. cerevisiae)-like                                                                                   |
| 1444521_at   | 1.6  | Riok3                       | RIO kinase 3 (yeast)                                                                                                |
| 1460597_at   | 1.6  | Crebbp                      | CREB binding protein                                                                                                |
| 1427088_at   | 1.6  | Slc45a4                     | solute carrier family 45, member 4                                                                                  |
| 1426286_at   | 1.6  | Atp13a2                     | ATPase type 13A2                                                                                                    |
| 1456083_x_at | 1.6  | Zfp251                      | zinc finger protein 251                                                                                             |
| 1415723_at   | 1.6  | 5730453l16Rik               | RIKEN cDNA 5730453l16 gene                                                                                          |
| 1449158_at   | 1.6  | Wdr43                       | WD repeat domain 43                                                                                                 |
| 1420958_at   | 1.6  | Dbi                         | diazepam binding inhibitor                                                                                          |
| 1447292_at   | 1.6  | Sfrs6                       | splicing factor, arginine/serine-rich 6                                                                             |
| 1415730_at   | 1.6  | Tmem165                     | transmembrane protein 165                                                                                           |
| 1433697_at   | 1.5  | Atp13a4 /// LOC637970       | ATPase type 13A4 /// similar to type V P-type ATPase isoform 4                                                      |
| 1452091_a_at | 1.5  | Ptgfrn                      | prostaglandin F2 receptor negative regulator                                                                        |
| 1440289_at   | 1.5  | Sf1                         | splicing factor 1                                                                                                   |
| 1441751_at   | 1.5  | Clca1 /// Clca2             | chloride channel calcium activated 1 /// chloride channel calcium activated 2                                       |
|              |      | EG665562 /// EG667682 ///   |                                                                                                                     |
|              |      | ENSMUSG00000066956 ///      | predicted gene, EG665562 /// predicted gene, EG667682 /// predicted gene, ENSMUSG00000066956 /// similar            |
|              |      | LOC638399 /// LOC673582     | to ribosomal protein L31 /// similar to ribosomal protein L31 /// similar to ribosomal protein L31 /// ribosomal    |
| 1425957_x_at | 1.5  | /// LOC675018 /// Rpl31     | protein L31                                                                                                         |
| 1459916_at   | 1.5  | 4930427A07Rik               | RIKEN cDNA 4930427A07 gene                                                                                          |
| 1433925_at   | 1.5  | LOC100048538 /// Prss27     | similar to protease, serine 27 /// protease, serine 27                                                              |
| 1447366_at   | 1.5  | Ccnd1                       | cyclin D1                                                                                                           |
| 1436454_x_at | 1.5  | Edem1                       | ER degradation enhancer, mannosidase alpha-like 1                                                                   |
| 1443524_x_at | 1.5  | Hisppd2a                    | histidine acid phosphatase domain containing 2A                                                                     |
| 1435951_at   | 1.5  | Eif4a2                      | eukaryotic translation initiation factor 4A2                                                                        |
| 1426924_at   | 1.4  | Cox7a2l                     | cytochrome c oxidase subunit VIIa polypeptide 2-like                                                                |
| 1419920_s_at | 1.4  | S100a6                      | S100 calcium binding protein A6 (calcylin)                                                                          |
|              |      | LOC100047187 /// Mbtps2 /// | similar to zinc finger, X-linked, duplicated B /// membrane-bound transcription factor peptidase, site 2 /// Yy2    |
| 1453334_at   | 1.4  | Yy2                         | transcription factor                                                                                                |
| 1430499_at   | 1.4  | F2r                         | coagulation factor II (thrombin) receptor                                                                           |
| 1431180_at   | 1.4  | Eif2b2                      | eukaryotic translation initiation factor 2B, subunit 2 beta                                                         |
| 1416941_s_at | 1.4  | Psme1                       | proteasome (prosome, macropain) 28 subunit, alpha                                                                   |
| 1421466_at   | 1.4  | Abcg2                       | ATP-binding cassette, sub-family G (WHITE), member 2                                                                |
| 1444023_at   | 1.3  | Ehmt2                       | euchromatic histone lysine N-methyltransferase 2                                                                    |
| 1439555_at   | 1.3  | Ythdc1                      | YTH domain containing 1                                                                                             |
| 1449323_a_at | 1.3  | 9430020K01Rik               | RIKEN cDNA 9430020K01 gene                                                                                          |
| 1437428_x_at | 1.2  | Tmem77                      | transmembrane protein 77                                                                                            |
| 1447997_s_at | 1.2  | Usp7                        | ubiquitin specific peptidase 7                                                                                      |
| 1447756_x_at | 1.2  | Rassf7                      | Ras association (RalGDS/AF-6) domain family (N-terminal) member 7                                                   |
| 1415701_x_at | -1.3 | Rpl23                       | ribosomal protein L23                                                                                               |
| 1433472_x_at | -1.3 | Bat1a                       | HLA-B-associated transcript 1A                                                                                      |
| 1429595_at   | -1.3 | Nelf                        | nasal embryonic LHRH factor                                                                                         |
| 1460680_a_at | -1.4 | Hnrmpk                      | heterogeneous nuclear ribonucleoprotein K                                                                           |
| 1438174_x_at | -1.4 | D630045J12Rik               | RIKEN cDNA D630045J12 gene                                                                                          |
| 1434588_x_at | -1.4 | Ulk1                        | Unc-51 like kinase 1 (C. elegans)                                                                                   |
| 1423455_at   | -1.4 | Leprot                      | leptin receptor overlapping transcript                                                                              |
| 1455578_x_at | -1.4 | Casp3                       | caspase 3                                                                                                           |
| 1436795_at   | -1.4 | Rbm28                       | RNA binding motif protein 28                                                                                        |
|              |      | ENSMUSG00000050347 ///      |                                                                                                                     |
| 1430123_a_at | -1.5 | LOC100048142 /// Tmsb10     | predicted gene, ENSMUSG00000050347 /// similar to thymosin, beta 10 /// thymosin, beta 10                           |
| 1424635_at   | -1.5 | LOC677319 /// Ppp1r10       | similar to protein phosphatase 1, regulatory subunit 10 /// protein phosphatase 1, regulatory subunit 10            |
| 1452774_at   | -1.5 | Chml                        | choroideremia-like                                                                                                  |



|              |      |                        |                                                                                                             |
|--------------|------|------------------------|-------------------------------------------------------------------------------------------------------------|
| 1423429_at   | -1.5 | Nup93                  | nucleoporin 93                                                                                              |
| 1425195_a_at | -1.5 | Malat1                 | metastasis associated lung adenocarcinoma transcript 1 (non-coding RNA)                                     |
| 1426660_x_at | -1.5 | Uba6                   | ubiquitin-like modifier activating enzyme 6                                                                 |
| 1460008_x_at | -1.5 | Rod1                   | ROD1 regulator of differentiation 1 (S. pombe)                                                              |
| 1435885_s_at | -1.5 | Rad54l                 | RAD54 like (S. cerevisiae)                                                                                  |
| 1426659_a_at | -1.5 | Canx                   | calnexin                                                                                                    |
| 1452156_a_at | -1.5 | Zfp568                 | zinc finger protein 568                                                                                     |
| 1454776_at   | -1.5 | Car13                  | carbonic anhydrase 13                                                                                       |
| 1436924_x_at | -1.5 | Iqsec1                 | IQ motif and Sec7 domain 1                                                                                  |
| 1439069_a_at | -1.6 | Tmem109                | transmembrane protein 109                                                                                   |
| 1416415_a_at | -1.6 | Pnpla6                 | patatin-like phospholipase domain containing 6                                                              |
| 1417665_a_at | -1.6 | Nrp1                   | neuropilin 1                                                                                                |
| 1428212_x_at | -1.6 | Aebp2                  | AE binding protein 2                                                                                        |
| 1422623_x_at | -1.6 | Usp20                  | ubiquitin specific peptidase 20                                                                             |
|              |      | 100042986 ///          |                                                                                                             |
|              |      | OTTMUSG00000015874 /// |                                                                                                             |
| 1442905_at   | -1.6 | Rpl37a                 | predicted gene, 100042986 /// predicted gene, OTTMUSG00000015874 /// ribosomal protein L37a                 |
| 1421870_at   | -1.6 | Tead1                  | TEA domain family member 1                                                                                  |
| 1429304_at   | -1.6 | Rnf26                  | ring finger protein 26                                                                                      |
| 1435081_at   | -1.6 | Rbpj                   | recombination signal binding protein for immunoglobulin kappa J region                                      |
| 1437975_a_at | -1.6 | Smad3                  | MAD homolog 3 (Drosophila)                                                                                  |
| 1426752_at   | -1.6 | Pcmdt1                 | protein-L-isoaspartate (D-aspartate) O-methyltransferase domain containing 1                                |
| 1435025_at   | -1.6 | Timm44                 | translocase of inner mitochondrial membrane 44                                                              |
| 1428369_s_at | -1.6 | EG620313 ///           | predicted gene, EG620313 /// tubulin cofactor a                                                             |
| 1434612_s_at | -1.6 | Lgals3bp               | lectin, galactoside-binding, soluble, 3 binding protein                                                     |
| 1448245_at   | -1.6 | Rpl41                  | ribosomal protein L41                                                                                       |
| 1417810_a_at | -1.6 | Malat1                 | metastasis associated lung adenocarcinoma transcript 1 (non-coding RNA)                                     |
| 1453729_a_at | -1.6 | Rarres1                | retinoic acid receptor responder (tazarotene induced) 1                                                     |
| 1416539_at   | -1.6 | Htra1                  | HtrA serine peptidase 1                                                                                     |
| 1416385_a_at | -1.6 | Rpn1                   | ribophorin I                                                                                                |
| 1455819_at   | -1.7 | Iars                   | isoleucine-tRNA synthetase                                                                                  |
| 1416520_x_at | -1.7 | Cks1b                  | CDC28 protein kinase 1b                                                                                     |
| 1429229_s_at | -1.7 | Hadh                   | hydroxyacyl-Coenzyme A dehydrogenase                                                                        |
| 1433935_at   | -1.7 | Gabpb2                 | GA repeat binding protein, beta 2                                                                           |
| 1426812_a_at | -1.7 | Rps21                  | ribosomal protein S21                                                                                       |
| 1415821_at   | -1.7 | Elovl5                 | ELOVL family member 5, elongation of long chain fatty acids (yeast)                                         |
| 1416996_at   | -1.7 | Fah                    | fumarylacetoacetate hydrolase                                                                               |
| 1439253_x_at | -1.7 | Cd151                  | CD151 antigen                                                                                               |
| 1460387_a_at | -1.7 | AI256396               | EST AI256396                                                                                                |
| 1437393_at   | -1.7 | Plp2                   | proteolipid protein 2                                                                                       |
| 1418000_a_at | -1.7 | Rnf128                 | ring finger protein 128                                                                                     |
| 1434517_at   | -1.7 | Gstm1                  | glutathione S-transferase, mu 1                                                                             |
| 1438092_x_at | -1.7 | Itga3                  | integrin alpha 3                                                                                            |
| 1415758_at   | -1.7 | Wbp11                  | WW domain binding protein 11                                                                                |
| 1455968_x_at | -1.7 | Zdhhc2                 | zinc finger, DHHC domain containing 2                                                                       |
| 1436452_x_at | -1.7 | Ppap2c                 | phosphatidic acid phosphatase type 2c                                                                       |
| 1424656_s_at | -1.7 | Phf17                  | PHD finger protein 17                                                                                       |
| 1419637_s_at | -1.7 | Jak2                   | Janus kinase 2                                                                                              |
| 1452331_s_at | -1.7 | Plcxd2                 | phosphatidylinositol-specific phospholipase C, X domain containing 2                                        |
| 1454989_at   | -1.7 | Strn3                  | Striatin, calmodulin binding protein 3 (Strn3), mRNA                                                        |
| 1426904_s_at | -1.7 | Sh3gl3                 | SH3-domain GRB2-like 3                                                                                      |
| 1433822_x_at | -1.7 | Cdc20                  | cell division cycle 20 homolog (S. cerevisiae)                                                              |
| 1460736_at   | -1.7 | A230054D04Rik          | RIKEN cDNA A230054D04 gene                                                                                  |
|              |      |                        | dolichyl-phosphate (UDP-N-acetylglucosamine) acetylglucosaminophosphotransferase 1 (GlcNAc-1-P transferase) |
| 1434889_at   | -1.7 | Dpagt1                 | Jumonji domain containing 3, mRNA (cDNA clone IMAGE:1378940)                                                |
| 1454925_x_at | -1.7 | Jmj3d3                 | YY1 transcription factor                                                                                    |
| 1452746_at   | -1.8 | Yy1                    | YY1 transcription factor                                                                                    |
| 1422443_at   | -1.8 | BC017643               | cDNA sequence BC017643                                                                                      |
| 1415833_x_at | -1.8 | Trim28                 | tripartite motif-containing 28                                                                              |
| 1439436_x_at | -1.8 | Prkar2b                | protein kinase, cAMP dependent regulatory, type II beta                                                     |
|              |      | 1200015M12Rik ///      |                                                                                                             |
|              |      | 1200016E24Rik ///      |                                                                                                             |
|              |      | A130040M12Rik ///      | RIKEN cDNA 1200015M12 gene /// RIKEN cDNA 1200016E24 gene /// RIKEN cDNA A130040M12 gene ///                |
| 1428564_at   | -1.8 | E430024C06Rik          | RIKEN cDNA E430024C06 gene                                                                                  |
| 1446868_at   | -1.8 | Tnfaip2                | tumor necrosis factor, alpha-induced protein 2                                                              |
| 1430288_x_at | -1.8 | Fosl2 ///              | fos-like antigen 2 /// similar to fos-like antigen 2                                                        |
| 1426576_at   | -1.8 | Tmem57                 | transmembrane protein 57                                                                                    |
| 1428939_s_at | -1.8 | Nfkbid                 | nuclear factor of kappa light polypeptide gene enhancer in B-cells inhibitor, delta                         |
| 1424052_at   | -1.8 | Rnf11                  | ring finger protein 11                                                                                      |
| 1418031_at   | -1.8 | Prim1                  | DNA primase, p49 subunit                                                                                    |
| 1427923_at   | -1.8 | Cttn                   | cortactin                                                                                                   |
| 1437024_at   | -1.8 | Atp13a2                | ATPase type 13A2                                                                                            |
| 1437159_at   | -1.8 | Rapgef2                | Rap guanine nucleotide exchange factor (GEF) 2                                                              |
| 1456205_x_at | -1.8 | Iqwd1                  | IQ motif and WD repeats 1                                                                                   |
| 1415849_s_at | -1.8 | Papss1                 | 3'-phosphoadenosine 5'-phosphosulfate synthase 1                                                            |
| 1456128_at   | -1.8 | 1700012B15Rik          | RIKEN cDNA 1700012B15 gene                                                                                  |
| 1454960_at   | -1.8 | Mppe1                  | metallophosphoesterase 1                                                                                    |
| 1451516_at   | -1.8 | 9430008C03Rik          | RIKEN cDNA 9430008C03 gene                                                                                  |
|              |      | ENSMUSG00000074846 /// | predicted gene, ENSMUSG00000074846 /// polymerase (RNA) II (DNA directed) polypeptide L /// ubiquitin       |
| 1449145_a_at | -1.8 | Polr2l ///             | specific peptidase 50                                                                                       |
| 1456763_at   | -1.8 | Cblb                   | Casitas B-lineage lymphoma b                                                                                |
| 1452830_s_at | -1.8 | Cast                   | calpastatin                                                                                                 |
| 1455155_at   | -1.8 | LOC432971              | hypothetical gene supported by AK038224                                                                     |
| 1448103_s_at | -1.8 | Nfkbia                 | nuclear factor of kappa light polypeptide gene enhancer in B-cells inhibitor, alpha                         |
| 1433805_at   | -1.8 | Slc9a3r2               | solute carrier family 9 (sodium/hydrogen exchanger), member 3 regulator 2                                   |
| 1448242_at   | -1.8 | Ifi30                  | interferon gamma inducible protein 30                                                                       |

|              |      |                         |                                                                                                                                                                                        |
|--------------|------|-------------------------|----------------------------------------------------------------------------------------------------------------------------------------------------------------------------------------|
| 1453004_at   | -1.8 | Ddx58                   | DEAD (Asp-Glu-Ala-Asp) box polypeptide 58                                                                                                                                              |
| 1449372_at   | -1.8 | Xpo5                    | exportin 5                                                                                                                                                                             |
| 1434833_at   | -1.9 | Kpnb1                   | karyopherin (importin) beta 1                                                                                                                                                          |
| 1450628_at   | -1.9 | Fam101b                 | family with sequence similarity 101, member B                                                                                                                                          |
| 1415741_at   | -1.9 | Hp1bp3                  | heterochromatin protein 1, binding protein 3                                                                                                                                           |
| 1433455_at   | -1.9 | Ergic1                  | endoplasmic reticulum-golgi intermediate compartment (ERGIC) 1                                                                                                                         |
| 1434986_a_at | -1.9 | H47                     | histocompatibility 47                                                                                                                                                                  |
| 1416105_at   | -1.9 | Prdx4                   | peroxiredoxin 4                                                                                                                                                                        |
| 1439443_x_at | -1.9 | Akr1b3                  | aldo-keto reductase family 1, member B3 (aldose reductase)                                                                                                                             |
| 1433510_x_at | -1.9 | Dbi                     | diazepam binding inhibitor                                                                                                                                                             |
| 1438091_a_at | -1.9 | Nlgn2                   | neuroligin 2                                                                                                                                                                           |
| 1434487_at   | -1.9 | Nfkbia                  | nuclear factor of kappa light polypeptide gene enhancer in B-cells inhibitor, alpha                                                                                                    |
| 1424535_at   | -1.9 | Ets1                    | E26 avian leukemia oncogene 1, 5' domain                                                                                                                                               |
| 1437175_at   | -1.9 | Nars                    | asparaginyl-tRNA synthetase                                                                                                                                                            |
| 1426972_at   | -1.9 | AI467606                | expressed sequence AI467606                                                                                                                                                            |
| 1456695_x_at | -1.9 | Argef2                  | ADP-ribosylation factor guanine nucleotide-exchange factor 2 (brefeldin A-inhibited)                                                                                                   |
| 1434031_at   | -1.9 | Tatdn1                  | TatD DNase domain containing 1                                                                                                                                                         |
| 1424987_at   | -1.9 | Ccnt2                   | cyclin T2                                                                                                                                                                              |
| 1455818_at   | -1.9 | Uqcrl                   | ubiquinol-cytochrome c reductase hinge protein                                                                                                                                         |
| 1423677_at   | -1.9 | Hip1                    | huntingtin interacting protein 1                                                                                                                                                       |
| 1426342_at   | -1.9 | Smarcc2                 | SWI/SNF related, matrix associated, actin dependent regulator of chromatin, subfamily c, member 2                                                                                      |
| 1423929_at   | -1.9 | Pros1                   | protein S (alpha)                                                                                                                                                                      |
| 1436292_a_at | -1.9 | Rps25                   | ribosomal protein S25                                                                                                                                                                  |
| 1448474_at   | -1.9 | Noc3l                   | nucleolar complex associated 3 homolog (S. cerevisiae)                                                                                                                                 |
| 1418856_a_at | -1.9 | Zfr                     | zinc finger RNA binding protein                                                                                                                                                        |
| 1455964_at   | -1.9 | Creb3l2                 | cAMP responsive element binding protein 3-like 2                                                                                                                                       |
| 1424755_at   | -2.0 | Ythdc1                  | YTH domain containing 1                                                                                                                                                                |
| 1416721_s_at | -2.0 | Parp9                   | poly (ADP-ribose) polymerase family, member 9                                                                                                                                          |
| 1438159_x_at | -2.0 | Phf15                   | PHD finger protein 15                                                                                                                                                                  |
| 1451561_at   | -2.0 | Mtmr9                   | myotubularin related protein 9                                                                                                                                                         |
| 1433721_x_at | -2.0 | Hn1                     | hematological and neurological expressed sequence 1                                                                                                                                    |
| 1448770_a_at | -2.0 | Nt5dc3                  | 5'-nucleotidase domain containing 3                                                                                                                                                    |
| 1437389_x_at | -2.0 | Ly6e                    | lymphocyte antigen 6 complex, locus E                                                                                                                                                  |
| 1439394_x_at | -2.0 | Gsn                     | gelsolin                                                                                                                                                                               |
| 1419636_at   | -2.0 | Jak2                    | Janus kinase 2                                                                                                                                                                         |
| 1436499_at   | -2.0 | Ptpn11                  | protein tyrosine phosphatase, non-receptor type 11                                                                                                                                     |
| 1428944_at   | -2.0 | 4930523C11Rik /// Adam6 | RIKEN cDNA 4930523C11 gene /// a disintegrin and metallopeptidase domain 6                                                                                                             |
| 1436451_a_at | -2.0 | Lass5                   | LAG1 homolog, ceramide synthase 5                                                                                                                                                      |
| 1456308_x_at | -2.0 | Troap                   | trophinin associated protein                                                                                                                                                           |
| 1423141_at   | -2.0 | Nop14                   | NOP14 nucleolar protein homolog (yeast)                                                                                                                                                |
| 1435824_at   | -2.0 | Tg                      | thyroglobulin                                                                                                                                                                          |
| 1451015_at   | -2.0 | Dnajc3                  | DnaJ (Hsp40) homolog, subfamily C, member 3                                                                                                                                            |
| 1423847_at   | -2.0 | 1700021K02Rik           | RIKEN cDNA 1700021K02 gene                                                                                                                                                             |
| 1452147_at   | -2.0 | 1500001A10Rik           | RIKEN cDNA 1500001A10 gene                                                                                                                                                             |
| 1453120_at   | -2.0 | Smpd4                   | sphingomyelin phosphodiesterase 4                                                                                                                                                      |
| 1448526_at   | -2.0 | Rbm26                   | RNA binding motif protein 26                                                                                                                                                           |
| 1435157_at   | -2.0 | Cav1                    | caveolin 1, caveolae protein                                                                                                                                                           |
| 1449099_at   | -2.0 | Pxdn                    | peroxidase homolog (Drosophila)                                                                                                                                                        |
| 1436834_x_at | -2.0 | Ddx17                   | DEAD (Asp-Glu-Ala-Asp) box polypeptide 17                                                                                                                                              |
| 1433520_at   | -2.0 | Slc9a3r1                | solute carrier family 9 (sodium/hydrogen exchanger), member 3 regulator 1                                                                                                              |
| 1456018_at   | -2.0 | Cds2                    | CDP-diacylglycerol synthase (phosphatidate cytidyltransferase) 2                                                                                                                       |
| 1423828_at   | -2.0 | Anxa8                   | annexin A8                                                                                                                                                                             |
| 1436954_at   | -2.0 | B3gnt1                  | UDP-GlcNAc:betaGal beta-1,3-N-acetylglucosaminyltransferase 1                                                                                                                          |
| 1418152_at   | -2.0 | Smarcd3                 | SWI/SNF related, matrix associated, actin dependent regulator of chromatin, subfamily d, member 3                                                                                      |
| 1435178_x_at | -2.0 | Kcnk2                   | potassium channel, subfamily K, member 2                                                                                                                                               |
| 1451550_at   | -2.0 | Alkbh1                  | alkB, alkylation repair homolog 1 (E. coli)                                                                                                                                            |
| 1460634_at   | -2.0 | Tbk1                    | TANK-binding kinase 1                                                                                                                                                                  |
| 1438483_at   | -2.0 | Dtx4                    | deltex 4 homolog (Drosophila)                                                                                                                                                          |
| 1437014_x_at | -2.0 | Lman1                   | lectin, mannose-binding, 1                                                                                                                                                             |
| 1433854_at   | -2.0 | Tkt                     | transketolase                                                                                                                                                                          |
| 1452870_at   | -2.0 | Sulf1                   | sulfatase 1                                                                                                                                                                            |
| 1429429_s_at | -2.0 | Leprt                   | leptin receptor overlapping transcript                                                                                                                                                 |
| 1421375_a_at | -2.0 | Runx1                   | runt related transcription factor 1                                                                                                                                                    |
| 1436756_x_at | -2.1 | Dhcr24                  | 24-dehydrocholesterol reductase                                                                                                                                                        |
| 1416698_a_at | -2.1 | Rps6ka1                 | ribosomal protein S6 kinase polypeptide 1                                                                                                                                              |
| 1435612_at   | -2.1 | Slc48a1                 | solute carrier family 48 (heme transporter), member 1                                                                                                                                  |
| 1434897_a_at | -2.1 | D4Wsu114e               | DNA segment, Chr 4, Wayne State University 114, expressed                                                                                                                              |
| 1451068_s_at | -2.1 | AU020206                | expressed sequence AU020206                                                                                                                                                            |
| 1435074_at   | -2.1 | Stard10                 | START domain containing 10                                                                                                                                                             |
| 1450399_at   | -2.1 | Ankrd10                 | ankyrin repeat domain 10                                                                                                                                                               |
| 1433763_at   | -2.1 | Txndc17                 | thioredoxin domain containing 17                                                                                                                                                       |
| 1448691_at   | -2.1 | Cubn                    | cubilin (intrinsic factor-cobalamin receptor)                                                                                                                                          |
| 1452230_at   | -2.1 | Cdk6                    | cyclin-dependent kinase 6                                                                                                                                                              |
| 1437413_x_at | -2.1 | Rpl37                   | ribosomal protein L37                                                                                                                                                                  |
| 1435718_at   | -2.1 | Lima1                   | LIM domain and actin binding 1                                                                                                                                                         |
| 1438760_x_at | -2.1 | Hadh                    | hydroxyacyl-Coenzyme A dehydrogenase                                                                                                                                                   |
| 1417407_at   | -2.1 | LOC636537 /// Ssr1      | similar to signal sequence receptor, alpha /// signal sequence receptor, alpha region containing RIKEN cDNA 2310056B04 gene; pre B-cell leukemia transcription factor 1 /// pre B-cell |
| 1449623_at   | -2.1 | LOC676870 /// Pbx1      | leukemia transcription factor 1                                                                                                                                                        |
| 1428661_at   | -2.1 | Parp1                   | poly (ADP-ribose) polymerase family, member 1                                                                                                                                          |
| 1454917_at   | -2.1 | Txndc10                 | thioredoxin domain containing 10                                                                                                                                                       |
| 1448149_at   | -2.1 | Dnajc21                 | DnaJ (Hsp40) homolog, subfamily C, member 21                                                                                                                                           |
| 1416195_at   | -2.1 | Tk1                     | thymidine kinase 1                                                                                                                                                                     |
| 1419869_s_at | -2.1 | Jub                     | ajuba                                                                                                                                                                                  |

|              |      |                                       |                                                                                                                               |
|--------------|------|---------------------------------------|-------------------------------------------------------------------------------------------------------------------------------|
|              |      | OTTMUSG00000000724 ///                | predicted gene, OTTMUSG00000000724 /// serine (or cysteine) peptidase inhibitor, clade B, member 9e ///                       |
| 1418101_a_at | -2.1 | Serpinb9e /// Serpinb9f /// Serpinb9g | serine (or cysteine) peptidase inhibitor, clade B, member 9f /// serine (or cysteine) peptidase inhibitor, clade B, member 9g |
| 1448486_at   | -2.1 | Mgat2                                 | mannoside acetylglucosaminyltransferase 2                                                                                     |
| 1434063_at   | -2.1 | Hspa9                                 | heat shock protein 9                                                                                                          |
| 1418394_a_at | -2.1 | Eno2                                  | enolase 2, gamma neuronal                                                                                                     |
| 1448353_x_at | -2.1 | Lims2                                 | LIM and senescent cell antigen like domains 2                                                                                 |
| 1428935_at   | -2.1 | Siglecg                               | sialic acid binding Ig-like lectin G                                                                                          |
| 1452327_at   | -2.2 | Epha2                                 | EF-hand domain family, member A2                                                                                              |
| 1434091_at   | -2.2 | Slc25a25                              | solute carrier family 25 (mitochondrial carrier, phosphate carrier), member 25                                                |
| 1416969_at   | -2.2 | Emp3                                  | epithelial membrane protein 3                                                                                                 |
| 1428587_at   | -2.2 | Anapc5                                | anaphase-promoting complex subunit 5                                                                                          |
| 1436883_at   | -2.2 | Ets1                                  | E26 avian leukemia oncogene 1, 5' domain                                                                                      |
| 1435281_at   | -2.2 | LOC100043000 /// Rpl3                 | similar to ribosomal protein L3 /// ribosomal protein L3                                                                      |
| 1437807_x_at | -2.2 | 1110013L07Rik                         | RIKEN cDNA 1110013L07 gene                                                                                                    |
| 1450641_at   | -2.2 | Hhip1                                 | hedgehog interacting protein-like 1                                                                                           |
| 1426387_x_at | -2.2 | Actn1                                 | actinin, alpha 1                                                                                                              |
| 1437885_at   | -2.2 | 2610101N10Rik                         | RIKEN cDNA 2610101N10 gene                                                                                                    |
| 1417376_a_at | -2.2 | Sspn                                  | sarcospan                                                                                                                     |
| 1423126_at   | -2.2 | Shisa5                                | shisa homolog 5 (Xenopus laevis)                                                                                              |
| 1427234_at   | -2.2 | Pat1                                  | protein associated with topoisomerase II homolog 1 (yeast)                                                                    |
| 1416470_a_at | -2.2 | Akt1 /// LOC100047666                 | thymoma viral proto-oncogene 1 /// similar to serine/threonine protein kinase                                                 |
| 1429151_at   | -2.2 | Prdx1                                 | peroxiredoxin 1                                                                                                               |
| 1416372_at   | -2.2 | Pfkfb3                                | 6-phosphofructo-2-kinase/fructose-2,6-biphosphatase 3                                                                         |
| 1452671_s_at | -2.2 | D5Wsu178e                             | DNA segment, Chr 5, Wayne State University 178, expressed                                                                     |
| 1452887_at   | -2.2 | Fam171b                               | family with sequence similarity 171, member B                                                                                 |
| 1451437_at   | -2.2 | Wdfy2                                 | WD repeat and FYVE domain containing 2                                                                                        |
|              |      |                                       | potassium voltage gated channel, Shab-related subfamily, member 1 /// protein kinase C and casein kinase                      |
| 1417420_at   | -2.2 | Kcnb1 /// Pacsin2                     | substrate in neurons 2                                                                                                        |
| 1437716_x_at | -2.2 | Myo10                                 | myosin X                                                                                                                      |
| 1455090_at   | -2.2 | Ank2                                  | ankyrin 2, brain                                                                                                              |
| 1421594_a_at | -2.2 | Ide                                   | insulin degrading enzyme                                                                                                      |
| 1451049_at   | -2.2 | Dync1li2                              | dynein, cytoplasmic 1 light intermediate chain 2                                                                              |
| 1428884_at   | -2.2 | Prkab2                                | protein kinase, AMP-activated, beta 2 non-catalytic subunit                                                                   |
| 1426244_at   | -2.2 | Glt8d1                                | glycosyltransferase 8 domain containing 1                                                                                     |
| 1420977_at   | -2.2 | Ephx1                                 | epoxide hydrolase 1, microsomal                                                                                               |
| 1426680_at   | -2.2 | 1200009F10Rik                         | RIKEN cDNA 1200009F10 gene                                                                                                    |
| 1455178_at   | -2.2 | Pcyox1                                | prenylcysteine oxidase 1                                                                                                      |
| 1455959_s_at | -2.2 | Qser1                                 | glutamine and serine rich 1                                                                                                   |
| 1433862_at   | -2.2 | Rif                                   | rearranged L-myc fusion sequence                                                                                              |
| 1437908_a_at | -2.2 | Mdh1                                  | malate dehydrogenase 1, NAD (soluble)                                                                                         |
| 1423229_at   | -2.2 | Cd151                                 | CD151 antigen                                                                                                                 |
| 1442347_at   | -2.2 | 0610007P08Rik                         | RIKEN cDNA 0610007P08 gene                                                                                                    |
| 1454650_at   | -2.2 | Cxcl3                                 | chemokine (C-X-C motif) ligand 3                                                                                              |
| 1454677_at   | -2.2 | Osbpl3                                | oxysterol binding protein-like 3                                                                                              |
| 1433429_at   | -2.2 | Ddx17                                 | DEAD (Asp-Glu-Ala-Asp) box polypeptide 17                                                                                     |
| 1456728_x_at | -2.2 | Cdc2l6                                | cell division cycle 2-like 6 (CDK8-like)                                                                                      |
| 1452155_a_at | -2.2 | Zfp362                                | zinc finger protein 362                                                                                                       |
| 1423680_at   | -2.2 | D930016D06Rik                         | RIKEN cDNA D930016D06 gene                                                                                                    |
| 1455019_x_at | -2.2 | AW493563                              | expressed sequence AW493563                                                                                                   |
| 1423508_at   | -2.2 | Lpcat1                                | lysophosphatidylcholine acyltransferase 1                                                                                     |
| 1433985_at   | -2.3 | Rbm26                                 | RNA binding motif protein 26                                                                                                  |
| 1434026_at   | -2.3 | Glt8d4 /// LOC100048436               | glycosyltransferase 8 domain containing 4 /// similar to CDNA sequence BC049816                                               |
| 1424291_at   | -2.3 | Ano1                                  | anoctamin 1, calcium activated chloride channel                                                                               |
| 1418634_at   | -2.3 | Il23a                                 | interleukin 23, alpha subunit p19                                                                                             |
| 1439377_x_at | -2.3 | Tmem171                               | transmembrane protein 171                                                                                                     |
| 1447602_x_at | -2.3 | Srf                                   | serum response factor                                                                                                         |
| 1416119_at   | -2.3 | Pnrc2                                 | proline-rich nuclear receptor coactivator 2                                                                                   |
| 1427229_at   | -2.3 | Emp2                                  | epithelial membrane protein 2                                                                                                 |
| 1450069_a_at | -2.3 | 6820431F20Rik                         | RIKEN cDNA 6820431F20 gene                                                                                                    |
| 1420375_at   | -2.3 | Tank                                  | TRAF family member-associated Nf-kappa B activator                                                                            |
| 1423448_at   | -2.3 | Traf7                                 | Tnf receptor-associated factor 7                                                                                              |
| 1416961_at   | -2.3 | Sec61b                                | Sec61 beta subunit                                                                                                            |
| 1450686_at   | -2.3 | Taf1d                                 | TATA box binding protein (Tbp)-associated factor, RNA polymerase I, D                                                         |
| 1441866_s_at | -2.3 | Tars                                  | threonyl-tRNA synthetase                                                                                                      |
| 1426884_at   | -2.3 | Parva                                 | parvin, alpha                                                                                                                 |
|              |      | OTTMUSG00000016246 ///                | predicted gene, OTTMUSG00000016246 /// ribosomal protein S29                                                                  |
| 1431179_at   | -2.3 | Rps29                                 | ribosomal protein S29                                                                                                         |
| 1460243_at   | -2.3 | Dido1                                 | death inducer-obliterator 1                                                                                                   |
| 1449405_at   | -2.3 | Nin                                   | ninein                                                                                                                        |
| 1433779_at   | -2.3 | LOC100046650 /// Prelid1              | similar to PRELI domain containing 1 /// PRELI domain containing 1                                                            |
| 1416723_at   | -2.3 | Eif4h                                 | eukaryotic translation initiation factor 4H                                                                                   |
| 1448253_at   | -2.3 | Chek2                                 | CHK2 checkpoint homolog (S. pombe)                                                                                            |
| 1423902_s_at | -2.3 | Asph                                  | aspartate-beta-hydroxylase                                                                                                    |
| 1433875_at   | -2.3 | P2rx7                                 | purinergic receptor P2X, ligand-gated ion channel, 7                                                                          |
| 1418506_a_at | -2.3 | Nr1h4                                 | nuclear receptor subfamily 1, group H, member 4                                                                               |
| 1434373_at   | -2.3 | Sec61a1                               | Sec61 alpha 1 subunit (S. cerevisiae)                                                                                         |
| 1436618_at   | -2.3 | Ephb3                                 | Eph receptor B3                                                                                                               |
| 1429019_s_at | -2.3 | Hspb6                                 | heat shock protein, alpha-crystallin-related, B6                                                                              |
| 1439184_s_at | -2.3 | Apex1                                 | apurinic/apyrimidinic endonuclease 1                                                                                          |
| 1415751_at   | -2.3 | Atox1                                 | ATX1 (antioxidant protein 1) homolog 1 (yeast)                                                                                |
| 1426373_at   | -2.3 | Zfp579                                | zinc finger protein 579                                                                                                       |
| 1437724_x_at | -2.3 | LOC100047199 /// Odf2                 | similar to outer dense fiber of sperm tails 2 /// outer dense fiber of sperm tails 2                                          |
| 1448599_s_at | -2.3 | Gpr125                                | G protein-coupled receptor 125                                                                                                |
| 1428229_at   | -2.3 | Cbx6 /// Npcc /// Nptxr               | chromobox homolog 6 /// neuronal pentraxin with chromo domain /// neuronal pentraxin receptor                                 |
| 1435925_at   | -2.3 | Hlf                                   | helicase-like transcription factor                                                                                            |

|              |      |                     |                                                                                                  |
|--------------|------|---------------------|--------------------------------------------------------------------------------------------------|
| 1451218_at   | -2.4 | Map4k4              | mitogen-activated protein kinase kinase 4                                                        |
| 1437773_x_at | -2.4 | Phldb2              | pleckstrin homology-like domain, family B, member 2                                              |
| 1423104_at   | -2.4 | Ubac2               | ubiquitin associated domain containing 2                                                         |
| 1453312_at   | -2.4 | Prkca               | protein kinase C, alpha                                                                          |
| 1430388_a_at | -2.4 | Fzd1                | frizzled homolog 1 (Drosophila)                                                                  |
| 1435087_at   | -2.4 | Cxxc5               | CXXC finger 5                                                                                    |
| 1452664_a_at | -2.4 | Ehd2                | EH-domain containing 2                                                                           |
| 1434010_at   | -2.4 | Bcl10               | B-cell leukemia/lymphoma 10                                                                      |
| 1452153_at   | -2.4 | Tmem106b            | transmembrane protein 106B                                                                       |
| 1450054_at   | -2.4 | Mfhas1              | malignant fibrous histiocytoma amplified sequence 1                                              |
| 1460694_s_at | -2.4 | Asxl2               | additional sex combs like 2 (Drosophila)                                                         |
| 1451210_at   | -2.4 | LOC546078 /// Samd1 | similar to sterile alpha motif domain containing 1 /// sterile alpha motif domain containing 1   |
| 1420809_a_at | -2.4 | Itga3               | integrin alpha 3                                                                                 |
| 1448634_at   | -2.4 | Rmnd5a              | required for meiotic nuclear division 5 homolog A (S. cerevisiae)                                |
| 1460543_x_at | -2.4 | Lmna                | lamin A                                                                                          |
| 1450380_at   | -2.4 | 4930534B04Rik       | RIKEN cDNA 4930534B04 gene                                                                       |
| 1455345_at   | -2.4 | Nek7                | NIMA (never in mitosis gene a)-related expressed kinase 7                                        |
| 1417763_at   | -2.4 | Nsbp1               | nucleosome binding protein 1                                                                     |
| 1434731_x_at | -2.4 | Ggt1                | gamma-glutamyltransferase 1                                                                      |
| 1428270_at   | -2.4 | BC055324            | cDNA sequence BC055324                                                                           |
| 1437133_x_at | -2.4 | Hnrnpa3             | heterogeneous nuclear ribonucleoprotein A3                                                       |
| 1421824_at   | -2.4 | Tob1                | transducer of ErbB-2.1                                                                           |
| 1451209_at   | -2.4 | Fut11               | fucosyltransferase 11                                                                            |
| 1429291_at   | -2.4 | Kctd3               | potassium channel tetramerisation domain containing 3                                            |
| 1455777_x_at | -2.4 | Cast                | calpastatin                                                                                      |
| 1439185_x_at | -2.4 | Eif3c               | eukaryotic translation initiation factor 3, subunit C                                            |
| 1456378_s_at | -2.4 | Sec1411             | SEC14-like 1 (S. cerevisiae)                                                                     |
| 1455538_at   | -2.4 | Sesn3               | Sestrin 3, mRNA (cDNA clone IMAGE:3481673)                                                       |
| 1424707_at   | -2.4 | Ipo8                | importin 8                                                                                       |
| 1424460_s_at | -2.4 | Sreb1               | sterol regulatory element binding transcription factor 1                                         |
| 1434116_at   | -2.4 | Timm8a2             | translocase of inner mitochondrial membrane 8 homolog a2 (yeast)                                 |
| 1433670_at   | -2.4 | Lasp1               | LIM and SH3 protein 1                                                                            |
| 1451091_at   | -2.4 | Als2cr13            | amyotrophic lateral sclerosis 2 (juvenile) chromosome region, candidate 13 (human)               |
| 1423151_at   | -2.4 | Ppil4               | peptidylprolyl isomerase (cyclophilin)-like 4                                                    |
| 1432263_a_at | -2.4 | Galnt12             | UDP-N-acetyl-alpha-D-galactosamine:polypeptide N-acetylgalactosaminyltransferase 12              |
| 1424515_at   | -2.4 | Iars                | isoleucine-tRNA synthetase                                                                       |
| 1448449_at   | -2.4 | Mylk                | myosin, light polypeptide kinase                                                                 |
| 1436691_x_at | -2.4 | Rab4b               | RAB4B, member RAS oncogene family                                                                |
| 1436801_x_at | -2.4 | Spnb2               | spectrin beta 2                                                                                  |
| 1456590_x_at | -2.4 | Rnf157              | ring finger protein 157                                                                          |
| 1433717_at   | -2.4 | Mat2a               | methionine adenosyltransferase II, alpha                                                         |
| 1416517_at   | -2.4 | Gtpbp2              | GTP binding protein 2                                                                            |
| 1439259_x_at | -2.5 | Nfia                | nuclear factor I/A                                                                               |
| 1449198_a_at | -2.5 | Tm9sf3              | transmembrane 9 superfamily member 3                                                             |
| 1455164_at   | -2.5 | P4ha3               | procollagen-proline, 2-oxoglutarate 4-dioxygenase (proline 4-hydroxylase), alpha polypeptide III |
| 1428217_at   | -2.5 | Cbx2                | chromobox homolog 2 (Drosophila Pc class)                                                        |
| 1448368_at   | -2.5 | Ccdc137             | coiled-coil domain containing 137                                                                |
| 1420959_at   | -2.5 | Idh1                | isocitrate dehydrogenase 1 (NADP+), soluble                                                      |
| 1422782_s_at | -2.5 | Eif1                | eukaryotic translation initiation factor 1                                                       |
| 1436332_at   | -2.5 | Asns                | asparagine synthetase                                                                            |
| 1454753_at   | -2.5 | Dot1l               | DOT1-like, histone H3 methyltransferase (S. cerevisiae)                                          |
| 1447363_s_at | -2.5 | Fbx14               | F-box and leucine-rich repeat protein 14                                                         |
| 1423678_at   | -2.5 | Slc25a28            | solute carrier family 25, member 28                                                              |
| 1416503_at   | -2.5 | Ebp                 | phenylalkylamine Ca2+ antagonist (emopamil) binding protein                                      |
| 1446618_at   | -2.5 | Tubb5               | tubulin, beta 5                                                                                  |
| 1436907_at   | -2.5 | 6330406115Rik       | RIKEN cDNA 6330406115 gene                                                                       |
| 1416009_at   | -2.5 | Flii                | flightless 1 homolog (Drosophila)                                                                |
| 1455350_at   | -2.5 | Mut                 | methylmalonyl-Coenzyme A mutase                                                                  |
| 1450018_s_at | -2.5 | A130040M12Rik       | RIKEN cDNA A130040M12 gene                                                                       |
| 1428875_at   | -2.5 | Nde1                | nuclear distribution gene E homolog 1 (A nidulans)                                               |
| 1418127_a_at | -2.5 | Ncf4                | neutrophil cytosolic factor 4                                                                    |
| 1455750_at   | -2.5 | Anp32e              | acidic (leucine-rich) nuclear phosphoprotein 32 family, member E                                 |
| 1450044_at   | -2.5 | Gnaq                | guanine nucleotide binding protein, alpha q polypeptide                                          |
| 1428796_at   | -2.5 | Gnai2               | guanine nucleotide binding protein (G protein), alpha inhibiting 2                               |
| 1419259_at   | -2.5 | Hspa8               | heat shock protein 8                                                                             |
| 1436319_at   | -2.5 | Txnec5              | thioredoxin domain containing 5                                                                  |
| 1460303_at   | -2.5 | 4932425I24Rik       | RIKEN cDNA 4932425I24 gene                                                                       |
| 1435345_at   | -2.5 | Fkbp10              | FK506 binding protein 10                                                                         |
| 1435737_a_at | -2.5 | Pon2                | paraoxonase 2                                                                                    |
| 1460170_at   | -2.5 | 2700023E23Rik       | RIKEN cDNA 2700023E23 gene                                                                       |
| 1455022_at   | -2.5 | Gtsf1               | Gametocyte specific factor 1 (Gtsf1), mRNA                                                       |
| 1418084_at   | -2.5 | Serpnb9g            | serine (or cysteine) peptidase inhibitor, clade B, member 9g                                     |
| 1421861_at   | -2.5 | Rhox5               | reproductive homeobox 5                                                                          |
| 1426350_at   | -2.5 | Rgmb                | RGM domain family, member B                                                                      |
| 1428239_at   | -2.6 | Fez2                | fasciculation and elongation protein zeta 2 (zygin II)                                           |
| 1448361_at   | -2.6 | B230354K17Rik       | RIKEN cDNA B230354K17 gene                                                                       |
| 1460203_at   | -2.6 | Nhlrc3              | NHL repeat containing 3                                                                          |
| 1434860_at   | -2.6 | Tbcb                | tubulin folding cofactor B                                                                       |
| 1435456_at   | -2.6 | Add1                | adducin 1 (alpha)                                                                                |
| 1428103_at   | -2.6 | Slc2a6              | solute carrier family 2 (facilitated glucose transporter), member 6                              |
| 1433559_at   | -2.6 | Nfkbia              | nuclear factor of kappa light polypeptide gene enhancer in B-cells inhibitor, alpha              |
| 1426571_at   | -2.6 | Tmem57              | transmembrane protein 57                                                                         |
| 1455564_at   | -2.6 | Nfkbia              | nuclear factor of kappa light polypeptide gene enhancer in B-cells inhibitor, alpha              |
| 1441097_at   | -2.6 | Itpr1               | inositol 1,4,5-triphosphate receptor 1                                                           |
| 1440279_at   | -2.6 | Dzip3               | DAZ interacting protein 3, zinc finger                                                           |
| 1436364_x_at | -2.6 | Maf1                | MAF1 homolog (S. cerevisiae)                                                                     |

|              |      |                         |                                                                                                                              |
|--------------|------|-------------------------|------------------------------------------------------------------------------------------------------------------------------|
| 1436395_at   | -2.6 | Kif22                   | kinesin family member 22                                                                                                     |
| 1433645_at   | -2.6 | Ptpn2                   | protein tyrosine phosphatase, non-receptor type 2                                                                            |
| 1415840_at   | -2.6 | Ghitm                   | growth hormone inducible transmembrane protein                                                                               |
| 1437290_at   | -2.6 | Txndc13                 | thioredoxin domain containing 13                                                                                             |
| 1417028_a_at | -2.6 | Entpd5                  | ectonucleoside triphosphate diphosphohydrolase 5                                                                             |
| 1449839_at   | -2.6 | Bbx                     | bobby sox homolog (Drosophila)                                                                                               |
| 1436346_at   | -2.6 | Cmtm6                   | CKLF-like MARVEL transmembrane domain containing 6                                                                           |
| 1428478_at   | -2.6 | Sec61a1                 | Sec61 alpha 1 subunit (S. cerevisiae)                                                                                        |
| 1415949_at   | -2.6 | Casp6                   | caspase 6                                                                                                                    |
| 1450852_s_at | -2.6 | Ptar1                   | protein prenyltransferase alpha subunit repeat containing 1                                                                  |
| 1437284_at   | -2.6 | Sema6d                  | sema domain, transmembrane domain (TM), and cytoplasmic domain, (semaphorin) 6D                                              |
| 1429065_at   | -2.6 | ENSMUSG00000074460 ///  | predicted gene, ENSMUSG00000074460 ///                                                                                       |
| 1416412_at   | -2.6 | Tmed2                   | predicted gene, ENSMUSG00000074460 /// transmembrane emp24 domain trafficking protein 2                                      |
| 1434767_at   | -2.7 | Lxn                     | latexin                                                                                                                      |
| 1422476_at   | -2.7 | Ing1                    | inhibitor of growth family, member 1                                                                                         |
| 1424906_at   | -2.7 | Aars                    | alanyl-tRNA synthetase                                                                                                       |
| 1449632_s_at | -2.7 | Smo                     | smoothened homolog (Drosophila)                                                                                              |
| 1460559_at   | -2.7 | Zc3h6                   | zinc finger CCCH type containing 6                                                                                           |
| 1418483_a_at | -2.7 | Hivep3                  | human immunodeficiency virus type I enhancer binding protein 3                                                               |
| 1460674_at   | -2.7 | Gltp                    | glycolipid transfer protein                                                                                                  |
| 1418192_at   | -2.7 | Wrb                     | tryptophan rich basic protein                                                                                                |
| 1426905_a_at | -2.7 | Prdx2                   | peroxiredoxin 2                                                                                                              |
| 1429189_at   | -2.7 | Gcsh                    | glycine cleavage system protein H (aminomethyl carrier)                                                                      |
| 1424894_at   | -2.7 | Fam100b                 | family with sequence similarity 100, member B                                                                                |
| 1433586_at   | -2.7 | Sec24d                  | Sec24 related gene family, member D (S. cerevisiae)                                                                          |
| 1455049_at   | -2.7 | Sulf1                   | sulfatase 1                                                                                                                  |
| 1439925_at   | -2.7 | Nt5dc3                  | 5'-nucleotidase domain containing 3                                                                                          |
| 1450048_a_at | -2.7 | Opcml                   | opioid binding protein/cell adhesion molecule-like                                                                           |
| 1437308_s_at | -2.7 | Atad2b                  | ATPase family, AAA domain containing 2B                                                                                      |
| 1418626_a_at | -2.7 | Plscr1                  | phospholipid scramblase 1                                                                                                    |
| 1455728_at   | -2.7 | Aox1                    | aldehyde oxidase 1                                                                                                           |
| 1434311_at   | -2.7 | Nisch                   | nischarin                                                                                                                    |
| 1417104_at   | -2.7 | Dpp3                    | dipeptidylpeptidase 3                                                                                                        |
| 1455419_at   | -2.7 | F3                      | coagulation factor III                                                                                                       |
| 1419027_s_at | -2.7 | Man2a1                  | mannosidase 2, alpha 1                                                                                                       |
| 1427177_at   | -2.7 | LOC100044161 /// Sema3a | hypothetical protein LOC100044161 /// sema domain, immunoglobulin domain (Ig), short basic domain, secreted, (semaphorin) 3A |
| 1436316_at   | -2.7 | Gnl3                    | guanine nucleotide binding protein-like 3 (nucleolar)                                                                        |
| 1417323_at   | -2.7 | Aars                    | alanyl-tRNA synthetase                                                                                                       |
| 1429896_at   | -2.7 | Ier5                    | immediate early response 5                                                                                                   |
| 1417842_at   | -2.7 | Akr1b3                  | aldo-keto reductase family 1, member B3 (aldose reductase)                                                                   |
| 1424092_at   | -2.8 | Malat1                  | metastasis associated lung adenocarcinoma transcript 1 (non-coding RNA)                                                      |
| 1423609_a_at | -2.8 | Tmem43                  | transmembrane protein 43                                                                                                     |
| 1439368_a_at | -2.8 | Tctn3                   | tectonic family member 3                                                                                                     |
| 1454735_at   | -2.8 | Tbca                    | tubulin cofactor a                                                                                                           |
| 1420836_at   | -2.8 | Wipi1                   | WD repeat domain, phosphoinositide interacting 1                                                                             |
| 1433954_at   | -2.8 | Hivep2                  | human immunodeficiency virus type I enhancer binding protein 2                                                               |
| 1429240_at   | -2.8 | Rassf1                  | Ras association (RalGDS/AF-6) domain family member 1                                                                         |
| 1437649_x_at | -2.8 | Pard3                   | par-3 (partitioning defective 3) homolog (C. elegans)                                                                        |
| 1448370_at   | -2.8 | Insig1                  | insulin induced gene 1                                                                                                       |
| 1448241_at   | -2.8 | Tmed10                  | transmembrane emp24-like trafficking protein 10 (yeast)                                                                      |
| 1424459_at   | -2.8 | Itga6                   | integrin alpha 6                                                                                                             |
| 1416499_a_at | -2.8 | Seprn1                  | selenoprotein N, 1                                                                                                           |
| 1428535_at   | -2.8 | Cdc20                   | cell division cycle 20 homolog (S. cerevisiae)                                                                               |
| 1452656_at   | -2.8 | Ogofd1                  | 2-oxoglutarate and iron-dependent oxygenase domain containing 1                                                              |
| 1416041_at   | -2.8 | Tbc1d16                 | TBC1 domain family, member 16                                                                                                |
| 1437471_at   | -2.8 | Mtap4                   | microtubule-associated protein 4                                                                                             |
| 1424776_a_at | -2.8 | Rsrc2                   | arginine/serine-rich coiled-coil 2                                                                                           |
| 1456039_at   | -2.8 | Etl4                    | enhancer trap locus 4                                                                                                        |
| 1437289_at   | -2.8 | Gtsf1                   | gametocyte specific factor 1                                                                                                 |
| 1451446_at   | -2.8 | Slc16a13                | solute carrier family 16 (monocarboxylic acid transporters), member 13                                                       |
| 1434676_at   | -2.8 | Odz4                    | odd Oz/ten-m homolog 4 (Drosophila)                                                                                          |
| 1447896_s_at | -2.8 | Irf1                    | interferon regulatory factor 1                                                                                               |
| 1450431_a_at | -2.8 | Rsu1                    | Ras suppressor protein 1                                                                                                     |
| 1418269_at   | -2.8 | Cldnd1                  | claudin domain containing 1                                                                                                  |
| 1437670_x_at | -2.8 | Abhd2                   | abhydrolase domain containing 2                                                                                              |
| 1434478_at   | -2.9 | Timp2                   | tissue inhibitor of metalloproteinase 2                                                                                      |
| 1432164_a_at | -2.9 | Arc3                    | actin related protein 2/3 complex, subunit 3                                                                                 |
| 1434485_a_at | -2.9 | Ppp2r2a                 | protein phosphatase 2 (formerly 2A), regulatory subunit B (PR 52), alpha isoform                                             |
| 1418238_at   | -2.9 | Uqcrc                   | ubiquinol-cytochrome c reductase (6.4kD) subunit                                                                             |
| 1460211_a_at | -2.9 | S3-12                   | plasma membrane associated protein, S3-12                                                                                    |
|              |      | Fbxl20                  | F-box and leucine-rich repeat protein 20                                                                                     |
|              |      | 100043718 ///           |                                                                                                                              |
|              |      | LOC100048508 ///        |                                                                                                                              |
| 1427049_s_at | -2.9 | OTTMUSG00000012957 ///  | predicted gene, 100043718 /// similar to Rpl36 protein /// predicted gene, OTTMUSG00000012957 /// ribosomal protein L36      |
| 1448410_at   | -2.9 | Rpl36                   | PQ loop repeat containing                                                                                                    |
| 1455249_at   | -2.9 | Pqlc3                   | RIKEN cDNA 1700094D03 gene                                                                                                   |
|              |      | 1700094D03Rik           | CCR4 carbon catabolite repression 4-like (S. cerevisiae) /// similar to carbon catabolite repression 4 protein homolog       |
| 1423846_x_at | -2.9 | Ccrn4l /// LOC100047134 | homolog                                                                                                                      |
| 1435763_at   | -2.9 | Rgl2                    | ral guanine nucleotide dissociation stimulator-like 2                                                                        |
| 1429764_at   | -2.9 | Tmem109                 | transmembrane protein 109                                                                                                    |
| 1428412_at   | -2.9 | Prdx1                   | peroxiredoxin 1                                                                                                              |
| 1416664_at   | -2.9 | Ing1                    | inhibitor of growth family, member 1                                                                                         |
| 1448549_a_at | -2.9 | Flnb                    | filamin, beta                                                                                                                |
| 1450688_at   | -2.9 | 4931431B13Rik           | RIKEN cDNA 4931431B13 gene                                                                                                   |

|              |      |                               |                                                                                                                |
|--------------|------|-------------------------------|----------------------------------------------------------------------------------------------------------------|
| 1438390_s_at | -2.9 | Tspan17                       | tetraspanin 17                                                                                                 |
| 1416897_at   | -2.9 | Trim2                         | tripartite motif-containing 2                                                                                  |
| 1423986_a_at | -2.9 | Stt3b                         | STT3, subunit of the oligosaccharyltransferase complex, homolog B (S. cerevisiae)                              |
| 1423176_at   | -2.9 | Epb4.1                        | erythrocyte protein band 4.1                                                                                   |
| 1456079_x_at | -2.9 | Slc22a23                      | solute carrier family 22, member 23                                                                            |
| 1417853_at   | -3.0 | Foxf2                         | forkhead box F2                                                                                                |
| 1415869_a_at | -3.0 | Zfand2a                       | zinc finger, AN1-type domain 2A                                                                                |
| 1446951_at   | -3.0 | Dctn6                         | dynactin 6                                                                                                     |
| 1416364_at   | -3.0 | Gabarapl1                     | gamma-aminobutyric acid (GABA(A)) receptor-associated protein-like 1                                           |
| 1452095_a_at | -3.0 | Zfp422-rs1                    | zinc finger protein 422, related sequence 1                                                                    |
| 1437211_x_at | -3.0 | Fgp                           | phosphoglycolate phosphatase                                                                                   |
| 1426754_x_at | -3.0 | Rif1                          | Rap1 interacting factor 1 homolog (yeast)                                                                      |
| 1451066_at   | -3.0 | Dync1li2                      | dynein, cytoplasmic 1 light intermediate chain 2                                                               |
| 1439060_s_at | -3.0 | Snx14                         | sorting nexin 14                                                                                               |
| 1424093_x_at | -3.0 | AW549877                      | expressed sequence AW549877                                                                                    |
| 1423120_at   | -3.0 | Lpcat3                        | lysophosphatidylcholine acyltransferase 3                                                                      |
| 1460238_at   | -3.0 | 2310002J21Rik                 | RIKEN cDNA 2310002J21 gene                                                                                     |
| 1426760_at   | -3.0 | Plscr1                        | phospholipid scramblase 1                                                                                      |
| 1455322_at   | -3.0 | Mrpl33                        | mitochondrial ribosomal protein L33                                                                            |
| 1456087_at   | -3.0 | 100043468                     | predicted gene, 100043468                                                                                      |
| 1417018_at   | -3.0 | Crip2                         | cysteine rich protein 2                                                                                        |
| 1451895_a_at | -3.0 | Map4k2                        | mitogen-activated protein kinase kinase kinase kinase 2                                                        |
| 1422906_at   | -3.0 | Ncapd2                        | non-SMC condensin I complex, subunit D2                                                                        |
| 1421662_a_at | -3.0 | Dnajb11                       | DnaJ (Hsp40) homolog, subfamily B, member 11                                                                   |
| 1416000_a_at | -3.0 | Sgk1                          | serum/glucocorticoid regulated kinase 1                                                                        |
| 1421546_a_at | -3.0 | Ncbp2                         | nuclear cap binding protein subunit 2                                                                          |
| 1423030_at   | -3.0 | Pvr                           | poliovirus receptor                                                                                            |
| 1438976_x_at | -3.0 | Cct6a                         | chaperonin containing Tcp1, subunit 6a (zeta)                                                                  |
| 1416589_at   | -3.1 | Mosc2                         | MOCO sulphurase C-terminal domain containing 2                                                                 |
| 1452832_s_at | -3.1 | Bicc1                         | bicaudal C homolog 1 (Drosophila)                                                                              |
| 1428078_at   | -3.1 | Abi2                          | abl-interactor 2                                                                                               |
| 1453056_at   | -3.1 | Matr3                         | matrin 3                                                                                                       |
| 1417143_at   | -3.1 | Tacc3                         | transforming, acidic coiled-coil containing protein 3                                                          |
| 1448592_at   | -3.1 | Dag1                          | dystroglycan 1                                                                                                 |
| 1428431_at   | -3.1 | Rbm9                          | RNA binding motif protein 9                                                                                    |
| 1451668_at   | -3.1 | C79407                        | expressed sequence C79407                                                                                      |
| 1435524_at   | -3.1 | Stab1                         | stabilin 1                                                                                                     |
| 1416766_at   | -3.1 | Msh2                          | mutS homolog 2 (E. coli)                                                                                       |
| 1455915_at   | -3.1 | Dna2                          | DNA replication helicase 2 homolog (yeast)                                                                     |
| 1455731_at   | -3.1 | Suox                          | sulfite oxidase                                                                                                |
| 1453572_a_at | -3.1 | Ppargc1a                      | peroxisome proliferative activated receptor, gamma, coactivator 1 alpha                                        |
| 1423667_at   | -3.1 | Zfp71-rs1                     | zinc finger protein 71, related sequence                                                                       |
| 1454740_at   | -3.1 | Marveld1                      | MARVEL (membrane-associating) domain containing 1                                                              |
| 1416091_at   | -3.1 | Apex1                         | apurinic/aprimidinic endonuclease 1                                                                            |
| 1427387_a_at | -3.1 | Entpd5                        | ectonucleoside triphosphate diphosphohydrolase 5                                                               |
| 1453412_a_at | -3.1 | BC049807                      | cDNA sequence BC049807                                                                                         |
| 1435323_a_at | -3.1 | Dnajc3                        | DnaJ (Hsp40) homolog, subfamily C, member 3                                                                    |
| 1426246_at   | -3.1 | Cnpy4                         | canopy 4 homolog (zebrafish)                                                                                   |
| 1456085_x_at | -3.1 | Otud1                         | OTU domain containing 1                                                                                        |
| 1448647_at   | -3.1 | Rc3h2                         | ring finger and CCCH-type zinc finger domains 2                                                                |
| 1434997_at   | -3.1 | Elk3                          | ELK3, member of ETS oncogene family                                                                            |
| 1417893_at   | -3.1 | Orc2l                         | origin recognition complex, subunit 2-like (S. cerevisiae)                                                     |
| 1423767_at   | -3.1 | Acat2 /// Acat3               | acetyl-Coenzyme A acetyltransferase 2 /// acetyl-Coenzyme A acetyltransferase 3                                |
| 1423806_at   | -3.2 | 1500001A10Rik                 | RIKEN cDNA 1500001A10 gene                                                                                     |
| 1428600_at   | -3.2 | Btaf1                         | BTAf1 RNA polymerase II, B-TFIIID transcription factor-associated, (Mot1 homolog, S. cerevisiae)               |
| 1448557_at   | -3.2 | Ckap4                         | cytoskeleton-associated protein 4                                                                              |
| 1427060_at   | -3.2 | Eaf1                          | ELL associated factor 1                                                                                        |
| 1423777_at   | -3.2 | Col4a5                        | collagen, type IV, alpha 5                                                                                     |
| 1416135_at   | -3.2 | Il33                          | interleukin 33                                                                                                 |
| 1431375_s_at | -3.2 | Ppib                          | peptidylprolyl isomerase B                                                                                     |
| 1456475_s_at | -3.2 | Iws1                          | IWS1 homolog (S. cerevisiae)                                                                                   |
| 1438847_at   | -3.2 | Dbi                           | diazepam binding inhibitor                                                                                     |
| 1416340_a_at | -3.2 | Gstm1                         | glutathione S-transferase, mu 1                                                                                |
| 1439381_x_at | -3.2 | Trim28                        | tripartite motif-containing 28                                                                                 |
| 1420928_at   | -3.2 | Cntf /// Zfp91 /// Zfp91-cntf | ciliary neurotrophic factor /// zinc finger protein 91 /// zinc finger protein 91, ciliary neurotrophic factor |
| 1439794_at   | -3.2 | Acpl2                         | transcription unit                                                                                             |
| 1417538_at   | -3.2 | Nab2                          | acid phosphatase-like 2                                                                                        |
| 1448124_at   | -3.2 | Nfkbia                        | Ngfi-A binding protein 2                                                                                       |
| 1433626_at   | -3.2 | Mat2a                         | Nuclear factor of kappa light polypeptide gene enhancer in B-cells inhibitor, alpha (Nfkbia), mRNA             |
| 1451359_at   | -3.2 | Mef2d                         | methionine adenosyltransferase II, alpha                                                                       |
| 1426434_at   | -3.2 | Nars                          | myocyte enhancer factor 2D                                                                                     |
| 1422503_s_at | -3.2 | Qars                          | asparaginyl-tRNA synthetase                                                                                    |
| 1450629_at   | -3.2 | 5830408B19Rik                 | glutaminyl-tRNA synthetase                                                                                     |
| 1434975_x_at | -3.2 | Plcb3                         | RIKEN cDNA 5830408B19 gene                                                                                     |
| 1434518_at   | -3.2 | Rpn1                          | phospholipase C, beta 3                                                                                        |
| 1439264_x_at | -3.2 | Atp5g2                        | ribophorin I                                                                                                   |
| 1417544_a_at | -3.2 | Ap3d1                         | ATP synthase, H+ transporting, mitochondrial F0 complex, subunit c (subunit 9), isoform 2                      |
| 1436426_at   | -3.3 | Pvr                           | adaptor-related protein complex 3, delta 1 subunit                                                             |
| 1449151_at   | -3.3 | Wdr43                         | poliovirus receptor                                                                                            |
| 1437401_at   | -3.3 | 6820431F20Rik                 | WD repeat domain 43                                                                                            |
| 1424296_at   | -3.3 | Sgms1                         | RIKEN cDNA 6820431F20 gene                                                                                     |
| 1426774_at   | -3.3 | Cyld                          | sphingomyelin synthase 1                                                                                       |
| 1451284_at   | -3.3 | Cnot6l                        | cylindromatosis (turban tumor syndrome)                                                                        |
| 1415698_at   | -3.3 | Golm1                         | CCR4-NOT transcription complex, subunit 6-like                                                                 |
| 1454741_s_at | -3.3 | Snhg1                         | golgi membrane protein 1                                                                                       |
|              |      |                               | small nucleolar RNA host gene (non-protein coding) 1                                                           |

|              |      |                          |                                                                                                             |
|--------------|------|--------------------------|-------------------------------------------------------------------------------------------------------------|
| 1422833_at   | -3.3 | Ints4                    | integrator complex subunit 4                                                                                |
| 1422747_at   | -3.3 | Dap                      | death-associated protein                                                                                    |
| 1433887_at   | -3.3 | Heatr5b                  | HEAT repeat containing 5B                                                                                   |
| 1435682_at   | -3.3 | Slc2a8                   | solute carrier family 2, (facilitated glucose transporter), member 8                                        |
| 1437185_s_at | -3.3 | Apaf1                    | apoptotic peptidase activating factor 1                                                                     |
| 1424828_at   | -3.3 | Dnajc10 /// LOC100047007 | DnaJ (Hsp40) homolog, subfamily C, member 10 /// similar to DnaJ (Hsp40) homolog, subfamily C, member 10    |
| 1435344_at   | -3.3 | Txnrd3                   | thioredoxin reductase 3                                                                                     |
| 1450560_a_at | -3.3 | 2810474O19Rik            | RIKEN cDNA 2810474O19 gene                                                                                  |
| 1416258_at   | -3.3 | Litaf                    | LPS-induced TN factor                                                                                       |
| 1423782_at   | -3.3 | Zfp62                    | zinc finger protein 62                                                                                      |
| 1436960_at   | -3.3 | 2810474O19Rik            | RIKEN cDNA 2810474O19 gene                                                                                  |
| 1419577_at   | -3.3 | Adh7                     | alcohol dehydrogenase 7 (class IV), mu or sigma polypeptide                                                 |
| 1416657_at   | -3.3 | Lrp10                    | low-density lipoprotein receptor-related protein 10                                                         |
| 1448928_at   | -3.3 | 2810474O19Rik            | RIKEN cDNA 2810474O19 gene                                                                                  |
| 1448311_at   | -3.3 | Arhgef12                 | Rho guanine nucleotide exchange factor (GEF) 12                                                             |
| 1435368_a_at | -3.3 | Fnip1                    | folliculin interacting protein 1                                                                            |
| 1423695_at   | -3.3 | Zkscan5                  | zinc finger with KRAB and SCAN domains 5                                                                    |
| 1447522_s_at | -3.3 | Clca1                    | chloride channel calcium activated 1                                                                        |
| 1442280_at   | -3.3 | BC003267                 | cDNA sequence BC003267                                                                                      |
| 1448960_at   | -3.3 | Zwint                    | ZW10 interactor                                                                                             |
| 1437194_x_at | -3.3 | Dip2a /// LOC100044059   | DIP2 disco-interacting protein 2 homolog A (Drosophila) /// similar to mKIAA0184 protein                    |
| 1435666_at   | -3.3 | Ppp2r5d                  | protein phosphatase 2, regulatory subunit B (B56), delta isoform                                            |
| 1427938_at   | -3.3 | 4632419I22Rik            | RIKEN cDNA 4632419I22 gene                                                                                  |
| 1423648_at   | -3.3 | Usp19                    | ubiquitin specific peptidase 19                                                                             |
| 1416836_at   | -3.3 | Rrs1                     | RRS1 ribosome biogenesis regulator homolog (S. cerevisiae)                                                  |
| 1448279_at   | -3.3 | Smad7                    | MAD homolog 7 (Drosophila)                                                                                  |
| 1452181_at   | -3.3 | Elk3                     | ELK3, member of ETS oncogene family                                                                         |
| 1433639_at   | -3.3 | Pttg1                    | pituitary tumor-transforming gene 1                                                                         |
| 1451356_at   | -3.3 | Heca                     | headcase homolog (Drosophila)                                                                               |
| 1416125_at   | -3.3 | Inpp5k                   | inositol polyphosphate 5-phosphatase K                                                                      |
| 1433979_at   | -3.4 | LOC674712 /// Ptdss1     | similar to phosphatidylinositol synthase 1 /// phosphatidylinositol synthase 1                              |
| 1428559_at   | -3.4 | Pip5k1a                  | phosphatidylinositol-4-phosphate 5-kinase, type 1 alpha                                                     |
| 1434543_a_at | -3.4 | Ttc3                     | tetratricopeptide repeat domain 3                                                                           |
| 1422438_at   | -3.4 | Fkbp9                    | FK506 binding protein 9                                                                                     |
| 1448330_at   | -3.4 | Mospd2                   | motile sperm domain containing 2                                                                            |
| 1428624_at   | -3.4 | Mboat1                   | membrane bound O-acyltransferase domain containing 1                                                        |
| 1435926_at   | -3.4 | Ccnb2                    | cyclin B2                                                                                                   |
| 1428801_at   | -3.4 | Lars2                    | leucyl-tRNA synthetase, mitochondrial                                                                       |
| 1453731_a_at | -3.4 | Mcc                      | mutated in colorectal cancers                                                                               |
| 1452210_at   | -3.4 | Hook3                    | hook homolog 3 (Drosophila)                                                                                 |
| 1451731_at   | -3.4 | Ppp1r12b                 | protein phosphatase 1, regulatory (inhibitor) subunit 12B                                                   |
| 1439965_at   | -3.4 | Cyr61                    | cysteine rich protein 61                                                                                    |
| 1420498_a_at | -3.4 | Tusc3                    | tumor suppressor candidate 3                                                                                |
| 1450355_a_at | -3.4 | Arsb                     | arylsulfatase B                                                                                             |
| 1417403_at   | -3.4 | Eif2s2                   | eukaryotic translation initiation factor 2, subunit 2 (beta)                                                |
| 1434228_at   | -3.4 | Atf4                     | activating transcription factor 4                                                                           |
|              |      | 100043718 ///            |                                                                                                             |
|              |      | LOC100048508 ///         |                                                                                                             |
|              |      | OTTMUSG00000012957 ///   | predicted gene, 100043718 /// similar to Rpl36 protein /// predicted gene, OTTMUSG00000012957 /// ribosomal |
| 1416416_x_at | -3.5 | Rpl36                    | protein L36                                                                                                 |
| 1428236_at   | -3.5 | Zeb2                     | zinc finger E-box binding homeobox 2                                                                        |
| 1448797_at   | -3.5 | Zfp26                    | zinc finger protein 26                                                                                      |
| 1423650_at   | -3.5 | Slc25a25                 | solute carrier family 25 (mitochondrial carrier, phosphate carrier), member 25                              |
| 1424320_a_at | -3.5 | Tmem184c                 | transmembrane protein 184C                                                                                  |
| 1420603_s_at | -3.5 | Ldlr                     | low density lipoprotein receptor                                                                            |
| 1448661_at   | -3.5 | Aim1                     | absent in melanoma 1                                                                                        |
| 1434413_at   | -3.5 | Tmem19                   | transmembrane protein 19                                                                                    |
| 1453370_at   | -3.5 | Phf2011                  | PHD finger protein 20-like 1                                                                                |
| 1438386_x_at | -3.5 | Rpl41                    | ribosomal protein L41                                                                                       |
| 1448498_at   | -3.5 | Rbm26                    | RNA binding motif protein 26                                                                                |
| 1435797_at   | -3.5 | Brd4                     | bromodomain containing 4                                                                                    |
| 1435450_at   | -3.5 | Idh2                     | isocitrate dehydrogenase 2 (NADP+), mitochondrial                                                           |
| 1452133_at   | -3.5 | Hivep2                   | human immunodeficiency virus type I enhancer binding protein 2                                              |
| 1452769_at   | -3.5 | Ociad2                   | OCIA domain containing 2                                                                                    |
| 1416429_a_at | -3.5 | Ctps                     | cytidine 5'-triphosphate synthase                                                                           |
| 1438633_x_at | -3.5 | Fam149a                  | family with sequence similarity 149, member A                                                               |
| 1434395_at   | -3.5 | Cndp2                    | CNDP dipeptidase 2 (metallopeptidase M20 family)                                                            |
| 1426015_s_at | -3.5 | 1600012H06Rik            | RIKEN cDNA 1600012H06 gene                                                                                  |
| 1455481_at   | -3.5 | Pctk3                    | PCTAIRE-motif protein kinase 3                                                                              |
| 1455789_x_at | -3.5 | Prr12                    | proline rich 12                                                                                             |
| 1435395_s_at | -3.5 | Zfand2a                  | zinc finger, AN1-type domain 2A                                                                             |
| 1416217_a_at | -3.6 | Mapksp1                  | MAPK scaffold protein 1                                                                                     |
| 1448569_at   | -3.6 | Parp12                   | poly (ADP-ribose) polymerase family, member 12                                                              |
| 1450388_s_at | -3.6 | Stard4                   | StAR-related lipid transfer (START) domain containing 4                                                     |
| 1424085_at   | -3.6 | Rbm26                    | RNA binding motif protein 26                                                                                |
| 1417090_at   | -3.6 | Elov6                    | ELOVL family member 6, elongation of long chain fatty acids (yeast)                                         |
| 1448967_at   | -3.6 | Tmem158                  | transmembrane protein 158                                                                                   |
| 1428429_at   | -3.6 | Slc25a4                  | solute carrier family 25 (mitochondrial carrier, adenine nucleotide translocator), member 4                 |
| 1448275_at   | -3.6 | Irs1                     | insulin receptor substrate 1                                                                                |
| 1428259_at   | -3.6 | Axud1                    | AXIN1 up-regulated 1                                                                                        |
| 1416780_at   | -3.6 | Tbc1d8                   | TBC1 domain family, member 8                                                                                |
| 1426880_at   | -3.6 | Cldnd1                   | claudin domain containing 1                                                                                 |
| 1449036_at   | -3.6 | Arl8b                    | ADP-ribosylation factor-like 8B                                                                             |
| 1434183_at   | -3.6 | Nono                     | non-POU-domain-containing, octamer binding protein                                                          |
| 1416896_at   | -3.7 | Trim2                    | tripartite motif-containing 2                                                                               |
| 1435649_at   | -3.7 | Slc48a1                  | solute carrier family 48 (heme transporter), member 1                                                       |

|              |      |                   |                                                                                                             |
|--------------|------|-------------------|-------------------------------------------------------------------------------------------------------------|
| 1430526_a_at | -3.7 | Pgd               | phosphogluconate dehydrogenase                                                                              |
| 1440880_at   | -3.7 | Hadh              | hydroxyacyl-Coenzyme A dehydrogenase                                                                        |
| 1439815_at   | -3.7 | Zfp800            | zinc finger protein 800                                                                                     |
| 1428146_s_at | -3.7 | Atp5k             | ATP synthase, H+ transporting, mitochondrial F1F0 complex, subunit e                                        |
|              |      | 1190002N15Rik /// |                                                                                                             |
| 1450872_s_at | -3.7 | LOC100044725      | RIKEN cDNA 1190002N15 gene /// hypothetical protein LOC100044725                                            |
| 1425616_a_at | -3.7 | Nfkb1             | nuclear factor of kappa light polypeptide gene enhancer in B-cells 1, p105                                  |
| 1448433_a_at | -3.7 | 5430435G22Rik     | RIKEN cDNA 5430435G22 gene                                                                                  |
| 1424157_at   | -3.7 | Nol5a             | nucleolar protein 5A                                                                                        |
| 1460692_at   | -3.8 | Glg1              | golgi apparatus protein 1                                                                                   |
| 1438724_at   | -3.8 | Crkrs             | CDC2-related kinase, arginine/serine-rich                                                                   |
| 1422525_at   | -3.8 | Tram1             | translocating chain-associating membrane protein 1                                                          |
| 1434628_a_at | -3.8 | Smarcd2           | SWI/SNF related, matrix associated, actin dependent regulator of chromatin, subfamily d, member 2           |
| 1440795_x_at | -3.8 | Ext2              | exostoses (multiple) 2                                                                                      |
| 1419435_at   | -3.8 | Tgfb1             | transforming growth factor, beta receptor I                                                                 |
| 1429081_at   | -3.8 | Fen1              | flap structure specific endonuclease 1                                                                      |
| 1433582_at   | -3.8 | Ppp2r1a           | protein phosphatase 2 (formerly 2A), regulatory subunit A (PR 65), alpha isoform                            |
| 1455878_at   | -3.8 | Cited2            | Cbp/p300-interacting transactivator, with Glu/Asp-rich carboxy-terminal domain, 2                           |
| 1421469_a_at | -3.8 | Kif5c             | kinesin family member 5C                                                                                    |
| 1416261_at   | -3.8 | Crip1             | cysteine-rich protein 1 (intestinal)                                                                        |
| 1449084_s_at | -3.8 | Prkd3             | protein kinase D3                                                                                           |
| 1417027_at   | -3.8 | Cadm1             | cell adhesion molecule 1                                                                                    |
| 1428853_at   | -3.8 | Ap3s2             | adaptor-related protein complex 3, sigma 2 subunit                                                          |
| 1418318_at   | -3.8 | S100a13           | S100 calcium binding protein A13                                                                            |
| 1433576_at   | -3.8 | Ndufv2            | NADH dehydrogenase (ubiquinone) flavoprotein 2                                                              |
| 1453155_at   | -3.9 | 2810474O19Rik     | RIKEN cDNA 2810474O19 gene                                                                                  |
| 1428684_at   | -3.9 | Ttc28             | tetratricopeptide repeat domain 28                                                                          |
| 1438630_x_at | -3.9 | Hspa8             | heat shock protein 8                                                                                        |
| 1434365_a_at | -3.9 | Gm2a              | GM2 ganglioside activator protein                                                                           |
| 1426628_at   | -3.9 | Fgfr1op           | Fgfr1 oncogene partner                                                                                      |
| 1449303_at   | -3.9 | Reep4             | receptor accessory protein 4                                                                                |
| 1438055_at   | -3.9 | Pogz              | pogo transposable element with ZNF domain                                                                   |
| 1416750_at   | -3.9 | Gtse1             | G two S phase expressed protein 1                                                                           |
| 1448196_at   | -3.9 | Man1a2            | mannosidase, alpha, class 1A, member 2                                                                      |
| 1417283_at   | -3.9 | LOC100046775 ///  | similar to CMP-sialic acid transporter /// solute carrier family 35 (CMP-sialic acid transporter), member 1 |
| 1426873_s_at | -3.9 | Daam1             | dishevelled associated activator of morphogenesis 1                                                         |
| 1452346_at   | -3.9 | LOC547150         | similar to p47 protein                                                                                      |
| 1421853_at   | -3.9 | Pcyox1            | pernilycysteine oxidase 1                                                                                   |
| 1434123_at   | -3.9 | Ankhd1 ///        | ankyrin repeat and KH domain containing 1 /// eukaryotic translation initiation factor 4E binding protein 3 |
| 1425475_at   | -3.9 | Napb              | N-ethylmaleimide sensitive fusion protein attachment protein beta                                           |
| 1426782_at   | -4.0 | Fam175a           | family with sequence similarity 175, member A                                                               |
| 1455793_at   | -4.0 | H2-K1             | MRNA similar to histocompatibility 2, D region locus 1 (cDNA clone MGC:25703 IMAGE:3675316)                 |
| 1451339_at   | -4.0 | Man1a2            | mannosidase, alpha, class 1A, member 2                                                                      |
| 1450640_x_at | -4.0 | 1700094D03Rik     | RIKEN cDNA 1700094D03 gene                                                                                  |
| 1428789_at   | -4.0 | Opcml             | opioid binding protein/cell adhesion molecule-like                                                          |
| 1435727_s_at | -4.0 | Atp5k             | ATP synthase, H+ transporting, mitochondrial F1F0 complex, subunit e                                        |
| 1417311_at   | -4.0 | Flot2             | flotillin 2                                                                                                 |
| 1416430_at   | -4.0 | Sparc             | secreted acidic cysteine rich glycoprotein                                                                  |
| 1428508_at   | -4.0 | Fam5c             | family with sequence similarity 5, member C                                                                 |
| 1415707_at   | -4.0 | Anapc2            | anaphase promoting complex subunit 2                                                                        |
| 1448496_a_at | -4.0 | Far1              | fatty acyl CoA reductase 1                                                                                  |
| 1423917_a_at | -4.0 | Mapre2            | microtubule-associated protein, RP/EB family, member 2                                                      |
| 1449343_s_at | -4.0 | Kdsr              | 3-ketodihydroshpingosine reductase                                                                          |
| 1428082_at   | -4.0 | Dbi               | diazepam binding inhibitor                                                                                  |
| 1447917_x_at | -4.0 | Mttp              | microsomal triglyceride transfer protein                                                                    |
| 1425472_a_at | -4.0 | Sfrs10            | splicing factor, arginine/serine-rich 10 (transformer 2 homolog, Drosophila)                                |
| 1428382_at   | -4.0 | Sbno1             | sno, strawberry notch homolog 1 (Drosophila)                                                                |
| 1428218_a_at | -4.0 | Ppm2c             | protein phosphatase 2C, magnesium dependent, catalytic subunit                                              |
| 1422888_at   | -4.0 | Tuba1b            | tubulin, alpha 1B                                                                                           |
| 1434105_at   | -4.0 | Ntn1              | N-terminal Asn amidase                                                                                      |
| 1415718_at   | -4.1 | Eif5              | eukaryotic translation initiation factor 5                                                                  |
| 1433770_at   | -4.1 | D430028G21Rik     | RIKEN cDNA D430028G21 gene                                                                                  |
| 1423046_s_at | -4.1 | Ctnn              | cortactin                                                                                                   |
| 1436900_x_at | -4.1 | Skil              | SKI-like                                                                                                    |
| 1417930_at   | -4.1 | Ivd               | isovaleryl coenzyme A dehydrogenase                                                                         |
| 1416999_at   | -4.1 | Lynx1             | Ly6/neurotoxin 1                                                                                            |
| 1416167_at   | -4.1 | Aqp1              | aquaporin 1                                                                                                 |
| 1428340_s_at | -4.1 | Ugp2              | UDP-glucose pyrophosphorylase 2                                                                             |
| 1417272_at   | -4.1 | Fosl1             | fos-like antigen 1                                                                                          |
| 1416365_at   | -4.1 | Cat               | catalase                                                                                                    |
| 1438988_x_at | -4.1 | Brd9              | bromodomain containing 9                                                                                    |
| 1452225_at   | -4.1 | Tbc1d4            | TBC1 domain family, member 4                                                                                |
| 1435652_a_at | -4.1 | Nedd4             | neural precursor cell expressed, developmentally down-regulated 4                                           |
| 1438093_x_at | -4.1 | Sgsm2             | small G protein signaling modulator 2                                                                       |
| 1417404_at   | -4.1 | Anxa8             | annexin A8                                                                                                  |
| 1423071_x_at | -4.1 | Tspan14           | tetraspanin 14                                                                                              |
| 1422445_at   | -4.2 | Fads1             | fatty acid desaturase 1                                                                                     |
|              |      | 1190002N15Rik /// |                                                                                                             |
| 1450889_at   | -4.2 | LOC100044725      | RIKEN cDNA 1190002N15 gene /// hypothetical protein LOC100044725                                            |
| 1459800_s_at | -4.2 | Pten              | phosphatase and tensin homolog                                                                              |
| 1425506_at   | -4.2 | Eif6              | eukaryotic translation initiation factor 6                                                                  |
| 1418220_at   | -4.2 | Fzd2              | frizzled homolog 2 (Drosophila)                                                                             |
| 1416988_at   | -4.3 | Lpar1             | lysophosphatidic acid receptor 1                                                                            |
| 1448180_a_at | -4.3 | Slc25a30          | solute carrier family 25, member 30                                                                         |
| 1421844_at   | -4.3 | Pitpna            | phosphatidylinositol transfer protein, alpha                                                                |
| 1449901_a_at | -4.3 | Filip1l           | filamin A interacting protein 1-like                                                                        |



|              |      |                             |                                                                                                                                                              |
|--------------|------|-----------------------------|--------------------------------------------------------------------------------------------------------------------------------------------------------------|
| 1433908_a_at | -4.3 | Gabpb2                      | GA repeat binding protein, beta 2                                                                                                                            |
| 1428296_at   | -4.3 | Fnip1                       | folliculin interacting protein 1                                                                                                                             |
| 1435557_at   | -4.3 | Epdr1                       | ependymin related protein 1 (zebrafish)                                                                                                                      |
| 1435292_at   | -4.3 | Sin3a                       | transcriptional regulator, SIN3A (yeast)                                                                                                                     |
| 1451128_s_at | -4.3 | Faah                        | fatty acid amide hydrolase                                                                                                                                   |
| 1417852_x_at | -4.3 | Mnt                         | max binding protein                                                                                                                                          |
| 1452330_a_at | -4.4 | Braf                        | Braf transforming gene                                                                                                                                       |
| 1417384_at   | -4.4 | Cpsf1                       | cleavage and polyadenylation specific factor 1                                                                                                               |
| 1426942_at   | -4.4 | Cct4                        | chaperonin containing Tcp1, subunit 4 (delta)                                                                                                                |
|              |      | 100041163 /// 100041478 /// |                                                                                                                                                              |
|              |      | ENSMUSG00000063556 ///      |                                                                                                                                                              |
|              |      | ENSMUSG00000071532 ///      | predicted gene, 100041163 /// predicted gene, 100041478 /// predicted gene, ENSMUSG00000063556 ///                                                           |
| 1424438_a_at | -4.4 | LOC100046821 /// Rpl23a     | predicted gene, ENSMUSG00000071532 /// similar to ribosomal protein L23a /// ribosomal protein L23a                                                          |
| 1453372_at   | -4.4 | Dcbl2                       | discoidin, CUB and LCCL domain containing 2                                                                                                                  |
| 1416269_at   | -4.4 | Hsp90ab1                    | heat shock protein 90 alpha (cytosolic), class B member 1                                                                                                    |
| 1439830_at   | -4.4 | Rrs1                        | RRS1 ribosome biogenesis regulator homolog (S. cerevisiae)                                                                                                   |
| 1428325_at   | -4.4 | Igf1                        | insulin-like growth factor 1                                                                                                                                 |
| 1452381_at   | -4.4 | 1810013L24Rik               | RIKEN cDNA 1810013L24 gene                                                                                                                                   |
| 1415890_at   | -4.5 | Scd1                        | stearoyl-Coenzyme A desaturase 1                                                                                                                             |
| 1418257_at   | -4.5 | Notch1                      | Notch gene homolog 1 (Drosophila)                                                                                                                            |
| 1426778_at   | -4.5 | Patz1                       | POZ (BTB) and AT hook containing zinc finger 1                                                                                                               |
| 1422603_at   | -4.5 | Dpy30                       | dpy-30 homolog (C. elegans)                                                                                                                                  |
| 1448392_at   | -4.5 | Fh1                         | fumarate hydratase 1                                                                                                                                         |
| 1418884_x_at | -4.5 | Ngf                         | nerve growth factor                                                                                                                                          |
| 1428647_at   | -4.5 | Tfdp2                       | transcription factor Dp 2                                                                                                                                    |
| 1418072_at   | -4.5 | Cd97                        | CD97 antigen                                                                                                                                                 |
| 1428883_at   | -4.6 | 1810063B05Rik               | RIKEN cDNA 1810063B05 gene                                                                                                                                   |
| 1415964_at   | -4.6 | Prdx1                       | peroxiredoxin 1                                                                                                                                              |
| 1452213_at   | -4.6 | Crebbp                      | CREB binding protein                                                                                                                                         |
| 1423960_at   | -4.6 | Dimt1                       | DIM1 dimethyladenosine transferase 1-like (S. cerevisiae)                                                                                                    |
| 1428522_at   | -4.6 | Cdc2l6                      | cell division cycle 2-like 6 (CDK8-like)                                                                                                                     |
|              |      | ENSMUSG00000045799 ///      |                                                                                                                                                              |
| 1421997_s_at | -4.6 | Ptma                        | predicted gene, ENSMUSG00000045799 /// prothymosin alpha                                                                                                     |
| 1416330_at   | -4.6 | H2afz                       | H2A histone family, member Z                                                                                                                                 |
| 1416860_s_at | -4.6 | Smpd2                       | sphingomyelin phosphodiesterase 2, neutral                                                                                                                   |
| 1421654_a_at | -4.6 | Lipa                        | lysosomal acid lipase A                                                                                                                                      |
| 1457670_s_at | -4.7 | Lpp                         | LIM domain containing preferred translocation partner in lipoma                                                                                              |
| 1460554_s_at | -4.7 | Nlrc3                       | NLR family, CARD domain containing 3                                                                                                                         |
| 1434037_s_at | -4.7 | Bub1b                       | budding uninhibited by benzimidazoles 1 homolog, beta (S. cerevisiae)                                                                                        |
| 1422433_s_at | -4.7 | Mat2a                       | methionine adenosyltransferase II, alpha                                                                                                                     |
| 1428738_a_at | -4.7 | Atad5                       | ATPase family, AAA domain containing 5                                                                                                                       |
| 1420895_at   | -4.7 | Ets1                        | E26 avian leukemia oncogene 1, 5' domain                                                                                                                     |
| 1420619_a_at | -4.7 | Il1rap                      | interleukin 1 receptor accessory protein                                                                                                                     |
| 1455470_x_at | -4.7 | E330009J07Rik               | RIKEN cDNA E330009J07 gene                                                                                                                                   |
| 1434891_at   | -4.7 | Fam13c                      | family with sequence similarity 13, member C                                                                                                                 |
| 1426716_at   | -4.7 | Anxa6                       | annexin A6                                                                                                                                                   |
| 1438634_x_at | -4.7 | Kctd3                       | potassium channel tetramerisation domain containing 3                                                                                                        |
| 1415760_s_at | -4.7 | Gsn                         | gelsolin                                                                                                                                                     |
| 1435140_at   | -4.7 | Prim1                       | DNA primase, p49 subunit                                                                                                                                     |
| 1416032_at   | -4.7 | Ifrd1                       | interferon-related developmental regulator 1                                                                                                                 |
| 1426952_at   | -4.7 | Abtb2                       | ankyrin repeat and BTB (POZ) domain containing 2                                                                                                             |
| 1434387_at   | -4.8 | Glud1                       | glutamate dehydrogenase 1                                                                                                                                    |
| 1429739_a_at | -4.8 | Gsn                         | gelsolin                                                                                                                                                     |
| 1452037_at   | -4.8 | Dpy19l4                     | dpy-19-like 4 (C. elegans)                                                                                                                                   |
| 1423790_at   | -4.8 | Cd74                        | CD74 antigen (invariant polypeptide of major histocompatibility complex, class II antigen-associated)                                                        |
| 1418704_at   | -4.8 | Sfrs10                      | splicing factor, arginine/serine-rich 10 (transformer 2 homolog, Drosophila)                                                                                 |
| 1418924_at   | -4.8 | Cxcl11 /// LOC630447        | chemokine (C-X-C motif) ligand 11 /// similar to Small inducible cytokine B11 precursor (CXCL11) (Interferon-inducible T-cell alpha chemoattractant) (I-TAC) |
| 1436824_x_at | -4.8 | Fbxo18                      | F-box protein 18                                                                                                                                             |
| 1423739_x_at | -4.8 | Csf1                        | colony stimulating factor 1 (macrophage)                                                                                                                     |
| 1456726_x_at | -4.8 | Strn                        | striatin, calmodulin binding protein                                                                                                                         |
| 1448380_at   | -4.9 | Cald1                       | caldesmon 1                                                                                                                                                  |
| 1435735_x_at | -4.9 | Vim                         | vimentin                                                                                                                                                     |
| 1455221_at   | -4.9 | Tnks2                       | tankyrase, TRF1-interacting ankyrin-related ADP-ribose polymerase 2                                                                                          |
| 1424105_a_at | -4.9 | Nr1d1                       | nuclear receptor subfamily 1, group D, member 1                                                                                                              |
| 1433504_at   | -4.9 | EG626950 /// H2afz          | predicted gene, EG626950 /// H2A histone family, member Z                                                                                                    |
| 1436796_at   | -5.0 | H47                         | histocompatibility 47                                                                                                                                        |
| 1435143_at   | -5.0 | Sh3d19                      | SH3 domain protein D19                                                                                                                                       |
| 1417644_at   | -5.0 | Myo9b                       | myosin IXb                                                                                                                                                   |
| 1451114_at   | -5.0 | Atp8b2                      | ATPase, class I, type 8B, member 2                                                                                                                           |
| 1449865_at   | -5.0 | Ptch1                       | patched homolog 1                                                                                                                                            |
| 1418746_at   | -5.0 | Mdm4                        | transformed mouse 3T3 cell double minute 4                                                                                                                   |
| 1423732_at   | -5.0 | EG621629 /// Ubxn2a         | predicted gene, EG621629 /// UBX domain protein 2A                                                                                                           |
| 1421821_at   | -5.0 | Napb                        | N-ethylmaleimide sensitive fusion protein attachment protein beta                                                                                            |
| 1448400_a_at | -5.1 | A830007P12Rik               | RIKEN cDNA A830007P12 gene                                                                                                                                   |
| 1452754_at   | -5.1 | Itns1                       | intersectin 1 (SH3 domain protein 1A)                                                                                                                        |
| 1417450_a_at | -5.1 | Caml                        | calcium modulating ligand                                                                                                                                    |
| 1418496_at   | -5.1 | Ero1l                       | ERO1-like (S. cerevisiae)                                                                                                                                    |
| 1448619_at   | -5.1 | Arndc4                      | arrestin domain containing 4                                                                                                                                 |
| 1450410_a_at | -5.1 | Eny2                        | enhancer of yellow 2 homolog (Drosophila)                                                                                                                    |
| 1454658_at   | -5.1 | Nos1                        | nitric oxide synthase 1, neuronal                                                                                                                            |
| 1455257_at   | -5.1 | Jmjd3                       | jumonji domain containing 3                                                                                                                                  |
| 1450862_at   | -5.1 | LOC100047863 /// Sh2b3      | similar to lymphocyte-specific adaptor protein Lnk /// SH2B adaptor protein 3                                                                                |
| 1425194_a_at | -5.1 | Hmgcr                       | 3-hydroxy-3-methylglutaryl-Coenzyme A reductase                                                                                                              |
| 1416967_at   | -5.1 | Rcn1                        | reticulocalbin 1                                                                                                                                             |
| 1448491_at   | -5.2 | 2810403A07Rik               | RIKEN cDNA 2810403A07 gene                                                                                                                                   |

|              |      |                          |                                                                                                          |
|--------------|------|--------------------------|----------------------------------------------------------------------------------------------------------|
| 1418595_at   | -5.2 | Klf7                     | Kruppel-like factor 7 (ubiquitous)                                                                       |
| 1436959_x_at | -5.2 | Bcr                      | breakpoint cluster region                                                                                |
| 1433581_at   | -5.2 | Flot2                    | flotillin 2                                                                                              |
| 1420416_at   | -5.2 | Lmna                     | lamin A                                                                                                  |
| 1460409_at   | -5.3 | Chd1                     | chromodomain helicase DNA binding protein 1                                                              |
| 1416667_at   | -5.3 | Stam                     | signal transducing adaptor molecule (SH3 domain and ITAM motif) 1                                        |
| 1415753_at   | -5.3 | Wdr6                     | WD repeat domain 6                                                                                       |
| 1447277_s_at | -5.3 | Siae                     | sialic acid acetyltransferase                                                                            |
| 1450409_a_at | -5.3 | Clcn5                    | chloride channel 5                                                                                       |
| 1437380_x_at | -5.3 | Ppp2r2a                  | protein phosphatase 2 (formerly 2A), regulatory subunit B (PR 52), alpha isoform                         |
| 1452919_a_at | -5.4 | Card6                    | caspase recruitment domain family, member 6                                                              |
| 1433702_at   | -5.4 | Adam15                   | a disintegrin and metalloproteinase domain 15 (metargidin)                                               |
| 1454893_at   | -5.4 | Gigyf2                   | GRB10 interacting GYF protein 2                                                                          |
| 1455976_x_at | -5.4 | Rnf145                   | ring finger protein 145                                                                                  |
| 1451115_at   | -5.4 | Mafg                     | v-maf musculoaponeurotic fibrosarcoma oncogene family, protein G (avian)                                 |
| 1452143_at   | -5.5 | Pik3r5                   | phosphoinositide-3-kinase, regulatory subunit 5, p101                                                    |
| 1429089_s_at | -5.5 | Ppig                     | peptidyl-prolyl isomerase G (cyclophilin G)                                                              |
| 1449254_at   | -5.5 | Zcchc24                  | zinc finger, CCHC domain containing 24                                                                   |
| 1460173_at   | -5.5 | Galnt4                   | UDP-N-acetyl-alpha-D-galactosamine:polypeptide N-acetylgalactosaminyltransferase 4                       |
| 1426690_a_at | -5.5 | Gcc2                     | GRIP and coiled-coil domain containing 2                                                                 |
| 1435917_at   | -5.6 | Lipa                     | lysosomal acid lipase A                                                                                  |
| 1416368_at   | -5.6 | Cat                      | catalase                                                                                                 |
| 1420046_s_at | -5.6 | Asb10                    | ankyrin repeat and SOCS box-containing 10                                                                |
| 1452040_a_at | -5.6 | Plekha7                  | pleckstrin homology domain containing, family A member 7                                                 |
| 1428432_at   | -5.6 | Esf1                     | ESF1, nucleolar pre-rRNA processing protein, homolog (S. cerevisiae)                                     |
| 1452908_at   | -5.6 | Nfix                     | nuclear factor I/X                                                                                       |
| 1450982_at   | -5.6 | Tmem164                  | CDNA clone IMAGE:6815971                                                                                 |
| 1438627_x_at | -5.7 | Hsd17b4                  | hydroxysteroid (17-beta) dehydrogenase 4                                                                 |
| 1435785_at   | -5.7 | Slc7a2                   | solute carrier family 7 (cationic amino acid transporter, y+ system), member 2                           |
| 1418467_at   | -5.7 | Klk1b5                   | kallikrein 1-related peptidase b5                                                                        |
| 1436771_x_at | -5.7 | Cdca3                    | cell division cycle associated 3                                                                         |
| 1422502_at   | -5.7 | Pgd                      | phosphogluconate dehydrogenase                                                                           |
| 1415865_s_at | -5.7 | Zfand2a                  | zinc finger, AN1-type domain 2A                                                                          |
| 1423282_at   | -5.7 | Pttg1                    | pituitary tumor-transforming gene 1                                                                      |
| 1450920_at   | -5.8 | Rgmb                     | RGM domain family, member B                                                                              |
| 1460241_a_at | -5.8 | Ppargc1a                 | peroxisome proliferative activated receptor, gamma, coactivator 1 alpha                                  |
| 1421840_at   | -5.8 | Inpp5e                   | inositol polyphosphate-5-phosphatase E                                                                   |
| 1423712_a_at | -5.8 | Anxa13                   | annexin A13                                                                                              |
| 1460259_s_at | -5.9 | Marcks                   | myristoylated alanine rich protein kinase C substrate                                                    |
| 1448704_s_at | -5.9 | Plk2                     | polo-like kinase 2 (Drosophila)                                                                          |
| 1423394_at   | -5.9 | Ehd2                     | EH-domain containing 2                                                                                   |
| 1438164_x_at | -6.0 | Tmem62                   | transmembrane protein 62                                                                                 |
| 1424829_at   | -6.0 | Dnajc10 /// LOC100047007 | DnaJ (Hsp40) homolog, subfamily C, member 10 /// similar to DnaJ (Hsp40) homolog, subfamily C, member 10 |
| 1416044_at   | -6.0 | Nnt                      | nicotinamide nucleotide transhydrogenase                                                                 |
| 1434270_at   | -6.0 | Hn1                      | hematological and neurological expressed sequence 1                                                      |
| 1426245_s_at | -6.0 | Atxn11                   | ataxin 7-like 1                                                                                          |
| 1449056_at   | -6.0 | Arl8b                    | ADP-ribosylation factor-like 8B                                                                          |
| 1416256_a_at | -6.0 | Ctns                     | cystinosis, nephropathic                                                                                 |
| 1448215_a_at | -6.1 | Ankrd1                   | ankyrin repeat domain 1 (cardiac muscle)                                                                 |
| 1417460_at   | -6.1 | Clca1                    | chloride channel calcium activated 1                                                                     |
| 1424130_a_at | -6.1 | Nrp2 /// Pard3b          | neuropilin 2 /// par-3 partitioning defective 3 homolog B (C. elegans)                                   |
| 1418157_at   | -6.1 | Ggta1                    | glycoprotein galactosyltransferase alpha 1, 3                                                            |
| 1418533_s_at | -6.2 | Serpine1                 | serine (or cysteine) peptidase inhibitor, clade E, member 1                                              |
| 1438200_at   | -6.2 | Lasp1                    | LIM and SH3 protein 1                                                                                    |
| 1448292_at   | -6.2 | Myst4                    | MYST histone acetyltransferase monocytic leukemia 4                                                      |
| 1453634_a_at | -6.2 | Eea1                     | early endosome antigen 1                                                                                 |
| 1452244_at   | -6.3 | Ppig                     | peptidyl-prolyl isomerase G (cyclophilin G)                                                              |
| 1448533_at   | -6.3 | Ovgp1                    | oviductal glycoprotein 1                                                                                 |
| 1451126_at   | -6.3 | Pctk2                    | PCTAIRE-motif protein kinase 2                                                                           |
| 1451413_at   | -6.4 | Atp13a3                  | ATPase type 13A3                                                                                         |
| 1416206_at   | -6.4 | Atp5j2                   | ATP synthase, H+ transporting, mitochondrial F0 complex, subunit f, isoform 2                            |
| 1415984_at   | -6.5 | Klf10                    | Kruppel-like factor 10                                                                                   |
| 1423706_a_at | -6.5 | Rab13                    | RAB13, member RAS oncogene family                                                                        |
| 1427347_s_at | -6.5 | Rps21                    | ribosomal protein S21                                                                                    |
| 1416536_at   | -6.6 | Tcf4                     | transcription factor 4                                                                                   |
| 1416203_at   | -6.6 | Ets2                     | E26 avian leukemia oncogene 2, 3' domain                                                                 |
| 1426369_at   | -6.6 | Ttf2                     | transcription termination factor, RNA polymerase II                                                      |
| 1453055_at   | -6.6 | 9630058J23Rik            | RIKEN cDNA 9630058J23 gene                                                                               |
| 1448956_at   | -6.6 | Tubb2a                   | tubulin, beta 2a                                                                                         |
| 1442340_x_at | -6.7 | Siae                     | sialic acid acetyltransferase                                                                            |
| 1436991_x_at | -6.7 | Erdr1                    | erythroid differentiation regulator 1                                                                    |
| 1416200_at   | -6.7 | Tmem19                   | transmembrane protein 19                                                                                 |
| 1428707_at   | -6.8 | Irgq                     | immunity-related GTPase family, Q                                                                        |
| 1428708_x_at | -6.8 | Fhod1                    | formin homology 2 domain containing 1                                                                    |
| 1457823_at   | -6.8 | 2310051F07Rik            | RIKEN cDNA 2310051F07 gene                                                                               |
|              |      | OTTMUSG00000016246 ///   |                                                                                                          |
| 1415818_at   | -6.8 | Rps29                    | predicted gene, OTTMUSG00000016246 /// ribosomal protein S29                                             |
| 1435864_a_at | -6.9 | Tnfai3                   | tumor necrosis factor, alpha-induced protein 3                                                           |
| 1436747_at   | -7.0 | Abca3                    | ATP-binding cassette, sub-family A (ABC1), member 3                                                      |
| 1433825_at   | -7.1 | Cdc20                    | cell division cycle 20 homolog (S. cerevisiae)                                                           |
| 1448354_at   | -7.1 | Lpcat1                   | lysophosphatidylcholine acyltransferase 1                                                                |
| 1436902_x_at | -7.1 | Dnajc10 /// LOC100047007 | DnaJ (Hsp40) homolog, subfamily C, member 10 /// similar to DnaJ (Hsp40) homolog, subfamily C, member 10 |
| 1460184_at   | -7.1 | Gclc                     | Glutamate-cysteine ligase, catalytic subunit, mRNA (cDNA clone MGC:30487 IMAGE:4195425)                  |
| 1423484_at   | -7.1 | Acaa1a /// Acaa1b        | acetyl-Coenzyme A acyltransferase 1A /// acetyl-Coenzyme A acyltransferase 1B                            |
| 1415995_at   | -7.2 | Tmem109                  | transmembrane protein 109                                                                                |
| 1416868_at   | -7.2 | Slc7a3                   | solute carrier family 7 (cationic amino acid transporter, y+ system), member 3                           |

|              |       |                             |                                                                                                              |
|--------------|-------|-----------------------------|--------------------------------------------------------------------------------------------------------------|
| 1434993_at   | -7.2  | Atpif1                      | ATPase inhibitory factor 1                                                                                   |
| 1436944_x_at | -7.2  | Mxra8                       | matrix-remodelling associated 8                                                                              |
| 1415770_at   | -7.3  | Anxa6                       | annexin A6                                                                                                   |
| 1456057_x_at | -7.3  | 6820431F20Rik               | RIKEN cDNA 6820431F20 gene                                                                                   |
| 1433991_x_at | -7.3  | Cyr61                       | cysteine rich protein 61                                                                                     |
| 1418840_at   | -7.4  | 4833420G17Rik               | RIKEN cDNA 4833420G17 gene                                                                                   |
| 1436029_at   | -7.4  | Got1                        | glutamate oxaloacetate transaminase 1, soluble                                                               |
| 1429390_at   | -7.5  | Mdh1                        | malate dehydrogenase 1, NAD (soluble)                                                                        |
| 1420623_x_at | -7.5  | Clstn1                      | calyntenin 1                                                                                                 |
| 1450966_at   | -7.6  | Slc44a1                     | solute carrier family 44, member 1                                                                           |
| 1428795_at   | -7.6  | Nexn                        | nexilin                                                                                                      |
| 1437008_x_at | -7.6  | 1200016E24Rik               | RIKEN cDNA 1200016E24 gene                                                                                   |
| 1417083_at   | -7.6  | Elovf6                      | ELOVL family member 6, elongation of long chain fatty acids (yeast)                                          |
| 1417056_at   | -7.7  | Fam132a                     | family with sequence similarity 132, member A                                                                |
| 1415812_at   | -7.7  | Scd2                        | stearoyl-Coenzyme A desaturase 2                                                                             |
| 1437171_x_at | -7.8  | 2010300C02Rik               | RIKEN cDNA 2010300C02 gene                                                                                   |
| 1438115_a_at | -7.8  | Pip5k1a                     | phosphatidylinositol-4-phosphate 5-kinase, type 1 alpha                                                      |
| 1456735_x_at | -7.9  | Igsf3                       | immunoglobulin superfamily, member 3                                                                         |
| 1454671_at   | -7.9  | Clic4                       | chloride intracellular channel 4 (mitochondrial)                                                             |
| 1428588_a_at | -8.0  | Baz2b                       | bromodomain adjacent to zinc finger domain, 2B                                                               |
| 1420622_a_at | -8.1  | Psen1                       | presenilin 1                                                                                                 |
| 1433751_at   | -8.1  | 4933439C20Rik               | RIKEN cDNA 4933439C20 gene                                                                                   |
| 1428074_at   | -8.2  | Rbms2                       | RNA binding motif, single stranded interacting protein 2                                                     |
| 1423642_at   | -8.2  | Eef1a1                      | eukaryotic translation elongation factor 1 alpha 1                                                           |
| 1415822_at   | -8.2  | Stmn1                       | stathmin 1                                                                                                   |
| 1441137_at   | -8.3  | Kdelr1                      | KDEL (Lys-Asp-Glu-Leu) endoplasmic reticulum protein retention receptor 1                                    |
| 1419292_at   | -8.4  | Acox2                       | acyl-Coenzyme A oxidase 2, branched chain                                                                    |
| 1422432_at   | -8.5  | Rnf26                       | ring finger protein 26                                                                                       |
| 1453304_s_at | -8.6  | Khdrbs1                     | KH domain containing, RNA binding, signal transduction associated 1                                          |
| 1455719_at   | -8.6  | Xdh                         | xanthine dehydrogenase                                                                                       |
|              |       | 100041163 /// 100042634 /// |                                                                                                              |
|              |       | EG385336 /// EG664936 ///   |                                                                                                              |
|              |       | EG666548 ///                |                                                                                                              |
|              |       | ENSMUSG00000063556 ///      | predicted gene, 100041163 /// predicted gene, 100042634 /// predicted gene, EG385336 /// predicted gene,     |
|              |       | ENSMUSG00000071532 ///      | EG664936 /// predicted gene, EG666548 /// predicted gene, ENSMUSG00000063556 /// predicted gene,             |
|              |       | LOC100042058 ///            | ENSMUSG00000071532 /// similar to ribosomal protein L23a /// similar to ribosomal protein L23a /// ribosomal |
| 1433465_a_at | -8.6  | LOC100046821 /// Rpl23a     | protein L23a                                                                                                 |
| 1434053_x_at | -8.6  | Sulf2                       | sulfatase 2                                                                                                  |
| 1451643_a_at | -8.6  | Mga                         | MAX gene associated                                                                                          |
| 1452861_at   | -8.7  | Dlc1                        | deleted in liver cancer 1                                                                                    |
| 1429246_a_at | -8.7  | Pgd                         | phosphogluconate dehydrogenase                                                                               |
| 1423924_s_at | -8.8  | Mapre2                      | microtubule-associated protein, RP/EB family, member 2                                                       |
| 1456393_at   | -8.8  | Rnpep1                      | arginyl aminopeptidase (aminopeptidase B)-like 1                                                             |
| 1459823_at   | -9.0  | A230067G21Rik               | RIKEN cDNA A230067G21 gene                                                                                   |
| 1426499_at   | -9.2  | Ptms                        | parathyromosin                                                                                               |
| 1455642_a_at | -9.3  | Slc25a30                    | solute carrier family 25, member 30                                                                          |
| 1437760_at   | -9.8  | Prps2                       | phosphoribosyl pyrophosphate synthetase 2                                                                    |
| 1423771_at   | -10.0 | Wsb1                        | WD repeat and SOCS box-containing 1                                                                          |
| 1435972_at   | -10.0 | Crot                        | carnitine O-octanoyltransferase                                                                              |
| 1438116_x_at | -10.0 | Frat2                       | frequently rearranged in advanced T-cell lymphomas 2                                                         |
| 1416066_at   | -10.0 | Txn1                        | thioredoxin 1                                                                                                |
| 1450062_a_at | -10.1 | 6820431F20Rik               | RIKEN cDNA 6820431F20 gene                                                                                   |
| 1438195_at   | -10.5 | Prr8                        | proline rich 8                                                                                               |
| 1456312_x_at | -10.5 | Dnajc1                      | DnaJ (Hsp40) homolog, subfamily C, member 1                                                                  |
| 1424451_at   | -10.5 | Rbm39                       | RNA binding motif protein 39                                                                                 |
| 1434642_at   | -10.6 | Ube4b                       | ubiquitination factor E4B, UFD2 homolog (S. cerevisiae)                                                      |
| 1449147_at   | -10.7 | 1600027N09Rik               | RIKEN cDNA 1600027N09 gene                                                                                   |
| 1455972_x_at | -11.2 | Tm7sf3                      | transmembrane 7 superfamily member 3                                                                         |
| 1417220_at   | -12.3 | Ifitm2                      | interferon induced transmembrane protein 2                                                                   |
| 1443849_x_at | -12.8 | Paqr7                       | progesterone and adipoQ receptor family member VII                                                           |
| 1417732_at   | -13.0 | Aifm1                       | apoptosis-inducing factor, mitochondrion-associated 1                                                        |
| 1425789_s_at | -13.5 | Acsl5                       | acyl-CoA synthetase long-chain family member 5                                                               |
| 1436528_at   | -18.5 | Zdhhc20                     | zinc finger, DHHC domain containing 20                                                                       |
| 1455940_x_at | -19.9 | Cubn                        | cubilin (intrinsic factor-cobalamin receptor)                                                                |
| 1416326_at   | -70.6 | Nsmaf                       | neutral sphingomyelinase (N-SMase) activation associated factor                                              |

**Table S4. ChAG-associated signature response of mGEP cells: 695 transcripts that are differentially expressed upon infection with all 5 ChAG strains but not with the strain associated with normal gastric histology, or with heat-killed bacteria (fdr threshold 0.005).**

| Moe430_2<br>GeneChip<br>probeset | fold-change | gene symbol         | gene description                                                                                                        |
|----------------------------------|-------------|---------------------|-------------------------------------------------------------------------------------------------------------------------|
| 1419149_at                       | 24.3        | Serpine1            | serine (or cysteine) peptidase inhibitor, clade E, member 1                                                             |
| 1417256_at                       | 19.2        | Mmp13               | matrix metalloproteinase 13                                                                                             |
| 1457644_s_at                     | 19.1        | Cxcl1               | chemokine (C-X-C motif) ligand 1                                                                                        |
| 1420197_at                       | 16.1        | Gadd45b             | Growth arrest and DNA-damage-inducible 45 beta, mRNA (cDNA clone MGC:36156 IMAGE:5355150)                               |
| 1427381_at                       | 16.1        | Irg1                | immunoresponsive gene 1                                                                                                 |
|                                  |             | Casp4 ///           |                                                                                                                         |
| 1449591_at                       | 14.4        | LOC100044206        | caspase 4, apoptosis-related cysteine peptidase /// hypothetical protein LOC100044206                                   |
| 1418536_at                       | 13.4        | H2-Q7               | histocompatibility 2, Q region locus 7                                                                                  |
| 1425412_at                       | 11.3        | Nlrp3               | NLR family, pyrin domain containing 3                                                                                   |
| 1423413_at                       | 10.7        | Ndrp1               | N-myc downstream regulated gene 1                                                                                       |
| 1418829_a_at                     | 9.8         | Eno2                | enolase 2, gamma neuronal                                                                                               |
| 1419675_at                       | 9.6         | Ngf                 | nerve growth factor                                                                                                     |
| 1418936_at                       | 9.4         | Maff                | v-maf musculoaponeurotic fibrosarcoma oncogene family, protein F (avian)                                                |
| 1433453_a_at                     | 9.1         | Abtb2               | ankyrin repeat and BTB (POZ) domain containing 2                                                                        |
| 1448485_at                       | 8.8         | Ggt1                | gamma-glutamyltransferase 1                                                                                             |
| 1448610_a_at                     | 8.3         | Sod2                | superoxide dismutase 2, mitochondrial                                                                                   |
| 1447612_x_at                     | 8.1         | Jmjd3               | jumonji domain containing 3                                                                                             |
| 1418188_a_at                     | 8.0         | Malat1              | metastasis associated lung adenocarcinoma transcript 1 (non-coding RNA)                                                 |
| 1417813_at                       | 7.8         | Ikbke               | inhibitor of kappaB kinase epsilon                                                                                      |
| 1421207_at                       | 7.7         | Lif                 | leukemia inhibitory factor                                                                                              |
| 1456014_s_at                     | 7.5         | Fermt3              | fermitin family homolog 3 (Drosophila)                                                                                  |
| 1438855_x_at                     | 7.4         | Tnfrsf2             | tumor necrosis factor, alpha-induced protein 2                                                                          |
| 1458802_at                       | 7.4         | Hivep3              | human immunodeficiency virus type I enhancer binding protein 3                                                          |
| 1423904_a_at                     | 6.8         | Pvr                 | poliovirus receptor                                                                                                     |
| 1438157_s_at                     | 6.8         | Nfkbia              | nuclear factor of kappa light polypeptide gene enhancer in B-cells inhibitor, alpha                                     |
| 1422053_at                       | 6.6         | Inhba               | inhibin beta-A                                                                                                          |
| 1418105_at                       | 6.4         | Stmn4               | stathmin-like 4                                                                                                         |
| 1439787_at                       | 6.4         | P2rx7               | purinergic receptor P2X, ligand-gated ion channel, 7                                                                    |
| 1454976_at                       | 6.3         | Sod2                | superoxide dismutase 2, mitochondrial                                                                                   |
| 1420515_a_at                     | 5.8         | Pglyrp2             | peptidoglycan recognition protein 2                                                                                     |
| 1420330_at                       | 5.8         | Clec4e              | C-type lectin domain family 4, member e                                                                                 |
| 1419853_a_at                     | 5.7         | P2rx7               | purinergic receptor P2X, ligand-gated ion channel, 7                                                                    |
| 1420450_at                       | 5.6         | Mmp10               | matrix metalloproteinase 10                                                                                             |
| 1418133_at                       | 5.6         | Bcl3                | B-cell leukemia/lymphoma 3                                                                                              |
| 1460602_at                       | 5.5         | Dlc1                | deleted in liver cancer 1                                                                                               |
|                                  |             | Hrh1 ///            |                                                                                                                         |
| 1438494_at                       | 5.4         | LOC100041871        | histamine receptor H1 /// similar to histamine receptor H1                                                              |
|                                  |             | Atp13a4 ///         |                                                                                                                         |
| 1438707_at                       | 5.4         | LOC637970           | ATPase type 13A4 /// similar to type V P-type ATPase isoform 4                                                          |
| 1451160_s_at                     | 5.4         | Pvr                 | poliovirus receptor                                                                                                     |
| 1422748_at                       | 5.4         | Zeb2                | zinc finger E-box binding homeobox 2                                                                                    |
| 1436173_at                       | 5.2         | Dlc1                | deleted in liver cancer 1                                                                                               |
| 1435540_at                       | 5.2         | Irgq                | immunity-related GTPase family, Q                                                                                       |
| 1435108_at                       | 4.9         | Arhgap22            | Rho GTPase activating protein 22                                                                                        |
| 1420382_at                       | 4.9         | Apob48r             | apolipoprotein B48 receptor                                                                                             |
| 1424959_at                       | 4.9         | Anxa13              | annexin A13                                                                                                             |
| 1434350_at                       | 4.8         | Axud1               | AXIN1 up-regulated 1                                                                                                    |
| 1460336_at                       | 4.8         | Ppargc1a            | peroxisome proliferative activated receptor, gamma, coactivator 1 alpha                                                 |
| 1432059_x_at                     | 4.7         | 5031425E22Rik       | RIKEN cDNA 5031425E22 gene                                                                                              |
| 1440346_at                       | 4.7         | Jmjd3               | Jumonji domain containing 3, mRNA (cDNA clone IMAGE:1378940)                                                            |
| 1447870_x_at                     | 4.6         | 1110002E22Rik       | RIKEN cDNA 1110002E22 gene                                                                                              |
| 1428909_at                       | 4.6         | A130040M12Rik       | RIKEN cDNA A130040M12 gene                                                                                              |
| 1443883_at                       | 4.5         | Sys1                | SYS1 Golgi-localized integral membrane protein homolog (S. cerevisiae)                                                  |
| 1437247_at                       | 4.5         | Fosl2 /// LOC634417 | fos-like antigen 2 /// similar to fos-like antigen 2                                                                    |
| 1426464_at                       | 4.5         | Nr1d1               | nuclear receptor subfamily 1, group D, member 1                                                                         |
| 1455029_at                       | 4.4         | Kif21a              | kinesin family member 21A                                                                                               |
|                                  |             | Fbxl10 ///          |                                                                                                                         |
|                                  |             | OTTMUSG00000006     |                                                                                                                         |
| 1459861_s_at                     | 4.4         | 609                 | F-box and leucine-rich repeat protein 10 /// predicted gene, OTTMUSG00000006609                                         |
| 1424408_at                       | 4.4         | Lims2               | LIM and senescent cell antigen like domains 2                                                                           |
|                                  |             | 1200015M12Rik ///   |                                                                                                                         |
|                                  |             | 1200016E24Rik ///   |                                                                                                                         |
|                                  |             | A130040M12Rik ///   |                                                                                                                         |
| 1435137_s_at                     | 4.3         | E430024C06Rik       | RIKEN cDNA 1200015M12 gene /// RIKEN cDNA 1200016E24 gene /// RIKEN cDNA A130040M12 gene /// RIKEN cDNA E430024C06 gene |
| 1445843_at                       | 4.2         | Chd2                | chromodomain helicase DNA binding protein 2                                                                             |
| 1421756_a_at                     | 4.2         | Gpr19               | G protein-coupled receptor 19                                                                                           |
| 1449851_at                       | 4.2         | Per1                | period homolog 1 (Drosophila)                                                                                           |
| 1454865_at                       | 4.2         | Slc9a8              | solute carrier family 9 (sodium/hydrogen exchanger), member 8                                                           |
| 1422028_a_at                     | 4.2         | Ets1                | E26 avian leukemia oncogene 1, 5' domain                                                                                |

|              |     |                     |                                                                                                          |
|--------------|-----|---------------------|----------------------------------------------------------------------------------------------------------|
| 1426526_s_at | 4.1 | Ovgp1               | oviductal glycoprotein 1                                                                                 |
| 1449702_at   | 4.1 | Zfand2a             | zinc finger, AN1-type domain 2A                                                                          |
| 1438796_at   | 4.1 | Nr4a3               | nuclear receptor subfamily 4, group A, member 3                                                          |
| 1428691_at   | 4.1 | Chd2                | chromodomain helicase DNA binding protein 2                                                              |
| 1418714_at   | 4.1 | Dusp8               | dual specificity phosphatase 8                                                                           |
| 1429588_at   | 4.1 | 2810474O19Rik       | RIKEN cDNA 2810474O19 gene                                                                               |
| 1420591_at   | 4.1 | Gpr84               | G protein-coupled receptor 84                                                                            |
| 1415941_s_at | 4.0 | Zfand2a             | zinc finger, AN1-type domain 2A                                                                          |
| 1434054_at   | 3.9 | Mafig               | v-maf musculoaponeurotic fibrosarcoma oncogene family, protein G (avian)                                 |
| 1435458_at   | 3.9 | Pim1                | proviral integration site 1                                                                              |
| 1427160_at   | 3.9 | Pcf11               | cleavage and polyadenylation factor subunit homolog (S. cerevisiae)                                      |
| 1437100_x_at | 3.9 | Pim3                | proviral integration site 3                                                                              |
| 1450430_at   | 3.9 | Mrc1                | mannose receptor, C type 1                                                                               |
| 1450414_at   | 3.9 | Pdgfb               | platelet derived growth factor, B polypeptide                                                            |
| 1448026_at   | 3.9 | Chd7                | chromodomain helicase DNA binding protein 7                                                              |
| 1453228_at   | 3.8 | Stx11               | syntaxin 11                                                                                              |
| 1422473_at   | 3.7 | Pde4b               | phosphodiesterase 4B, cAMP specific                                                                      |
| 1435470_at   | 3.6 | LOC547150           | similar to p47 protein                                                                                   |
| 1454102_at   | 3.6 | 5031425E22Rik       | RIKEN cDNA 5031425E22 gene                                                                               |
| 1452397_at   | 3.6 | 2810474O19Rik       | RIKEN cDNA 2810474O19 gene                                                                               |
| 1453181_x_at | 3.6 | Plscr1              | phospholipid scramblase 1                                                                                |
| 1455266_at   | 3.6 | Kif5c               | kinesin family member 5C                                                                                 |
| 1417612_at   | 3.6 | Ier5                | immediate early response 5                                                                               |
| 1455166_at   | 3.5 | Arl5b               | ADP-ribosylation factor-like 5B                                                                          |
| 1436094_at   | 3.5 | Vgf                 | VEGF nerve growth factor inducible                                                                       |
| 1434774_at   | 3.5 | Rhbdf2              | rhuboid 5 homolog 2 (Drosophila)                                                                         |
| 1419029_at   | 3.5 | Ero1l               | ERO1-like (S. cerevisiae)                                                                                |
| 1422474_at   | 3.5 | Pde4b               | phosphodiesterase 4B, cAMP specific                                                                      |
| 1441737_s_at | 3.5 | Rassf1              | Ras association (RalGDS/AF-6) domain family member 1                                                     |
| 1452214_at   | 3.5 | Skil                | SKI-like                                                                                                 |
| 1416600_a_at | 3.5 | Rcan1               | regulator of calcineurin 1                                                                               |
| 1437111_at   | 3.4 | Zc3h12c             | zinc finger CCCH type containing 12C                                                                     |
| 1425020_at   | 3.4 | EG621629 /// Ubxn2a | predicted gene, EG621629 /// UBX domain protein 2A                                                       |
| 1425319_s_at | 3.4 | Snmp48              | small nuclear ribonucleoprotein 48 (U11/U12)                                                             |
| 1416224_at   | 3.4 | Zbtb17              | zinc finger and BTB domain containing 17                                                                 |
| 1449168_a_at | 3.4 | Akap2 /// Palm2 /// | A kinase (PRKA) anchor protein 2 /// paralemmin 2 /// Palm2-Akap2 protein                                |
| 1421031_a_at | 3.4 | 2310016C08Rik       | RIKEN cDNA 2310016C08 gene                                                                               |
| 1425536_at   | 3.4 | Stx3                | syntaxin 3                                                                                               |
| 1426726_at   | 3.4 | LOC677319 ///       |                                                                                                          |
| 1448596_at   | 3.4 | Ppp1r10             | similar to protein phosphatase 1, regulatory subunit 10 /// protein phosphatase 1, regulatory subunit 10 |
| 1418808_at   | 3.4 | Slc6a8              | solute carrier family 6 (neurotransmitter transporter, creatine), member 8                               |
| 1419766_at   | 3.4 | Rdh5                | retinol dehydrogenase 5                                                                                  |
| 1420618_at   | 3.4 | Sik1                | salt inducible kinase 1                                                                                  |
| 1427364_a_at | 3.3 | Cpeb4               | cytoplasmic polyadenylation element binding protein 4                                                    |
| 1427143_at   | 3.3 | Odc1                | ornithine decarboxylase, structural 1                                                                    |
| 1447923_at   | 3.3 | Jarid1b             | jumonji, AT rich interactive domain 1B (Rbp2 like)                                                       |
| 1426700_a_at | 3.3 | 1810026B05Rik       | PREDICTED: Mus musculus RIKEN cDNA 1810026B05 gene, transcript variant 2 (1810026B05Rik), mRNA           |
| 1439488_at   | 3.2 | Usp52               | ubiquitin specific peptidase 52                                                                          |
| 1427005_at   | 3.2 | Dot1l               | DOT1-like, histone H3 methyltransferase (S. cerevisiae)                                                  |
| 1434405_at   | 3.2 | Plk2                | polo-like kinase 2 (Drosophila)                                                                          |
| 1418189_s_at | 3.2 | Fnip1               | folliculin interacting protein 1                                                                         |
| 1418203_at   | 3.2 | Malat1              | metastasis associated lung adenocarcinoma transcript 1 (non-coding RNA)                                  |
| 1421365_at   | 3.2 | Pmaip1              | phorbol-12-myristate-13-acetate-induced protein 1                                                        |
| 1449164_at   | 3.1 | Fst                 | folliculin                                                                                               |
| 1447685_x_at | 3.1 | Cd68                | CD68 antigen                                                                                             |
| 1418835_at   | 3.1 | Ets2                | E26 avian leukemia oncogene 2, 3' domain                                                                 |
| 1427988_s_at | 3.1 | Phlda1              | pleckstrin homology-like domain, family A, member 1                                                      |
| 1423173_at   | 3.1 | Safb2               | scaffold attachment factor B2                                                                            |
| 1433963_a_at | 3.1 | Napb                | N-ethylmaleimide sensitive fusion protein attachment protein beta                                        |
| 1418422_at   | 3.1 | Fermt3              | fermitin family homolog 3 (Drosophila)                                                                   |
| 1451123_at   | 3.0 | Serpib9g            | serine (or cysteine) peptidase inhibitor, clade B, member 9g                                             |
| 1435055_a_at | 3.0 | C330016O10Rik       | RIKEN cDNA C330016O10 gene                                                                               |
| 1419203_at   | 3.0 | EG545878 /// Tom1   | predicted gene, EG545878 /// target of myb1 homolog (chicken)                                            |
| 1419427_at   | 3.0 | Gtf3a               | gene trap locus F3a                                                                                      |
| 1428982_at   | 3.0 | Csf3                | colony stimulating factor 3 (granulocyte)                                                                |
| 1456699_s_at | 3.0 | Atad2b              | ATPase family, AAA domain containing 2B                                                                  |
| 1441107_at   | 3.0 | Ythdc1              | YTH domain containing 1                                                                                  |
| 1424384_a_at | 3.0 | Dmrt2               | doublesex and mab-3 related transcription factor like family A2                                          |
| 1424861_at   | 2.9 | Znrf1               | zinc and ring finger 1                                                                                   |
| 1430353_at   | 2.9 | D930016D06Rik       | RIKEN cDNA D930016D06 gene                                                                               |
| 1457268_at   | 2.9 | Glis3               | GLIS family zinc finger 3                                                                                |
| 1452406_x_at | 2.9 | Dot1l               | DOT1-like, histone H3 methyltransferase (S. cerevisiae)                                                  |
| 1427410_at   | 2.9 | Erdr1               | erythroid differentiation regulator 1                                                                    |
|              | 2.9 | Dleu2               | deleted in lymphocytic leukemia, 2                                                                       |

|              |     |                    |                                                                                                                |
|--------------|-----|--------------------|----------------------------------------------------------------------------------------------------------------|
| 1434184_s_at | 2.9 | Map4k4             | mitogen-activated protein kinase kinase kinase kinase 4                                                        |
| 1422931_at   | 2.9 | Fosl2              | fos-like antigen 2                                                                                             |
| 1449603_at   | 2.9 | AI594671           | expressed sequence AI594671                                                                                    |
| 1425241_a_at | 2.9 | Wsb1               | WD repeat and SOCS box-containing 1                                                                            |
| 1448239_at   | 2.9 | Hmox1              | heme oxygenase (decycling) 1                                                                                   |
| 1439221_s_at | 2.9 | Cd40               | CD40 antigen                                                                                                   |
| 1427521_a_at | 2.9 | 9930023K05Rik      | RIKEN cDNA 9930023K05 gene                                                                                     |
| 1435402_at   | 2.8 | Gramd1b            | GRAM domain containing 1B                                                                                      |
| 1454929_s_at | 2.8 | Safb               | scaffold attachment factor B                                                                                   |
| 1453285_at   | 2.8 | Tmem88             | transmembrane protein 88                                                                                       |
| 1427047_at   | 2.8 | Nup188             | nucleoporin 188                                                                                                |
| 1438676_at   | 2.8 | Mpa2l              | macrophage activation 2 like                                                                                   |
| 1429262_at   | 2.8 | Rassf6             | Ras association (RalGDS/AF-6) domain family member 6                                                           |
| 1449173_at   | 2.8 | Mpp2               | membrane protein, palmitoylated 2 (MAGUK p55 subfamily member 2)                                               |
| 1436549_a_at | 2.8 | Hnrnpa1            | heterogeneous nuclear ribonucleoprotein A1                                                                     |
| 1434830_at   | 2.8 | Mxd1               | MAX dimerization protein 1                                                                                     |
|              |     | Cntf /// Zfp91 /// | ciliary neurotrophic factor /// zinc finger protein 91 /// zinc finger protein 91, ciliary neurotrophic factor |
| 1422033_a_at | 2.8 | Zfp91-cntf         | transcription unit                                                                                             |
| 1453294_at   | 2.8 | 1700012B15Rik      | RIKEN cDNA 1700012B15 gene                                                                                     |
| 1435597_at   | 2.8 | Atad5              | ATPase family, AAA domain containing 5                                                                         |
| 1422864_at   | 2.7 | Runx1              | runt related transcription factor 1                                                                            |
| 1440789_at   | 2.7 | Neo1               | neogenin                                                                                                       |
| 1449234_at   | 2.7 | Car15              | carbonic anhydrase 15                                                                                          |
| 1432103_a_at | 2.7 | Sh3gl3             | SH3-domain GRB2-like 3                                                                                         |
| 1421499_a_at | 2.7 | Ptpn14             | protein tyrosine phosphatase, non-receptor type 14                                                             |
| 1439892_at   | 2.7 | Brsk1              | BR serine/threonine kinase 1                                                                                   |
| 1418540_a_at | 2.7 | Ptpre              | protein tyrosine phosphatase, receptor type, E                                                                 |
| 1455046_a_at | 2.7 | Pogz               | pogo transposable element with ZNF domain                                                                      |
| 1448263_a_at | 2.7 | Cndp2              | CNDP dipeptidase 2 (metallopeptidase M20 family)                                                               |
| 1453101_at   | 2.7 | Klhl25             | kelch-like 25 (Drosophila)                                                                                     |
| 1434726_at   | 2.7 | Tmem146            | transmembrane protein 146                                                                                      |
| 1427283_at   | 2.6 | Mll1               | myeloid/lymphoid or mixed-lineage leukemia 1                                                                   |
| 1432001_at   | 2.6 | Zmynd17            | zinc finger, MYND domain containing 17                                                                         |
| 1429556_at   | 2.6 | 2610024B07Rik      | RIKEN cDNA 2610024B07 gene                                                                                     |
|              |     | EG627245 ///       |                                                                                                                |
|              |     | EG666231 ///       |                                                                                                                |
|              |     | EG668343 ///       | predicted gene, EG627245 /// predicted gene, EG666231 /// predicted gene, EG668343 /// similar to              |
| 1438761_a_at | 2.6 | LOC677259 /// Odc1 | Ornithine decarboxylase (ODC) /// ornithine decarboxylase, structural 1                                        |
| 1454655_at   | 2.6 | Dgkd               | diacylglycerol kinase, delta                                                                                   |
| 1418322_at   | 2.6 | Crem               | cAMP responsive element modulator                                                                              |
| 1427128_at   | 2.6 | Ptpn23             | protein tyrosine phosphatase, non-receptor type 23                                                             |
| 1435062_at   | 2.6 | 1500001A10Rik      | RIKEN cDNA 1500001A10 gene                                                                                     |
| 1449473_s_at | 2.6 | Cd40               | CD40 antigen                                                                                                   |
| 1424892_at   | 2.6 | Zkscan5            | zinc finger with KRAB and SCAN domains 5                                                                       |
| 1419241_a_at | 2.6 | Aire               | autoimmune regulator (autoimmune polyendocrinopathy candidiasis ectodermal dystrophy)                          |
| 1421045_at   | 2.5 | Mrc2               | mannose receptor, C type 2                                                                                     |
| 1460556_at   | 2.5 | Micall1            | microtubule associated monooxygenase, calponin and LIM domain containing -like 1                               |
| 1434687_at   | 2.5 | C730026J16         | hypothetical protein C730026J16                                                                                |
| 1418872_at   | 2.5 | Abcb1b             | ATP-binding cassette, sub-family B (MDR/TAP), member 1B                                                        |
| 1435091_at   | 2.5 | Zfp568             | zinc finger protein 568                                                                                        |
| 1426725_s_at | 2.5 | Ets1               | E26 avian leukemia oncogene 1, 5' domain                                                                       |
| 1426528_at   | 2.5 | Nrp2 /// Pard3b    | neuropilin 2 /// par-3 partitioning defective 3 homolog B (C. elegans)                                         |
| 1435249_at   | 2.4 | Btaf1              | BTAf1 RNA polymerase II, B-TFIIID transcription factor-associated, (Mot1 homolog, S. cerevisiae)               |
| 1451485_at   | 2.4 | 3300001P08Rik      | RIKEN cDNA 3300001P08 gene                                                                                     |
| 1424393_s_at | 2.4 | Adhfe1             | alcohol dehydrogenase, iron containing, 1                                                                      |
| 1451496_at   | 2.4 | Mtss1              | metastasis suppressor 1                                                                                        |
| 1426806_at   | 2.4 | Obfc2a             | oligonucleotide/oligosaccharide-binding fold containing 2A                                                     |
|              |     | Centb1 ///         |                                                                                                                |
| 1434873_a_at | 2.4 | LOC100045877       | centaurin, beta 1 /// similar to Centaurin, beta 1                                                             |
| 1438684_at   | 2.4 | Nuak1              | NUAK family, SNF1-like kinase, 1                                                                               |
| 1416225_at   | 2.4 | Adh1               | alcohol dehydrogenase 1 (class I)                                                                              |
| 1421446_at   | 2.4 | Prkcc              | protein kinase C, gamma                                                                                        |
| 1455104_at   | 2.3 | Mxd1               | MAX dimerization protein 1                                                                                     |
| 1449217_at   | 2.3 | Casp8ap2           | caspase 8 associated protein 2                                                                                 |
| 1454923_at   | 2.3 | Iws1               | IWS1 homolog (S. cerevisiae)                                                                                   |
| 1435341_at   | 2.3 | Ppig               | peptidyl-prolyl isomerase G (cyclophilin G)                                                                    |
| 1420361_at   | 2.3 | Slc11a1            | solute carrier family 11 (proton-coupled divalent metal ion transporters), member 1                            |
| 1434746_at   | 2.3 | Mga                | MAX gene associated                                                                                            |
| 1416274_at   | 2.3 | Ctns               | cystinosis, nephropathic                                                                                       |
| 1418305_s_at | 2.3 | Gar1               | GAR1 ribonucleoprotein homolog (yeast)                                                                         |
| 1448135_at   | 2.3 | Atf4               | activating transcription factor 4                                                                              |
| 1419380_at   | 2.3 | Zfp423             | zinc finger protein 423                                                                                        |
| 1442038_at   | 2.3 | Rbm26              | RNA binding motif protein 26                                                                                   |
| 1434832_at   | 2.3 | Foxo3              | forkhead box O3                                                                                                |
| 1429907_at   | 2.3 | 1700094D03Rik      | RIKEN cDNA 1700094D03 gene                                                                                     |
| 1455241_at   | 2.3 | BC037703           | cDNA sequence BC037703                                                                                         |
| 1455308_at   | 2.2 | Ano6               | anoctamin 6                                                                                                    |

|              |     |                      |                                                                                                      |
|--------------|-----|----------------------|------------------------------------------------------------------------------------------------------|
| 1420331_at   | 2.2 | Clec4e               | C-type lectin domain family 4, member e                                                              |
| 1438405_at   | 2.2 | Fgf7                 | fibroblast growth factor 7                                                                           |
| 1426361_at   | 2.2 | Zc3h11a              | zinc finger CCCH type containing 11A                                                                 |
| 1460315_s_at | 2.2 | Tbk1                 | TANK-binding kinase 1                                                                                |
|              |     | LOC100048538 ///     |                                                                                                      |
| 1440686_at   | 2.2 | Prss27               | similar to protease, serine 27 /// protease, serine 27                                               |
| 1429400_at   | 2.2 | Clcn5                | chloride channel 5                                                                                   |
| 1417249_at   | 2.2 | Polm                 | polymerase (DNA directed), mu                                                                        |
|              |     | LOC638050 ///        |                                                                                                      |
| 1455187_at   | 2.2 | Zbtb40               | similar to zinc finger and BTB domain containing 40 /// zinc finger and BTB domain containing 40     |
| 1456865_x_at | 2.2 | Rrs1                 | RRS1 ribosome biogenesis regulator homolog (S. cerevisiae)                                           |
| 1416419_s_at | 2.2 | Gabarapl1            | gamma-aminobutyric acid (GABA(A)) receptor-associated protein-like 1                                 |
| 1438967_x_at | 2.2 | Amhr2                | anti-Mullerian hormone type 2 receptor                                                               |
| 1452257_at   | 2.2 | Bdh1                 | 3-hydroxybutyrate dehydrogenase, type 1                                                              |
| 1450711_at   | 2.2 | Brd4                 | bromodomain containing 4                                                                             |
| 1434513_at   | 2.2 | Atp13a3              | ATPase type 13A3                                                                                     |
| 1424632_a_at | 2.2 | Rev3l                | REV3-like, catalytic subunit of DNA polymerase zeta RAD54 like (S. cerevisiae)                       |
| 1435007_s_at | 2.2 | AI132487             | expressed sequence AI132487                                                                          |
| 1455239_at   | 2.2 | 6330512M04Rik        | RIKEN cDNA 6330512M04 gene                                                                           |
| 1434092_at   | 2.2 | Atg9b                | ATG9 autophagy related 9 homolog B (S. cerevisiae)                                                   |
| 1432129_a_at | 2.2 | Prrx1                | paired related homeobox 1                                                                            |
| 1453775_at   | 2.2 | 4921505C17Rik        | RIKEN cDNA 4921505C17 gene                                                                           |
| 1435039_a_at | 2.1 | Pip5k1a              | phosphatidylinositol-4-phosphate 5-kinase, type 1 alpha                                              |
| 1440615_at   | 2.1 | Dusp16               | dual specificity phosphatase 16                                                                      |
| 1416187_s_at | 2.1 | Pnrc2                | proline-rich nuclear receptor coactivator 2                                                          |
| 1455269_a_at | 2.1 | Coro1a               | coronin, actin binding protein 1A                                                                    |
| 1435596_at   | 2.1 | Pion                 | pigeon homolog (Drosophila)                                                                          |
| 1417671_at   | 2.1 | Scly                 | selenocysteine lyase                                                                                 |
| 1456389_at   | 2.1 | Zeb2                 | zinc finger E-box binding homeobox 2                                                                 |
| 1453202_at   | 2.1 | E330016A19Rik        | RIKEN cDNA E330016A19 gene                                                                           |
| 1433523_at   | 2.1 | D930005D10Rik        | RIKEN cDNA D930005D10 gene                                                                           |
| 1427484_at   | 2.1 | Emi5                 | echinoderm microtubule associated protein like 5                                                     |
| 1454774_at   | 2.1 | Zfp445               | zinc finger protein 445                                                                              |
|              |     |                      | hect (homologous to the E6-AP (UBE3A) carboxyl terminus) domain and RCC1 (CHC1)-like domain (RLD) 2  |
| 1444228_s_at | 2.1 | Herc2                |                                                                                                      |
| 1437635_at   | 2.1 | Dcbld2               | discoidin, CUB and LCCL domain containing 2                                                          |
| 1436651_at   | 2.1 | Prdm11               | PR domain containing 11                                                                              |
| 1420394_s_at | 2.0 | Gp49a /// Liltrb4    | glycoprotein 49 A /// leukocyte immunoglobulin-like receptor, subfamily B, member 4                  |
| 1437851_x_at | 2.0 | Rnps1                | ribonucleic acid binding protein S1                                                                  |
| 1455309_at   | 2.0 | Ano6                 | anoctamin 6                                                                                          |
| 1455430_at   | 2.0 | Prr8                 | proline rich 8                                                                                       |
| 1453038_at   | 2.0 | 4930422G04Rik        | RIKEN cDNA 4930422G04 gene                                                                           |
|              |     | Atp6v0c /// Atp6v0c- | ATPase, H+ transporting, lysosomal V0 subunit C /// ATPase, H+ transporting, lysosomal V0 subunit C, |
| 1435732_x_at | 2.0 | ps2                  | pseudogene 2                                                                                         |
| 1416072_at   | 2.0 | Cd34                 | CD34 antigen                                                                                         |
| 1419354_at   | 2.0 | Klf7                 | Kruppel-like factor 7 (ubiquitous)                                                                   |
| 1444226_at   | 2.0 | Foxo3                | forkhead box O3                                                                                      |
| 1457473_at   | 2.0 | Chd1                 | chromodomain helicase DNA binding protein 1                                                          |
| 1425125_at   | 2.0 | Oit3                 | oncogene induced transcript 3                                                                        |
| 1417964_at   | 2.0 | Ap3d1                | adaptor-related protein complex 3, delta 1 subunit                                                   |
| 1456422_at   | 2.0 | Dennd5b              | DENN/MADD domain containing 5B                                                                       |
| 1449061_a_at | 2.0 | Prim1                | DNA primase, p49 subunit                                                                             |
| 1420296_at   | 2.0 | Clcn5                | Chloride channel 5, mRNA (cDNA clone MGC:35965 IMAGE:3989812)                                        |
|              |     | Atp6v0c /// Atp6v0c- | ATPase, H+ transporting, lysosomal V0 subunit C /// ATPase, H+ transporting, lysosomal V0 subunit C, |
| 1438925_x_at | 2.0 | ps2                  | pseudogene 2                                                                                         |
| 1448681_at   | 2.0 | Il15ra               | interleukin 15 receptor, alpha chain                                                                 |
| 1423799_at   | 2.0 | Eif1                 | eukaryotic translation initiation factor 1                                                           |
| 1421219_at   | 2.0 | Ttl3                 | tubulin tyrosine ligase-like family, member 3                                                        |
| 1422469_at   | 1.9 | Tbk1                 | TANK-binding kinase 1                                                                                |
| 1455295_at   | 1.9 | Slc38a7              | solute carrier family 38, member 7                                                                   |
| 1419400_at   | 1.9 | Mtp                  | microsomal triglyceride transfer protein                                                             |
| 1455110_at   | 1.9 | Gabpb2               | GA repeat binding protein, beta 2                                                                    |
| 1440868_at   | 1.9 | Gabpb2               | GA repeat binding protein, beta 2                                                                    |
| 1443954_at   | 1.9 | Rad18                | RAD18 homolog (S. cerevisiae), mRNA (cDNA clone MGC:19000 IMAGE:4014013)                             |
| 1440645_at   | 1.9 | BB114814             | expressed sequence BB114814                                                                          |
| 1448838_at   | 1.9 | Topors               | topoisomerase I binding, arginine/serine-rich                                                        |
| 1423309_at   | 1.9 | Tgoln1               | trans-golgi network protein                                                                          |
| 1445576_at   | 1.9 | Rsph10b2             | radial spoke head 10 homolog B (Chlamydomonas)                                                       |
| 1455549_at   | 1.9 | Sestd1               | SEC14 and spectrin domains 1                                                                         |
| 1416303_at   | 1.9 | Litaf                | LPS-induced TN factor                                                                                |
| 1417022_at   | 1.9 | Slc7a3               | solute carrier family 7 (cationic amino acid transporter, y+ system), member 3                       |
| 1427285_s_at | 1.9 | Malat1               | metastasis associated lung adenocarcinoma transcript 1 (non-coding RNA)                              |
| 1455765_a_at | 1.9 | Abcc8                | ATP-binding cassette, sub-family C (CFTR/MRP), member 8                                              |
| 1436604_at   | 1.9 | Ttl3                 | tubulin tyrosine ligase-like family, member 3                                                        |
| 1457262_at   | 1.9 | Smg1                 | SMG1 homolog, phosphatidylinositol 3-kinase-related kinase (C. elegans)                              |
| 1433599_at   | 1.8 | Baz1a                | bromodomain adjacent to zinc finger domain 1A                                                        |
| 1439983_a_at | 1.8 | Accn3                | amiloride-sensitive cation channel 3                                                                 |

|              |     |                     |                                                                                                                                                                               |
|--------------|-----|---------------------|-------------------------------------------------------------------------------------------------------------------------------------------------------------------------------|
| 1429124_s_at | 1.8 | Rexo1               | REX1, RNA exonuclease 1 homolog (S. cerevisiae)                                                                                                                               |
| 1449705_x_at | 1.8 | Mcm3                | similar to DNA replication licensing factor MCM3 (DNA polymerase alpha holoenzyme-associated protein P1) (P1-MCM3) /// minichromosome maintenance deficient 3 (S. cerevisiae) |
| 1451225_at   | 1.8 | Ptpn11              | protein tyrosine phosphatase, non-receptor type 11                                                                                                                            |
| 1439501_at   | 1.8 | Cbar1               | calcium binding atopy-related autoantigen 1                                                                                                                                   |
| 1455096_at   | 1.8 | Flrt2               | fibronectin leucine rich transmembrane protein 2                                                                                                                              |
| 1436885_a_at | 1.8 | Cherp               | calcium homeostasis endoplasmic reticulum protein                                                                                                                             |
| 1423798_a_at | 1.8 | Eif1                | eukaryotic translation initiation factor 1                                                                                                                                    |
| 1424788_at   | 1.8 | Kri1                | KRI1 homolog (S. cerevisiae)                                                                                                                                                  |
| 1443664_s_at | 1.8 | Cd164I2             | CD164 sialomucin-like 2                                                                                                                                                       |
| 1424645_at   | 1.8 | Tnrc6c              | trinucleotide repeat containing 6C                                                                                                                                            |
| 1437980_at   | 1.8 | 9130230N09Rik       | RIKEN cDNA 9130230N09 gene                                                                                                                                                    |
| 1437984_x_at | 1.8 | Bat1a               | HLA-B-associated transcript 1A                                                                                                                                                |
| 1427970_at   | 1.8 | Zfp689              | zinc finger protein 689                                                                                                                                                       |
| 1442992_at   | 1.8 | 130004C03           | hypothetical LOC403343                                                                                                                                                        |
| 1429085_at   | 1.8 | Vezf1               | vascular endothelial zinc finger 1                                                                                                                                            |
| 1436174_at   | 1.7 | Atad2               | ATPase family, AAA domain containing 2                                                                                                                                        |
| 1434005_at   | 1.7 | Rbms1               | RNA binding motif, single stranded interacting protein 1                                                                                                                      |
| 1437646_at   | 1.7 | LOC631806 /// Znrf3 | similar to Goliath homolog precursor (Ring finger protein 130) (R-goliath) /// zinc and ring finger 3                                                                         |
| 1433944_at   | 1.7 | Hectd2              | HECT domain containing 2                                                                                                                                                      |
| 1433517_at   | 1.7 | Myeov2              | myeloma overexpressed 2                                                                                                                                                       |
| 1443531_at   | 1.7 | A930005I04Rik       | RIKEN cDNA A930005I04 gene, mRNA (cDNA clone MGC:151305 IMAGE:40126247)                                                                                                       |
| 1432356_at   | 1.7 | 1700056N10Rik       | RIKEN cDNA 1700056N10 gene                                                                                                                                                    |
| 1460597_at   | 1.7 | Asx2                | additional sex combs like 2 (Drosophila)                                                                                                                                      |
| 1460318_at   | 1.7 | Csrp3               | cysteine and glycine-rich protein 3                                                                                                                                           |
| 1458685_at   | 1.7 | Garnl1              | GTPase activating RANGAP domain-like 1                                                                                                                                        |
| 1446337_at   | 1.7 | Htt                 | huntingtin                                                                                                                                                                    |
| 1434824_at   | 1.7 | Baz1b               | bromodomain adjacent to zinc finger domain, 1B                                                                                                                                |
| 1458163_at   | 1.7 | BC066028            | cDNA sequence BC066028                                                                                                                                                        |
| 1434753_at   | 1.7 | Nfrkb               | nuclear factor related to kappa B binding protein                                                                                                                             |
| 1459765_s_at | 1.7 | Sf1                 | splicing factor 1                                                                                                                                                             |
| 1455389_s_at | 1.7 | 2310051F07Rik       | RIKEN cDNA 2310051F07 gene                                                                                                                                                    |
| 1459622_at   | 1.7 | Gm22                | gene model 22, (NCBI)                                                                                                                                                         |
| 1441216_at   | 1.7 | St3gal1             | ST3 beta-galactoside alpha-2,3-sialyltransferase 1                                                                                                                            |
| 1455261_at   | 1.7 | Luc7l               | Luc7 homolog (S. cerevisiae)-like                                                                                                                                             |
| 1455943_at   | 1.7 | Zfp451              | zinc finger protein 451                                                                                                                                                       |
| 1450314_at   | 1.7 | Dqx1                | DEAQ RNA-dependent ATPase                                                                                                                                                     |
| 1419920_s_at | 1.7 | Usp7                | ubiquitin specific peptidase 7                                                                                                                                                |
| 1430135_at   | 1.7 | Dnase2a             | deoxyribonuclease II alpha                                                                                                                                                    |
| 1455668_at   | 1.6 | Whsc11l             | Wolf-Hirschhorn syndrome candidate 1-like 1 (human)                                                                                                                           |
| 1427411_s_at | 1.6 | Dleu2               | deleted in lymphocytic leukemia, 2                                                                                                                                            |
| 1455148_at   | 1.6 | Tmem130             | transmembrane protein 130                                                                                                                                                     |
| 1449158_at   | 1.6 | Kcnk2               | potassium channel, subfamily K, member 2                                                                                                                                      |
| 1456844_at   | 1.6 | Camk2d              | calcium/calmodulin-dependent protein kinase II, delta                                                                                                                         |
| 1427534_at   | 1.6 | 4930535I16Rik       | RIKEN cDNA 4930535I16 gene                                                                                                                                                    |
| 1458087_at   | 1.6 | Stac3               | SH3 and cysteine rich domain 3                                                                                                                                                |
| 1454944_at   | 1.6 | Hic2                | hypermethylated in cancer 2                                                                                                                                                   |
| 1459815_at   | 1.6 | LOC100045751 ///    |                                                                                                                                                                               |
| 1452614_at   | 1.5 | Zmynd12             | similar to zinc finger, MYND domain containing 12 /// zinc finger, MYND domain containing 12                                                                                  |
| 1430594_at   | 1.5 | Bcl2l15             | BCL2-like 15                                                                                                                                                                  |
| 1439620_at   | 1.5 | Rab11fip1           | RAB11 family interacting protein 1 (class I)                                                                                                                                  |
| 1452243_at   | 1.5 | Car13               | carbonic anhydrase 13                                                                                                                                                         |
| 1441409_at   | 1.5 | Kcnj14              | potassium inwardly-rectifying channel, subfamily J, member 14                                                                                                                 |
| 1437779_at   | 1.5 | BC030307            | cDNA sequence BC030307                                                                                                                                                        |
| 1437304_at   | 1.5 | Foxh1               | forkhead box H1                                                                                                                                                               |
| 1433910_at   | 1.5 | Cblb                | Casitas B-lineage lymphoma b                                                                                                                                                  |
| 1433450_at   | 1.5 | Zcchc6              | zinc finger, CCHC domain containing 6                                                                                                                                         |
| 1450611_at   | 1.5 | Cdk5r1              | cyclin-dependent kinase 5, regulatory subunit 1 (p35)                                                                                                                         |
| 1460042_at   | 1.5 | Orm3                | orosomucoid 3                                                                                                                                                                 |
| 1455675_a_at | 1.5 | Slc23a3             | solute carrier family 23 (nucleobase transporters), member 3                                                                                                                  |
| 1455502_at   | 1.5 | Tial1               | Tia1 cytotoxic granule-associated RNA binding protein-like 1                                                                                                                  |
| 1436454_x_at | 1.5 | Madd                | MAP-kinase activating death domain                                                                                                                                            |
| 1455676_x_at | 1.5 | Fen1                | flap structure specific endonuclease 1                                                                                                                                        |
| 1453334_at   | 1.5 | Tial1               | Tia1 cytotoxic granule-associated RNA binding protein-like 1                                                                                                                  |
| 1446509_at   | 1.5 | B230216N24Rik       | RIKEN cDNA B230216N24 gene                                                                                                                                                    |
| 1444419_at   | 1.4 | Smox                | spermium oxidase                                                                                                                                                              |
| 1433933_s_at | 1.4 | LOC100048394 ///    |                                                                                                                                                                               |
| 1441039_at   | 1.4 | Prcp                | hypothetical protein LOC100048394 /// prolylcarboxypeptidase (angiotensinase C)                                                                                               |
| 1456052_at   | 1.4 | Slco2b1             | solute carrier organic anion transporter family, member 2b1                                                                                                                   |
| 1454200_at   | 1.4 | 4930532J02Rik       | RIKEN cDNA 4930532J02 gene                                                                                                                                                    |
| 1439618_at   | 1.3 | Cdkl3               | cyclin-dependent kinase-like 3                                                                                                                                                |
| 1431180_at   | 1.3 | Zeb2                | zinc finger E-box binding homeobox 2                                                                                                                                          |
| 1448641_at   | 1.3 | Pde10a              | phosphodiesterase 10A                                                                                                                                                         |
| 1428611_at   | 1.3 | Zfp433              | RIKEN cDNA 1700123A16 gene                                                                                                                                                    |
| 1447997_s_at | 1.2 | Mbtd1               | mbt domain containing 1                                                                                                                                                       |
|              |     | Atg7                | autophagy-related 7 (yeast)                                                                                                                                                   |
|              |     | Timm8a2             | translocase of inner mitochondrial membrane 8 homolog a2 (yeast)                                                                                                              |



|              |      |                        |                                                                                                            |
|--------------|------|------------------------|------------------------------------------------------------------------------------------------------------|
|              |      | LOC100046668 ///       |                                                                                                            |
|              |      | OTTMUSG00000022        | similar to yeast ribosomal protein S28 homologue /// predicted gene, OTTMUSG00000022083 ///                |
| 1460175_at   | -1.3 | 083 /// Rps23          | ribosomal protein S23                                                                                      |
| 1456497_x_at | -1.3 | Rps10                  | ribosomal protein S10                                                                                      |
| 1438723_a_at | -1.3 | Rps10                  | ribosomal protein S10                                                                                      |
| 1456308_x_at | -1.4 | Trim28                 | tripartite motif-containing 28                                                                             |
|              |      | ENSMUSG000000045       |                                                                                                            |
| 1423455_at   | -1.4 | 799 /// Ptma           | predicted gene, ENSMUSG000000045799 /// prothymosin alpha                                                  |
| 1424000_a_at | -1.4 | Rps11                  | ribosomal protein S11                                                                                      |
| 1416054_at   | -1.4 | Rps5                   | ribosomal protein S5                                                                                       |
| 1435151_a_at | -1.4 | Rps3                   | ribosomal protein S3                                                                                       |
| 1415701_x_at | -1.4 | Rpl23                  | ribosomal protein L23                                                                                      |
| 1452167_at   | -1.4 | 2810407C02Rik          | RIKEN cDNA 2810407C02 gene                                                                                 |
| 1434588_x_at | -1.4 | EG620313 /// Tbca      | predicted gene, EG620313 /// tubulin cofactor a                                                            |
| 1453467_s_at | -1.4 | Rps15a                 | ribosomal protein S15a                                                                                     |
| 1439443_x_at | -1.4 | Tkt                    | transketolase                                                                                              |
| 1439069_a_at | -1.4 | 4933439C20Rik          | RIKEN cDNA 4933439C20 gene                                                                                 |
| 1415979_x_at | -1.4 | Rpl7                   | ribosomal protein L7                                                                                       |
| 1455578_x_at | -1.5 | Rpl41                  | ribosomal protein L41                                                                                      |
| 1416089_at   | -1.5 | Rps15                  | ribosomal protein S15                                                                                      |
|              |      | EG667682 ///           |                                                                                                            |
|              |      | ENSMUSG000000066       | predicted gene, EG667682 /// predicted gene, ENSMUSG000000066956 /// ERO1-like (S. cerevisiae) ///         |
| 1460008_x_at | -1.5 | 956 /// Ero1 /// Rpl31 | ribosomal protein L31                                                                                      |
|              |      | 100041509 ///          |                                                                                                            |
|              |      | ENSMUSG000000058       |                                                                                                            |
|              |      | 443 ///                |                                                                                                            |
|              |      | LOC100048223 ///       |                                                                                                            |
|              |      | LOC100048462 ///       |                                                                                                            |
|              |      | OTTMUSG000000015       | predicted gene, 100041509 /// predicted gene, ENSMUSG000000058443 /// similar to QM protein ///            |
| 1448157_s_at | -1.5 | 005 /// Rpl10          | similar to QM protein /// predicted gene, OTTMUSG00000015005 /// ribosomal protein 10                      |
| 1423429_at   | -1.5 | Rhox5                  | reproductive homeobox 5                                                                                    |
| 1416300_a_at | -1.5 | Slc25a3                | solute carrier family 25 (mitochondrial carrier, phosphate carrier), member 3                              |
| 1419441_at   | -1.5 | Rplp0                  | ribosomal protein, large, P0                                                                               |
| 1452984_at   | -1.5 | LOC100044842           | similar to cyclin fold protein 1                                                                           |
| 1422623_x_at | -1.5 | Rpl41                  | ribosomal protein L41                                                                                      |
|              |      | 100041163 ///          |                                                                                                            |
|              |      | 100041478 ///          |                                                                                                            |
|              |      | ENSMUSG000000063       |                                                                                                            |
|              |      | 556 ///                |                                                                                                            |
|              |      | ENSMUSG000000071       |                                                                                                            |
|              |      | 532 ///                | predicted gene, 100041163 /// predicted gene, 100041478 /// predicted gene, ENSMUSG000000063556            |
|              |      | LOC100046821 ///       | /// predicted gene, ENSMUSG000000071532 /// similar to ribosomal protein L23a /// ribosomal protein        |
| 1426660_x_at | -1.5 | Rpl23a                 | L23a                                                                                                       |
|              |      | EG665562 ///           |                                                                                                            |
|              |      | EG667682 ///           |                                                                                                            |
|              |      | EG668850 ///           |                                                                                                            |
|              |      | ENSMUSG000000066       |                                                                                                            |
|              |      | 956 /// Ero1 ///       |                                                                                                            |
|              |      | LOC638399 ///          |                                                                                                            |
|              |      | LOC673582 ///          | predicted gene, EG665562 /// predicted gene, EG667682 /// predicted gene, EG668850 /// predicted           |
|              |      | LOC675018 ///          | gene, ENSMUSG000000066956 /// ERO1-like (S. cerevisiae) /// similar to ribosomal protein L31 ///           |
|              |      | OTTMUSG000000009       | similar to ribosomal protein L31 /// similar to ribosomal protein L31 /// predicted gene,                  |
| 1436924_x_at | -1.5 | 823 /// Rpl31          | OTTMUSG00000009823 /// ribosomal protein L31                                                               |
| 1460287_at   | -1.5 | Timp2                  | tissue inhibitor of metalloproteinase 2                                                                    |
|              |      | LOC100039355 ///       |                                                                                                            |
| 1416404_s_at | -1.5 | Rps16                  | similar to Rps16 protein /// ribosomal protein S16                                                         |
| 1448242_at   | -1.5 | Sec61a1                | Sec61 alpha 1 subunit (S. cerevisiae)                                                                      |
| 1433822_x_at | -1.6 | Anapc5                 | anaphase-promoting complex subunit 5                                                                       |
|              |      | EG665562 ///           |                                                                                                            |
|              |      | EG667682 ///           |                                                                                                            |
|              |      | ENSMUSG000000066       |                                                                                                            |
|              |      | 956 /// LOC638399 ///  | predicted gene, EG665562 /// predicted gene, EG667682 /// predicted gene, ENSMUSG000000066956              |
|              |      | LOC673582 ///          | /// similar to ribosomal protein L31 /// similar to ribosomal protein L31 /// similar to ribosomal protein |
| 1428212_x_at | -1.6 | LOC675018 /// Rpl31    | L31 /// ribosomal protein L31                                                                              |
| 1416415_a_at | -1.6 | H2afz                  | H2A histone family, member Z                                                                               |
| 1436883_at   | -1.6 | Mbtps2                 | membrane-bound transcription factor peptidase, site 2                                                      |
| 1433645_at   | -1.6 | Slc44a1                | solute carrier family 44, member 1                                                                         |
| 1448252_a_at | -1.6 | Eef1b2                 | eukaryotic translation elongation factor 1 beta 2                                                          |
| 1417451_a_at | -1.6 | Ppia                   | peptidylprolyl isomerase A                                                                                 |
|              |      | LOC674712 ///          |                                                                                                            |
| 1441866_s_at | -1.6 | Ptdss1                 | similar to phosphatidylserine synthase 1 /// phosphatidylserine synthase 1                                 |
|              |      | Dnajc10 ///            | DnaJ (Hsp40) homolog, subfamily C, member 10 /// similar to DnaJ (Hsp40) homolog, subfamily C,             |
| 1426904_s_at | -1.6 | LOC100047007           | member 10                                                                                                  |
| 1448322_a_at | -1.6 | Cox4i1                 | cytochrome c oxidase subunit IV isoform 1                                                                  |

|              |      |                                                                          |                                                                                                                                                                   |
|--------------|------|--------------------------------------------------------------------------|-------------------------------------------------------------------------------------------------------------------------------------------------------------------|
| 1415833_x_at | -1.6 | OTTMUSG00000016<br>246 /// Rps29                                         | predicted gene, OTTMUSG00000016246 /// ribosomal protein S29<br>potassium voltage gated channel, Shab-related subfamily, member 1 /// protein kinase C and casein |
| 1417810_a_at | -1.6 | Kcnb1 /// Pacsin2<br>LOC100044627 ///                                    | kinase substrate in neurons 2                                                                                                                                     |
| 1460680_a_at | -1.6 | Rpl23                                                                    | similar to HL23 ribosomal protein /// ribosomal protein L23                                                                                                       |
| 1417323_at   | -1.6 | Psrc1                                                                    | proline/serine-rich coiled-coil 1                                                                                                                                 |
| 1435910_at   | -1.6 | Fads3                                                                    | fatty acid desaturase 3                                                                                                                                           |
| 1420880_a_at | -1.7 | Ywhab                                                                    | tyrosine 3-monooxygenase/tryptophan 5-monooxygenase activation protein, beta polypeptide                                                                          |
| 1453034_at   | -1.7 | Zfp251                                                                   | zinc finger protein 251                                                                                                                                           |
| 1436079_s_at | -1.7 | Vapb                                                                     | vesicle-associated membrane protein, associated protein B and C                                                                                                   |
| 1437389_x_at | -1.7 | Khdrbs1<br>100041163 ///<br>100041478 ///<br>ENSMUSG000000063<br>556 /// | KH domain containing, RNA binding, signal transduction associated 1                                                                                               |
| 1426659_a_at | -1.7 | LOC100046821 ///                                                         | predicted gene, 100041163 /// predicted gene, 100041478 /// predicted gene, ENSMUSG000000063556                                                                   |
| 1415821_at   | -1.7 | Rpl23a                                                                   | /// similar to ribosomal protein L23a /// ribosomal protein L23a                                                                                                  |
| 1456128_at   | -1.7 | Nptn                                                                     | neuroplastin                                                                                                                                                      |
| 1448504_a_at | -1.7 | Atp5g2                                                                   | ATP synthase, H+ transporting, mitochondrial F0 complex, subunit c (subunit 9), isoform 2                                                                         |
| 1453729_a_at | -1.7 | Cbx3 /// LOC633016                                                       | chromobox homolog 3 (Drosophila HP1 gamma) /// similar to chromobox homolog 3                                                                                     |
| 1430288_x_at | -1.7 | Rpl37                                                                    | ribosomal protein L37                                                                                                                                             |
| 1428152_a_at | -1.7 | Rps21                                                                    | ribosomal protein S21                                                                                                                                             |
| 1434731_x_at | -1.7 | Rpl18a                                                                   | ribosomal protein L18A                                                                                                                                            |
| 1451002_at   | -1.7 | Prdx1                                                                    | peroxiredoxin 1                                                                                                                                                   |
| 1452830_s_at | -1.7 | Aco2                                                                     | aconitase 2, mitochondrial                                                                                                                                        |
| 1416539_at   | -1.7 | Cad                                                                      | carbamoyl-phosphate synthetase 2, aspartate transcarbamylase, and dihydroorotase                                                                                  |
| 1428884_at   | -1.7 | Siae                                                                     | sialic acid acetyltransferase                                                                                                                                     |
|              |      | Tmem57                                                                   | transmembrane protein 57                                                                                                                                          |
|              |      | 4933439C20Rik ///                                                        | RIKEN cDNA 4933439C20 gene /// phosphatidylserine decarboxylase pseudogene ///                                                                                    |
| 1426387_x_at | -1.7 | LOC236604 /// Pisd                                                       | phosphatidylserine decarboxylase                                                                                                                                  |
| 1426809_at   | -1.8 | C430004E15Rik<br>100038991 ///<br>100043296 ///                          | RIKEN cDNA C430004E15 gene                                                                                                                                        |
| 1416243_a_at | -1.8 | ENSMUSG000000069                                                         | predicted gene, 100038991 /// predicted gene, 100043296 /// predicted gene,                                                                                       |
| 1439060_s_at | -1.8 | 439 /// Rpl35                                                            | ENSMUSG00000069439 /// ribosomal protein L35                                                                                                                      |
| 1415741_at   | -1.8 | Wipi1                                                                    | WD repeat domain, phosphoinositide interacting 1                                                                                                                  |
| 1416996_at   | -1.8 | Tmem165                                                                  | transmembrane protein 165                                                                                                                                         |
|              |      | Tbc1d8                                                                   | TBC1 domain family, member 8                                                                                                                                      |
|              |      | EG668144 ///                                                             |                                                                                                                                                                   |
|              |      | ENSMUSG000000062                                                         |                                                                                                                                                                   |
| 1422475_a_at | -1.8 | 611 /// Rps3a<br>100041163 ///                                           | predicted gene, EG668144 /// predicted gene, ENSMUSG000000062611 /// ribosomal protein S3a                                                                        |
|              |      | 100042634 ///                                                            |                                                                                                                                                                   |
|              |      | EG385336 ///                                                             |                                                                                                                                                                   |
|              |      | EG664936 ///                                                             |                                                                                                                                                                   |
|              |      | EG666548 ///                                                             |                                                                                                                                                                   |
|              |      | ENSMUSG000000063<br>556 ///                                              |                                                                                                                                                                   |
|              |      | ENSMUSG000000071<br>532 ///                                              |                                                                                                                                                                   |
|              |      | LOC100042058 ///                                                         | predicted gene, 100041163 /// predicted gene, 100042634 /// predicted gene, EG385336 /// predicted                                                                |
|              |      | LOC100046821 ///                                                         | gene, EG664936 /// predicted gene, EG666548 /// predicted gene, ENSMUSG000000063556 ///                                                                           |
| 1437975_a_at | -1.8 | Rpl23a                                                                   | predicted gene, ENSMUSG000000071532 /// similar to ribosomal protein L23a /// similar to ribosomal                                                                |
| 1416276_a_at | -1.8 | Rps4x                                                                    | protein L23a /// ribosomal protein L23a                                                                                                                           |
| 1448103_s_at | -1.8 | Nono                                                                     | ribosomal protein S4, X-linked                                                                                                                                    |
| 1435612_at   | -1.8 | Opcml                                                                    | non-POU-domain-containing, octamer binding protein                                                                                                                |
| 1426576_at   | -1.8 | Sgms1                                                                    | opioid binding protein/cell adhesion molecule-like                                                                                                                |
| 1416546_a_at | -1.8 | Rpl6                                                                     | sphingomyelin synthase 1                                                                                                                                          |
| 1424635_at   | -1.8 | Eef1a1                                                                   | ribosomal protein L6                                                                                                                                              |
| 1416961_at   | -1.8 | Bub1b                                                                    | eukaryotic translation elongation factor 1 alpha 1                                                                                                                |
| 1434091_at   | -1.8 | Faah                                                                     | budding uninhibited by benzimidazoles 1 homolog, beta (S. cerevisiae)                                                                                             |
| 1426680_at   | -1.8 | Sepr1                                                                    | fatty acid amide hydrolase                                                                                                                                        |
| 1437159_at   | -1.8 | Glb1                                                                     | selenoprotein N, 1                                                                                                                                                |
| 1436691_x_at | -1.8 | Prdx1                                                                    | galactosidase, beta 1                                                                                                                                             |
| 1455022_at   | -1.9 | Strn                                                                     | peroxiredoxin 1                                                                                                                                                   |
| 1417615_a_at | -1.9 | Rpl11                                                                    | striatin, calmodulin binding protein                                                                                                                              |
| 1449183_at   | -1.9 | Comt1                                                                    | ribosomal protein L11                                                                                                                                             |
| 1438159_x_at | -1.9 | Ndufv2                                                                   | catechol-O-methyltransferase 1                                                                                                                                    |
| 1456695_x_at | -1.9 | Anapc5                                                                   | NADH dehydrogenase (ubiquinone) flavoprotein 2                                                                                                                    |
| 1416105_at   | -1.9 | Nnt                                                                      | anaphase-promoting complex subunit 5                                                                                                                              |
| 1437807_x_at | -1.9 | Ctnna1                                                                   | nicotinamide nucleotide transhydrogenase                                                                                                                          |
| 1448449_at   | -1.9 | Ripk3                                                                    | catenin (cadherin associated protein), alpha 1                                                                                                                    |
| 1421870_at   | -1.9 | Trim44                                                                   | receptor-interacting serine-threonine kinase 3                                                                                                                    |
| 1423677_at   | -1.9 | Fkbp9                                                                    | tripartite motif-containing 44                                                                                                                                    |
| 1435880_at   | -1.9 | Ankrd50                                                                  | FK506 binding protein 9                                                                                                                                           |
|              |      |                                                                          | ankyrin repeat domain 50                                                                                                                                          |

|              |      |                  |                                                                                                      |
|--------------|------|------------------|------------------------------------------------------------------------------------------------------|
| 1451516_at   | -1.9 | Rheb1            | Ras homolog enriched in brain like 1                                                                 |
| 1426342_at   | -1.9 | Stt3b            | STT3, subunit of the oligosaccharyltransferase complex, homolog B (S. cerevisiae)                    |
| 1435178_x_at | -1.9 | Anapc5           | anaphase-promoting complex subunit 5                                                                 |
| 1436499_at   | -1.9 | Sgms1            | sphingomyelin synthase 1                                                                             |
| 1424052_at   | -1.9 | Thap4            | THAP domain containing 4                                                                             |
| 1417842_at   | -1.9 | Caml             | calcium modulating ligand                                                                            |
| 1460387_a_at | -1.9 | Siae             | sialic acid acetyltransferase                                                                        |
| 1418101_a_at | -1.9 | Rtn3             | reticulum 3                                                                                          |
|              |      | Gm1604A ///      |                                                                                                      |
|              |      | Gm1604b ///      |                                                                                                      |
|              |      | Rnaset2a ///     |                                                                                                      |
| 1452734_at   | -1.9 | Rnaset2b         | gene model 1604A, (NCBI) /// gene model 1604B, (NCBI) /// ribonuclease T2A /// ribonuclease T2B      |
| 1455164_at   | -2.0 | Cdgap            | CDC42 GTPase-activating protein                                                                      |
| 1424005_at   | -2.0 | B230219D22Rik    | RIKEN cDNA B230219D22 gene                                                                           |
| 1428600_at   | -2.0 | Nin              | ninein                                                                                               |
| 1424987_at   | -2.0 | 5430435G22Rik    | RIKEN cDNA 5430435G22 gene                                                                           |
| 1422780_at   | -2.0 | Pxmp4            | peroxisomal membrane protein 4                                                                       |
| 1416058_s_at | -2.0 | Atp5c1           | ATP synthase, H+ transporting, mitochondrial F1 complex, gamma polypeptide 1                         |
| 1423680_at   | -2.0 | Fads1            | fatty acid desaturase 1                                                                              |
| 1421375_a_at | -2.0 | S100a6           | S100 calcium binding protein A6 (calyculin)                                                          |
| 1456475_s_at | -2.0 | Prkar2b          | protein kinase, cAMP dependent regulatory, type II beta                                              |
| 1423030_at   | -2.0 | Vcp              | valosin containing protein                                                                           |
| 1450686_at   | -2.0 | Pon2             | paraoxonase 2                                                                                        |
| 1423071_x_at | -2.0 | 6720475J19Rik    | RIKEN cDNA 6720475J19 gene                                                                           |
| 1451015_at   | -2.0 | Tkt              | transketolase                                                                                        |
| 1416836_at   | -2.0 | Lrp10            | low-density lipoprotein receptor-related protein 10                                                  |
| 1429019_s_at | -2.0 | Pon2             | paraoxonase 2                                                                                        |
| 1418066_at   | -2.0 | Cfl2             | cofilin 2, muscle                                                                                    |
| 1452147_at   | -2.0 | Sec24c           | Sec24 related gene family, member C (S. cerevisiae)                                                  |
| 1434897_a_at | -2.0 | Slc25a4          | solute carrier family 25 (mitochondrial carrier, adenine nucleotide translocator), member 4          |
| 1455350_at   | -2.0 | Tmem62           | transmembrane protein 62                                                                             |
| 1435074_at   | -2.0 | Tmem106b         | transmembrane protein 106B                                                                           |
| 1433805_at   | -2.0 | Jak1             | Janus kinase 1                                                                                       |
| 1435157_at   | -2.0 | Hook3            | hook homolog 3 (Drosophila)                                                                          |
| 1448526_at   | -2.0 | Kpnb1            | karyopherin (importin) beta 1                                                                        |
| 1416119_at   | -2.0 | Txn1             | thioredoxin 1                                                                                        |
| 1448149_at   | -2.1 | Ctnna1           | catenin (cadherin associated protein), alpha 1                                                       |
|              |      | ENSMUSG00000050  |                                                                                                      |
|              |      | 347 ///          |                                                                                                      |
|              |      | LOC100048142 /// |                                                                                                      |
| 1437185_s_at | -2.1 | Tmsb10           | predicted gene, ENSMUSG00000050347 /// similar to thymosin, beta 10 /// thymosin, beta 10            |
| 1422747_at   | -2.1 | Chek2            | CHK2 checkpoint homolog (S. pombe)                                                                   |
| 1429304_at   | -2.1 | Ankrd10          | ankyrin repeat domain 10                                                                             |
| 1428270_at   | -2.1 | Glt8d1           | glycosyltransferase 8 domain containing 1                                                            |
| 1415751_at   | -2.1 | Hp1bp3           | heterochromatin protein 1, binding protein 3                                                         |
| 1428382_at   | -2.1 | Smarcc2          | SWI/SNF related, matrix associated, actin dependent regulator of chromatin, subfamily c, member 2    |
| 1428103_at   | -2.1 | Adam10           | a disintegrin and metallopeptidase domain 10                                                         |
| 1426350_at   | -2.1 | Mgat2            | mannoside acetylglucosaminyltransferase 2                                                            |
| 1434383_at   | -2.1 | Pja2             | praja 2, RING-H2 motif containing                                                                    |
| 1428535_at   | -2.1 | 9430020K01Rik    | RIKEN cDNA 9430020K01 gene                                                                           |
| 1448619_at   | -2.1 | Dhcr7            | 7-dehydrocholesterol reductase                                                                       |
| 1434478_at   | -2.1 | Heca             | headcase homolog (Drosophila)                                                                        |
| 1448474_at   | -2.1 | Nek7             | NIMA (never in mitosis gene a)-related expressed kinase 7                                            |
| 1418506_a_at | -2.1 | Prdx2            | peroxiredoxin 2                                                                                      |
| 1417028_a_at | -2.2 | Trim2            | tripartite motif-containing 2                                                                        |
| 1439184_s_at | -2.2 | Txndc17          | thioredoxin domain containing 17                                                                     |
|              |      | EG629732 ///     |                                                                                                      |
|              |      | LOC100042180 /// |                                                                                                      |
|              |      | LOC100048094 /// |                                                                                                      |
|              |      | OTTMUSG000000000 |                                                                                                      |
|              |      | 623 ///          |                                                                                                      |
|              |      | OTTMUSG000000016 |                                                                                                      |
|              |      | 616 ///          | predicted gene, EG629732 /// ribosomal protein S8 pseudogene /// similar to ribosomal protein S8 /// |
|              |      | OTTMUSG000000022 | predicted gene, OTTMUSG00000000623 /// predicted gene, OTTMUSG00000016616 /// predicted              |
| 1436760_a_at | -2.2 | 847 /// Rps8     | gene, OTTMUSG000000022847 /// ribosomal protein S8                                                   |
| 1434395_at   | -2.2 | Man1a2           | mannosidase, alpha, class 1A, member 2                                                               |
| 1417090_at   | -2.2 | Rcn1             | reticulocalbin 1                                                                                     |
| 1433779_at   | -2.2 | Casc4            | cancer susceptibility candidate 4                                                                    |
| 1455419_at   | -2.2 | D630045J12Rik    | RIKEN cDNA D630045J12 gene                                                                           |
| 1427048_at   | -2.2 | Smo              | smoothened homolog (Drosophila)                                                                      |
| 1428412_at   | -2.2 | Tm9sf3           | transmembrane 9 superfamily member 3                                                                 |
| 1448661_at   | -2.2 | Plcb3            | phospholipase C, beta 3                                                                              |
| 1417012_at   | -2.2 | Sdc2             | syndecan 2                                                                                           |
| 1443978_at   | -2.2 | Ankle1           | ankyrin repeat and LEM domain containing 1                                                           |
| 1417893_at   | -2.2 | Sfxn3            | sideroflexin 3                                                                                       |

|              |      |                  |                                                                               |
|--------------|------|------------------|-------------------------------------------------------------------------------|
|              |      | 100041509 ///    |                                                                               |
|              |      | EG234703 ///     |                                                                               |
|              |      | EG665071 ///     |                                                                               |
|              |      | ENSMUSG00000058  |                                                                               |
|              |      | 443 ///          |                                                                               |
|              |      | LOC100048223 /// |                                                                               |
|              |      | LOC100048462 /// | predicted gene, 100041509 ///                                                 |
|              |      | OTTMUSG00000015  | predicted gene, EG234703 ///                                                  |
| 1415942_at   | -2.2 | 005 ///          | predicted gene, EG665071 ///                                                  |
|              |      | Rpl10            | predicted gene, ENSMUSG00000058443 ///                                        |
|              |      | 100042986 ///    | similar to QM protein ///                                                     |
|              |      | OTTMUSG00000015  | similar to QM protein ///                                                     |
|              |      | 874 ///          | predicted gene, OTTMUSG00000015874 ///                                        |
| 1460543_x_at | -2.2 | Rpl37a           | ribosomal protein L37a                                                        |
| 1454649_at   | -2.3 | Srd5a1           | steroid 5 alpha-reductase 1                                                   |
| 1433908_a_at | -2.3 | Cttn             | cortactin                                                                     |
| 1424906_at   | -2.3 | Pq1c3            | PQ loop repeat containing                                                     |
| 1452155_a_at | -2.3 | Ddx17            | DEAD (Asp-Glu-Ala-Asp) box polypeptide 17                                     |
| 1435666_at   | -2.3 | Mast3            | microtubule associated serine/threonine kinase 3                              |
| 1448486_at   | -2.3 | Mut              | methylmalonyl-Coenzyme A mutase                                               |
| 1418000_a_at | -2.3 | Itm2b            | integral membrane protein 2B                                                  |
| 1424438_a_at | -2.3 | Leptot           | leptin receptor overlapping transcript                                        |
|              |      | LOC674712 ///    |                                                                               |
| 1416372_at   | -2.3 | Ptdss1           | similar to phosphatidylserine synthase 1 ///                                  |
| 1428875_at   | -2.3 | Golim4           | phosphatidylserine synthase 1                                                 |
| 1451068_s_at | -2.3 | Rps25            | golgi integral membrane protein 4                                             |
| 1451175_at   | -2.3 | Spcs3            | ribosomal protein S25                                                         |
| 1428853_at   | -2.3 | Ptch1            | signal peptidase complex subunit 3 homolog (S. cerevisiae)                    |
| 1425985_s_at | -2.3 | Masp1            | patched homolog 1                                                             |
| 1433887_at   | -2.3 | Dnajc3           | mannan-binding lectin serine peptidase 1                                      |
| 1420895_at   | -2.3 | Tgfr1            | DnaJ (Hsp40) homolog, subfamily C, member 3                                   |
| 1451359_at   | -2.3 | Lpcat1           | transforming growth factor, beta receptor I                                   |
| 1437290_at   | -2.4 | Impad1           | lysophosphatidylcholine acyltransferase 1                                     |
| 1421824_at   | -2.4 | Bace1            | inositol monophosphatase domain containing 1                                  |
| 1418483_a_at | -2.4 | Ggta1            | beta-site APP cleaving enzyme 1                                               |
| 1429425_at   | -2.4 | Rnf139           | glycoprotein galactosyltransferase alpha 1, 3                                 |
| 1418238_at   | -2.4 | Ivd              | ring finger protein 139                                                       |
| 1432360_a_at | -2.4 | Tmtc4            | isovaleryl coenzyme A dehydrogenase                                           |
| 1423120_at   | -2.4 | Ide              | transmembrane and tetratricopeptide repeat containing 4                       |
| 1423846_x_at | -2.4 | Tuba1b           | insulin degrading enzyme                                                      |
| 1416440_at   | -2.4 | Cd164            | tubulin, alpha 1B                                                             |
| 1416664_at   | -2.4 | Cdc20            | CD164 antigen                                                                 |
| 1434891_at   | -2.4 | Ptgfrn           | cell division cycle 20 homolog (S. cerevisiae)                                |
| 1435737_a_at | -2.4 | Nde1             | prostaglandin F2 receptor negative regulator                                  |
| 1429896_at   | -2.4 | 5830408B19Rik    | nuclear distribution gene E homolog 1 (A nidulans)                            |
| 1415707_at   | -2.4 | Anapc2           | RIKEN cDNA 5830408B19 gene                                                    |
| 1450431_a_at | -2.5 | Nedd4            | anaphase promoting complex subunit 2                                          |
| 1438602_s_at | -2.5 | Masp1            | neural precursor cell expressed, developmentally down-regulated 4             |
| 1448253_at   | -2.5 | Glud1            | mannan-binding lectin serine peptidase 1                                      |
| 1454709_at   | -2.5 | Tmem64           | glutamate dehydrogenase 1                                                     |
| 1417404_at   | -2.5 | Elovl6           | transmembrane protein 64                                                      |
| 1438847_at   | -2.5 | Mxd3             | ELOVL family member 6, elongation of long chain fatty acids (yeast)           |
| 1428624_at   | -2.5 | 2810482107Rik    | Max dimerization protein 3                                                    |
| 1416750_at   | -2.5 | Sigmar1          | RIKEN cDNA 2810482107 gene                                                    |
| 1436747_at   | -2.5 | Fam100b          | sigma non-opioid intracellular receptor 1                                     |
| 1448592_at   | -2.5 | Crtap            | family with sequence similarity 100, member B                                 |
| 1448241_at   | -2.5 | Gm2a             | cartilage associated protein                                                  |
| 1415698_at   | -2.5 | Golm1            | GM2 ganglioside activator protein                                             |
| 1448647_at   | -2.5 | Man2a1           | golgi membrane protein 1                                                      |
| 1448960_at   | -2.6 | Cxxc5            | mannosidase 2, alpha 1                                                        |
| 1427177_at   | -2.6 | Fyco1            | CXXC finger 5                                                                 |
| 1438976_x_at | -2.6 | Mat2a            | FYVE and coiled-coil domain containing 1                                      |
| 1435395_s_at | -2.6 | Atp5j2           | methionine adenosyltransferase II, alpha                                      |
| 1449125_at   | -2.6 | Tnfrsf81         | ATP synthase, H+ transporting, mitochondrial F0 complex, subunit f, isoform 2 |
| 1448498_at   | -2.6 | Rps6ka4          | tumor necrosis factor, alpha-induced protein 8-like 1                         |
| 1429189_at   | -2.6 | Arsb             | ribosomal protein S6 kinase, polypeptide 4                                    |
| 1439815_at   | -2.6 | Heatr5b          | arylsulfatase B                                                               |
| 1419259_at   | -2.6 | Rsu1             | HEAT repeat containing 5B                                                     |
| 1417420_at   | -2.6 | Ccnd1            | Ras suppressor protein 1                                                      |
| 1423917_a_at | -2.6 | Cttn             | cyclin D1                                                                     |
| 1416536_at   | -2.6 | Mum1             | cortactin                                                                     |
| 1449303_at   | -2.6 | Sesn3            | melanoma associated antigen (mutated) 1                                       |
| 1435649_at   | -2.7 | Nexn             | Sestrin 3, mRNA (cDNA clone IMAGE:3481673)                                    |
| 1426015_s_at | -2.7 | Asph             | nexilin                                                                       |
| 1424707_at   | -2.7 | Tmed10           | aspartate-beta-hydroxylase                                                    |
| 1416364_at   | -2.7 | Hsp90ab1         | transmembrane emp24-like trafficking protein 10 (yeast)                       |
| 1453572_a_at | -2.7 | Plp2             | heat shock protein 90 alpha (cytosolic), class B member 1                     |
| 1424828_a_at | -2.7 | Fh1              | proteolipid protein 2                                                         |
|              |      |                  | fumarate hydratase 1                                                          |

|              |      |                    |                                                                                                                                         |
|--------------|------|--------------------|-----------------------------------------------------------------------------------------------------------------------------------------|
| 1430700_a_at | -2.7 | Pla2g7             | phospholipase A2, group VII (platelet-activating factor acetylhydrolase, plasma)                                                        |
| 1425506_at   | -2.7 | Mylk               | myosin, light polypeptide kinase                                                                                                        |
| 1434037_s_at | -2.7 | Kat2b              | K(lysine) acetyltransferase 2B                                                                                                          |
| 1422438_at   | -2.7 | Ephx1              | epoxide hydrolase 1, microsomal                                                                                                         |
| 1428647_at   | -2.7 | LOC676870 /// Pbx1 | region containing RIKEN cDNA 2310056B04 gene; pre B-cell leukemia transcription factor 1 /// pre B-cell leukemia transcription factor 1 |
| 1434123_at   | -2.7 | Fut11              | fucosyltransferase 11                                                                                                                   |
| 1436824_x_at | -2.7 | Rnf26              | ring finger protein 26                                                                                                                  |
| 1446618_at   | -2.7 | LOC432971          | hypothetical gene supported by AK038224                                                                                                 |
| 1429739_a_at | -2.7 | Patz1              | POZ (BTB) and AT hook containing zinc finger 1                                                                                          |
| 1435652_a_at | -2.7 | Gnai2              | guanine nucleotide binding protein (G protein), alpha inhibiting 2                                                                      |
| 1418318_at   | -2.7 | Rnf128             | ring finger protein 128                                                                                                                 |
| 1434518_at   | -2.8 | Phka2              | phosphorylase kinase alpha 2                                                                                                            |
| 1460732_a_at | -2.8 | Ppl                | periplakin                                                                                                                              |
|              |      | 100042986 ///      |                                                                                                                                         |
|              |      | OTTMUSG00000015    |                                                                                                                                         |
| 1416217_a_at | -2.8 | 874 /// Rpl37a     | predicted gene, 100042986 /// predicted gene, OTTMUSG00000015874 /// ribosomal protein L37a                                             |
| 1426690_a_at | -2.8 | Srebf1             | sterol regulatory element binding transcription factor 1                                                                                |
| 1435727_s_at | -2.8 | Lima1              | LIM domain and actin binding 1                                                                                                          |
| 1424093_x_at | -2.8 | Cd151              | CD151 antigen                                                                                                                           |
| 1450862_at   | -2.8 | Rad54l             | RAD54 like (S. cerevisiae)                                                                                                              |
| 1428431_at   | -2.8 | Zcchc24            | zinc finger, CCHC domain containing 24                                                                                                  |
| 1428432_at   | -2.8 | Zcchc24            | zinc finger, CCHC domain containing 24                                                                                                  |
| 1438055_at   | -2.8 | Rarres1            | retinoic acid receptor responder (tazarotene induced) 1                                                                                 |
| 1438200_at   | -2.8 | Sulf1              | sulfatase 1                                                                                                                             |
|              |      | 4933439C20Rik ///  |                                                                                                                                         |
|              |      | LOC236604 /// Pisd | RIKEN cDNA 4933439C20 gene /// phosphatidylserine decarboxylase pseudogene ///                                                          |
| 1436944_x_at | -2.9 | LOC236604 /// Pisd | phosphatidylserine decarboxylase                                                                                                        |
| 1450388_s_at | -2.9 | Twsg1              | twisted gastrulation homolog 1 (Drosophila)                                                                                             |
| 1460409_at   | -2.9 | Cpt1a              | carnitine palmitoyltransferase 1a, liver                                                                                                |
| 1416529_at   | -2.9 | Emp1               | epithelial membrane protein 1                                                                                                           |
| 1426778_at   | -2.9 | Dag1               | dystroglycan 1                                                                                                                          |
| 1416365_at   | -2.9 | Hsp90ab1           | heat shock protein 90 alpha (cytosolic), class B member 1                                                                               |
| 1431375_s_at | -2.9 | Parva              | parvin, alpha                                                                                                                           |
| 1454843_at   | -2.9 | Prps2              | phosphoribosyl pyrophosphate synthetase 2                                                                                               |
| 1449056_at   | -2.9 | E330009J07Rik      | RIKEN cDNA E330009J07 gene                                                                                                              |
| 1438634_x_at | -2.9 | Laspl              | LIM and SH3 protein 1                                                                                                                   |
| 1423667_at   | -2.9 | Mat2a              | methionine adenosyltransferase II, alpha                                                                                                |
| 1428891_at   | -3.0 | 9130213B05Rik      | RIKEN cDNA 9130213B05 gene                                                                                                              |
| 1417027_at   | -3.0 | Trim2              | tripartite motif-containing 2                                                                                                           |
| 1453634_a_at | -3.0 | Erp29              | endoplasmic reticulum protein 29                                                                                                        |
| 1416041_at   | -3.0 | Sgk1               | serum/glucocorticoid regulated kinase 1                                                                                                 |
| 1455481_at   | -3.0 | Ids                | iduronate 2-sulfatase                                                                                                                   |
| 1455789_x_at | -3.0 | Hspa8              | heat shock protein 8                                                                                                                    |
| 1421654_a_at | -3.0 | Lmna               | lamin A                                                                                                                                 |
| 1449147_at   | -3.1 | Chst1              | carbohydrate (keratan sulfate Gal-6) sulfotransferase 1                                                                                 |
| 1422445_at   | -3.1 | Itga6              | integrin alpha 6                                                                                                                        |
| 1416000_a_at | -3.1 | Prdx1              | peroxiredoxin 1                                                                                                                         |
| 1438386_x_at | -3.1 | Mat2a              | methionine adenosyltransferase II, alpha                                                                                                |
| 1437308_s_at | -3.1 | F2r                | coagulation factor II (thrombin) receptor                                                                                               |
| 1434642_at   | -3.1 | Hsd17b11           | hydroxysteroid (17-beta) dehydrogenase 11                                                                                               |
|              |      | 1190002N15Rik ///  |                                                                                                                                         |
| 1433582_at   | -3.1 | LOC100044725       | RIKEN cDNA 1190002N15 gene /// hypothetical protein LOC100044725                                                                        |
| 1415855_at   | -3.2 | Kitl               | kit ligand                                                                                                                              |
| 1455470_x_at | -3.2 | Laspl              | LIM and SH3 protein 1                                                                                                                   |
| 1450852_s_at | -3.2 | F2r                | coagulation factor II (thrombin) receptor                                                                                               |
| 1451339_at   | -3.2 | Suox               | sulfite oxidase                                                                                                                         |
| 1428789_at   | -3.2 | Ralgps2            | CDNA clone IMAGE:6828107                                                                                                                |
| 1434105_at   | -3.2 | Epm2aip1           | EPM2A (laforin) interacting protein 1                                                                                                   |
| 1454677_at   | -3.2 | Timp2              | tissue inhibitor of metalloproteinase 2                                                                                                 |
| 1423732_at   | -3.2 | Tram1              | translocating chain-associating membrane protein 1                                                                                      |
| 1422906_at   | -3.2 | Abcg2              | ATP-binding cassette, sub-family G (WHITE), member 2                                                                                    |
| 1428801_at   | -3.3 | Mgat3              | mannoside acetylglucosaminyltransferase 3                                                                                               |
| 1420836_at   | -3.3 | Slc25a30           | solute carrier family 25, member 30                                                                                                     |
| 1438630_x_at | -3.4 | Mat2a              | methionine adenosyltransferase II, alpha                                                                                                |
| 1449145_a_at | -3.4 | Cav1               | caveolin 1, caveolae protein                                                                                                            |
| 1448433_a_at | -3.4 | Pcolce             | procollagen C-endopeptidase enhancer protein                                                                                            |
| 1456292_a_at | -3.5 | Vim                | vimentin                                                                                                                                |
| 1453304_s_at | -3.5 | Ly6e               | lymphocyte antigen 6 complex, locus E                                                                                                   |
| 1416269_at   | -3.5 | Atp5j2             | ATP synthase, H+ transporting, mitochondrial F0 complex, subunit f, isoform 2                                                           |
| 1448354_at   | -3.5 | G6pdx              | glucose-6-phosphate dehydrogenase X-linked                                                                                              |
| 1417056_at   | -3.5 | Psme1              | proteasome (prosome, macropain) 28 subunit, alpha                                                                                       |
| 1429089_s_at | -3.5 | 2900026A02Rik      | RIKEN cDNA 2900026A02 gene                                                                                                              |
|              |      | LOC100046044 ///   |                                                                                                                                         |
| 1418157_at   | -3.5 | Nr2f1              | similar to COUP-TFI /// nuclear receptor subfamily 2, group F, member 1                                                                 |
| 1457446_at   | -3.5 | Opcml              | opioid binding protein/cell adhesion molecule-like                                                                                      |
| 1433576_at   | -3.6 | Mat2a              | methionine adenosyltransferase II, alpha                                                                                                |
| 1415984_at   | -3.6 | Acadm              | acyl-Coenzyme A dehydrogenase, medium chain                                                                                             |

|              |       |                   |                                                                                            |
|--------------|-------|-------------------|--------------------------------------------------------------------------------------------|
| 1428082_at   | -3.6  | Acsf5             | acyl-CoA synthetase long-chain family member 5                                             |
| 1452037_at   | -3.6  | Mgat2             | mannoside acetylglucosaminyltransferase 2                                                  |
| 1443832_s_at | -3.6  | Sdpr              | serum deprivation response                                                                 |
| 1448533_at   | -3.6  | Tbcb              | tubulin folding cofactor B                                                                 |
| 1416868_at   | -3.6  | Cdkn2c            | cyclin-dependent kinase inhibitor 2C (p18, inhibits CDK4)                                  |
| 1415770_at   | -3.7  | Wdr6              | WD repeat domain 6                                                                         |
| 1415818_at   | -3.7  | Anxa6             | annexin A6                                                                                 |
| 1423712_a_at | -3.7  | Qars              | glutamyl-tRNA synthetase                                                                   |
| 1433504_at   | -3.7  | Pygb              | brain glycogen phosphorylase                                                               |
| 1428795_at   | -3.7  | 1110021L09Rik     | RIKEN cDNA 1110021L09 gene                                                                 |
| 1433770_at   | -3.7  | Dpysl2            | dihydropyrimidinase-like 2                                                                 |
| 1424829_at   | -3.8  | A830007P12Rik     | RIKEN cDNA A830007P12 gene                                                                 |
| 1424157_at   | -3.8  | Ehd2              | EH-domain containing 2                                                                     |
| 1437760_at   | -3.8  | Galnt12           | UDP-N-acetyl-alpha-D-galactosamine:polypeptide N-acetylgalactosaminyltransferase 12        |
| 1423790_at   | -3.8  | Dap               | death-associated protein                                                                   |
| 1429390_at   | -3.8  | Acpl2             | acid phosphatase-like 2                                                                    |
| 1460173_at   | -3.9  | Lasp1             | LIM and SH3 protein 1                                                                      |
| 1416167_at   | -3.9  | Prdx4             | peroxiredoxin 4                                                                            |
|              |       | 1190002N15Rik /// |                                                                                            |
| 1433581_at   | -3.9  | LOC100044725      | RIKEN cDNA 1190002N15 gene /// hypothetical protein LOC100044725                           |
| 1436029_at   | -4.0  | Bicc1             | bicaudal C homolog 1 (Drosophila)                                                          |
| 1435972_at   | -4.1  | Cast              | calpastatin                                                                                |
| 1456735_x_at | -4.1  | Acpl2             | acid phosphatase-like 2                                                                    |
|              |       | LOC100044161 ///  | hypothetical protein LOC100044161 /// sema domain, immunoglobulin domain (Ig), short basic |
| 1420416_at   | -4.1  | Sema3a            | domain, secreted, (semaphorin) 3A                                                          |
| 1416256_a_at | -4.1  | Tubb5             | tubulin, beta 5                                                                            |
| 1416044_at   | -4.1  | Flii              | flightless I homolog (Drosophila)                                                          |
| 1416779_at   | -4.2  | Sdpr              | serum deprivation response                                                                 |
| 1435785_at   | -4.3  | Ehd2              | EH-domain containing 2                                                                     |
| 1433751_at   | -4.3  | Slc39a10          | solute carrier family 39 (zinc transporter), member 10                                     |
| 1452861_at   | -4.3  | 2010300C02Rik     | RIKEN cDNA 2010300C02 gene                                                                 |
| 1424130_a_at | -4.3  | Ptrf              | polymerase I and transcript release factor                                                 |
| 1450641_at   | -4.4  | Vim               | vimentin                                                                                   |
| 1450920_at   | -4.5  | Ccnb2             | cyclin B2                                                                                  |
| 1455627_at   | -4.6  | Col8a1            | collagen, type VIII, alpha 1                                                               |
| 1433825_at   | -4.6  | Ntrk3             | neurotrophic tyrosine kinase, receptor, type 3                                             |
| 1455160_at   | -4.6  | 2610203C20Rik     | RIKEN cDNA 2610203C20 gene                                                                 |
| 1418840_at   | -4.7  | Pdcd4             | programmed cell death 4                                                                    |
| 1426369_at   | -4.8  | Far1              | fatty acyl CoA reductase 1                                                                 |
| 1450062_a_at | -4.8  | Maged1            | melanoma antigen, family D, 1                                                              |
|              |       | LOC100044161 ///  | hypothetical protein LOC100044161 /// sema domain, immunoglobulin domain (Ig), short basic |
| 1449865_at   | -4.8  | Sema3a            | domain, secreted, (semaphorin) 3A                                                          |
| 1416967_at   | -4.9  | Sox2              | SRY-box containing gene 2                                                                  |
| 1460184_at   | -5.3  | Hadh              | hydroxyacyl-Coenzyme A dehydrogenase                                                       |
| 1415822_at   | -5.4  | Scd2              | stearoyl-Coenzyme A desaturase 2                                                           |
| 1455940_x_at | -5.5  | Wdr6              | WD repeat domain 6                                                                         |
| 1455972_x_at | -5.6  | Hadh              | hydroxyacyl-Coenzyme A dehydrogenase                                                       |
| 1459823_at   | -5.8  | Ehd2              | EH-domain containing 2                                                                     |
| 1420622_a_at | -6.1  | Hspa8             | heat shock protein 8                                                                       |
| 1420623_x_at | -6.2  | Hspa8             | heat shock protein 8                                                                       |
| 1456393_at   | -6.3  | 2310002J21Rik     | RIKEN cDNA 2310002J21 gene                                                                 |
| 1423642_at   | -6.6  | Tubb2c            | tubulin, beta 2c                                                                           |
| 1438195_at   | -7.0  | Gpd1l             | glycerol-3-phosphate dehydrogenase 1-like                                                  |
| 1417852_x_at | -7.1  | Clca1             | chloride channel calcium activated 1                                                       |
| 1460259_s_at | -7.7  | Clca1 /// Clca2   | chloride channel calcium activated 1 /// chloride channel calcium activated 2              |
| 1455719_at   | -7.7  | Tubb5             | tubulin, beta 5                                                                            |
| 1436528_at   | -9.0  | Kazald1           | Kazal-type serine peptidase inhibitor domain 1                                             |
| 1425789_s_at | -11.1 | Anxa8             | annexin A8                                                                                 |
| 1416326_at   | -23.2 | Crip1             | cysteine-rich protein 1 (intestinal)                                                       |

Table S5. Shared 'ChAG and cancer' signature mGEP response (fdr threshold 0.005).

| Moe430_2<br>GeneChip<br>probeset | FDR         | fold-change<br>chag | fold-change<br>cancer | gene symbol                            | gene description                                                                              |
|----------------------------------|-------------|---------------------|-----------------------|----------------------------------------|-----------------------------------------------------------------------------------------------|
| 1419149_at                       | 7.74E-08    | 24.3                | 10.8                  | Serpine1                               | serine (or cysteine) peptidase inhibitor, clade E, member 1                                   |
| 1420197_at                       | 1.85E-05    | 16.1                | 15.5                  | Gadd45b<br>Casp4 ///                   | Growth arrest and DNA-damage-inducible 45 beta, mRNA (cDNA clone MGC:36156 IMAGE:5355150)     |
| 1449591_at                       | 0.001027524 | 14.4                | 15.8                  | LOC100044206                           | caspase 4, apoptosis-related cysteine peptidase /// hypothetical protein LOC100044206         |
| 1418536_at                       | 7.21E-13    | 13.4                | 4.5                   | H2-Q7                                  | histocompatibility 2, Q region locus 7                                                        |
| 1418829_a at                     | 0.000101116 | 9.8                 | 11.8                  | Eno2                                   | enolase 2, gamma neuronal                                                                     |
| 1419675_at                       | 5.29E-05    | 9.6                 | 8.1                   | Ngf                                    | nerve growth factor                                                                           |
| 1433453_a at                     | 0.000149225 | 9.1                 | 6.9                   | Abtb2                                  | ankyrin repeat and BTB (POZ) domain containing 2                                              |
| 1448485_at                       | 2.43E-16    | 8.8                 | 4.3                   | Ggt1                                   | gamma-glutamyltransferase 1                                                                   |
| 1448610_a at                     | 1.26E-05    | 8.3                 | 4.7                   | Sod2                                   | superoxide dismutase 2, mitochondrial                                                         |
| 1447612_x at                     | 2.05E-06    | 8.1                 | 5.2                   | Jmjd3                                  | jumonji domain containing 3                                                                   |
| 1418188_a at                     | 0.001225019 | 8.0                 | 8.7                   | Malat1                                 | metastasis associated lung adenocarcinoma transcript 1 (non-coding RNA)                       |
| 1458802_at                       | 2.86E-05    | 7.4                 | 6.5                   | Hivep3                                 | human immunodeficiency virus type I enhancer binding protein 3                                |
| 1423904_a at                     | 0.00138512  | 6.8                 | 7.7                   | Pvr                                    | poliovirus receptor                                                                           |
| 1438157_s at                     | 0.000204561 | 6.8                 | 5.1                   | Nfkbia                                 | nuclear factor of kappa light polypeptide gene enhancer in B-cells inhibitor, alpha           |
| 1418105_at                       | 6.59E-12    | 6.4                 | 3.6                   | Stmn4                                  | stathmin-like 4                                                                               |
| 1439787_at                       | 1.07E-07    | 6.4                 | 8.7                   | P2rx7                                  | purinergic receptor P2X, ligand-gated ion channel, 7                                          |
| 1420515_a at                     | 1.51E-40    | 5.8                 | 2.6                   | Pglyrp2                                | peptidoglycan recognition protein 2                                                           |
| 1419853_a at                     | 0.001043317 | 5.7                 | 6.3                   | P2rx7                                  | purinergic receptor P2X, ligand-gated ion channel, 7                                          |
| 1460602_at                       | 0.000202914 | 5.5                 | 5.5                   | Dlc1                                   | deleted in liver cancer 1                                                                     |
| 1438707_at                       | 2.16E-13    | 5.4                 | 3.5                   | Atp13a4 ///<br>LOC637970               | ATPase type 13A4 /// similar to type V P-type ATPase isoform 4                                |
| 1451160_s at                     | 0.004185843 | 5.4                 | 5.1                   | Pvr                                    | poliovirus receptor                                                                           |
| 1436173_at                       | 1.64E-07    | 5.2                 | 4.2                   | Dlc1                                   | deleted in liver cancer 1                                                                     |
| 1435540_at                       | 2.58E-06    | 5.2                 | 3.1                   | Irgq                                   | immunity-related GTPase family, Q                                                             |
| 1435108_at                       | 0.000307925 | 4.9                 | 4.0                   | Arhgap22                               | Rho GTPase activating protein 22                                                              |
| 1424959_at                       | 5.61E-14    | 4.9                 | 2.8                   | Anxa13                                 | annexin A13                                                                                   |
| 1434350_at                       | 1.85E-09    | 4.8                 | 4.0                   | Axud1                                  | AXIN1 up-regulated 1                                                                          |
| 1460336_at                       | 0.003770986 | 4.8                 | 5.1                   | Ppargc1a                               | peroxisome proliferative activated receptor, gamma, coactivator 1 alpha                       |
| 1440346_at                       | 0.003708743 | 4.7                 | 7.8                   | Jmjd3                                  | Jumonji domain containing 3, mRNA (cDNA clone IMAGE:1378940)                                  |
| 1447870_x at                     | 0.000179536 | 4.6                 | 8.5                   | 1110002E22Rik                          | RIKEN cDNA 1110002E22 gene                                                                    |
| 1428909_at                       | 3.66E-06    | 4.6                 | 3.1                   | A130040M12Rik<br>Fosl2 ///             | RIKEN cDNA A130040M12 gene                                                                    |
| 1437247_at                       | 1.98E-06    | 4.5                 | 5.6                   | LOC634417                              | fos-like antigen 2 /// similar to fos-like antigen 2                                          |
| 1426464_at                       | 2.34E-06    | 4.5                 | 4.2                   | Nr1d1                                  | nuclear receptor subfamily 1, group D, member 1                                               |
| 1455029_at                       | 1.92E-08    | 4.4                 | 3.6                   | Kif21a                                 | kinesin family member 21A                                                                     |
| 1424408_at                       | 5.00E-07    | 4.4                 | 4.4                   | Lims2                                  | LIM and senescent cell antigen like domains 2                                                 |
| 1435137_s at                     | 3.75E-05    | 4.3                 | 3.0                   | 1200015M12Rik ///<br>1200016E24Rik /// | RIKEN cDNA 1200015M12 gene /// RIKEN cDNA 1200016E24 gene /// RIKEN cDNA                      |
| 1421756_a at                     | 4.67E-26    | 4.2                 | 3.3                   | E430024C06Rik                          | A130040M12 gene /// RIKEN cDNA E430024C06 gene                                                |
| 1426526_s at                     | 5.29E-06    | 4.1                 | 3.6                   | Gpr19                                  | G protein-coupled receptor 19                                                                 |
| 1449702_at                       | 0.000846408 | 4.1                 | 3.9                   | Ovgp1                                  | oviductal glycoprotein 1                                                                      |
| 1428691_at                       | 0.000221494 | 4.1                 | 4.9                   | Zfand2a                                | zinc finger, AN1-type domain 2A                                                               |
| 1429588_at                       | 7.03E-06    | 4.1                 | 6.9                   | Chd2                                   | chromodomain helicase DNA binding protein 2                                                   |
| 1415941_s at                     | 0.00405687  | 4.0                 | 4.1                   | 2810474O19Rik                          | RIKEN cDNA 2810474O19 gene                                                                    |
| 1434054_at                       | 0.000135236 | 3.9                 | 3.0                   | Zfand2a                                | zinc finger, AN1-type domain 2A                                                               |
| 1427160_at                       | 7.58E-10    | 3.9                 | 3.5                   | Mafg                                   | v-maf musculoaponeurotic fibrosarcoma oncogene family, protein G (avian)                      |
| 1435470_at                       | 4.88E-10    | 3.6                 | 3.0                   | Pcf11                                  | cleavage and polyadenylation factor subunit homolog (S. cerevisiae)                           |
| 1452397_at                       | 0.003174175 | 3.6                 | 5.0                   | LOC547150                              | similar to p47 protein                                                                        |
| 1453181_x at                     | 0.000607416 | 3.6                 | 3.2                   | 2810474O19Rik                          | RIKEN cDNA 2810474O19 gene                                                                    |
| 1417612_at                       | 4.18E-05    | 3.6                 | 2.6                   | Plscr1                                 | phospholipid scramblase 1                                                                     |
| 1419029_at                       | 0.004174168 | 3.5                 | 5.1                   | Ier5                                   | immediate early response 5                                                                    |
| 1441737_s at                     | 0.000244638 | 3.5                 | 4.9                   | Ero1l                                  | ERO1-like (S. cerevisiae)                                                                     |
| 1452214_at                       | 4.86E-06    | 3.5                 | 4.5                   | Rassf1                                 | Ras association (RalGDS/AF-6) domain family member 1                                          |
| 1425020_at                       | 0.000260283 | 3.4                 | 5.3                   | Skil                                   | SKI-like                                                                                      |
| 1426726_at                       | 7.94E-05    | 3.4                 | 2.8                   | EG621629 ///                           | EG621629 ///                                                                                  |
| 1420618_at                       | 4.96E-06    | 3.4                 | 4.4                   | Ubxn2a                                 | predicted gene, EG621629 /// UBX domain protein 2A                                            |
| 1447923_at                       | 0.002728509 | 3.3                 | 5.8                   | LOC677319 ///                          | similar to protein phosphatase 1, regulatory subunit 10 /// protein phosphatase 1, regulatory |
| 1439488_at                       | 2.45E-10    | 3.2                 | 2.9                   | Ppp1r10                                | subunit 10                                                                                    |
| 1427005_at                       | 0.002728692 | 3.2                 | 4.7                   | Cpeb4                                  | cytoplasmic polyadenylation element binding protein 4                                         |
| 1434405_at                       | 1.68E-06    | 3.2                 | 5.9                   | 1810026B05Rik                          | (1810026B05Rik), mRNA                                                                         |
| 1418189_s at                     | 2.34E-06    | 3.2                 | 2.9                   | Dot1l                                  | DOT1-like, histone H3 methyltransferase (S. cerevisiae)                                       |
| 1447685_x at                     | 0.004191503 | 3.1                 | 3.7                   | Plk2                                   | polo-like kinase 2 (Drosophila)                                                               |
| 1418835_at                       | 0.000965289 | 3.1                 | 3.8                   | Fnip1                                  | folliculin interacting protein 1                                                              |
| 1423173_at                       | 0.000571042 | 3.1                 | 3.4                   | Malat1                                 | metastasis associated lung adenocarcinoma transcript 1 (non-coding RNA)                       |
| 1418422_at                       | 1.69E-08    | 3.1                 | 2.8                   | Ets2                                   | E26 avian leukemia oncogene 2, 3' domain                                                      |
| 1419203_at                       | 5.68E-07    | 3.0                 | 3.9                   | Phlda1                                 | pleckstrin homology-like domain, family A, member 1                                           |
| 1428982_at                       | 8.96E-06    | 3.0                 | 3.5                   | Napb                                   | N-ethylmaleimide sensitive fusion protein attachment protein beta                             |
| 1456699_s at                     | 0.00086634  | 3.0                 | 2.6                   | Serpib9g                               | serine (or cysteine) peptidase inhibitor, clade B, member 9g                                  |
| 1424861_at                       | 0.000396513 | 2.9                 | 3.1                   | Gtlf3a                                 | gene trap locus F3a                                                                           |
| 1452406_x at                     | 0.001092326 | 2.9                 | 2.9                   | Atad2b                                 | ATPase family, AAA domain containing 2B                                                       |
| 1434184_s at                     | 2.85E-06    | 2.9                 | 3.9                   | Ythdc1                                 | YTH domain containing 1                                                                       |
| 1425241_a at                     | 7.85E-07    | 2.9                 | 3.8                   | D930016D06Rik                          | RIKEN cDNA D930016D06 gene                                                                    |
| 1448239_at                       | 0.001936294 | 2.9                 | 3.0                   | Erd1r                                  | erythroid differentiation regulator 1                                                         |
| 1427521_a at                     | 0.000292729 | 2.9                 | 2.3                   | Map4k4                                 | mitogen-activated protein kinase kinase kinase 4                                              |
| 1435402_at                       | 0.002999936 | 2.8                 | 2.8                   | Wsb1                                   | WD repeat and SOCS box-containing 1                                                           |
| 1429262_at                       | 6.87E-09    | 2.8                 | 3.3                   | Hmox1                                  | heme oxygenase (decycling) 1                                                                  |
|                                  |             |                     |                       | 9930023K05Rik                          | RIKEN cDNA 9930023K05 gene                                                                    |
|                                  |             |                     |                       | Gramd1b                                | GRAM domain containing 1B                                                                     |
|                                  |             |                     |                       | Rassf6                                 | Ras association (RalGDS/AF-6) domain family member 6                                          |

|              |             |      |      |                    |                                                                                                  |
|--------------|-------------|------|------|--------------------|--------------------------------------------------------------------------------------------------|
| 1422033_a_at | 9.60E-09    | 2.8  | 2.4  | Cntf /// Zfp91 /// | ciliary neurotrophic factor /// zinc finger protein 91 /// zinc finger protein 91, ciliary       |
| 1453294_at   | 5.85E-08    | 2.8  | 2.5  | Zfp91-cntf         | neurotrophic factor transcription unit                                                           |
| 1435597_at   | 2.32E-05    | 2.8  | 2.5  | 1700012B15Rik      | RIKEN cDNA 1700012B15 gene                                                                       |
| 1422864_at   | 0.003720958 | 2.7  | 2.8  | Atad5              | ATPase family, AAA domain containing 5                                                           |
| 1432103_a_at | 6.30E-05    | 2.7  | 2.2  | Runx1              | runt related transcription factor 1                                                              |
| 1421499_a_at | 2.05E-06    | 2.7  | 2.4  | Sh3ql3             | SH3-domain GRB2-like 3                                                                           |
| 1418540_a_at | 0.000700533 | 2.7  | 2.5  | Ptpn14             | protein tyrosine phosphatase, non-receptor type 14                                               |
| 1455046_a_at | 3.24E-05    | 2.7  | 2.2  | Ptpre              | protein tyrosine phosphatase, receptor type, E                                                   |
| 1448263_a_at | 0.001462483 | 2.7  | 2.9  | Pogz               | pogo transposable element with ZNF domain                                                        |
| 1429556_at   | 1.34E-07    | 2.6  | 3.5  | Cndp2              | CNDP dipeptidase 2 (metallopeptidase M20 family)                                                 |
| 1454655_at   | 1.90E-06    | 2.6  | 2.0  | 2610024B07Rik      | RIKEN cDNA 2610024B07 gene                                                                       |
| 1435062_at   | 0.000246984 | 2.6  | 2.6  | Dgkd               | diacylglycerol kinase, delta                                                                     |
| 1424892_at   | 2.52E-05    | 2.6  | 4.9  | 1500001A10Rik      | RIKEN cDNA 1500001A10 gene                                                                       |
| 1419241_a_at | 8.32E-06    | 2.6  | 2.2  | Zkscan5            | zinc finger with KRAB and SCAN domains 5                                                         |
| 1434687_at   | 3.77E-07    | 2.5  | 2.4  | Aire               | autoimmune regulator (autoimmune polyendocrinopathy candidiasis ectodermal dystrophy)            |
| 1435091_at   | 8.65E-14    | 2.5  | 2.1  | C730026J16         | hypothetical protein C730026J16                                                                  |
| 1426725_s_at | 5.60E-08    | 2.5  | 3.5  | Zfp568             | zinc finger protein 568                                                                          |
| 1426528_at   | 1.66E-05    | 2.5  | 2.7  | Ets1               | E26 avian leukemia oncogene 1, 5' domain                                                         |
|              |             |      |      | Nrp2 /// Pard3b    | neuropilin 2 /// par-3 partitioning defective 3 homolog B (C. elegans)                           |
|              |             |      |      |                    | BTAF1 RNA polymerase II, B-TFIIID transcription factor-associated, (Mot1 homolog, S. cerevisiae) |
| 1435249_at   | 0.002564004 | 2.4  | 3.0  | Btaf1              | oligonucleotide/oligosaccharide-binding fold containing 2A                                       |
| 1426806_at   | 0.000260062 | 2.4  | 2.8  | Obfc2a             | NUAK family, SNF1-like kinase, 1                                                                 |
| 1438684_at   | 6.34E-05    | 2.4  | 2.9  | Nuak1              | NUAK family, SNF1-like kinase, 1                                                                 |
| 1449217_at   | 0.003174175 | 2.3  | 2.4  | Casp8ap2           | caspase 8 associated protein 2                                                                   |
| 1454923_at   | 2.72E-05    | 2.3  | 2.4  | lws1               | IWS1 homolog (S. cerevisiae)                                                                     |
| 1435341_at   | 0.0005797   | 2.3  | 2.7  | Ppig               | peptidyl-prolyl isomerase G (cyclophilin G)                                                      |
| 1434746_at   | 0.003654065 | 2.3  | 3.3  | Mga                | MAX gene associated                                                                              |
| 1416274_at   | 1.53E-16    | 2.3  | 2.0  | Ctns               | cystinosis, nephropathic                                                                         |
| 1448135_at   | 0.00169772  | 2.3  | 2.8  | Atf4               | activating transcription factor 4                                                                |
| 1442038_at   | 0.002787392 | 2.3  | 2.7  | Rbm26              | RNA binding motif protein 26                                                                     |
| 1429907_at   | 2.92E-05    | 2.3  | 2.4  | 1700094D03Rik      | RIKEN cDNA 1700094D03 gene                                                                       |
| 1460315_s_at | 9.63E-08    | 2.2  | 1.8  | Tbk1               | TANK-binding kinase 1                                                                            |
|              |             |      |      | LOC100048538 ///   |                                                                                                  |
| 1440686_at   | 5.45E-05    | 2.2  | 2.9  | Prss27             | similar to protease, serine 27 /// protease, serine 27                                           |
| 1429400_at   | 7.74E-07    | 2.2  | 1.9  | Clcn5              | chloride channel 5                                                                               |
| 1456865_x_at | 0.001566655 | 2.2  | 2.2  | Rrs1               | RRS1 ribosome biogenesis regulator homolog (S. cerevisiae)                                       |
| 1416419_s_at | 0.002317161 | 2.2  | 2.2  | Gabarap1           | gamma-aminobutyric acid (GABA(A)) receptor-associated protein-like 1                             |
| 1450711_at   | 8.06E-16    | 2.2  | 1.8  | Brd4               | bromodomain containing 4                                                                         |
| 1434513_at   | 4.71E-08    | 2.2  | 2.6  | Atp13a3            | ATPase type 13A3                                                                                 |
| 1435039_a_at | 0.000518671 | 2.1  | 2.1  | Pip5k1a            | phosphatidylinositol-4-phosphate 5-kinase, type 1 alpha                                          |
| 1416187_s_at | 0.002071493 | 2.1  | 2.8  | Pnrc2              | proline-rich nuclear receptor coactivator 2                                                      |
| 1417671_at   | 6.24E-07    | 2.1  | 1.9  | Scly               | selenocysteine lyase                                                                             |
| 1456389_at   | 0.001616801 | 2.1  | 2.8  | Zeb2               | zinc finger E-box binding homeobox 2                                                             |
| 1454774_at   | 0.000266469 | 2.1  | 2.7  | Zfp445             | zinc finger protein 445                                                                          |
| 1437635_at   | 0.004785408 | 2.1  | 2.7  | Dcbl2              | discoidin, CUB and LCCL domain containing 2                                                      |
| 1437851_x_at | 0.000101116 | 2.0  | 1.8  | Rnps1              | ribonucleic acid binding protein S1                                                              |
| 1455309_at   | 4.08E-06    | 2.0  | 1.8  | Ano6               | anoctamin 6                                                                                      |
| 1455430_at   | 0.003405199 | 2.0  | 2.6  | Prr8               | proline rich 8                                                                                   |
| 1419354_at   | 0.000816352 | 2.0  | 2.4  | Klf7               | Kruppel-like factor 7 (ubiquitous)                                                               |
| 1457473_at   | 0.000124245 | 2.0  | 1.8  | Chd1               | chromodomain helicase DNA binding protein 1                                                      |
| 1417964_at   | 3.29E-05    | 2.0  | 2.1  | Ap3d1              | adaptor-related protein complex 3, delta 1 subunit                                               |
| 1449061_a_at | 0.000930108 | 2.0  | 2.9  | Prim1              | DNA primase, p49 subunit                                                                         |
| 1423799_at   | 0.000982751 | 2.0  | 2.1  | Eif1               | eukaryotic translation initiation factor 1                                                       |
| 1419400_at   | 0.000134537 | 1.9  | 2.4  | Mttf               | microsomal triglyceride transfer protein                                                         |
| 1455110_at   | 0.000174578 | 1.9  | 1.9  | Gabpb2             | GA repeat binding protein, beta 2                                                                |
| 1440868_at   | 0.001455108 | 1.9  | 2.4  | Gabpb2             | GA repeat binding protein, beta 2                                                                |
| 1416303_at   | 0.00390029  | 1.9  | 2.5  | Litaf              | LPS-induced TN factor                                                                            |
| 1417022_at   | 0.000130469 | 1.9  | 1.7  | Slc7a3             | solute carrier family 7 (cationic amino acid transporter, y+ system), member 3                   |
| 1427285_s_at | 0.000259875 | 1.9  | 1.9  | Malat1             | metastasis associated lung adenocarcinoma transcript 1 (non-coding RNA)                          |
| 1455765_a_at | 8.40E-05    | 1.9  | 1.9  | Abcc8              | ATP-binding cassette, sub-family C (CFTR/MRP), member 8                                          |
| 1433599_at   | 0.00099599  | 1.8  | 2.0  | Baz1a              | bromodomain adjacent to zinc finger domain 1A                                                    |
| 1451225_at   | 9.83E-07    | 1.8  | 2.1  | Ptpn11             | protein tyrosine phosphatase, non-receptor type 11                                               |
| 1436885_a_at | 0.000513594 | 1.8  | 1.9  | Cherp              | calcium homeostasis endoplasmic reticulum protein                                                |
| 1423798_a_at | 0.00029704  | 1.8  | 2.0  | Eif1               | eukaryotic translation initiation factor 1                                                       |
| 1437984_x_at | 2.98E-07    | 1.8  | 1.8  | Bat1a              | HLA-B-associated transcript 1A                                                                   |
| 1429085_at   | 1.08E-06    | 1.8  | 2.3  | VeZF1              | vascular endothelial zinc finger 1                                                               |
| 1436174_at   | 0.003392178 | 1.7  | 1.8  | Atad2              | ATPase family, AAA domain containing 2                                                           |
| 1434005_at   | 0.00395958  | 1.7  | 2.4  | Rbms1              | RNA binding motif, single stranded interacting protein 1                                         |
| 1460597_at   | 0.001043317 | 1.7  | 1.6  | Asxl2              | additional sex combs like 2 (Drosophila)                                                         |
| 1458163_at   | 0.000612461 | 1.7  | 1.7  | BC066028           | cDNA sequence BC066028                                                                           |
| 1459765_s_at | 3.77E-07    | 1.7  | 1.9  | Sf1                | splicing factor 1                                                                                |
| 1455389_s_at | 0.001744678 | 1.7  | 1.6  | 2310051F07Rik      | RIKEN cDNA 2310051F07 gene                                                                       |
| 1455261_at   | 0.002648473 | 1.7  | 1.9  | Luc7l              | Luc7 homolog (S. cerevisiae)-like                                                                |
| 1419920_s_at | 4.59E-07    | 1.7  | 1.4  | Usp7               | ubiquitin specific peptidase 7                                                                   |
| 1455148_at   | 0.000307667 | 1.6  | 1.7  | Tmem130            | transmembrane protein 130                                                                        |
| 1449158_at   | 0.001898025 | 1.6  | 1.6  | Kcnk2              | potassium channel, subfamily K, member 2                                                         |
| 1456844_at   | 0.000179889 | 1.6  | 2.1  | Camk2d             | calcium/calmodulin-dependent protein kinase II, delta                                            |
| 1439620_at   | 0.002057438 | 1.5  | 1.9  | Car13              | carbonic anhydrase 13                                                                            |
| 1437304_at   | 0.00395958  | 1.5  | 1.8  | Cblb               | Casitas B-lineage lymphoma b                                                                     |
| 1436454_x_at | 0.00213889  | 1.5  | 1.5  | Fen1               | flap structure specific endonuclease 1                                                           |
| 1453334_at   | 0.000144124 | 1.5  | 1.4  | B230216N24Rik      | RIKEN cDNA B230216N24 gene                                                                       |
| 1431180_at   | 0.001727458 | 1.3  | 1.4  | Zfp433             | RIKEN cDNA 1700123A16 gene                                                                       |
| 1447997_s_at | 0.001124082 | 1.2  | 1.2  | Timm8a2            | translocase of inner mitochondrial membrane 8 homolog a2 (yeast)                                 |
| 1456308_x_at | 0.001122996 | -1.4 | -2.0 | Trim28             | tripartite motif-containing 28                                                                   |
|              |             |      |      | ENSMUSG0000004     |                                                                                                  |
| 1423455_at   | 0.000214952 | -1.4 | -1.4 | 5799 /// Ptma      | predicted gene, ENSMUSG00000045799 /// prothymosin alpha                                         |
| 1415701_x_at | 1.14E-08    | -1.4 | -1.3 | Rpl23              | ribosomal protein L23                                                                            |
| 1434588_x_at | 0.004451187 | -1.4 | -1.4 | EG620313 /// Tbca  | predicted gene, EG620313 /// tubulin cofactor a                                                  |
| 1439443_x_at | 0.004205228 | -1.4 | -1.9 | Tkt                | transketolase                                                                                    |



|              |             |      |      |                    |                                                                                                  |
|--------------|-------------|------|------|--------------------|--------------------------------------------------------------------------------------------------|
| 1439069_a_at | 0.001979211 | -1.4 | -1.6 | 4933439C20Rik      | RIKEN cDNA 4933439C20 gene                                                                       |
| 1455578_x_at | 3.19E-06    | -1.5 | -1.4 | Rpl41              | ribosomal protein L41                                                                            |
|              |             |      |      | EG667682 ///       |                                                                                                  |
|              |             |      |      | ENSMUSG00000006    |                                                                                                  |
|              |             |      |      | 6956 /// Ero11 /// | predicted gene, EG667682 /// predicted gene, ENSMUSG0000006956 /// ERO1-like (S. cerevisiae) /// |
| 1460008_x_at | 0.000179889 | -1.5 | -1.5 | Rpl31              | ribosomal protein L31                                                                            |
| 1423429_at   | 0.001878537 | -1.5 | -1.5 | Rhox5              | reproductive homeobox 5                                                                          |
| 1422623_x_at | 0.003367776 | -1.5 | -1.6 | Rpl41              | ribosomal protein L41                                                                            |
|              |             |      |      | 100041163 ///      |                                                                                                  |
|              |             |      |      | 100041478 ///      |                                                                                                  |
|              |             |      |      | ENSMUSG00000006    |                                                                                                  |
|              |             |      |      | 3556 ///           |                                                                                                  |
|              |             |      |      | ENSMUSG00000007    |                                                                                                  |
|              |             |      |      | 1532 ///           | predicted gene, 100041163 /// predicted gene, 100041478 /// predicted gene,                      |
|              |             |      |      | LOC100046821 ///   | ENSMUSG00000063556 /// predicted gene, ENSMUSG00000071532 /// similar to                         |
| 1426660_x_at | 0.000201141 | -1.5 | -1.5 | Rpl23a             | ribosomal protein L23a /// ribosomal protein L23a                                                |
|              |             |      |      | EG665562 ///       |                                                                                                  |
|              |             |      |      | EG667682 ///       |                                                                                                  |
|              |             |      |      | EG668850 ///       |                                                                                                  |
|              |             |      |      | ENSMUSG00000006    |                                                                                                  |
|              |             |      |      | 6956 /// Ero11 /// |                                                                                                  |
|              |             |      |      | LOC638399 ///      |                                                                                                  |
|              |             |      |      | LOC673582 ///      | predicted gene, EG665562 /// predicted gene, EG667682 /// predicted gene, EG668850 ///           |
|              |             |      |      | LOC675018 ///      | predicted gene, ENSMUSG0000006956 /// ERO1-like (S. cerevisiae) /// similar to                   |
|              |             |      |      | OTTMUSG00000000    | ribosomal protein L31 /// similar to ribosomal protein L31 /// similar to ribosomal protein L31  |
| 1436924_x_at | 4.64E-05    | -1.5 | -1.5 | 9823 /// Rpl31     | ribosomal protein L31                                                                            |
| 1448242_at   | 0.000846408 | -1.5 | -1.8 | Sec61a1            | Sec61 alpha 1 subunit (S. cerevisiae)                                                            |
| 1433822_x_at | 0.000956838 | -1.6 | -1.7 | Anapc5             | anaphase-promoting complex subunit 5                                                             |
|              |             |      |      | EG665562 ///       |                                                                                                  |
|              |             |      |      | EG667682 ///       |                                                                                                  |
|              |             |      |      | ENSMUSG00000006    |                                                                                                  |
|              |             |      |      | 6956 /// LOC638399 |                                                                                                  |
|              |             |      |      | /// LOC673582 ///  | predicted gene, EG665562 /// predicted gene, EG667682 /// predicted gene,                        |
| 1428212_x_at | 2.67E-06    | -1.6 | -1.6 | LOC675018 ///      | ENSMUSG0000006956 /// similar to ribosomal protein L31 /// similar to ribosomal protein          |
| 1416415_a_at | 0.003690389 | -1.6 | -1.6 | Rpl31              | L31 /// similar to ribosomal protein L31 /// ribosomal protein L31                               |
| 1436883_at   | 0.001828599 | -1.6 | -2.2 | H2afz              | H2A histone family, member Z                                                                     |
| 1433645_at   | 0.000578528 | -1.6 | -2.6 | Mbtps2             | membrane-bound transcription factor peptidase, site 2                                            |
|              |             |      |      | Slc44a1            | solute carrier family 44, member 1                                                               |
|              |             |      |      | LOC674712 ///      |                                                                                                  |
| 1441866_s_at | 0.000608216 | -1.6 | -2.3 | Ptdss1             | similar to phosphatidyserine synthase 1 /// phosphatidyserine synthase 1                         |
|              |             |      |      | Dnajc10 ///        | DnaJ (Hsp40) homolog, subfamily C, member 10 /// similar to DnaJ (Hsp40) homolog,                |
| 1426904_s_at | 0.0023896   | -1.6 | -1.7 | LOC100047007       | subfamily C, member 10                                                                           |
|              |             |      |      | OTTMUSG00000001    |                                                                                                  |
| 1415833_x_at | 0.004184234 | -1.6 | -1.8 | 6246 /// Rps29     | predicted gene, OTTMUSG00000016246 /// ribosomal protein S29                                     |
| 1417810_a_at | 0.002389601 | -1.6 | -1.6 | Kcnb1 /// Pacsin2  | potassium voltage gated channel, Shab-related subfamily, member 1 /// protein kinase C           |
|              |             |      |      | LOC100044627 ///   | and casein kinase substrate in neurons 2                                                         |
| 1460680_a_at | 1.52E-15    | -1.6 | -1.4 | Rpl23              | similar to HL23 ribosomal protein /// ribosomal protein L23                                      |
| 1417323_at   | 0.000447145 | -1.6 | -2.7 | Psrf1              | proline/serine-rich coiled-coil 1                                                                |
| 1453034_at   | 0.003459983 | -1.7 | -1.6 | Zfp251             | zinc finger protein 251                                                                          |
| 1437389_x_at | 0.001704532 | -1.7 | -2.0 | Khdrbs1            | KH domain containing, RNA binding, signal transduction associated 1                              |
|              |             |      |      | 100041163 ///      |                                                                                                  |
|              |             |      |      | 100041478 ///      |                                                                                                  |
|              |             |      |      | ENSMUSG00000006    |                                                                                                  |
|              |             |      |      | 3556 ///           |                                                                                                  |
|              |             |      |      | LOC100046821 ///   | predicted gene, 100041163 /// predicted gene, 100041478 /// predicted gene,                      |
| 1426659_a_at | 1.94E-10    | -1.7 | -1.5 | Rpl23a             | ENSMUSG00000063556 /// similar to ribosomal protein L23a /// ribosomal protein L23a              |
| 1415821_at   | 0.001334051 | -1.7 | -1.7 | Nptn               | neuropilin                                                                                       |
| 1456128_at   | 0.004509574 | -1.7 | -1.8 | Atp5g2             | ATP synthase, H+ transporting, mitochondrial F0 complex, subunit c (subunit 9), isoform 2        |
| 1453729_a_at | 3.41E-08    | -1.7 | -1.6 | Rpl37              | ribosomal protein L37                                                                            |
| 1430288_x_at | 1.68E-06    | -1.7 | -1.8 | Rps21              | ribosomal protein S21                                                                            |
| 1434731_x_at | 1.07E-07    | -1.7 | -2.4 | Prdx1              | peroxiredoxin 1                                                                                  |
| 1452830_s_at | 0.000132992 | -1.7 | -1.8 | Cad                | carbamoyl-phosphate synthetase 2, aspartate transcarbamylase, and dihydroorotase                 |
| 1416539_at   | 9.00E-05    | -1.7 | -1.6 | Siae               | sialic acid acetyltransferase                                                                    |
| 1428884_at   | 0.003405199 | -1.7 | -2.2 | Tmem57             | transmembrane protein 57                                                                         |
|              |             |      |      | 4933439C20Rik ///  | RIKEN cDNA 4933439C20 gene /// phosphatidyserine decarboxylase pseudogene ///                    |
|              |             |      |      | LOC236604 /// Pisd | phosphatidyserine decarboxylase                                                                  |
| 1426387_x_at | 1.81E-05    | -1.7 | -2.2 | Wipi1              | WD repeat domain, phosphoinositide interacting 1                                                 |
| 1439060_s_at | 0.00243451  | -1.8 | -3.0 | Tmem165            | transmembrane protein 165                                                                        |
| 1415741_at   | 0.000993488 | -1.8 | -1.9 | Tbc1d8             | TBC1 domain family, member 8                                                                     |
| 1416996_at   | 0.000563732 | -1.8 | -1.7 | 100041163 ///      |                                                                                                  |
|              |             |      |      | 100042634 ///      |                                                                                                  |
|              |             |      |      | EG385336 ///       |                                                                                                  |
|              |             |      |      | EG664936 ///       |                                                                                                  |
|              |             |      |      | EG666548 ///       |                                                                                                  |
|              |             |      |      | ENSMUSG00000006    |                                                                                                  |
|              |             |      |      | 3556 ///           |                                                                                                  |
|              |             |      |      | ENSMUSG00000007    |                                                                                                  |
|              |             |      |      | 1532 ///           | predicted gene, 100041163 /// predicted gene, 100042634 /// predicted gene, EG385336 ///         |
|              |             |      |      | LOC100042058 ///   | predicted gene, EG664936 /// predicted gene, EG666548 /// predicted gene,                        |
|              |             |      |      | LOC100046821 ///   | ENSMUSG00000063556 /// predicted gene, ENSMUSG00000071532 /// similar to                         |
| 1437975_a_at | 1.85E-05    | -1.8 | -1.6 | Rpl23a             | ribosomal protein L23a /// similar to ribosomal protein L23a /// ribosomal protein L23a          |
| 1448103_s_at | 0.000351501 | -1.8 | -1.8 | Nono               | non-POU-domain-containing, octamer binding protein                                               |
| 1435612_at   | 1.98E-05    | -1.8 | -2.1 | Opcml              | opioid binding protein/cell adhesion molecule-like                                               |
| 1426576_at   | 0.000212531 | -1.8 | -1.8 | Sgms1              | sphingomyelin synthase 1                                                                         |
| 1424635_at   | 5.85E-08    | -1.8 | -1.5 | Eef1a1             | eukaryotic translation elongation factor 1 alpha 1                                               |
| 1416961_at   | 0.000700533 | -1.8 | -2.3 | Bub1b              | budding uninhibited by benzimidazoles 1 homolog, beta (S. cerevisiae)                            |

|              |             |      |      |                  |                                                                                                   |
|--------------|-------------|------|------|------------------|---------------------------------------------------------------------------------------------------|
| 1434091_at   | 0.004075222 | -1.8 | -2.2 | Faah             | fatty acid amide hydrolase                                                                        |
| 1426680_at   | 0.001878537 | -1.8 | -2.2 | Sepr1            | selenoprotein N, 1                                                                                |
| 1437159_at   | 0.000965561 | -1.8 | -1.8 | Glb1             | galactosidase, beta 1                                                                             |
| 1436691_x_at | 1.07E-17    | -1.8 | -2.4 | Prdx1            | peroxiredoxin 1                                                                                   |
| 1455022_at   | 0.002859526 | -1.9 | -2.5 | Strn             | striatin, calmodulin binding protein                                                              |
| 1438159_x_at | 0.001271644 | -1.9 | -2.0 | Ndufv2           | NADH dehydrogenase (ubiquinone) flavoprotein 2                                                    |
| 1456695_x_at | 0.000106082 | -1.9 | -1.9 | Anapc5           | anaphase-promoting complex subunit 5                                                              |
| 1416105_at   | 3.80E-05    | -1.9 | -1.9 | Nnt              | nicotinamide nucleotide transhydrogenase                                                          |
| 1437807_x_at | 0.000241738 | -1.9 | -2.2 | Ctnna1           | catenin (cadherin associated protein), alpha 1                                                    |
| 1448449_at   | 0.000436008 | -1.9 | -2.4 | Ripk3            | receptor-interacting serine-threonine kinase 3                                                    |
| 1421870_at   | 5.54E-07    | -1.9 | -1.6 | Trim44           | tripartite motif-containing 44                                                                    |
| 1423677_at   | 0.000531338 | -1.9 | -1.9 | Fkbp9            | FK506 binding protein 9                                                                           |
| 1451516_at   | 3.11E-05    | -1.9 | -1.8 | Rheb1            | Ras homolog enriched in brain like 1                                                              |
| 1426342_at   | 0.000634543 | -1.9 | -1.9 | Stt3b            | STT3, subunit of the oligosaccharyltransferase complex, homolog B (S. cerevisiae)                 |
| 1435178_x_at | 1.17E-05    | -1.9 | -2.0 | Anapc5           | anaphase-promoting complex subunit 5                                                              |
| 1436499_at   | 1.08E-05    | -1.9 | -2.0 | Sgms1            | sphingomyelin synthase 1                                                                          |
| 1424052_at   | 5.76E-06    | -1.9 | -1.8 | Thap4            | THAP domain containing 4                                                                          |
| 1417842_at   | 0.000125828 | -1.9 | -2.7 | Caml             | calcium modulating ligand                                                                         |
| 1460387_a_at | 0.000181624 | -1.9 | -1.7 | Siae             | sialic acid acetyltransferase                                                                     |
| 1418101_a_at | 8.13E-05    | -1.9 | -2.1 | Rtn3             | reticulon 3                                                                                       |
| 1455164_at   | 0.000137574 | -2.0 | -2.5 | Cdgap            | CDC42 GTPase-activating protein                                                                   |
| 1428600_at   | 0.000139231 | -2.0 | -3.2 | Nin              | ninein                                                                                            |
| 1424987_at   | 6.01E-05    | -2.0 | -1.9 | 5430435G22Rik    | RIKEN cDNA 5430435G22 gene                                                                        |
| 1423680_at   | 4.09E-06    | -2.0 | -2.2 | Fads1            | fatty acid desaturase 1                                                                           |
| 1421375_a_at | 0.000314009 | -2.0 | -2.0 | S100a6           | S100 calcium binding protein A6 (calcyclin)                                                       |
| 1456475_s_at | 0.004067997 | -2.0 | -3.2 | Prkar2b          | protein kinase, cAMP dependent regulatory, type II beta                                           |
| 1423030_at   | 0.004652823 | -2.0 | -3.0 | Vcp              | valosin containing protein                                                                        |
| 1450686_at   | 0.001066087 | -2.0 | -2.3 | Pon2             | paraoxonase 2                                                                                     |
| 1423071_x_at | 0.001361084 | -2.0 | -4.1 | 6720475J19Rik    | RIKEN cDNA 6720475J19 gene                                                                        |
| 1451015_at   | 0.003817486 | -2.0 | -2.0 | Tkt              | transketolase                                                                                     |
| 1416836_at   | 0.000451209 | -2.0 | -3.3 | Lrp10            | low-density lipoprotein receptor-related protein 10                                               |
| 1429019_s_at | 2.84E-05    | -2.0 | -2.0 | Pon2             | paraoxonase 2                                                                                     |
| 1452147_at   | 5.45E-06    | -2.0 | -2.0 | Sec24c           | Sec24 related gene family, member C (S. cerevisiae)                                               |
| 1434897_a_at | 0.000733357 | -2.0 | -2.1 | Slc25a4          | solute carrier family 25 (mitochondrial carrier, adenine nucleotide translocator), member 4       |
| 1455350_at   | 0.004025283 | -2.0 | -2.5 | Tmem62           | transmembrane protein 62                                                                          |
| 1435074_at   | 6.27E-10    | -2.0 | -2.1 | Tmem106b         | transmembrane protein 106B                                                                        |
| 1433805_at   | 5.40E-06    | -2.0 | -1.8 | Jak1             | Janus kinase 1                                                                                    |
| 1435157_at   | 0.002894919 | -2.0 | -2.0 | Hook3            | hook homolog 3 (Drosophila)                                                                       |
| 1448526_at   | 8.65E-05    | -2.0 | -2.0 | Kpnb1            | karyopherin (importin) beta 1                                                                     |
| 1416119_at   | 0.001469085 | -2.0 | -2.3 | Txn1             | thioredoxin 1                                                                                     |
| 1448149_at   | 7.45E-05    | -2.1 | -2.1 | Ctnna1           | catenin (cadherin associated protein), alpha 1                                                    |
|              |             |      |      | ENSMUSG0000005   |                                                                                                   |
|              |             |      |      | 0347 ///         |                                                                                                   |
|              |             |      |      | LOC100048142 /// | predicted gene, ENSMUSG00000050347 /// similar to thymosin, beta 10 /// thymosin, beta 10         |
| 1437185_s_at | 5.62E-05    | -2.1 | -3.3 | Tmsb10           | Tmsb10                                                                                            |
| 1422747_at   | 0.000846408 | -2.1 | -3.3 | Chek2            | CHK2 checkpoint homolog (S. pombe)                                                                |
| 1429304_at   | 1.48E-07    | -2.1 | -1.6 | Ankrd10          | ankyrin repeat domain 10                                                                          |
| 1428270_at   | 0.004788413 | -2.1 | -2.4 | Glt8d1           | glycosyltransferase 8 domain containing 1                                                         |
| 1415751_at   | 0.000205671 | -2.1 | -2.3 | Hp1bp3           | heterochromatin protein 1, binding protein 3                                                      |
|              |             |      |      |                  | SWI/SNF related, matrix associated, actin dependent regulator of chromatin, subfamily c, member 2 |
| 1428382_at   | 9.21E-05    | -2.1 | -4.0 | Smarcc2          | SMARCC2                                                                                           |
| 1428103_at   | 0.004185843 | -2.1 | -2.6 | Adam10           | a disintegrin and metalloproteinase domain 10                                                     |
| 1426350_at   | 0.00469351  | -2.1 | -2.5 | Mgat2            | mannoside acetylglucosaminyltransferase 2                                                         |
| 1428535_at   | 0.004804956 | -2.1 | -2.8 | 9430020K01Rik    | RIKEN cDNA 9430020K01 gene                                                                        |
| 1448619_at   | 5.13E-07    | -2.1 | -5.1 | Dhcr7            | 7-dehydrocholesterol reductase                                                                    |
| 1434478_at   | 0.000838648 | -2.1 | -2.9 | Heca             | headcase homolog (Drosophila)                                                                     |
| 1448474_at   | 0.000101421 | -2.1 | -1.9 | Nek7             | NIMA (never in mitosis gene a)-related expressed kinase 7                                         |
| 1418506_a_at | 0.001018924 | -2.1 | -2.3 | Prdx2            | peroxiredoxin 2                                                                                   |
| 1417028_a_at | 0.004599224 | -2.2 | -2.6 | Trim2            | tripartite motif-containing 2                                                                     |
| 1439184_s_at | 0.002255245 | -2.2 | -2.3 | Txnrc17          | thioredoxin domain containing 17                                                                  |
| 1434395_at   | 5.19E-05    | -2.2 | -3.5 | Man1a2           | mannosidase, alpha, class 1A, member 2                                                            |
| 1417090_at   | 0.001108275 | -2.2 | -3.6 | Rcn1             | reticulocalbin 1                                                                                  |
| 1433779_at   | 0.002853508 | -2.2 | -2.3 | Casc4            | cancer susceptibility candidate 4                                                                 |
| 1455419_at   | 1.66E-05    | -2.2 | -2.7 | D630045J12Rik    | RIKEN cDNA D630045J12 gene                                                                        |
| 1428412_at   | 0.001878537 | -2.2 | -2.9 | Tm9sf3           | transmembrane 9 superfamily member 3                                                              |
| 1448661_at   | 0.002075857 | -2.2 | -3.5 | Plcb3            | phospholipase C, beta 3                                                                           |
| 1417893_at   | 0.000534025 | -2.2 | -3.1 | Sfxn3            | sideroflexin 3                                                                                    |
|              |             |      |      | 100042986 ///    |                                                                                                   |
|              |             |      |      | OTTMUSG0000001   | predicted gene, 100042986 /// predicted gene, OTTMUSG00000015874 /// ribosomal protein L37a       |
| 1460543_x_at | 6.13E-05    | -2.2 | -2.4 | 5874 /// Rpl37a  | ribosomal protein L37a                                                                            |
| 1433908_a_at | 0.003677049 | -2.3 | -4.3 | Ctnn             | cortactin                                                                                         |
| 1424906_at   | 3.69E-05    | -2.3 | -2.7 | Pqhc3            | PQ loop repeat containing                                                                         |
| 1452155_a_at | 2.33E-06    | -2.3 | -2.2 | Ddx17            | DEAD (Asp-Glu-Ala-Asp) box polypeptide 17                                                         |
| 1435666_at   | 1.54E-06    | -2.3 | -3.3 | Mast3            | microtubule associated serine/threonine kinase 3                                                  |
| 1448486_at   | 6.09E-18    | -2.3 | -2.1 | Mut              | methylmalonyl-Coenzyme A mutase                                                                   |
| 1418000_a_at | 6.73E-08    | -2.3 | -1.7 | Itm2b            | integral membrane protein 2B                                                                      |
| 1424438_a_at | 0.000299946 | -2.3 | -4.4 | Leprot           | leptin receptor overlapping transcript                                                            |
|              |             |      |      | LOC674712 ///    |                                                                                                   |
| 1416372_at   | 0.001337056 | -2.3 | -2.2 | Ptdss1           | similar to phosphatidylinositol synthase 1 /// phosphatidylinositol synthase 1                    |
| 1428875_at   | 4.43E-05    | -2.3 | -2.5 | Golim4           | golgi integral membrane protein 4                                                                 |
| 1451068_s_at | 3.85E-07    | -2.3 | -2.1 | Rps25            | ribosomal protein S25                                                                             |
| 1428853_at   | 7.94E-05    | -2.3 | -3.8 | Ptch1            | patched homolog 1                                                                                 |
| 1433887_at   | 0.000481209 | -2.3 | -3.3 | Dnajc3           | DnaJ (Hsp40) homolog, subfamily C, member 3                                                       |
| 1420895_at   | 0.000192193 | -2.3 | -4.7 | Tgfr1            | transforming growth factor, beta receptor 1                                                       |
| 1451359_at   | 0.004599224 | -2.3 | -3.2 | Lpcat1           | lysophosphatidylcholine acyltransferase 1                                                         |
| 1437290_at   | 0.003245889 | -2.4 | -2.6 | Impad1           | inositol monophosphatase domain containing 1                                                      |
| 1421824_at   | 0.00017047  | -2.4 | -2.4 | Bace1            | beta-site APP cleaving enzyme 1                                                                   |
| 1418483_a_at | 0.004205228 | -2.4 | -2.7 | Ggta1            | glycoprotein galactosyltransferase alpha 1, 3                                                     |
| 1418238_at   | 4.35E-06    | -2.4 | -2.9 | Ivd              | isovaleryl coenzyme A dehydrogenase                                                               |

|              |             |      |       |                                      |                                                                                                                 |
|--------------|-------------|------|-------|--------------------------------------|-----------------------------------------------------------------------------------------------------------------|
| 1423120_at   | 1.22E-05    | -2.4 | -3.0  | Ide                                  | insulin degrading enzyme                                                                                        |
| 1423846_x_at | 2.30E-13    | -2.4 | -2.9  | Tuba1b                               | tubulin, alpha 1B                                                                                               |
| 1416664_at   | 0.00404261  | -2.4 | -2.9  | Cdc20                                | cell division cycle 20 homolog (S. cerevisiae)                                                                  |
| 1434891_at   | 0.00395958  | -2.4 | -4.7  | Ptqfrn                               | prostaglandin F2 receptor negative regulator                                                                    |
| 1435737_a_at | 0.001334051 | -2.4 | -2.5  | Nde1                                 | nuclear distribution gene E homolog 1 (A nidulans)                                                              |
| 1429896_at   | 0.001816642 | -2.4 | -2.7  | 5830408B19Rik                        | RIKEN cDNA 5830408B19 gene                                                                                      |
| 1415707_at   | 0.000124672 | -2.4 | -4.0  | Anapc2                               | anaphase promoting complex subunit 2                                                                            |
| 1450431_a_at | 3.04E-06    | -2.5 | -2.8  | Nedd4                                | neural precursor cell expressed, developmentally down-regulated 4                                               |
| 1448253_at   | 1.43E-06    | -2.5 | -2.3  | Glud1                                | glutamate dehydrogenase 1                                                                                       |
| 1417404_at   | 1.07E-06    | -2.5 | -4.1  | Elov6                                | ELOVL family member 6, elongation of long chain fatty acids (yeast)                                             |
| 1438847_at   | 0.0037093   | -2.5 | -3.2  | Mxd3                                 | Max dimerization protein 3                                                                                      |
| 1428624_at   | 0.000264216 | -2.5 | -3.4  | 2810482107Rik                        | RIKEN cDNA 2810482107 gene                                                                                      |
| 1416750_at   | 3.51E-05    | -2.5 | -3.9  | Sigmar1                              | sigma non-opioid intracellular receptor 1                                                                       |
| 1436747_at   | 0.000264768 | -2.5 | -7.0  | Fam100b                              | family with sequence similarity 100, member B                                                                   |
| 1448592_at   | 6.88E-05    | -2.5 | -3.1  | Crtap                                | cartilage associated protein                                                                                    |
| 1448241_at   | 0.002411532 | -2.5 | -2.8  | Gm2a                                 | GM2 ganglioside activator protein                                                                               |
| 1415698_at   | 0.003145224 | -2.5 | -3.3  | Golm1                                | golgi membrane protein 1                                                                                        |
| 1448647_at   | 0.000456024 | -2.5 | -3.1  | Man2a1                               | mannosidase 2, alpha 1                                                                                          |
| 1448960_at   | 0.002414133 | -2.6 | -3.3  | Cxxc5                                | CXXC finger 5                                                                                                   |
| 1427177_at   | 0.00077498  | -2.6 | -2.7  | Fyco1                                | FYVE and coiled-coil domain containing 1                                                                        |
| 1438976_x_at | 0.002419379 | -2.6 | -3.0  | Mat2a                                | methionine adenosyltransferase II, alpha                                                                        |
| 1435395_s_at | 0.000708421 | -2.6 | -3.5  | Atp5j2                               | ATP synthase, H+ transporting, mitochondrial F0 complex, subunit f, isoform 2                                   |
| 1448498_at   | 8.34E-10    | -2.6 | -3.5  | Rps6ka4                              | ribosomal protein S6 kinase, polypeptide 4                                                                      |
| 1429189_at   | 2.14E-12    | -2.6 | -2.7  | Arsb                                 | arylsulfatase B                                                                                                 |
| 1439815_at   | 2.47E-07    | -2.6 | -3.7  | Heatr5b                              | HEAT repeat containing 5B                                                                                       |
| 1419259_at   | 0.001682927 | -2.6 | -2.5  | Rsu1                                 | Ras suppressor protein 1                                                                                        |
| 1417420_at   | 2.91E-05    | -2.6 | -2.2  | Ccnd1                                | cyclin D1                                                                                                       |
| 1423917_a_at | 0.000156209 | -2.6 | -4.0  | Cttn                                 | cortactin                                                                                                       |
| 1416536_at   | 1.94E-07    | -2.6 | -6.6  | Mum1                                 | melanoma associated antigen (mutated) 1                                                                         |
| 1449303_at   | 0.001003    | -2.6 | -3.9  | Sesn3                                | Sestrin 3, mRNA (cDNA clone IMAGE:3481673)                                                                      |
| 1435649_at   | 0.00494507  | -2.7 | -3.7  | Nexn                                 | nexilin                                                                                                         |
| 1426015_s_at | 0.00403752  | -2.7 | -3.5  | Asph                                 | aspartate-beta-hydroxylase                                                                                      |
| 1424707_at   | 1.66E-13    | -2.7 | -2.4  | Tmed10                               | transmembrane emp24-like trafficking protein 10 (yeast)                                                         |
| 1416364_at   | 7.87E-06    | -2.7 | -3.0  | Hsp90ab1                             | heat shock protein 90 alpha (cytosolic), class B member 1                                                       |
| 1453572_a_at | 6.24E-16    | -2.7 | -3.1  | Plp2                                 | proteolipid protein 2                                                                                           |
| 1424828_a_at | 1.02E-05    | -2.7 | -3.3  | Fh1                                  | fumarate hydratase 1                                                                                            |
| 1425506_at   | 0.001272349 | -2.7 | -4.2  | Mylk                                 | myosin, light polypeptide kinase                                                                                |
| 1434037_s_at | 0.001115714 | -2.7 | -4.7  | Kat2b                                | K(lysine) acetyltransferase 2B                                                                                  |
| 1422438_at   | 4.05E-32    | -2.7 | -3.4  | Ephx1                                | epoxide hydrolase 1, microsomal                                                                                 |
| 1428647_at   | 2.57E-05    | -2.7 | -4.5  | LOC766870 /// Pbx1                   | 1 /// pre B-cell leukemia transcription factor 1                                                                |
| 1434123_at   | 0.000331308 | -2.7 | -3.9  | Fut11                                | fucosyltransferase 11                                                                                           |
| 1436824_x_at | 0.000139033 | -2.7 | -4.8  | Rnf26                                | ring finger protein 26                                                                                          |
| 1446618_at   | 0.000410051 | -2.7 | -2.5  | LOC432971                            | hypothetical gene supported by AK038224                                                                         |
| 1429739_a_at | 0.003995925 | -2.7 | -4.8  | Patz1                                | POZ (BTB) and AT hook containing zinc finger 1                                                                  |
| 1435652_a_at | 3.53E-09    | -2.7 | -4.1  | Gnai2                                | guanine nucleotide binding protein (G protein), alpha inhibiting 2                                              |
| 1418318_at   | 2.05E-07    | -2.7 | -3.8  | Rnf128                               | ring finger protein 128                                                                                         |
| 1434518_at   | 1.99E-09    | -2.8 | -3.2  | Phka2                                | phosphorylase kinase alpha 2                                                                                    |
| 1416217_a_at | 0.000175262 | -2.8 | -3.6  | 100042986 /// OTTMUSG00000001        | predicted gene, 100042986 /// predicted gene, OTTMUSG00000015874 /// ribosomal                                  |
| 1426690_a_at | 0.00036641  | -2.8 | -5.5  | 5874 /// Rpl37a                      | protein L37a                                                                                                    |
| 1435727_s_at | 5.51E-05    | -2.8 | -4.0  | Srebf1                               | sterol regulatory element binding transcription factor 1                                                        |
| 1424093_x_at | 1.67E-05    | -2.8 | -3.0  | Lima1                                | LIM domain and actin binding 1                                                                                  |
| 1450862_at   | 0.000214831 | -2.8 | -5.1  | Cd151                                | CD151 antigen                                                                                                   |
| 1428431_at   | 0.000287089 | -2.8 | -3.1  | Rad54l                               | RAD54 like (S. cerevisiae)                                                                                      |
| 1428432_at   | 0.002812726 | -2.8 | -5.6  | Zcchc24                              | zinc finger, CCHC domain containing 24                                                                          |
| 1438055_at   | 0.000925112 | -2.8 | -3.9  | Zcchc24                              | zinc finger, CCHC domain containing 24                                                                          |
| 1438200_at   | 0.00403752  | -2.8 | -6.2  | Rarres1                              | retinoic acid receptor responder (tazarotene induced) 1                                                         |
| 1436944_x_at | 3.76E-06    | -2.9 | -7.2  | Sulf1                                | sulfatase 1                                                                                                     |
| 1450388_s_at | 0.000432347 | -2.9 | -3.6  | 4933439C20Rik /// LOC236604 /// Pisd | RIKEN cDNA 4933439C20 gene /// phosphatidylserine decarboxylase pseudogene /// phosphatidylserine decarboxylase |
| 1460409_at   | 2.78E-06    | -2.9 | -5.3  | Twsg1                                | twisted gastrulation homolog 1 (Drosophila)                                                                     |
| 1426778_at   | 4.31E-05    | -2.9 | -4.5  | Cpt1a                                | carnitine palmitoyltransferase 1a, liver                                                                        |
| 1416365_at   | 0.003893228 | -2.9 | -4.1  | Dag1                                 | dystroglycan 1                                                                                                  |
| 1431375_s_at | 0.000610427 | -2.9 | -3.2  | Hsp90ab1                             | heat shock protein 90 alpha (cytosolic), class B member 1                                                       |
| 1454843_at   | 4.92E-05    | -2.9 | -4.3  | Parva                                | parvin, alpha                                                                                                   |
| 1449056_at   | 0.001729897 | -2.9 | -6.0  | Prps2                                | phosphoribosyl pyrophosphate synthetase 2                                                                       |
| 1438634_x_at | 4.64E-07    | -2.9 | -4.7  | E330009J07Rik                        | RIKEN cDNA E330009J07 gene                                                                                      |
| 1423667_at   | 0.003893228 | -2.9 | -3.1  | Lasp1                                | LIM and SH3 protein 1                                                                                           |
| 1417027_at   | 0.00071548  | -3.0 | -3.8  | Mat2a                                | methionine adenosyltransferase II, alpha                                                                        |
| 1453634_a_at | 0.004205942 | -3.0 | -6.2  | Trim2                                | tripartite motif-containing 2                                                                                   |
| 1416041_at   | 1.25E-11    | -3.0 | -2.8  | Erp29                                | endoplasmic reticulum protein 29                                                                                |
| 1455481_at   | 0.001318084 | -3.0 | -3.5  | Sgk1                                 | serum/glucocorticoid regulated kinase 1                                                                         |
| 1455789_x_at | 0.000504054 | -3.0 | -3.5  | Ilds                                 | iduronate 2-sulfatase                                                                                           |
| 1421654_a_at | 0.001469337 | -3.0 | -4.6  | Hspa8                                | heat shock protein 8                                                                                            |
| 1449147_at   | 0.000306735 | -3.1 | -10.7 | Lmna                                 | lamin A                                                                                                         |
| 1422445_at   | 1.24E-05    | -3.1 | -4.2  | Chst1                                | carbohydrate (keratan sulfate Gal-6) sulfotransferase 1                                                         |
| 1416000_a_at | 2.05E-06    | -3.1 | -3.0  | Itga6                                | integrin alpha 6                                                                                                |
| 1438386_x_at | 0.000959732 | -3.1 | -3.5  | Prdx1                                | peroxiredoxin 1                                                                                                 |
| 1437308_s_at | 1.41E-08    | -3.1 | -2.7  | Mat2a                                | methionine adenosyltransferase II, alpha                                                                        |
| 1434642_at   | 0.001342399 | -3.1 | -10.6 | F2r                                  | coagulation factor II (thrombin) receptor                                                                       |
| 1433582_at   | 3.01E-05    | -3.1 | -3.8  | Hsd17b11                             | hydroxysteroid (17-beta) dehydrogenase 11                                                                       |
| 1455470_x_at | 0.000174578 | -3.2 | -4.7  | 1190002N15Rik /// LOC100044725       | RIKEN cDNA 1190002N15 gene /// hypothetical protein LOC100044725                                                |
| 1450852_s_at | 0.000101116 | -3.2 | -2.6  | Lasp1                                | LIM and SH3 protein 1                                                                                           |
| 1451339_at   | 0.000302995 | -3.2 | -4.0  | F2r                                  | coagulation factor II (thrombin) receptor                                                                       |
| 1428789_at   | 0.003900553 | -3.2 | -4.0  | Suox                                 | sulfite oxidase                                                                                                 |
| 1434105_at   | 2.69E-14    | -3.2 | -4.0  | Ralqps2                              | CDNA clone IMAGE:6828107                                                                                        |
|              |             |      |       | Epm2aip1                             | EPM2A (laforin) interacting protein 1                                                                           |

|              |             |       |       |                                   |                                                                                                                       |
|--------------|-------------|-------|-------|-----------------------------------|-----------------------------------------------------------------------------------------------------------------------|
| 1454677_at   | 1.17E-06    | -3.2  | -2.2  | Timp2                             | tissue inhibitor of metalloproteinase 2                                                                               |
| 1423732_at   | 4.90E-08    | -3.2  | -5.0  | Tram1                             | translocating chain-associating membrane protein 1                                                                    |
| 1422906_at   | 2.85E-06    | -3.2  | -3.0  | Abcg2                             | ATP-binding cassette, sub-family G (WHITE), member 2                                                                  |
| 1428801_at   | 3.12E-08    | -3.3  | -3.4  | Mgat3                             | mannoside acetylglucosaminyltransferase 3                                                                             |
| 1420836_at   | 6.42E-14    | -3.3  | -2.8  | Slc25a30                          | solute carrier family 25, member 30                                                                                   |
| 1438630_x_at | 1.24E-09    | -3.4  | -3.9  | Mat2a                             | methionine adenosyltransferase II, alpha                                                                              |
| 1449145_a_at | 5.79E-20    | -3.4  | -1.8  | Cav1                              | caveolin 1, caveolae protein                                                                                          |
| 1448433_a_at | 6.92E-09    | -3.4  | -3.7  | Pcolce                            | procollagen C-endopeptidase enhancer protein                                                                          |
| 1453304_s_at | 0.002088512 | -3.5  | -8.6  | Ly6e                              | lymphocyte antigen 6 complex, locus E                                                                                 |
| 1416269_at   | 0.001378328 | -3.5  | -4.4  | Atp5j2                            | ATP synthase, H+ transporting, mitochondrial F0 complex, subunit f, isoform 2                                         |
| 1448354_at   | 1.68E-06    | -3.5  | -7.1  | G6pdx                             | glucose-6-phosphate dehydrogenase X-linked                                                                            |
| 1417056_at   | 0.000197013 | -3.5  | -7.7  | Psme1                             | proteasome (prosome, macropain) 28 subunit, alpha                                                                     |
| 1429089_s_at | 1.54E-07    | -3.5  | -5.5  | 2900026A02Rik<br>LOC100046044 /// | RIKEN cDNA 2900026A02 gene                                                                                            |
| 1418157_at   | 0.001878537 | -3.5  | -6.1  | Nr2f1                             | similar to COUP-TFI /// nuclear receptor subfamily 2, group F, member 1                                               |
| 1457446_at   | 0.000664946 | -3.5  | -3.4  | Opcml                             | opioid binding protein/cell adhesion molecule-like                                                                    |
| 1433576_at   | 3.48E-10    | -3.6  | -3.8  | Mat2a                             | methionine adenosyltransferase II, alpha                                                                              |
| 1415984_at   | 0.00071548  | -3.6  | -6.5  | Acadm                             | acyl-Coenzyme A dehydrogenase, medium chain                                                                           |
| 1428082_at   | 5.65E-15    | -3.6  | -4.0  | Acsf5                             | acyl-CoA synthetase long-chain family member 5                                                                        |
| 1452037_at   | 0.000123779 | -3.6  | -4.8  | Mgat2                             | mannoside acetylglucosaminyltransferase 2                                                                             |
| 1448533_at   | 0.003708743 | -3.6  | -6.3  | Tbcb                              | tubulin folding cofactor B                                                                                            |
| 1416868_at   | 0.004984825 | -3.6  | -7.2  | Cdkn2c                            | cyclin-dependent kinase inhibitor 2C (p18, inhibits CDK4)                                                             |
| 1415770_at   | 5.51E-05    | -3.7  | -7.3  | Wdr6                              | WD repeat domain 6                                                                                                    |
| 1415818_at   | 0.00048696  | -3.7  | -6.8  | Anxa6                             | annexin A6                                                                                                            |
| 1423712_a_at | 1.00E-06    | -3.7  | -5.8  | Qars                              | glutaminyl-tRNA synthetase                                                                                            |
| 1433504_at   | 0.000271796 | -3.7  | -4.9  | Pyqb                              | brain glycogen phosphorylase                                                                                          |
| 1428795_at   | 0.00473922  | -3.7  | -7.6  | 1110021L09Rik                     | RIKEN cDNA 1110021L09 gene                                                                                            |
| 1433770_at   | 2.58E-12    | -3.7  | -4.1  | Dpysl2                            | dihydropyrimidinase-like 2                                                                                            |
| 1424829_at   | 8.32E-08    | -3.8  | -6.0  | A830007P12Rik                     | RIKEN cDNA A830007P12 gene                                                                                            |
| 1424157_at   | 0.000377997 | -3.8  | -3.7  | Ehd2                              | EH-domain containing 2                                                                                                |
| 1437760_at   | 2.00E-05    | -3.8  | -9.8  | Galnt12                           | UDP-N-acetyl-alpha-D-galactosamine:polypeptide N-acetylglucosaminyltransferase 12                                     |
| 1423790_at   | 0.001185864 | -3.8  | -4.8  | Dap                               | death-associated protein                                                                                              |
| 1429390_at   | 0.000118364 | -3.8  | -7.5  | Acpl2                             | acid phosphatase-like 2                                                                                               |
| 1460173_at   | 5.24E-08    | -3.9  | -5.5  | Lasp1                             | LIM and SH3 protein 1                                                                                                 |
| 1416167_at   | 7.37E-06    | -3.9  | -4.1  | Prdx4                             | peroxiredoxin 4                                                                                                       |
| 1433581_at   | 8.86E-15    | -3.9  | -5.2  | 1190002N15Rik ///                 | RIKEN cDNA 1190002N15 gene /// hypothetical protein LOC100044725                                                      |
| 1436029_at   | 1.23E-05    | -4.0  | -7.4  | Bicc1                             | bicaudal C homolog 1 (Drosophila)                                                                                     |
| 1435972_at   | 2.00E-05    | -4.1  | -10.0 | Cast                              | calpastatin                                                                                                           |
| 1456735_x_at | 0.000862222 | -4.1  | -7.9  | Acpl2<br>LOC100044161 ///         | acid phosphatase-like 2<br>hypothetical protein LOC100044161 /// sema domain, immunoglobulin domain (Ig), short       |
| 1420416_at   | 0.003720204 | -4.1  | -5.2  | Sema3a                            | basic domain, secreted, (semaphorin) 3A                                                                               |
| 1416256_a_at | 7.73E-14    | -4.1  | -6.0  | Tubb5                             | tubulin, beta 5                                                                                                       |
| 1416044_at   | 3.29E-13    | -4.1  | -6.0  | Flii                              | flightless I homolog (Drosophila)                                                                                     |
| 1435785_at   | 4.72E-06    | -4.3  | -5.7  | Ehd2                              | EH-domain containing 2                                                                                                |
| 1433751_at   | 1.22E-09    | -4.3  | -8.1  | Slc39a10                          | solute carrier family 39 (zinc transporter), member 10                                                                |
| 1452861_at   | 0.000870975 | -4.3  | -8.7  | 2010300C02Rik                     | RIKEN cDNA 2010300C02 gene                                                                                            |
| 1424130_a_at | 0.00081903  | -4.3  | -6.1  | Ptrf                              | polymerase I and transcript release factor                                                                            |
| 1450641_at   | 4.07E-11    | -4.4  | -2.2  | Vim                               | vimentin                                                                                                              |
| 1450920_at   | 0.002569922 | -4.5  | -5.8  | Ccnb2                             | cyclin B2                                                                                                             |
| 1433825_at   | 0.000352248 | -4.6  | -7.1  | Ntrk3                             | neurotrophic tyrosine kinase, receptor, type 3                                                                        |
| 1455160_at   | 2.85E-05    | -4.6  | -5.1  | 2610203C20Rik                     | RIKEN cDNA 2610203C20 gene                                                                                            |
| 1418840_at   | 0.000479267 | -4.7  | -7.4  | Pdcd4                             | programmed cell death 4                                                                                               |
| 1426369_at   | 0.000247398 | -4.8  | -6.6  | Far1                              | fatty acyl CoA reductase 1                                                                                            |
| 1450062_a_at | 1.17E-06    | -4.8  | -10.1 | Maged1<br>LOC100044161 ///        | melanoma antigen, family D, 1<br>hypothetical protein LOC100044161 /// sema domain, immunoglobulin domain (Ig), short |
| 1449865_at   | 2.91E-05    | -4.8  | -5.0  | Sema3a                            | basic domain, secreted, (semaphorin) 3A                                                                               |
| 1416967_at   | 0.002074175 | -4.9  | -5.1  | Sox2                              | SRY-box containing gene 2                                                                                             |
| 1460184_at   | 1.21E-07    | -5.3  | -7.1  | Hadh                              | hydroxyacyl-Coenzyme A dehydrogenase                                                                                  |
| 1415822_at   | 7.16E-05    | -5.4  | -8.2  | Scd2                              | stearoyl-Coenzyme A desaturase 2                                                                                      |
| 1455940_x_at | 0.00077498  | -5.5  | -19.9 | Wdr6                              | WD repeat domain 6                                                                                                    |
| 1455972_x_at | 2.44E-08    | -5.6  | -11.2 | Hadh                              | hydroxyacyl-Coenzyme A dehydrogenase                                                                                  |
| 1459823_at   | 2.13E-05    | -5.8  | -9.0  | Ehd2                              | EH-domain containing 2                                                                                                |
| 1420622_a_at | 2.33E-07    | -6.1  | -8.1  | Hspa8                             | heat shock protein 8                                                                                                  |
| 1420623_x_at | 1.24E-08    | -6.2  | -7.5  | Hspa8                             | heat shock protein 8                                                                                                  |
| 1456393_at   | 0.000343872 | -6.3  | -8.8  | 2310002J21Rik                     | RIKEN cDNA 2310002J21 gene                                                                                            |
| 1423642_at   | 0.000197013 | -6.6  | -8.2  | Tubb2c                            | tubulin, beta 2c                                                                                                      |
| 1438195_at   | 0.000143685 | -7.0  | -10.5 | Gpd1l                             | glycerol-3-phosphate dehydrogenase 1-like                                                                             |
| 1417852_x_at | 1.80E-07    | -7.1  | -4.3  | Clca1                             | chloride channel calcium activated 1                                                                                  |
| 1460259_s_at | 2.24E-11    | -7.7  | -5.9  | Clca1 /// Clca2                   | chloride channel calcium activated 1 /// chloride channel calcium activated 2                                         |
| 1455719_at   | 3.24E-06    | -7.7  | -8.6  | Tubb5                             | tubulin, beta 5                                                                                                       |
| 1436528_at   | 0.001202866 | -9.0  | -18.5 | Kazald1                           | Kazal-type serine peptidase inhibitor domain 1                                                                        |
| 1425789_s_at | 7.90E-12    | -11.1 | -13.5 | Anxa8                             | annexin A8                                                                                                            |
| 1416326_at   | 3.05E-14    | -23.2 | -70.6 | Crip1                             | cysteine-rich protein 1 (intestinal)                                                                                  |

A subset of 434 of the 695 transcripts shown in Table S4 are also differentially expressed after infecting mGEPs with the cancer-associated *H. pylori* isolate.

**Table S6. IPA analysis of biological functions (A) and signaling/metabolic pathways (B) that were significantly over-represented in the 695-member 'shared ChAG-signature' mGEP response.**

**Table S6A.**

| Category                                      | P-value           | Molecules                                                                                                                                                                                                                                                                                                                                                                                                                                                                                                                                                                                                                                                                                                                                                                                                                                                                                                                                                                                                                                                                                                                                                                                                                                                                                                                                                                                                                                                                                                                                                                                                                                                                                                                                                                                                                                                                                                                                                                                                                                                                                                                                                                                                                                                                                                                                                                                                                                                                                                                                                                                                                                                                                                                                                                              |
|-----------------------------------------------|-------------------|----------------------------------------------------------------------------------------------------------------------------------------------------------------------------------------------------------------------------------------------------------------------------------------------------------------------------------------------------------------------------------------------------------------------------------------------------------------------------------------------------------------------------------------------------------------------------------------------------------------------------------------------------------------------------------------------------------------------------------------------------------------------------------------------------------------------------------------------------------------------------------------------------------------------------------------------------------------------------------------------------------------------------------------------------------------------------------------------------------------------------------------------------------------------------------------------------------------------------------------------------------------------------------------------------------------------------------------------------------------------------------------------------------------------------------------------------------------------------------------------------------------------------------------------------------------------------------------------------------------------------------------------------------------------------------------------------------------------------------------------------------------------------------------------------------------------------------------------------------------------------------------------------------------------------------------------------------------------------------------------------------------------------------------------------------------------------------------------------------------------------------------------------------------------------------------------------------------------------------------------------------------------------------------------------------------------------------------------------------------------------------------------------------------------------------------------------------------------------------------------------------------------------------------------------------------------------------------------------------------------------------------------------------------------------------------------------------------------------------------------------------------------------------------|
| Cell Death                                    | 5.07E-07-1.52E-02 | MAGED1, CREM, TGFBR1, F2R, SGK1, CDKN2C, IDE, CCND1, ODC1, MYLK, PEM, HNRNPA1, MXD3, SOD2, MADD, CAV1, ATF4, SMG1, VAPB, TXN, SERPINE1, TIMP2, ETS1, ATG7, NDRG1, ITGA6, TBK1, CSF3, HSPA8, NR1D1, ST3GAL1, HTT, RAD18, RUNX1, EPHX1, PRDX2, GADD45B, PRDX1, CNTF, CTNNA1, CASP4, OARS, SGMS1, PTMA, RASSF1, RNPS1, HSP90AB1, MXD1, BRD4, HLA-B, FGF7, KHDRBS1, ABCG2, TRIM28, MMP10, TIAL1, REV3L, P2RX7, DLC1, GGT1, PRKCG, KITLG, SEMA3A, KLF7, NTRK3, ZEB2, RIPK3, FEN1, TXNDC17, PPARGC1A, PHLDA1, IL15RA, JAK1, LIF, PTPN23, MMP13, TUBB, PLA2G7, CDK5R1, NR2F1, USP7, RPS3A, CAMK2D, AIRE, PIM1, FOSL2, DAG1, CAST, PMAIP1, SLC6A8, PTPRE, FST, DNASE2, YWHAB, BACE1, RAD54L, ABCB1B, BUB1B, MLL, INHBA, RCAN1, PDGFB, CBLB, KAT2B, PTPN11, CD40, NUAQ1, TMSB10, CDKL3, SULF1, S100A6, CDC20, ITM2B, ETS2, NGF, PHKA2, PDCD4, MGAT3, HMOX1, NFKBIA, SDC2, PLK2, FOXO3, VCP, SMO, SMOX, RPS3, CHEK2, PLSCR1, FAAH, DAP, PARVA, SLC25A4, NLRP3, CROP, G6PD, GLUD1, IKBKE, BCL3, EMP1, PRKAR2B, NDUFV2, PPIA (includes EG:268373), EEF1A1, SKIL, TOPORS, CXCL2, CASP8A2, RNF139, DPYSL2, MAGED1, TGFBR1, CREM, EIF1, CCNB2, DNAJC3, CCND1, ODC1, SOD2, MADD, GLB1, CAV1, SERPINE1, ETS1, CLCA1 (includes EG:12722), ITGA6, ANO6, TBK1, HSPA8, ST3GAL1, RAD18, RPS25, RNF139, DPYSL2, MAGED1, TGFBR1, CREM, EIF1, CCNB2, DNAJC3, CCND1, ODC1, SOD2, MADD, GLB1, CAV1, SERPINE1, ETS1, CLCA1 (includes EG:12722), ITGA6, ANO6, TBK1, HSPA8, ST3GAL1, RAD18, RPS25, RUNX1, PRDX2, EPHX1, GADD45B, PRDX1, CNTF, PTPN14, HSD17B11, RASSF1, HSP90AB1, MXD1, BICC1, LY6E, ASPH, OPRS1, TUBB2C, ABCG2, VIM, CPEB4, MCM3, SEMA3A, BAT1, DLEU2, NTRK3, TXNDC17, CSRP3, IL15RA, LIF, JAK1, MMP13, MAP4K4, PVR, SOX2, BDH1, PIM1, CAST, PGLYRP2, KCNK2, OVGP1, PDE4B, BUB1B, MLL, PDGFB, PIP5K1A, PTPN11, TMSB10, CD151, CDKL3, DCBLD2, SULF1, S100A6, CDC20, ADH1C (includes EG:126), ETS2, PHKA2, MGAT3, SDC2, FOXO3, LASP1, PARVA, NLRP3, PSRC1, G6PD, RPL23, NDUFV2, PPIA (includes EG:268373), CXXC5, SKIL, CXCL2, IVD, MALAT1, PRIM1, ATP6V0C, F2R, RSG1, CDKN2C, RPS11, PCOLCE, MYLK, HRH1, HNRNPA1, MXD3, SMG1, TXN, TIMP2, ATG7, NDRG1, PTCH1, CSF3, C10ORF81, NEDD4, CLCN5, HTT, RSU1, FH, STX3, SRD5A1, CASP4, SGMS1, PTMA, PRRX1, HLA-B, MASP1, FGF7, TRIM28, MMP10, P2RX7, REV3L, DLC1, GGT1, PRKCG, KITLG, SREBF1, ZEB2, RIPK3, ADAM10, FEN1, RPL11, PTPN23, PBX1, TUBB, PLA2G7, CDK5R1, NR2F1, USP7, RPS3A, CAMK2D, CRIP1, SDPR, COMT, ACSL5, C9ORF167, CHD1 (includes EG:1105), NEO1, PMAIP1, PTPRE, FST, PDE10A, PPIG, OPCML, INHBA, DDX17, RCAN1, KAT2B, WHSC1L1, CD40, SF1, NUAQ1, CTTN, FLRT2, TRAM1, RARRS1, NGF, PDCD4, HMOX1, NFKBIA, PLK2, RPS16, VCP, SMO, MICALL1, NEK7, SMOX, CHEK2, GLUD1, BCL3, IKBKE, GNAI2, EMP1, PRKAR2B, EEF1A1, FLII, MAT2A, SLC7A3, CASP8A2 |
| Cancer                                        | 6.05E-07-1.75E-02 | DPYSL2, SULF1, TGFBR1, LIF, PRDX1, SGK1, CDKN2C, TUBB, NGF, CCND1, CDK5R1, PTMA, NR2F1, USP7, MADD, NFKBIA, CAMK2D, SOD2, AIRE, GLB1, MXD1, FOXO3, CAV1, HLA-B, SAFB, CHEK2, ETS1, PSRC1, ABCG2, ABCB1B, CBLB, ZNF423, SEMA3A, PRKAR2B, CD40, NTRK3, RSU1, PPARGC1A                                                                                                                                                                                                                                                                                                                                                                                                                                                                                                                                                                                                                                                                                                                                                                                                                                                                                                                                                                                                                                                                                                                                                                                                                                                                                                                                                                                                                                                                                                                                                                                                                                                                                                                                                                                                                                                                                                                                                                                                                                                                                                                                                                                                                                                                                                                                                                                                                                                                                                                    |
| Cellular Function and Maintenance             | 1.44E-06-1.52E-02 | MAGED1, TGFBR1, CREM, DUSP8, F2R, SGK1, EIF1, DNAJC3, CDKN2C, COL8A1, POLM, CCND1, RPS15A, ODC1, FADS3, ZBTB17, HRH1, NR4A3, HNRNPA1, MXD3, SOD2, MADD, CAV1, ATF4, SAFB, TXN, SERPINE1, TIMP2, ETS1, NDRG1, CLCA1 (includes EG:12722), PTCH1, ITGA6, CSF3, MAFF, RPS4X, PATZ1, NR1D1, HTT, ANAPC5, RUNX1, PRDX2, PIM3, GADD45B, PRDX1, CNTF, PRDX4, PTPN14, CTNNA1, H2AFZ, SGMS1, PTMA, MAFG, SEC61A1, RASSF1, PRRX1, MXD1, BRD4, LY6E, ASPH, FGF7, NRP2, KHDRBS1, TRIM28, VIM, TIAL1, P2RX7, DLC1, GGT1, MCM3, KITLG, SEMA3A, SREBF1, NDE1, NTRK3, TBC1D8, ZEB2, ADAM10, CSRP3, PER1, PHLDA1, IL15RA, LIF, JAK1, PBX1, ATP5G2, MAP4K4, CDK5R1, MTTP, PVR, SOX2, USP7, CD164, RPS3A, CRIP1, PIM1, COMT, ACSL5, NEO1, FOSL2, CAST, PMAIP1, PTPRE, FST, GABPB2, KCNK2, LMNA, RPL23A (includes EG:6147), BUB1B, ATAD2, DDX17, PDGFB, INHBA, MLL, RCAN1, CBLB, KAT2B, PTPN11, CD40, SF1, TMSB10, LITAF, S100A6, LILRB4 (includes EG:11006), ETS2, RARRS1, NGF, WDR6 (includes EG:11180), MGAT3, HMOX1, DHCR7, NFKBIA, SDC2, PLK2, FOXO3, SMO, SMOX, CHEK2, PLSCR1, DAP, PSRC1, CHERP, G6PD, ERO1L, IKBKE, BCL3, EMP1, GNAI2, PRKAR2B, PPIA (includes EG:268373), CORO1A, SKIL, TOPORS, CXCL2                                                                                                                                                                                                                                                                                                                                                                                                                                                                                                                                                                                                                                                                                                                                                                                                                                                                                                                                                                                                                                                                                                                                                                                                                                                                                                                                                                                                                                                                                                                                                                                              |
| Cellular Growth and Proliferation             | 1.48E-05-1.68E-02 | DPYSL2, MAGED1, CREM, F2R, TOM1, SGK1, CDKN2C, IDE, HRH1, MADD, MXD3, SOD2, GLB1, RNASET2, VAPB, TXN, SERPINE1, ATG7, NDRG1, TKT, PTCH1, CSF3, MAFF, HSPA8, ZNF423, RPS4X, NR1D1, HTT, RUNX1, PRDX2, PRDX1, SRD5A1, CNTF, CA13, CTNNA1, RPL31, CASP4, PTMA, MAFG, SEC61A1, HLA-B, ASPH, OPRS1, TUBB2C, VIM, P2RX7, PRKCG, KITLG, SEMA3A, PSME1, KLF7, NPTN, NTRK3, ABCG2, SREBF1, NDE1, ZEB2, PPARGC1A, IL15RA, LIF, PLA2G7, CDK5R1, NR2F1, SOX2, RPS3A, COMT, GABARAPL1, CAST, DAG1, PMAIP1, CPT1A, YWHAB, PDE10A, GM2A, ZNF624, ENO2, RAD54L, LMNA, BACE1, PDE4B, TUBA1B, ATAD2, PDGFB, CBLB, ATP5C1, CD40, LITAF, FLRT2, ITM2B, ADH1C (includes EG:126), TRAM1, NGF, HMOX1, DHCR7, NFKBIA, PLK2, FOXO3, MICALL1, ACADM, IER5, SLC25A4, SCD2, G6PD, GLUD1, PRKAR2B, NDUFV2, TMED10, PPIA (includes EG:268373), EEF1A1, CXCL2, HADH                                                                                                                                                                                                                                                                                                                                                                                                                                                                                                                                                                                                                                                                                                                                                                                                                                                                                                                                                                                                                                                                                                                                                                                                                                                                                                                                                                                                                                                                                                                                                                                                                                                                                                                                                                                                                                                                                                                                                   |
| Neurological Disease                          | 1.6E-05-1.75E-02  | MRC1, JAK1, TGFBR1, CREM, F2R, PBX1, MAP4K4, IDE, CCND1, CDK5R1, MTTP, HRH1, NR4A3, MADD, SOD2, TXN, PMAIP1, SERPINE1, ETS1, ATG7, PTCH1, ITGA6, BACE1, TBK1, ABCB1B, CSF3, MAFF, PDGFB, CBLB, KAT2B, CD40, PTPN11, HTT, CNTF, ADH1C (includes EG:126), ETS2, TWSG1, MAFG, HMOX1, NFKBIA, HSP90AB1, FOXO3, BRD4, LY6E, ASPH, FGF7, NRP2, MAN2A1, IKBKE, PISD, REV3L, GGT1, ABCG2, SREBF1, NTRK3, TMED10, FLII, SKIL, CXCL2                                                                                                                                                                                                                                                                                                                                                                                                                                                                                                                                                                                                                                                                                                                                                                                                                                                                                                                                                                                                                                                                                                                                                                                                                                                                                                                                                                                                                                                                                                                                                                                                                                                                                                                                                                                                                                                                                                                                                                                                                                                                                                                                                                                                                                                                                                                                                             |
| Organismal Survival                           | 2.6E-05-3.99E-03  | CREM, LIF, F2R, SGK1, CNTF, CDKN2C, NGF, CCND1, HMOX1, NR4A3, HNRNPA1, RASSF1, NFKBIA, BRSK1, COMT, VCP, FOXO3, CAV1, PMAIP1, FGF7, CHEK2, TIMP2, PTPRE, RAD54L, OVGP1, BCL3, CSF3, PDGFB, INHBA, GNAI2, KITLG, PTPN11, CD40, NTRK3, FEN1, TOPORS                                                                                                                                                                                                                                                                                                                                                                                                                                                                                                                                                                                                                                                                                                                                                                                                                                                                                                                                                                                                                                                                                                                                                                                                                                                                                                                                                                                                                                                                                                                                                                                                                                                                                                                                                                                                                                                                                                                                                                                                                                                                                                                                                                                                                                                                                                                                                                                                                                                                                                                                      |
| DNA Replication, Recombination, and Repair    | 9.29E-05-4.49E-03 | RPL11, MAGED1, LIF, CREM, SGK1, CDKN2C, TUBB, CCND1, RPS15A, PVR, SOX2, NR4A3, ZBTB17, MADD, MXD3, SOD2, CAMK2D, PIM1, BRSK1, CAV1, FOSL2, CAST, TXN, TIMP2, LMNA, RAD54L, CSF3, BUB1B, MLL, INHBA, HSPA8, KAT2B, CD40, PTPN11, RAD18, ANAPC5, SNF1LK, RUNX1, SULF1, JARID1B, GADD45B, CDC20, NGF, WDR6 (includes EG:11180), HMOX1, NFKBIA, RASSF1, SDC2, PLK2, FOXO3, MXD1, BRD4, FGF7, CHEK2, PSRC1, KHDRBS1, TIAL1, RPL23, BCL3, KITLG, GNAI2, NTRK3, NDE1, SKIL                                                                                                                                                                                                                                                                                                                                                                                                                                                                                                                                                                                                                                                                                                                                                                                                                                                                                                                                                                                                                                                                                                                                                                                                                                                                                                                                                                                                                                                                                                                                                                                                                                                                                                                                                                                                                                                                                                                                                                                                                                                                                                                                                                                                                                                                                                                    |
| Cell Cycle                                    | 1.03E-04-1.75E-02 | DPYSL2, MAGED1, TGFBR1, F2R, DNAJC3, CCND1, POLM, ODC1, NR4A3, HRH1, SOD2, CAV1, ATF4, SAFB, SERPINE1, AMHR2, TIMP2, ETS1, NDRG1, ITGA6, CSF3, MAFF, ZNF423, PATZ1, NR1D1, HTT, RUNX1, PRDX2, PIM3, GADD45B, CNTF, PTPN14, CTNNA1, TWSG1, H2AFZ, PTMA, MAFG, RASSF1, PTGFRN, MXD1, BRD4, FGF7, OPRS1, NRP2, KHDRBS1, ABCG2, TIAL1, P2RX7, DLC1, KITLG, SEMA3A, NTRK3, SREBF1, ADAM10, CHD7, CSRP3, PPARGC1A, IL15RA, LIF, JAK1, PBX1, CBX3, MMP13, MAP4K4, CDK5R1, PVR, NR2F1, SOX2, CD164, RPS3A, AIRE, PIM1, BRSK1, CHD1 (includes EG:1105), FOSL2, CAST, DAG1, FST, DNASE2, FBXL10, LMNA, PDGFB, INHBA, MLL, RCAN1, KAT2B, PIP5K1A, PTPN11, CD40, SF1, CTTN, CD151, S100A6, ETS2, NGF, DHCR7, NFKBIA, FOXO3, SMO, ACADM, PLSCR1, PARVA, VEZF1, AP3D1, G6PD, BCL3, PRKAR2B, PPIA (includes EG:268373), CORO1A, SKIL, VGF, CXCL2                                                                                                                                                                                                                                                                                                                                                                                                                                                                                                                                                                                                                                                                                                                                                                                                                                                                                                                                                                                                                                                                                                                                                                                                                                                                                                                                                                                                                                                                                                                                                                                                                                                                                                                                                                                                                                                                                                                                                      |
| Cellular Development                          | 1.03E-04-1.67E-02 | IL15RA, LIF, ITGA6, PBX1, ETS2, CSF3, CCND1, MLL, INHBA, MAFG, KITLG, HRH1, SEMA3A, PTPN11, CD40, FOXO3, MXD1, SMO, ATF4, RUNX1, PLSCR1, TIMP2                                                                                                                                                                                                                                                                                                                                                                                                                                                                                                                                                                                                                                                                                                                                                                                                                                                                                                                                                                                                                                                                                                                                                                                                                                                                                                                                                                                                                                                                                                                                                                                                                                                                                                                                                                                                                                                                                                                                                                                                                                                                                                                                                                                                                                                                                                                                                                                                                                                                                                                                                                                                                                         |
| Hematopoiesis                                 | 1.03E-04-1.67E-02 | PRIM1, STRN, JAK1, LIF, F2R, AC02, PBX1, NEXN, TUBB, CCND1, CDK5R1, NR4A3, RPS3A, SOD2, CAMK2D, COMT, ABCB8, CAV1, CHD1 (includes EG:1105), ATF4, FOSL2, TXN, SERPINE1, TIMP2, STX11, ETS1, CPT1A, DNASE2, NONO, TKT, PDE4B, CSF3, MLL, INHBA, PDGFB, ZNF423, CD40, PTPN11, RUNX1, CD151, CDC20, PRDX1, TWSG1, HMOX1, NFKBIA, FOXO3, ACADM, CHEK2, PLSCR1, OPRS1, NRP2, G6PD, GLUD1, BCL3, MAN2A1, KITLG, PRKAR2B, ANXA6, SREBF1, ADAM10, FEN1, PPARGC1A                                                                                                                                                                                                                                                                                                                                                                                                                                                                                                                                                                                                                                                                                                                                                                                                                                                                                                                                                                                                                                                                                                                                                                                                                                                                                                                                                                                                                                                                                                                                                                                                                                                                                                                                                                                                                                                                                                                                                                                                                                                                                                                                                                                                                                                                                                                               |
| Hematological Disease                         | 1.23E-04-1.38E-02 | MAGED1, PRIM1, TGFBR1, CREM, JMJD3, F2R, SGK1, CDKN2C, BAZ1A, CCND1, PEM, ZBTB17, NR4A3, HNRNPA1, MXD3, SOD2, CAV1, ATF4, SMARCC2 (includes EG:6601), SAFB, TXN, SERPINE1, AMHR2, ETS1, FOXH1, ITGA6, TBK1, CSF3, MAFF, ZNF423, PATZ1, NR1D1, SNF1LK, RUNX1, PRDX1, PRDX4, CNTF, PTMA, SEC61A1, RNPS1, PRRX1, MXD1, BTA1F, FGF7, KHDRBS1, TRIM28, TIAL1, KLF7, NTRK3, SREBF1, PTRF, PPARGC1A, PER1, JAK1, LIF, MGA (includes EG:23269), PBX1, CBX3, MAP4K4, SOX2, NR2F1, CAMK2D, PIM1, CHD2, NEO1, FOSL2, CHD1 (includes EG:1105), FST, YWHAB, RAD54L, LMNA, OVGP1, RCAN1, MLL, DDX17, INHBA, KAT2B, CD40, PTPN11, SF1, JARID1B, LITAF, GLIS3, ETS2, NGF, PDCD4, RPL6, NFKBIA, PLK2, FOXO3, NFRKB, VEZF1, NLRP3, SCD2, HIVEP3, AXUD1, IKBKE, BCL3, CHST1, PRKAR2B, PPIA (includes EG:268373), FLII, RPS6KA4, RDH5, TOPORS, SKIL, CXCL2, GARNL1                                                                                                                                                                                                                                                                                                                                                                                                                                                                                                                                                                                                                                                                                                                                                                                                                                                                                                                                                                                                                                                                                                                                                                                                                                                                                                                                                                                                                                                                                                                                                                                                                                                                                                                                                                                                                                                                                                                                         |
| Gene Expression                               | 1.25E-04-1.71E-02 | RNF139, DPYSL2, MAGED1, TGFBR1, ACCN3, EIF1, COL8A1, CCNB2, CCND1, ODC1, SOD2, GLB1, CAV1, RNASET2, SAFB, SERPINE1, AMHR2, ETS1, ITGA6, ANO6, MAFF, HSPA8, RUNX1, PRDX2, EPHX1, SEPNI1 (includes EG:57190), ANAPC2, GADD45B, PRDX1, CNTF, HSD17B11, RASSF1, HSP90AB1, BICC1, LY6E, ASPH, OPRS1, TUBB2C, ABCG2, SLC25A3, VIM, CPEB4, MCM3, SEMA3A, DLEU2, NTRK3, CSRP3, PPARGC1A, IL15RA, LIF, MMP13, MAP4K4, SOX2, PIM1, ABCB8, CPT1A, YWHAB, GM2A, KCNK2, RAD54L, BACE1, PDE4B, BUB1B, ATAD2, TUBA1B, MLL, PDGFB, CBLB, ATP5C1, PTPN11, CRTAP, PRCP, MGAT2, SUOX, SLC11A1, CD151, S100A6, LITAF, GLIS3, CDC20, ADH1C (includes EG:126), DHCR7, RPS3, IER5, LASP1, NLRP3, SCD2, G6PD, AKAP2, NDUFV2, TMED10, PPIA (includes EG:268373), CXCL2, IVD, HADH, MALAT1, MRC1, PRIM1, TOM1, F2R, SGK1, CDKN2C, IDE, RPS11, HRH1, NR4A3, HNRNPA1, KIF21A, VAPB, TXN, TIMP2, CTNS, NDRG1, TKT, PTCH1, CSF3, CLCN5, RPS4X, CLEC4E, NR1D1, CD68, HTT, FH, SRD5A1, CA13, CTNNA1, RPL31, CASP4, TWSG1, PTMA, SEC61A1, HLA-B, FGF7, MMP10, P2RX7, GGT1, PRKCG, KITLG, PSME1, NPTN, SREBF1, NDE1, GPD1L, ZEB2, FEN1, CHD7, PER1, TUBB, PLA2G7, CDK5R1, MTTP, RPS3A, CRIP1, AIRE, COMT, STX11, SLC6A8, FST, NONO, PDE10A, OPCML, ENO2, ZNF624, LMNA, MUT, WHSC1L1, CD40, RLH2, SF1, ITM2B, FLRT2, LILRB4 (includes EG:11006), TRAM1, NGF, PDCD4, HMOX1, NFKBIA, PLK2, VCP, SMO, MICALL1, ARSB, ACADM, CHEK2, FAAH, SLC25A4, GLUD1, ZNF469, MAN2A1, GNAI2, PRKAR2B, EEF1A1, RDH5, TOPORS, VGF                                                                                                                                                                                                                                                                                                                                                                                                                                                                                                                                                                                                                                                                                                                                                                                                                                                                                                                                                                                                                                                                                                                                                                                                                                                                                                           |
| Genetic Disorder                              | 1.51E-04-8.9E-03  | DPYSL2, LIF, DGKD (includes EG:8527), TGFBR1, SGK1, IDE, RICTOR, TUBB, CDK5R1, ATG9B, PVR, MADD, SOD2, CAMK2D, EHD2, CAV1, NEO1, DAG1, CAST, SERPINE1, ACAP1, MTSS1, PTCH1, ITGA6, LMNA, BACE1, INHBA, PDGFB, PTPN11, HTT, LIMA1, CTTN, TMSB10, ANXA13, TGNL2 (includes EG:10618), NGF, RASSF1, SDC2, STMN4, SMO, FGF7, LASP1, PARVA, PSRC1, NRP2, PACSIN2, VIM, MAN2A1, P2RX7, DLC1, KITLG, SEMA3A, ANXA6, NTRK3, CORO1A, EEF1A1, FLII, PPARGC1A                                                                                                                                                                                                                                                                                                                                                                                                                                                                                                                                                                                                                                                                                                                                                                                                                                                                                                                                                                                                                                                                                                                                                                                                                                                                                                                                                                                                                                                                                                                                                                                                                                                                                                                                                                                                                                                                                                                                                                                                                                                                                                                                                                                                                                                                                                                                      |
| Cellular Assembly and Organization            | 1.59E-04-1.62E-02 | IL15RA, LIF, PBX1, ETS2, NGF, CCND1, MAFG, HRH1, NFKBIA, AIRE, PIM1, FOXO3, MXD1, SMO, HLA-B, ATF4, PLSCR1, IKBKE, P2RX7, CSF3, MLL, INHBA, GNAI2, KITLG, CBLB, CD40, PTPN11, RUNX1, CXCL2                                                                                                                                                                                                                                                                                                                                                                                                                                                                                                                                                                                                                                                                                                                                                                                                                                                                                                                                                                                                                                                                                                                                                                                                                                                                                                                                                                                                                                                                                                                                                                                                                                                                                                                                                                                                                                                                                                                                                                                                                                                                                                                                                                                                                                                                                                                                                                                                                                                                                                                                                                                             |
| Hematological System Development and Function | 1.8E-04-1.67E-02  | LIF, F2R, CNTF, NGF, PLA2G7, SGMS1, MTTP, MGAT3, HMOX1, DHCR7, GLB1, ACSL5, CAV1, FGF7, PLSCR1, FAAH, LRP10, CPT1A, FST, ABCG2, GM2A, FAR1, SCD2, VIM, PISD, P2RX7, ABCB1B, PDGFB, INHBA, ELOVL6, KITLG, SEMA3A, PIP5K1A, PTPN11, CD40, SREBF1, LPCAT1, HTT, EEF1A1, RUNX1, PPARGC1A, FADS1, PRDX2                                                                                                                                                                                                                                                                                                                                                                                                                                                                                                                                                                                                                                                                                                                                                                                                                                                                                                                                                                                                                                                                                                                                                                                                                                                                                                                                                                                                                                                                                                                                                                                                                                                                                                                                                                                                                                                                                                                                                                                                                                                                                                                                                                                                                                                                                                                                                                                                                                                                                     |
| Lipid Metabolism                              | 1.8E-04-1.75E-02  |                                                                                                                                                                                                                                                                                                                                                                                                                                                                                                                                                                                                                                                                                                                                                                                                                                                                                                                                                                                                                                                                                                                                                                                                                                                                                                                                                                                                                                                                                                                                                                                                                                                                                                                                                                                                                                                                                                                                                                                                                                                                                                                                                                                                                                                                                                                                                                                                                                                                                                                                                                                                                                                                                                                                                                                        |

|                                                       |                   |                                                                                                                                                                                                                                                                                                                                                                                                                                                                                                                                                                                                                                                                |
|-------------------------------------------------------|-------------------|----------------------------------------------------------------------------------------------------------------------------------------------------------------------------------------------------------------------------------------------------------------------------------------------------------------------------------------------------------------------------------------------------------------------------------------------------------------------------------------------------------------------------------------------------------------------------------------------------------------------------------------------------------------|
| Small Molecule Biochemistry                           | 1.8E-04-1.75E-02  | LIF, JAK1, TGFBR1, F2R, SGK1, MAP4K4, RICTOR, PLA2G7, CCND1, CDK5R1, MTTP, MYLK, SOD2, PIM1, GLB1, BRSK1, ACSL5, CAV1, SAFB, TXN, ETS1, ACAP1, CPT1A, LRP10, FST, GM2A, TKT, PTCH1, ABCB1B, INHBA, PDGFB, ELOVL6, PIP5K1A, CD40, PTPN11, HTT, SNF1LK, PLCB3, RUNX1, FADS1, PRDX2, SRD5A1, PRDX1, CNTF, HSD17B11, NGF, SGMS1, PHKA2, MGAT3, HMOX1, DHCR7, FOXO3, BRD4, SMOX, ACADM, FGF7, CHEK2, PLSCR1, FAAH, ABCG2, SCD2, FAR1, G6PD, VIM, IKBKE, PISD, P2RX7, GGT1, PRKCG, KITLG, GNAI2, SEMA3A, CHST1, PRKAR2B, LPCAT1, SREBF1, EEF1A1, ADAM10, RPS6KA4, VGF, PPARGC1A                                                                                      |
| Cell Morphology                                       | 1.8E-04-1.52E-02  | DPYSL2, PHLDA1, ATP6V0C, LIF, CREM, PTPN23, F2R, ACCN3, PBX1, DNAJC3, CCND1, ODC1, CDK5R1, PVR, NR2F1, RPS3A, MXD3, SOD2, PIM1, BRSK1, CAV1, CAST, SERPINE1, PMAIP1, TIMP2, ETS1, PTPRE, FST, MTSS1, ITGA6, LMNA, CSF3, NEDD4, INHBA, MLL, PDGFB, PIP5K1A, CD40, PTPN11, LIMA1, HTT, RUNX1, CTTN, CD151, SULF1, PRDX1, PTPN14, CTNNA1, ETS2, NGF, PDCD4, MGAT3, HMOX1, NFKBIA, RASSF1, PTGFRN, SDC2, FOXO3, MXD1, BRD4, ASPH, FGF7, PLSCR1, PARVA, G6PD, VIM, P2RX7, DLC1, PRKCG, KITLG, SEMA3A, PRKAR2B, NTRK3, CORO1A, CDGAP, SKIL, CXCL2, PPARGC1A                                                                                                          |
| Gastrointestinal Disease                              | 2.24E-04-7.99E-03 | DPYSL2, F2R, SRD5A1, SGK1, FLRT2, HSD17B11, CDKN2C, CCNB2, MAP4K4, TUBB, ODC1, PTMA, PCOLCE, PDCD4, NR2F1, HMOX1, MXD3, HSP90AB1, CRIP1, PRRX1, MXD1, FOXO3, ACSL5, CAV1, C9ORF167, NEK7, SERPINE1, TIMP2, FST, NDRG1, TUBB2C, PDE10A, CKNK2, ITGA6, OVGP1, REV3L, BUB1B, CPEB4, MCM3, HSPD8, EMP1, PTPN11, NTRK3, NUAJ1, FEN1, MAT2A, IVD                                                                                                                                                                                                                                                                                                                     |
| Cellular Movement                                     | 2.27E-04-1.61E-02 | DPYSL2, IL15RA, ATP6V0C, LIF, TGFBR1, JAK1, F2R, CCNB2, MMP13, MAP4K4, TUBB, NEXN, PLA2G7, CCND1, ODC1, CDK5R1, PVR, PEM, MYLK, NR2F1, NR4A3, HRH1, SOD2, AIRE, PIM1, CAV1, FOSL2, NEO1, CAST, TXN, SERPINE1, TIMP2, ETS1, FST, PON2, MTSS1, ITGA6, PDE4B, ABCB1B, CSF3, MLL, INHBA, PDGFB, ZNF423, PIP5K1A, PTPN11, CD40, NR1D1, NUAJ1, PLCB3, CTTN, CD34, CD151, DCBLD2, SULF1, S100A6, PTPN14, ETS2, RARRES1, NGF, PDCD4, MGAT3, NFKBIA, RASSF1, HSP90AB1, SDC2, FOXO3, MXD1, SMO, FGF7, LASP1, LIMS2, NRP2, TUBB2C, MRC2, G6PD, VIM, MMP10, DLC1, PRKCG, GNAI2, KITLG, CHST1, SEMA3A, SREBF1, NDE1, PPIA (includes EG:268373), ZEB2, CORO1A, ADAM10, CXCL2 |
| Cell-To-Cell Signaling and Interaction                | 2.41E-04-1.25E-02 | SULF1, LIF, ABCG2, CSF3, NGF, CCND1, PTMA, KITLG, PRKAR2B, CD40, SDC2, NTRK3, FOXO3, MXD1, HTT, RSU1, SAFB                                                                                                                                                                                                                                                                                                                                                                                                                                                                                                                                                     |
| Organismal Development                                | 3.06E-04-1.15E-02 | JAK1, TGFBR1, LIF, F2R, PBX1, CDKN2C, CCNB2, RICTOR, CCND1, MTTP, PCOLCE, CD164, NR4A3, PIM1, FOSL2, SERPINE1, TIMP2, FST, FOXH1, TKT, PTCH1, LMNA, BACE1, CSF3, MAFF, NEDD4, MLL, INHBA, ZNF423, KAT2B, RPS4X, PTPN11, CD40, HTT, SF1, RUNX1, SRD5A1, CNTF, CTNNA1, TWSG1, H2AFZ, MAFG, HMOX1, NFKBIA, PLK2, PRRX1, MXD1, BRD4, SMO, LY6E, ARSB, ASPH, FGF7, FAAH, NRP2, TRIM28, MAN2A1, REV3L, EMP1, KITLG, LUC7L, ZEB2, ADAM10, FLII, CHD7                                                                                                                                                                                                                  |
| Post-Translational Modification                       | 3.1E-04-1.32E-02  | RNF139, DUSP8, LIF, TGFBR1, JAK1, F2R, SGK1, MAP4K4, RICTOR, CCND1, ODC1, CDK5R1, MTTP, MYLK, USP7, FKBP9, CAMK2D, SOD2, PIM1, BRSK1, SMG1, TXN, CAST, PTPRE, ATG7, TBCA, PTCH1, ITGA6, NEDD4, PDGFB, HSPA8, CBLB, KAT2B, WHSC1L1, ERP29, PTPN11, CD40, HTT, SNF1LK, CD34, MGAT2, CDKL3, PIM3, PRDX1, PRDX4, CNTF, PTPN14, NGF, PHKA2, HSP90AB1, BRD4, FGF7, CHEK2, STT3B, ERO1L, IKBKE, P2RX7, PRKCG, KITLG, PRKAR2B, NTRK3, PPIA (includes EG:268373), RIPK3, ADAM10, RPS6KA4, PPARGC1A                                                                                                                                                                      |
| Organismal Injury and Abnormalities                   | 4.38E-04-1.42E-02 | LIF, F2R, CNTF, CASP4, IDE, NGF, CDK5R1, HMOX1, SOD2, NFKBIA, CAV1, DAG1, SERPINE1, PMAIP1, FGF7, PLSCR1, ETS1, LMNA, BCL3, PDE4B, CSF3, PDGFB, PRKCG, KITLG, PPIA (includes EG:268373), HTT, PRDX2                                                                                                                                                                                                                                                                                                                                                                                                                                                            |
| Nervous System Development and Function               | 4.46E-04-1.2E-02  | DPYSL2, PER1, CREM, LIF, SGK1, CNTF, CTNNA1, ADH1C (includes EG:126), IDE, NGF, CDK5R1, SOX2, HRH1, NFKBIA, MXD3, COMT, SMO, ABCB8, KIF5C, DAG1, CHEK2, SLC6A8, NRP2, GM2A, ITGA6, BACE1, CSF3, INHBA, PDGFB, RCAN1, PRKCG, KITLG, GNAI2, ZNF423, SEMA3A, PIP5K1A, PRKAR2B, NR1D1, NDE1, NTRK3, HTT, PLCB3, RDH5, PPARGC1A                                                                                                                                                                                                                                                                                                                                     |
| Protein Synthesis                                     | 5.33E-04-2.5E-03  | ANAPC2, RPL11, PHLDA1, LIF, CDC20, EIF1, MMP13, RPL31, CASP4, IDE, CCND1, H2AFZ, RPS11, PCOLCE, PDCD4, RPL6, RPS3A, RPL18A, VCP, RPL35, RNF128, CAST, SERPINE1, RPS3, TIMP2, ATG7, MMP10, BACE1, BCL3, RPL23A (includes EG:6147), P2RX7, CSF3, NEDD4, INHBA, PRKCG, RPL37, CBLB, RPS4X, RPS10, RPS5, PTPN11, ANAPC5, EEF1A1, RPL41                                                                                                                                                                                                                                                                                                                             |
| Tissue Development                                    | 7.44E-04-1.56E-02 | LIF, PBX1, MMP13, MAP4K4, CDK5R1, SOX2, NR4A3, ZBTB17, CAV1, NEO1, FOSL2, ATF4, DAG1, SERPINE1, TIMP2, NDRG1, FOXH1, PTCH1, ITGA6, BACE1, INHBA, PDGFB, PTPN11, HTT, RUNX1, GADD45B, CNTF, CTNNA1, ETS2, NGF, TWSG1, HMOX1, NFKBIA, PRRX1, SMO, LY6E, ARSB, FGF7, NRP2, P2RX7, REV3L, GGT1, SEMA3A, LUC7L, NDUFB2, NTRK3, SREBF1, FLII, FEN1, CSRP3                                                                                                                                                                                                                                                                                                            |
| Respiratory Disease                                   | 8.37E-04-9.92E-03 | MALAT1, MAGED1, GADD45B, PSRC1, CDC20, PRDX1, TKT, ACO2, ADH1C (includes EG:126), CCNB2, CDKN2C, BUB1B, TUBB, DLC1, RASSF1, SOD2, PTPN11, CAV1                                                                                                                                                                                                                                                                                                                                                                                                                                                                                                                 |
| Skeletal and Muscular System Development and Function | 8.53E-04-1.2E-02  | SULF1, LIF, FST, MMP13, TWSG1, CSF3, INHBA, RCAN1, KITLG, CAMK2D, CAV1, FOSL2, PPARGC1A                                                                                                                                                                                                                                                                                                                                                                                                                                                                                                                                                                        |
| Reproductive System Disease                           | 9.36E-04-1.52E-02 | MALAT1, JAK1, LIF, CREM, SGK1, ACCN3, EIF1, CDKN2C, CCND1, RPS23, ODC1, HNRNPA1, MADD, SOD2, AIRE, CRIP1, CAV1, ATF4, FOSL2, TXN, PMAIP1, AMHR2, TIMP2, ETS1, ATG7, FST, ITGA6, TBK1, OVGP1, PDE4B, BUB1B, INHBA, CLCN5, CD40, PTPN11, FH, TMSB10, PRDX2, CD151, DCBLD2, SULF1, GADD45B, CDC20, CTNNA1, RARRES1, ETS2, CASP4, NGF, PDCD4, PTMA, MGAT3, RASSF1, NFKBIA, SDC2, PLK2, VCP, FOXO3, MXD1, FGF7, PARVA, ABCG2, VIM, IKBKE, REV3L, KITLG, PRKAR2B, CXXC5, RIPK3, CXCL2, TXNDC17, CASP8AP2                                                                                                                                                             |
| Embryonic Development                                 | 9.94E-04-1.55E-02 | JAK1, LIF, F2R, PBX1, CTNNA1, ETS2, MAP4K4, TWSG1, CCND1, ODC1, SOX2, NR4A3, MXD3, RASSF1, PIM1, PRRX1, BRD4, SMO, FOSL2, DAG1, FGF7, CHEK2, FST, NDRG1, NRP2, PTCH1, TIAL1, REV3L, MLL, PDGFB, INHBA, KITLG, PTPN11, NDE1, HTT, FLII, FEN1, RUNX1, SKIL                                                                                                                                                                                                                                                                                                                                                                                                       |
| Connective Tissue Development and Function            | 1.25E-03-1.68E-02 | PIM3, GADD45B, F2R, PBX1, MMP13, TWSG1, CCND1, ODC1, PCOLCE, PTMA, RASSF1, PRRX1, SMO, CAV1, BRD4, FOSL2, TXN, CAST, SERPINE1, FST, KHDRBS1, LMNA, P2RX7, GGT1, PDGFB, INHBA, PIP5K1A, PRKAR2B, SREBF1, NTRK3, SKIL, PPARGC1A                                                                                                                                                                                                                                                                                                                                                                                                                                  |
| Cardiovascular Disease                                | 1.29E-03-1.71E-02 | PER1, CREM, TGFBR1, LIF, F2R, ACCN3, DNAJC3, CCND1, PLA2G7, SOD2, PIM1, CAV1, ABCB8, CAST, TXN, PMAIP1, SERPINE1, TIMP2, ETS1, SLC6A8, PTCH1, LMNA, PDE4B, CSF3, RCAN1, PDGFB, PTPN11, CD40, CD68, CD34, PRCP, EPHX1, S100A6, CA13, CTNNA1, NGF, H2AFZ, HMOX1, NFKBIA, FOXO3, FGF7, OPRS1, TUBB2C, GNAI2, KITLG, GPD1L, PPIA (includes EG:268373), CSRP3, PPARGC1A                                                                                                                                                                                                                                                                                             |
| Dermatological Diseases and Conditions                | 1.29E-03-1.35E-02 | ANAPC2, ATP6V0C, ETS2, CCND1, SFXN3, ODC1, MAFG, CD164, NFKBIA, RNPS1, PTSS1, KHDRBS1, PTCH1, ITGA6, MPP2, MAFF, NEDD4, KPNB1, CHST1, TRIM44, ZEB2, MAT2A, CAD, CXCL2, RTN3, CD151, DUSP16                                                                                                                                                                                                                                                                                                                                                                                                                                                                     |
| Immune Cell Trafficking                               | 1.29E-03-1.61E-02 | DPYSL2, JAK1, NGF, CCND1, PVR, MYLK, HRH1, TXN, SERPINE1, TIMP2, PON2, ITGA6, PDE4B, ABCB1B, INHBA, KITLG, GNAI2, SEMA3A, CD40, PPIA (includes EG:268373), CORO1A, ADAM10, PLCB3, CXCL2, CD34, CD151                                                                                                                                                                                                                                                                                                                                                                                                                                                           |
| Inflammatory Response                                 | 1.29E-03-7.39E-03 | GNAI2, KITLG, CXCL2, CSF3                                                                                                                                                                                                                                                                                                                                                                                                                                                                                                                                                                                                                                      |
| Organ Morphology                                      | 1.29E-03-1.52E-02 | LIF, CREM, JAK1, F2R, ADH1C (includes EG:126), CDKN2C, TWSG1, CCND1, MYLK, CAMK2D, PIM1, BRD4, CAV1, KIF5C, SERPINE1, FGF7, TIMP2, ETS1, FST, NRP2, SDC2, LMNA, CSF3, GGT1, PDGFB, INHBA, KITLG, NDE1, HTT                                                                                                                                                                                                                                                                                                                                                                                                                                                     |
| Reproductive System Development and Function          | 1.29E-03-1.2E-02  | KITLG, FST, NRP2, SF1, NGF, GGT1, CCND1, FGF7, INHBA                                                                                                                                                                                                                                                                                                                                                                                                                                                                                                                                                                                                           |
| Tumor Morphology                                      | 1.29E-03-1.58E-02 | PTPRE, F2R, CLCA1 (includes EG:12722), PTCH1, PBX1, CDKN2C, CSF3, ODC1, MLL, KITLG, NFKBIA, CD40, PIM1, SDC2, CAV1, SKIL, CXCL2, SERPINE1, CSRP3, CD151                                                                                                                                                                                                                                                                                                                                                                                                                                                                                                        |
| Cellular Compromise                                   | 1.45E-03-1.36E-02 | CREM, SGK1, AP3D1, CNTF, BACE1, LMNA, VIM, TBK1, MAFF, CDK5R1, MAFG, SEMA3A, SOD2, RASSF1, NTRK3, STMN4, LIMA1, HTT, CAV1, CAST, TXN, CTTN, PPARGC1A                                                                                                                                                                                                                                                                                                                                                                                                                                                                                                           |
| Molecular Transport                                   | 2.26E-03-1.75E-02 | LIF, F2R, PRDX1, CNTF, NGF, SGMS1, MTTP, MGAT3, HMOX1, SOD2, NFKBIA, GLB1, ACSL5, FOXO3, CAV1, TXN, CAST, FGF7, PLSCR1, FAAH, LRP10, CPT1A, PON2, ATG7, FST, GM2A, ABCG2, SCD2, BCL3, P2RX7, ABCB1B, GGT1, INHBA, KPNB1, CLCN5, GNAI2, KITLG, PIP5K1A, PTPN11, SREBF1, HTT, EEF1A1, PLCB3, RUNX1, PPARGC1A                                                                                                                                                                                                                                                                                                                                                     |
| Tissue Morphology                                     | 2.71E-03-1.55E-02 | PER1, LIF, CNTF, PBX1, NGF, PCOLCE, HMOX1, PRRX1, MXD1, CAV1, SMO, ATF4, CAST, DAG1, PMAIP1, SERPINE1, PTPRE, FST, TKT, P2RX7, CSF3, PDGFB, RCAN1, INHBA, KITLG, PIP5K1A, PRKAR2B, PPIA (includes EG:268373), HTT, RUNX1, PPARGC1A                                                                                                                                                                                                                                                                                                                                                                                                                             |
| Connective Tissue Disorders                           | 2.85E-03-1.51E-02 | MRC1, IL15RA, PTPN23, F2R, PBX1, MMP13, IDE, CCND1, ODC1, NR4A3, HNRNPA1, RPS3A, SOD2, CAV1, SAFB, DAG1, CAST, TXN, PMAIP1, ETS1, NONO, TBK1, PDE4B, CSF3, NEDD4, MLL, PDGFB, HSPA8, CD68, CD40, PTPN11, CLEC4E, RUNX1, PRDX2, ANAPC2, GADD45B, PRDX1, PTMA, NFKBIA, MXD1, FOXO3, HLA-B, ASPH, RPS3, CHEK2, NLRP3, TUBB2C, G6PD, MMP10, VIM, P2RX7, PRKCG, GNAI2, NTRK3, CXCL2                                                                                                                                                                                                                                                                                 |
| Endocrine System Development and Function             | 3.06E-03-1.24E-02 | FAAH, FST, LIF, PTPN11, CNTF, HTT, HSD17B11, SAFB, RUNX1, INHBA                                                                                                                                                                                                                                                                                                                                                                                                                                                                                                                                                                                                |
| Free Radical Scavenging                               | 3.22E-03-3.22E-03 | SOD2, PON2, PRDX1, HTT, FOXO3, TXN, NGF, GGT1                                                                                                                                                                                                                                                                                                                                                                                                                                                                                                                                                                                                                  |
| Hair and Skin Development and Function                | 3.31E-03-1.52E-02 | MADD, FST, NFKBIA, SOD2, PIM1, PTCH1, CLCA1 (includes EG:12722), SMO, BCL3, CCND1, INHBA, CHEK2                                                                                                                                                                                                                                                                                                                                                                                                                                                                                                                                                                |
| Drug Metabolism                                       | 3.78E-03-9.92E-03 | CTNS, SOD2, FST, CD40, G6PD, RUNX1, GGT1, PDGFB, INHBA                                                                                                                                                                                                                                                                                                                                                                                                                                                                                                                                                                                                         |

|                                                |                   |                                                                                                                                                                                                                                                                                                                                                                                                                                                              |
|------------------------------------------------|-------------------|--------------------------------------------------------------------------------------------------------------------------------------------------------------------------------------------------------------------------------------------------------------------------------------------------------------------------------------------------------------------------------------------------------------------------------------------------------------|
| Hypersensitivity Response                      | 3.78E-03-3.78E-03 | KITLG, NGF                                                                                                                                                                                                                                                                                                                                                                                                                                                   |
| Lymphoid Tissue Structure and Development      | 3.78E-03-1.19E-02 | KITLG, F2R, CD40, PIM1, PBX1, RUNX1, P2RX7, CSF3, FGF7, MLL, MAFG                                                                                                                                                                                                                                                                                                                                                                                            |
| Nucleic Acid Metabolism                        | 3.78E-03-7.39E-03 | SOD2, GLB1, FAR1, ELOVL6                                                                                                                                                                                                                                                                                                                                                                                                                                     |
| Organ Development                              | 3.78E-03-1.27E-02 | FST, CREM, CDKN2C, ETS2, MAN2A1, NGF, CSF3, CCND1, PDGFB, INHBA, CAMK2D, PTPN11, PIM1, LY6E, TXN, FGF7                                                                                                                                                                                                                                                                                                                                                       |
| Skeletal and Muscular Disorders                | 3.78E-03-1.27E-02 | MRC1, ANAPC2, IL15RA, LIF, GADD45B, PRDX1, MMP13, IDE, H2AFZ, PTMA, NR4A3, HNRNPA1, SOD2, NFKBIA, SDC2, KIF21A, FOXO3, CAV1, HLA-B, SAFB, DAG1, TXN, SERPINE1, RPS3, CHEK2, FAAH, FST, NONO, NLRP3, NDRG1, TUBB2C, VIM, MMP10, LMNA, PDE4B, P2RX7, CSF3, GNAI2, HSPA8, KITLG, CD68, CD40, CLEC4E, RUNX1, CXCL2, CSRP3, PRDX2, PPARGC1A                                                                                                                       |
| Protein Trafficking                            | 3.99E-03-1.52E-02 | KPNB1, CLCN5, PIP5K1A, NFKBIA, SOD2, ATG7, F2R, HTT, BCL3, CAST                                                                                                                                                                                                                                                                                                                                                                                              |
| Immunological Disease                          | 4.46E-03-1.52E-02 | MRC1, RNF139, PER1, PRIM1, JAK1, LIF, ACO2, EIF1, PBX1, MMP13, CDKN2C, IDE, TUBB, PLA2G7, NR4A3, HRH1, HNRNPA1, SOD2, AIRE, PIM1, GLB1, ABCC8, SAFB, CAST, TXN, STX11, ETS1, CPT1A, NONO, TKT, PDE4B, CSF3, MLL, CBLB, HSPA8, CD68, CLEC4E, CD40, RUNX1, SLC11A1, PRDX2, GADD45B, PRDX1, LILRB4 (includes EG:11006), CASP4, TWSG1, NGF, SGMS1, PTMA, NFKBIA, MXD1, FOXO3, HLA-B, RPS3, CHEK2, VIM, BCL3, GGT1, KITLG, PPIA (includes EG:268373), SKIL, CXCL2 |
| Cell-mediated Immune Response                  | 4.64E-03-1.52E-02 | DPYSL2, PBX1, ITGA6, ABCB1B, GNAI2, CBLB, SEMA3A, CD40, AIRE, PTPN11, PIM1, ADAM10, HLA-B, PLCB3, TIMP2                                                                                                                                                                                                                                                                                                                                                      |
| Carbohydrate Metabolism                        | 4.89E-03-8.5E-03  | CHST1, ACAP1, CPT1A, PTPN11, SREBF1, TKT, HTT, FOXO3, PTCH1, G6PD, VGF, PPARGC1A                                                                                                                                                                                                                                                                                                                                                                             |
| Cardiovascular System Development and Function | 5.32E-03-1.2E-02  | CREM, TGFBFR1, F2R, LMNA, CSF3, INHBA, KITLG, HMOX1, SEMA3A, CAMK2D, PRRX1, FOXO3, CAV1, SERPINE1, TIMP2                                                                                                                                                                                                                                                                                                                                                     |
| Hepatic System Disease                         | 6.63E-03-1.68E-02 | FAAH, GADD45B, CPT1A, SLC25A4, CNTF, EIF1, TBK1, NGF, DLC1, CCND1, INHBA, MTTP, HMOX1, SOD2, CD40, SREBF1, PMAIP1, FGF7                                                                                                                                                                                                                                                                                                                                      |
| Developmental Disorder                         | 6.96E-03-7.39E-03 | S100A6, LIF, CREM, F2R, CNTF, PBX1, MMP13, DNAJC3, NGF, TWSG1, CCND1, H2AFZ, CDK5R1, SOX2, HRH1, HMOX1, DHCR7, NFKBIA, PIM1, FOXO3, CAV1, ATF4, FOSL2, DAG1, ASPH, TXN, SERPINE1, OPRS1, ATG7, FST, PTCH1, ITGA6, LMNA, REV3L, BUB1B, CSF3, GGT1, RCAN1, KITLG, GNAI2, SREBF1, CRTAP, HTT, SF1, CSRP3                                                                                                                                                        |
| Endocrine System Disorders                     | 7.39E-03-1.05E-02 | MAGED1, SOD2, PRDX1, GLB1, SREBF1, CNTF, ABCC8, GLUD1, IDE, CCND1, HADH, PRDX2                                                                                                                                                                                                                                                                                                                                                                               |
| Cell Signaling                                 | 9.92E-03-9.92E-03 | GNAI2, TGFBFR1, GADD45B, F2R                                                                                                                                                                                                                                                                                                                                                                                                                                 |
| Metabolic Disease                              | 1.05E-02-1.32E-02 | NR4A3, SREBF1, CNTF, ABCC8, GLUD1, IDE, ACADM, HADH, PPARGC1A                                                                                                                                                                                                                                                                                                                                                                                                |
| Digestive System Development and Function      | 1.15E-02-1.2E-02  | TGFBFR1, PRRX1, ASPH, FGF7, CHD7, PDGFB                                                                                                                                                                                                                                                                                                                                                                                                                      |
| Hepatic System Development and Function        | 1.2E-02-1.2E-02   | SREBF1, MMP13                                                                                                                                                                                                                                                                                                                                                                                                                                                |
| Ophthalmic Disease                             | 1.2E-02-1.2E-02   | FAAH, KIF21A                                                                                                                                                                                                                                                                                                                                                                                                                                                 |
| Respiratory System Development and Function    | 1.2E-02-1.2E-02   | NFKBIA, TGFBFR1                                                                                                                                                                                                                                                                                                                                                                                                                                              |
| Visual System Development and Function         | 1.2E-02-1.2E-02   | FOSL2, INHBA                                                                                                                                                                                                                                                                                                                                                                                                                                                 |
| Inflammatory Disease                           | 1.21E-02-1.21E-02 | MRC1, ANAPC2, IL15RA, GADD45B, PRDX1, MMP13, IDE, PTMA, NR4A3, HNRNPA1, NFKBIA, SOD2, FOXO3, HLA-B, SAFB, TXN, RPS3, CHEK2, NLRP3, NONO, TUBB2C, MMP10, VIM, P2RX7, PDE4B, CSF3, GNAI2, HSPA8, CD68, CD40, CLEC4E, RUNX1, CXCL2, PRDX2                                                                                                                                                                                                                       |
| Amino Acid Metabolism                          | 1.32E-02-1.32E-02 | LIF, JAK1, TGFBFR1, SGK1, MAP4K4, IKBKE, P2RX7, RICTOR, CCND1, PDGFB, PHKA2, CDK5R1, PRKCG, KITLG, MYLK, PRKAR2B, PIM1, BRSK1, BRD4, ADAM10, SNF1LK, RPS6KA4, CHEK2                                                                                                                                                                                                                                                                                          |

Table S6B.

| Ingenuity Canonical Pathways                   | P-value     | Molecules                                                                            |
|------------------------------------------------|-------------|--------------------------------------------------------------------------------------|
| Glycosaminoglycan Degradation                  | 0.002951209 | SULF1, GLB1, IDS, GM2A, ARSB                                                         |
| NRF2-mediated Oxidative Stress Response        | 0.009772372 | PRDX1, DNAJC3, DNAJC10, MAFF, PRKCG, MAFG, HMOX1, ERP29, SOD2, VCP, ATF4, TXN, EPHX1 |
| N-Glycan Degradation                           | 0.013182567 | GLB1, GM2A, MAN2A1, MAN1A2                                                           |
| PPAR Signaling                                 | 0.015488166 | NR2F1, NFKBIA, HSP90AB1, MAP4K4, BCL3, IKBKE, PDGFB, PPARGC1A                        |
| IL-10 Signaling                                | 0.021877616 | HMOX1, JAK1, NFKBIA, MAP4K4, BCL3, IKBKE                                             |
| GM-CSF Signaling                               | 0.023442288 | ETS1, CAMK2D, PTPN11, PIM1, RUNX1, CCND1                                             |
| PI3K/AKT Signaling                             | 0.023988329 | JAK1, NFKBIA, HSP90AB1, YWHAB, FOXO3, HLA-B, BCL3, IKBKE, CCND1                      |
| Endoplasmic Reticulum Stress Pathway           | 0.025118864 | DNAJC3, ATF4, MBTPS2                                                                 |
| Phenylalanine Metabolism                       | 0.029512092 | FAAH, PRDX1, SMOX, PRDX2                                                             |
| N-Glycan Biosynthesis                          | 0.030902954 | STT3B, MGAT3, MAN2A1, MAN1A2, MGAT2                                                  |
| Glycosphingolipid Biosynthesis - Ganglioseries | 0.047863009 | GLB1, ST3GAL1, GM2A                                                                  |

**Table S7. IPA analysis of the biological functions (A) plus signaling and metabolic pathways (B) that were significantly over-represented in the 434-member 'shared ChAG-cancer signature' mGEP response.**

**Table S7A.**

| Category                          | P-value           | Molecules                                                                                                                                                                                                                                                                                                                                                                                                                                                                                                                                                                                                                                                                                                                                                                                                                                                                                                                                                                                                                                                         |
|-----------------------------------|-------------------|-------------------------------------------------------------------------------------------------------------------------------------------------------------------------------------------------------------------------------------------------------------------------------------------------------------------------------------------------------------------------------------------------------------------------------------------------------------------------------------------------------------------------------------------------------------------------------------------------------------------------------------------------------------------------------------------------------------------------------------------------------------------------------------------------------------------------------------------------------------------------------------------------------------------------------------------------------------------------------------------------------------------------------------------------------------------|
| Cancer                            | 3.75E-13-1.58E-02 | MALAT1, DPYSL2, MAGED1, PRIM1, TGFBR1, F2R, SGK1, EIF1, DNAJC3, CCNB2, CDKN2C, CCND1, PCOLCE, MYLK, MXD3, SOD2, GLB1, CAV1, TXN, SERPINE1, TIMP2, ETS1, CLCA1 (includes EG:12722), PTCH1, ITGA6, ANO6, TBK1, NEDD4, C10ORF81, HSPA8, CLCN5, PATZ1, RSU1, RPS25, RUNX1, FH, EPHX1, PRDX2, ANAPC2, GADD45B, PRDX1, CNTF, PTPN14, HSD17B11, CASP4, SGMS1, PTMA, RASSF1, HSP90AB1, BICC1, HLA-B, LY6E, ASPH, OPRS1, TUBB2C, ABCG2, TRIM28, VIM, P2RX7, GGT1, DLC1, CPEB4, SEMA3A, BAT1, SREBF1, NTRK3, ZEB2, RIPK3, ADAM10, FEN1, TXNDC17, JAK1, PBX1, MAP4K4, RNF26, TUBB, PVR, SOX2, NR2F1, USP7, CAMK2D, CRIP1, ASXL2, ACSL5, CHD1 (includes EG:1105), C9ORF167, CAST, PTPRE, GABPB2, PPIG, PGLYRP2, GM2A, OPCML, KCNK2, OVGP1, BUB1B, ATAD2, DDX17, KAT2B, PIP5K1A, PTPN11, SF1, NUAK1, CTTN, TMSB10, CD151, DCBLD2, SULF1, S100A6, CDC20, TRAM1, RARRES1, ETS2, NGF, PHKA2, PDCD4, MGAT3, HMOX1, NFKBIA, PLK2, VCP, NEK7, LASP1, CHEK2, PARVA, PSRC1, G6PD, GLUD1, RPL23, GNAI2, CHST1, PRKAR2B, NDUFV2, CXXC5, EEF1A1, FLII, MAT2A, SKIL, IVD, SLC7A3, CASP8AP2 |
| Cell Death                        | 2.61E-11-1.54E-02 | MAGED1, TGFBR1, F2R, SGK1, CDKN2C, IDE, CCND1, PEM, MYLK, SOD2, MXD3, CAV1, ATF4, TXN, SERPINE1, TIMP2, ETS1, ITGA6, TBK1, HSPA8, NR1D1, RUNX1, PRDX2, EPHX1, GADD45B, PRDX1, CNTF, CTNNA1, CASP4, QARS, SGMS1, PTMA, RASSF1, HSP90AB1, RNPS1, BRD4, HLA-B, KHDRBS1, ABCG2, TRIM28, P2RX7, DLC1, GGT1, SEMA3A, KLF7, NTRK3, ZEB2, RIPK3, FEN1, TXNDC17, PPARGC1A, PHLDA1, JAK1, TUBB, NR2F1, USP7, CAMK2D, AIRE, FOSL2, CAST, DAG1, PTPRE, RAD54L, LMNA, BACE1, BUB1B, CBLB, KAT2B, PTPN11, NUAK1, TMSB10, SULF1, S100A6, CDC20, ITM2B, ETS2, NGF, PHKA2, PDCD4, MGAT3, HMOX1, NFKBIA, PLK2, VCP, CHEK2, PLSCR1, FAAH, DAP, PARVA, SLC25A4, G6PD, GLUD1, PRKAR2B, NDUFV2, EEF1A1, SKIL, CASP8AP2                                                                                                                                                                                                                                                                                                                                                                  |
| Genetic Disorder                  | 6.53E-11-1.47E-02 | MALAT1, DPYSL2, MAGED1, PRIM1, TGFBR1, F2R, SGK1, EIF1, CCNB2, CDKN2C, IDE, CCND1, SOD2, GLB1, KIF21A, CAV1, TXN, SERPINE1, TIMP2, CTNS, ETS1, TKT, PTCH1, ITGA6, ANO6, HSPA8, CLCN5, NR1D1, RUNX1, FH, PRDX2, EPHX1, SEPN1 (includes EG:57190), ANAPC2, GADD45B, PRDX1, CNTF, CA13, CTNNA1, HSD17B11, RPL31, CASP4, TWSG1, PTMA, SEC61A1, RASSF1, HSP90AB1, BICC1, HLA-B, LY6E, ASPH, OPRS1, TUBB2C, ABCG2, VIM, P2RX7, GGT1, CPEB4, SEMA3A, PSME1, NPTN, SREBF1, NTRK3, NDE1, GPD1L, ZEB2, FEN1, PPARGC1A, MAP4K4, TUBB, MTTTP, SOX2, CRIP1, AIRE, ABCC8, NONO, CPT1A, GM2A, KCNK2, OPCML, ZNF624, ENO2, RAD54L, BACE1, LMNA, MUT, BUB1B, ATAD2, TUBA1B, CBLB, PTPN11, CRTAP, SF1, SUOX, MGAT2, CD151, S100A6, LITAF, CDC20, ITM2B, TRAM1, NGF, PDCD4, HMOX1, DHCR7, NFKBIA, PLK2, VCP, ARSB, IER5, ACADM, LASP1, CHEK2, FAAH, SLC25A4, G6PD, SCD2, GLUD1, MAN2A1, GNAI2, PRKAR2B, NDUFV2, TMED10, EEF1A1, IVD, HADH                                                                                                                                            |
| Cellular Growth and Proliferation | 2.97E-08-1.57E-02 | MAGED1, TGFBR1, F2R, SGK1, EIF1, DNAJC3, CDKN2C, CCND1, SOD2, MXD3, CAV1, ATF4, TXN, SERPINE1, TIMP2, ETS1, PTCH1, CLCA1 (includes EG:12722), ITGA6, PATZ1, NR1D1, ANAPC5, RUNX1, PRDX2, GADD45B, PRDX1, CNTF, PRDX4, PTPN14, CTNNA1, H2AFZ, SGMS1, PTMA, MAFG, RASSF1, SEC61A1, BRD4, LY6E, ASPH, NRP2, KHDRBS1, TRIM28, VIM, P2RX7, DLC1, GGT1, SEMA3A, SREBF1, NTRK3, NDE1, TBC1D8, ZEB2, ADAM10, PHLDA1, JAK1, PBX1, MAP4K4, ATP5G2, PVR, MTTTP, SOX2, USP7, CRIP1, ACSL5, FOSL2, CAST, PTPRE, GABPB2, KCNK2, LMNA, RPL23A (includes EG:6147), BUB1B, ATAD2, DDX17, CBLB, KAT2B, PTPN11, LIMA1, SF1, TMSB10, FADS1, DCBLD2, S100A6, LITAF, ETS2, RARRES1, NGF, WDR6 (includes EG:11180), MGAT3, HMOX1, DHCR7, NFKBIA, PLK2, CHEK2, PLSCR1, DAP, PSRC1, CHERP, G6PD, ERO1L, GNAI2, PRKAR2B, SKIL                                                                                                                                                                                                                                                               |
| Hematological Disease             | 4.2E-08-1.58E-02  | STRN, PRIM1, JAK1, CDC20, F2R, PRDX1, PBX1, TWSG1, TUBB, NEXN, CCND1, HMOX1, SOD2, NFKBIA, CAMK2D, HSP90AB1, CAV1, ABCC8, ATF4, FOSL2, SERPINE1, ACADM, LASP1, CHEK2, PLSCR1, TIMP2, ETS1, OPRS1, CPT1A, NONO, NRP2, TUBB2C, TKT, G6PD, GLUD1, MAN2A1, P2RX7, ANXA6, PTPN11, NTRK3, SREBF1, FEN1, RUNX1, CD151, PPARGC1A                                                                                                                                                                                                                                                                                                                                                                                                                                                                                                                                                                                                                                                                                                                                          |
| Gastrointestinal Disease          | 6.84E-08-1.02E-02 | DPYSL2, F2R, SGK1, CNTF, HSD17B11, CCNB2, CDKN2C, MAP4K4, TUBB, PDCD4, PTMA, MTTTP, PCOLCE, MYLK, NR2F1, HMOX1, HSP90AB1, CRIP1, ACSL5, CAV1, C9ORF167, NEK7, SERPINE1, TIMP2, TUBB2C, KCNK2, ITGA6, OVGP1, BUB1B, CPEB4, HSPA8, PTPN11, NUAK1, FEN1, MAT2A, IVD                                                                                                                                                                                                                                                                                                                                                                                                                                                                                                                                                                                                                                                                                                                                                                                                  |
| Cellular Function and Maintenance | 1.79E-07-1.27E-02 | DPYSL2, SULF1, TGFBR1, PRDX1, SGK1, CDKN2C, NGF, TUBB, CCND1, PTMA, MTTTP, NR2F1, USP7, NFKBIA, SOD2, HSP90AB1, AIRE, GLB1, VCP, CAV1, HLA-B, ABCC8, CHEK2, ETS1, PSRC1, ABCG2, ERO1L, P2RX7, CBLB, SEMA3A, PRKAR2B, NTRK3, RSU1, PPARGC1A                                                                                                                                                                                                                                                                                                                                                                                                                                                                                                                                                                                                                                                                                                                                                                                                                        |
| Gene Expression                   | 7.27E-07-1.35E-02 | PRIM1, MAGED1, JAK1, JMDJ3, TGFBR1, F2R, SGK1, MGA (includes EG:23269), PBX1, CDKN2C, BAZ1A, MAP4K4, CCND1, SOX2, PEM, NR2F1, SOD2, CAMK2D, MXD3, CHD2, CAV1, ATF4, CHD1 (includes EG:1105), FOSL2, SMARCC2 (includes EG:6601), TXN, SERPINE1, ETS1, ITGA6, RAD54L, LMNA, OVGP1, TBK1, DDX17, KAT2B, PATZ1, PTPN11, NR1D1, SF1, RUNX1, LITAF, PRDX1, PRDX4, CNTF, ETS2, NGF, PTMA, PDCD4, NFKBIA, SEC61A1, RNPS1, PLK2, BTAF1, VEZF1, KHDRBS1, TRIM28, SCD2, AXUD1, HIVEP3, CHST1, PRKAR2B, KLF7, NTRK3, SREBF1, FLII, RPS6KA4, SKIL, PTRF, PPARGC1A                                                                                                                                                                                                                                                                                                                                                                                                                                                                                                              |
| Organismal Survival               | 1.3E-06-3.19E-03  | TGFBR1, JAK1, F2R, CNTF, PBX1, ETS2, MAP4K4, IDE, TWSG1, CCND1, MAFG, MTTTP, HMOX1, SOD2, NFKBIA, HSP90AB1, BRD4, LY6E, ASPH, TXN, SERPINE1, ETS1, NRP2, PTCH1, ITGA6, BACE1, MAN2A1, TBK1, PISD, GGT1, GNAI2, CBLB, KAT2B, PTPN11, SREBF1, NTRK3, TMED10, FLII, SKIL                                                                                                                                                                                                                                                                                                                                                                                                                                                                                                                                                                                                                                                                                                                                                                                             |
| Post-Translational Modification   | 1.81E-06-1.58E-02 | JAK1, TGFBR1, F2R, PRDX1, SGK1, PRDX4, CNTF, PTPN14, MAP4K4, NGF, CCND1, PHKA2, MTTTP, MYLK, USP7, FKBP9, SOD2, CAMK2D, HSP90AB1, BRD4, TXN, CAST, CHEK2, STT3B, PTPRE, TBCA, PTCH1, ITGA6, GLUD1, ERO1L, P2RX7, NEDD4, HSPA8, CBLB, KAT2B, PRKAR2B, ERP29, PTPN11, NTRK3, ADAM10, RIPK3, RPS6KA4, MGAT2, PPARGC1A                                                                                                                                                                                                                                                                                                                                                                                                                                                                                                                                                                                                                                                                                                                                                |
| Neurological Disease              | 5.14E-06-1.54E-02 | DPYSL2, MAGED1, F2R, SGK1, CDKN2C, IDE, CCND1, NR2F1, SOX2, MXD3, SOD2, GLB1, GABARAPL1, TXN, DAG1, CAST, SERPINE1, CPT1A, GM2A, TKT, PTCH1, ZNF624, ENO2, BACE1, RAD54L, LMNA, TUBA1B, ATAD2, HSPA8, CBLB, NR1D1, RUNX1, FH, PRDX2, S100A6, LITAF, PRDX1, CNTF, ITM2B, CA13, TRAM1, CTNNA1, RPL31, CASP4, NGF, PTMA, MAFG, HMOX1, DHCR7, SEC61A1, NFKBIA, PLK2, HLA-B, ASPH, IER5, ACADM, OPRS1, SLC25A4, TUBB2C, G6PD, SCD2, GLUD1, VIM, P2RX7, SEMA3A, PSME1, NPTN, PRKAR2B, KLF7, NDUFV2, SREBF1, NTRK3, ZEB2, EEF1A1, HADH, PPARGC1A                                                                                                                                                                                                                                                                                                                                                                                                                                                                                                                         |
| Lipid Metabolism                  | 5.99E-06-1.35E-02 | F2R, CNTF, IDE, NGF, SGMS1, MTTTP, MGAT3, HMOX1, DHCR7, SOD2, GLB1, ACSL5, CAV1, ACADM, PLSCR1, FAAH, CPT1A, LRP10, GM2A, ABCG2, FAR1, G6PD, SCD2, LMNA, VIM, P2RX7, PISD, ELOVL6, SEMA3A, PIP5K1A, PRKAR2B, PTPN11, LPCAT1, SREBF1, EEF1A1, PPARGC1A, FADS1, PRDX2                                                                                                                                                                                                                                                                                                                                                                                                                                                                                                                                                                                                                                                                                                                                                                                               |
| Small Molecule Biochemistry       | 5.99E-06-1.58E-02 | TGFBR1, JAK1, F2R, SGK1, MAP4K4, IDE, CCND1, MTTTP, MYLK, SOD2, GLB1, ACSL5, CAV1, TXN, ETS1, PTPRE, LRP10, CPT1A, TKT, GM2A, PTCH1, MAN1A2, ELOVL6, KAT2B, PIP5K1A, PTPN11, PLCB3, PRDX2, FADS1, PRDX1, CNTF, PTPN14, NGF, PHKA2, SGMS1, MGAT3, HMOX1, DHCR7, BRD4, ACADM, CHEK2, PLSCR1, FAAH, ABCG2, FAR1, G6PD, SCD2, GLUD1, VIM, MAN2A1, P2RX7, PISD, GGT1, GNAI2, CHST1, SEMA3A, PRKAR2B, SREBF1, LPCAT1, EEF1A1, ADAM10, RPS6KA4, PPARGC1A                                                                                                                                                                                                                                                                                                                                                                                                                                                                                                                                                                                                                 |



|                                                |                   |                                                                                                                                                                                                                                                                                                                                                                                                                                                                                                                                                               |
|------------------------------------------------|-------------------|---------------------------------------------------------------------------------------------------------------------------------------------------------------------------------------------------------------------------------------------------------------------------------------------------------------------------------------------------------------------------------------------------------------------------------------------------------------------------------------------------------------------------------------------------------------|
| Reproductive System Disease                    | 8.56E-06-1.57E-02 | MALAT1, MAGED1, JAK1, TGFBF1, F2R, SGK1, EIF1, CDKN2C, MAP4K4, CCND1, SOX2, USP7, CAMK2D, SOD2, CRIP1, AIRE, CAV1, FOSL2, ATF4, TXN, SERPINE1, TIMP2, ETS1, PTPRE, KCNK2, ITGA6, ANO6, TBK1, OVGP1, BUB1B, C10ORF81, ATAD2, CLCN5, PTPN11, FH, TMSB10, PRDX2, CD151, DCBLD2, SULF1, GADD45B, CDC20, PTPN14, CTNNA1, RARRES1, ETS2, CASP4, NGF, PHKA2, SGMS1, PDCCD4, PTMA, MGAT3, RASSF1, NFKBIA, HSP90AB1, PLK2, VCP, LY6E, NEK7, CHEK2, LASP1, OPRS1, PARVA, TUBB2C, ABCG2, VIM, DLC1, GNAI2, SEMA3A, PRKAR2B, NTRK3, CXXC5, RIPK3, FLII, TXNDC17, CASP8AP2 |
| Cellular Movement                              | 1.15E-05-1.39E-02 | DPYSL2, JAK1, TGFBF1, F2R, CCNB2, MAP4K4, NEXN, TUBB, CCND1, PVR, PEM, MYLK, NR2F1, SOD2, AIRE, CAV1, FOSL2, CAST, TXN, SERPINE1, TIMP2, ETS1, PON2, ITGA6, PIP5K1A, NR1D1, PTPN11, PLCB3, NUAQ1, CTTN, CD151, DCBLD2, SULF1, S100A6, PTPN14, RARRES1, ETS2, NGF, PDCCD4, MGAT3, NFKBIA, RASSF1, HSP90AB1, LASP1, LIMS2, NRP2, TUBB2C, G6PD, VIM, DLC1, GNAI2, CHST1, SEMA3A, SREBF1, NDE1, ZEB2, ADAM10                                                                                                                                                      |
| Cellular Development                           | 1.53E-05-1.47E-02 | DPYSL2, MAGED1, JAK1, TGFBF1, F2R, PBX1, DNAJC3, MAP4K4, CCND1, PVR, SOX2, NR2F1, SOD2, AIRE, CAV1, ATF4, FOSL2, CHD1 (includes EG:1105), DAG1, CAST, SERPINE1, TIMP2, ETS1, ITGA6, LMNA, KAT2B, PIP5K1A, PATZ1, PTPN11, NR1D1, SF1, RUNX1, CTTN, PRDX2, CD151, S100A6, GADD45B, CNTF, PTPN14, CTNNA1, ETS2, NGF, TWSG1, H2AFZ, PTMA, MAFG, DHCR7, NFKBIA, PTGFRN, RASSF1, BRD4, ACADM, PLSCR1, OPRS1, PARVA, VEZF1, NRP2, KHDRBS1, AP3D1, G6PD, P2RX7, DLC1, SEMA3A, PRKAR2B, SREBF1, NTRK3, ADAM10, SKIL, PPARGC1A                                          |
| Connective Tissue Development and Function     | 1.53E-05-1.35E-02 | GADD45B, F2R, PRDX1, PBX1, NGF, CCND1, PTMA, PCOLCE, RASSF1, NFKBIA, CAV1, BRD4, FOSL2, CAST, SERPINE1, KHDRBS1, LMNA, P2RX7, GGT1, PIP5K1A, PRKAR2B, PTPN11, SREBF1, NTRK3, SKIL, PPARGC1A                                                                                                                                                                                                                                                                                                                                                                   |
| Respiratory Disease                            | 1.82E-05-9.13E-03 | MALAT1, MAGED1, GADD45B, PSRC1, CDC20, TUBB2C, PRDX1, TKT, CCNB2, CDKN2C, MAP4K4, BUB1B, TUBB, DLC1, RASSF1, SOD2, HSP90AB1, PTPN11, EEF1A1, CAV1, CHEK2                                                                                                                                                                                                                                                                                                                                                                                                      |
| Cell Morphology                                | 1.93E-05-1.55E-02 | DPYSL2, PHLDA1, F2R, PBX1, DNAJC3, CCND1, PVR, NR2F1, MYLK, MXD3, SOD2, CAV1, CAST, TXN, SERPINE1, TIMP2, ETS1, PTPRE, ITGA6, LMNA, NEDD4, PIP5K1A, PTPN11, LIMA1, PLCB3, RSU1, RUNX1, CTTN, CD151, SULF1, PRDX1, CNTF, PTPN14, CTNNA1, ETS2, NGF, PDCCD4, MGAT3, HMOX1, NFKBIA, RASSF1, PTGFRN, BRD4, ASPH, PLSCR1, PARVA, NRP2, G6PD, VIM, P2RX7, DLC1, SEMA3A, PRKAR2B, ANXA6, NTRK3, ADAM10, CDGAP, SKIL, PPARGC1A                                                                                                                                        |
| Cell Cycle                                     | 4.2E-05-1.59E-02  | SULF1, MAGED1, GADD45B, CDC20, SGK1, CDKN2C, NGF, TUBB, WDR6 (includes EG:11180), CCND1, PVR, SOX2, HMOX1, SOD2, NFKBIA, RASSF1, MXD3, CAMK2D, PLK2, BRD4, CAV1, FOSL2, TXN, CAST, CHEK2, TIMP2, PSRC1, KHDRBS1, LMNA, RAD54L, RPL23, BUB1B, HSPA8, GNAI2, KAT2B, PTPN11, NTRK3, NDE1, ANAPC5, SKIL, RUNX1                                                                                                                                                                                                                                                    |
| Molecular Transport                            | 6.22E-05-1.47E-02 | F2R, PRDX1, CNTF, NGF, SGMS1, MTTP, MGAT3, HMOX1, CAMK2D, NFKBIA, SOD2, GLB1, ACSL5, CAV1, TXN, PLSCR1, FAAH, LRP10, CPT1A, PON2, GM2A, ABCG2, SCD2, P2RX7, GGT1, GNAI2, KPNB1, PIP5K1A, PTPN11, SREBF1, EEF1A1, PLCB3, PRDX2, PPARGC1A                                                                                                                                                                                                                                                                                                                       |
| Cellular Assembly and Organization             | 6.44E-05-1.55E-02 | DPYSL2, TGFBF1, F2R, SGK1, CNTF, PTPN14, IDE, TUBB, NGF, CCND1, PVR, HOOK3, SOD2, RASSF1, STMN4, EHD2, ABCC8, CAV1, DAG1, ARSB, CAST, TXN, SERPINE1, LASP1, PARVA, PSRC1, PACSIN2, ITGA6, LMNA, VIM, BACE1, MAN2A1, P2RX7, DLC1, GNAI2, SEMA3A, PIP5K1A, ANXA6, PTPN11, NTRK3, LIMA1, EEF1A1, ADAM10, FLII, RSU1, CTTN, TMSB10, PPARGC1A                                                                                                                                                                                                                      |
| Organismal Development                         | 8.87E-05-1.35E-02 | TGFBF1, F2R, CNTF, PBX1, CTNNA1, CCNB2, TWSG1, CCND1, H2AFZ, MTTP, PCOLCE, MAFG, HMOX1, NFKBIA, GLB1, PLK2, BRD4, CAV1, FOSL2, ATF4, LY6E, ASPH, SERPINE1, TIMP2, FAAH, PON2, NRP2, TKT, TRIM28, PTCH1, ITGA6, LMNA, MAN2A1, NEDD4, KAT2B, PIP5K1A, LUC7L, PTPN11, ZEB2, ADAM10, SF1, FLII, RUNX1                                                                                                                                                                                                                                                             |
| Cell Signaling                                 | 1.23E-04-1.47E-02 | LITAF, TGFBF1, GADD45B, JAK1, F2R, CNTF, TBK1, MAP4K4, P2RX7, NGF, GNAI2, HMOX1, CAMK2D, PLK2, CXXC5, CAV1, RIPK3, RPS6KA4, TIMP2                                                                                                                                                                                                                                                                                                                                                                                                                             |
| Metabolic Disease                              | 1.48E-04-1.14E-02 | SGK1, CNTF, CA13, IDE, CCND1, MTTP, HMOX1, DHCR7, SOD2, NFKBIA, GLB1, VCP, ABCC8, ARSB, TXN, SERPINE1, ACADM, FAAH, CTNS, ETS1, CPT1A, LMNA, GLUD1, MUT, CBLB, SREBF1, FH, IVD, SUOX, MGAT2, HADH, PPARGC1A                                                                                                                                                                                                                                                                                                                                                   |
| Developmental Disorder                         | 2.57E-04-5.08E-03 | S100A6, F2R, CNTF, PBX1, DNAJC3, NGF, TWSG1, CCND1, H2AFZ, SOX2, HMOX1, DHCR7, NFKBIA, CAV1, FOSL2, ATF4, ASPH, TXN, DAG1, SERPINE1, OPRS1, PTCH1, ITGA6, LMNA, BUB1B, GGT1, GNAI2, PTPN11, CRTAP, SREBF1, SF1                                                                                                                                                                                                                                                                                                                                                |
| Endocrine System Disorders                     | 2.83E-04-7.96E-03 | MAGED1, PRDX1, CNTF, G6PD, GLUD1, IDE, NGF, CCND1, SOD2, NFKBIA, SREBF1, GLB1, ABCC8, HADH, PRDX2                                                                                                                                                                                                                                                                                                                                                                                                                                                             |
| Hepatic System Disease                         | 2.83E-04-1.47E-02 | FAAH, SLC25A4, GADD45B, CPT1A, TUBB2C, ABCG2, CNTF, TBK1, MUT, NGF, GGT1, CCND1, MTTP, HMOX1, SOD2, PTPN11, SREBF1, BICC1, TIMP2                                                                                                                                                                                                                                                                                                                                                                                                                              |
| Cellular Compromise                            | 3.07E-04-1.09E-02 | JAK1, SGK1, IDE, RNF26, SFXN3, SOD2, ASXL2, CAV1, CAST, TXN, DAG1, SERPINE1, TIMP2, PON2, GABPB2, GM2A, LMNA, BACE1, TBK1, NEDD4, LIMA1, CTTN, ANAPC2, PRDX1, CNTF, ETS2, MAFG, HMOX1, RASSF1, RNPS1, STMN4, PTDSS1, FAAH, PARVA, KHDRBS1, AP3D1, VIM, P2RX7, KPNB1, SEMA3A, CHST1, NTRK3, TRIM44, ADAM10, FLII, CAD, MAT2A, RTN3, PPARGC1A                                                                                                                                                                                                                   |
| Dermatological Diseases and Conditions         | 3.31E-04-8.61E-03 | ANAPC2, KHDRBS1, ITGA6, ETS2, CCND1, SFXN3, NEDD4, KPNB1, CHST1, NFKBIA, RNPS1, TRIM44, ZEB2, PTDSS1, CAD, MAT2A, RTN3, CD151                                                                                                                                                                                                                                                                                                                                                                                                                                 |
| Nervous System Development and Function        | 3.31E-04-1.55E-02 | DPYSL2, TGFBF1, F2R, SGK1, ITM2B, CNTF, CTNNA1, NGF, TWSG1, NR2F1, SOX2, SOD2, MXD3, ARSB, TXN, DAG1, SERPINE1, CTNS, OPRS1, PTPRE, NRP2, SH3GL3, CHERP, ITGA6, VIM, BACE1, DLC1, GNAI2, SEMA3A, PIP5K1A, KLF7, NDUFV2, PTPN11, NR1D1, NTRK3, NDE1, ZEB2, ADAM10, PLCB3, RSU1, RUNX1                                                                                                                                                                                                                                                                          |
| Tumor Morphology                               | 3.31E-04-1.09E-02 | PTPRE, F2R, CLCA1 (includes EG:12722), PTCH1, PBX1, CDKN2C, BUB1B, CCND1, MGAT3, NFKBIA, RASSF1, CAV1, SKIL, SERPINE1, CD151                                                                                                                                                                                                                                                                                                                                                                                                                                  |
| Cardiovascular System Development and Function | 3.51E-04-1.09E-02 | ETS1, TGFBF1, F2R, KCNK2, G6PD, LMNA, HMOX1, SEMA3A, CAMK2D, CAV1, SERPINE1, CD151, TIMP2                                                                                                                                                                                                                                                                                                                                                                                                                                                                     |
| Organ Morphology                               | 3.51E-04-5.43E-03 | MYLK, CAMK2D, NRP2, F2R, CAV1, SCD2, LMNA, GGT1, SERPINE1, CCND1, TIMP2                                                                                                                                                                                                                                                                                                                                                                                                                                                                                       |
| Protein Folding                                | 3.97E-04-3.97E-04 | HSPA8, FKBP9, ERP29, HSP90AB1, TBCA, ERO1L, TXN                                                                                                                                                                                                                                                                                                                                                                                                                                                                                                               |
| Protein Synthesis                              | 4.48E-04-1.58E-02 | ANAPC2, PHLDA1, DGKD (includes EG:8527), CDC20, CNTF, CTNNA1, EIF1, RPL31, CASP4, IDE, H2AFZ, CCND1, PCOLCE, PDCCD4, VCP, CAV1, RNF128, CAST, SERPINE1, TIMP2, BACE1, RPL23A (includes EG:6147), P2RX7, NEDD4, RPL37, CBLB, PTPN11, ANAPC5, EEF1A1, IVD, RPL41                                                                                                                                                                                                                                                                                                |
| DNA Replication, Recombination, and Repair     | 4.54E-04-6.54E-03 | PTPRE, F2R, SGK1, CNTF, RAD54L, CDKN2C, OVGP1, NGF, CCND1, GNAI2, NFKBIA, RASSF1, SOD2, PTPN11, NTRK3, VCP, CAV1, FEN1, CHEK2, TIMP2                                                                                                                                                                                                                                                                                                                                                                                                                          |
| Tissue Morphology                              | 5.21E-04-1.4E-02  | F2R, CNTF, G6PD, P2RX7, NGF, PCOLCE, GNAI2, MYLK, HMOX1, PIP5K1A, PRKAR2B, KLF7, CAMK2D, ANXA6, NTRK3, CAV1, FLII, DAG1, ASPH, SERPINE1, PPARGC1A                                                                                                                                                                                                                                                                                                                                                                                                             |
| Embryonic Development                          | 5.35E-04-1.35E-02 | ANAPC2, TGFBF1, CTNNA1, PBX1, ETS2, CCNB2, MAP4K4, TWSG1, CCND1, SFXN3, MAFG, SOX2, RASSF1, MXD3, RNPS1, PTDSS1, LY6E, ASPH, DAG1, CHEK2, KHDRBS1, NRP2, PTCH1, MAN2A1, NEDD4, KPNB1, CHST1, NDE1, TRIM44, ZEB2, ADAM10, RUNX1, CAD, MAT2A, RTN3                                                                                                                                                                                                                                                                                                              |

|                                                       |                   |                                                                                                                                                                                                                                                                                                                                                                                                   |
|-------------------------------------------------------|-------------------|---------------------------------------------------------------------------------------------------------------------------------------------------------------------------------------------------------------------------------------------------------------------------------------------------------------------------------------------------------------------------------------------------|
| Infectious Disease                                    | 5.35E-04-3.26E-03 | ANAPC2, PARVA, JAK1, KHDRBS1, GABPB2, GM2A, ETS2, TBK1, RNF26, NEDD4, SFXN3, KPNB1, CHST1, RNPS1, ASXL2, TRIM44, ADAM10, CAV1, PTDSS1, FLII, DAG1, CAD, MAT2A, RTN3                                                                                                                                                                                                                               |
| Cell-To-Cell Signaling and Interaction                | 5.47E-04-1.27E-02 | DPYSL2, SULF1, JAK1, PRDX1, CNTF, PTPN14, NGF, CCND1, PTMA, HMOX1, SOD2, CAV1, ABCC8, ARSB, VEZF1, ABCG2, ITGA6, G6PD, VIM, GNAI2, CBLB, PRKAR2B, NTRK3, RSU1, SUOX, PRDX2, CD151                                                                                                                                                                                                                 |
| Organismal Injury and Abnormalities                   | 5.81E-04-8.61E-03 | ETS1, HMOX1, NFKBIA, SOD2, CNTF, LMNA, NGF, SERPINE1, PLSCR1                                                                                                                                                                                                                                                                                                                                      |
| Immune Cell Trafficking                               | 6.55E-04-1.39E-02 | DPYSL2, PON2, JAK1, F2R, ITGA6, NGF, CCND1, PVR, MYLK, GNAI2, CHST1, SEMA3A, NFKBIA, SREBF1, ADAM10, PLCB3, CAST, TXN, SERPINE1, TIMP2, CD151                                                                                                                                                                                                                                                     |
| Connective Tissue Disorders                           | 6.75E-04-1.36E-02 | FAAH, ETS1, F2R, PBX1, G6PD, TBK1, NGF, NEDD4, CCND1, PTPN11, NTRK3, CAV1, DAG1, CAST, RUNX1, ASPH, TIMP2                                                                                                                                                                                                                                                                                         |
| Drug Metabolism                                       | 7.29E-04-7.29E-04 | CTNS, SOD2, G6PD, GGT1                                                                                                                                                                                                                                                                                                                                                                            |
| Protein Degradation                                   | 7.6E-04-6.74E-03  | ANAPC2, CDC20, BACE1, CASP4, P2RX7, IDE, NEDD4, PCOLCE, CBLB, VCP, ANAPC5, CAST, SERPINE1, TIMP2                                                                                                                                                                                                                                                                                                  |
| Nucleic Acid Metabolism                               | 9.8E-04-4.68E-03  | SOD2, GLB1, FAR1, IDE, ELOVL6                                                                                                                                                                                                                                                                                                                                                                     |
| Skeletal and Muscular Disorders                       | 9.8E-04-1.54E-02  | SEPN1 (includes EG:57190), ANAPC2, GADD45B, PRDX1, CNTF, CA13, IDE, NGF, PTMA, SOD2, NFKBIA, VCP, KIF21A, HLA-B, DAG1, TXN, SERPINE1, CHEK2, ETS1, FAAH, NONO, TUBB2C, VIM, LMNA, P2RX7, GGT1, GNAI2, CLCN5, HSPA8, CRTAP, RUNX1, PRDX2, PPARGC1A                                                                                                                                                 |
| Skeletal and Muscular System Development and Function | 9.8E-04-1.47E-02  | SULF1, JAK1, F2R, CNTF, ITGA6, LMNA, TWSG1, GNAI2, MYLK, NFKBIA, ANXA6, CAMK2D, CAV1, FOSL2, FLII, CAST, DAG1, ASPH, GADD45B, F2R, CNTF, PBX1, CTNNA1, ETS2, MAP4K4, NGF, TWSG1, SOX2, HMOX1, NFKBIA, CAV1, ATF4, LY6E, FOSL2, CAST, ARSB, DAG1, SERPINE1, TIMP2, ARHGAP22, NRP2, PTCH1, ITGA6, BACE1, P2RX7, GGT1, GNAI2, SEMA3A, LUC7L, NDUFV2, PTPN11, SREBF1, NTRK3, PLCB3, FLII, FEN1, RUNX1 |
| Tissue Development                                    | 9.8E-04-1.58E-02  |                                                                                                                                                                                                                                                                                                                                                                                                   |
| Amino Acid Metabolism                                 | 1.01E-03-1.58E-02 | PTPRE, TGFBF1, JAK1, SGK1, PTPN14, GLUD1, MAP4K4, P2RX7, CCND1, PHKA2, MYLK, KAT2B, PRKAR2B, PTPN11, BRD4, ADAM10, RPS6KA4, CHEK2                                                                                                                                                                                                                                                                 |
| Cell-mediated Immune Response                         | 1.05E-03-1.88E-03 | CBLB, DPYSL2, GNAI2, SEMA3A, AIRE, HLA-B, ITGA6, ADAM10, PLCB3, TIMP2                                                                                                                                                                                                                                                                                                                             |
| Hematological System Development and Function         | 1.17E-03-1.39E-02 | TGFBF1, JAK1, F2R, PBX1, NGF, TWSG1, CCND1, PVR, MYLK, SOD2, NFKBIA, AIRE, HLA-B, CAV1, TXN, CAST, SERPINE1, TIMP2, PLSCR1, ETS1, PON2, AP3D1, G6PD, CBLB, GNAI2, CHST1, SEMA3A, PATZ1, PTPN11, SREBF1, ADAM10, PLCB3, RUNX1, CD151, PRDX2                                                                                                                                                        |
| Free Radical Scavenging                               | 1.17E-03-1.07E-02 | ETS1, JAK1, PON2, SOD2, F2R, PRDX1, P2RX7, TXN, NGF, GGT1                                                                                                                                                                                                                                                                                                                                         |
| Cardiovascular Disease                                | 1.57E-03-1.35E-02 | S100A6, TGFBF1, F2R, CA13, CTNNA1, DNAJC3, NGF, H2AFZ, CCND1, HMOX1, SOD2, NFKBIA, CAV1, ABCC8, CAST, TXN, SERPINE1, TIMP2, ETS1, OPRS1, TUBB2C, PTCH1, LMNA, GNAI2, PTPN11, GPD1L, PPARGC1A, EPHX1                                                                                                                                                                                               |
| Renal and Urological Disease                          | 1.8E-03-9.13E-03  | ANAPC2, SGK1, CA13, ETS2, CCND1, SFXN3, HMOX1, NFKBIA, RNPS1, BICC1, PTDSS1, SERPINE1, TIMP2, CTNS, OPRS1, KHDRBS1, TUBB2C, PTCH1, NEDD4, CLCN5, KPNB1, CHST1, SREBF1, TRIM44, MAT2A, CAD, FH, RTN3, CD151                                                                                                                                                                                        |
| Hair and Skin Development and Function                | 1.88E-03-8.61E-03 | MAGED1, NFKBIA, SOD2, ABCG2, CLCA1 (includes EG:12722), PTCH1, PBX1, CCND1, CHEK2, PTMA                                                                                                                                                                                                                                                                                                           |
| Hematopoiesis                                         | 1.88E-03-1.88E-03 | SEMA3A, ITGA6, TIMP2                                                                                                                                                                                                                                                                                                                                                                              |
| Lymphoid Tissue Structure and Development             | 2.04E-03-2.04E-03 | TGFBF1, PBX1, CCNB2, PRDX2                                                                                                                                                                                                                                                                                                                                                                        |
| Organ Development                                     | 2.04E-03-1.57E-02 | TGFBF1, PBX1, ETS2, CDKN2C, CCNB2, NGF, TWSG1, CCND1, SOX2, NR2F1, DHCR7, CAMK2D, SOD2, HSP90AB1, LY6E, FOSL2, TXN, ACADM, TIMP2, CTNS, NRP2, ITGA6, MAN2A1, DLC1, PTPN11, NTRK3, NDE1, RUNX1, PRDX2                                                                                                                                                                                              |
| Protein Trafficking                                   | 2.04E-03-2.04E-03 | KPNB1, NFKBIA, SOD2, F2R                                                                                                                                                                                                                                                                                                                                                                          |
| Immunological Disease                                 | 2.31E-03-1.11E-02 | PRIM1, JAK1, GADD45B, PRDX1, EIF1, PBX1, CDKN2C, CASP4, IDE, TWSG1, TUBB, NGF, SGMS1, PTMA, SOD2, NFKBIA, AIRE, GLB1, HLA-B, ABCC8, TXN, CHEK2, ETS1, CPT1A, NONO, TKT, VIM, GGT1, CBLB, HSPA8, RUNX1, SKIL, PRDX2                                                                                                                                                                                |
| Ophthalmic Disease                                    | 3.19E-03-3.19E-03 | FAAH, KIF21A                                                                                                                                                                                                                                                                                                                                                                                      |
| Respiratory System Development and Function           | 3.19E-03-3.19E-03 | NFKBIA, TGFBF1                                                                                                                                                                                                                                                                                                                                                                                    |
| Inflammatory Response                                 | 3.37E-03-7.08E-03 | GNAI2, SEMA3A, F2R, PLCB3, CAST, TIMP2                                                                                                                                                                                                                                                                                                                                                            |
| Carbohydrate Metabolism                               | 3.67E-03-1.35E-02 | CHST1, CPT1A, PTPN11, SREBF1, TKT, PTCH1, EEF1A1, G6PD, MAN1A2, MAN2A1, NGF, PPARGC1A                                                                                                                                                                                                                                                                                                             |
| Reproductive System Development and Function          | 5.43E-03-5.43E-03 | NRP2, GGT1, CCND1                                                                                                                                                                                                                                                                                                                                                                                 |
| Hepatic System Development and Function               | 6.54E-03-1.57E-02 | MGAT3, SOD2, BRD4, MAN2A1, RUNX1, ACADM                                                                                                                                                                                                                                                                                                                                                           |
| Organismal Functions                                  | 8.61E-03-8.61E-03 | CNTF, SERPINE1                                                                                                                                                                                                                                                                                                                                                                                    |
| RNA Post-Transcriptional Modification                 | 9.51E-03-9.51E-03 | NONO, RNPS1, PPIG, RBMS1, DDX17, PPARGC1A                                                                                                                                                                                                                                                                                                                                                         |
| Nutritional Disease                                   | 1.04E-02-1.04E-02 | SREBF1, CNTF, ABCC8, SERPINE1                                                                                                                                                                                                                                                                                                                                                                     |
| Endocrine System Development and Function             | 1.09E-02-1.35E-02 | MAGED1, PBX1, LY6E, CCND1                                                                                                                                                                                                                                                                                                                                                                         |
| Renal and Urological System Development and Function  | 1.09E-02-1.09E-02 | SOD2, CLCA1 (includes EG:12722)                                                                                                                                                                                                                                                                                                                                                                   |
| Vitamin and Mineral Metabolism                        | 1.47E-02-1.47E-02 | CAMK2D, F2R, P2RX7, NGF                                                                                                                                                                                                                                                                                                                                                                           |
| Digestive System Development and Function             | 1.57E-02-1.57E-02 | SOD2, MAN2A1, RUNX1, ACADM                                                                                                                                                                                                                                                                                                                                                                        |

**Table S7B.**

| Ingenuity Canonical Pathways  | P-value     | Molecules                    |
|-------------------------------|-------------|------------------------------|
| Glycosaminoglycan Degradation | 0.000190546 | SULF1, GLB1, IDS, GM2A, ARSB |

|                                         |             |                                                                         |
|-----------------------------------------|-------------|-------------------------------------------------------------------------|
| NRF2-mediated Oxidative Stress Respo    | 0.000204174 | HMOX1, SOD2, ERP29, PRDX1, VCP, DNAJC3, ATF4, DNAJC10, TXN, EPHX1, MAFG |
| N-Glycan Degradation                    | 0.001348963 | GLB1, GM2A, MAN2A1, MAN1A2                                              |
| N-Glycan Biosynthesis                   | 0.001737801 | STT3B, MGAT3, MAN2A1, MAN1A2, MGAT2                                     |
| Endoplasmic Reticulum Stress Pathway    | 0.003981072 | DNAJC3, ATF4, MBTPS2                                                    |
| Valine, Leucine and Isoleucine Degradat | 0.005011872 | IWS1, MUT, IVD, ACADM, HADH                                             |
| GM-CSF Signaling                        | 0.005011872 | ETS1, CAMK2D, PTPN11, RUNX1, CCND1                                      |
| CNTF Signaling                          | 0.010471285 | JAK1, PTPN11, CNTF, RPS6KA4                                             |
| Selenoamino Acid Metabolism             | 0.011481536 | MAT2A, GGT1, SCLY                                                       |
| $\beta$ -alanine Metabolism             | 0.012022644 | DPYSL2, IWS1, IVD, ACADM                                                |
| Fatty Acid Metabolism                   | 0.012589254 | CPT1A, IWS1, ACSL5, IVD, ACADM, HADH                                    |
| Glycerophospholipid Metabolism          | 0.013489629 | HMOX1, DGKD (includes EG:8527), GPD1L, LPCAT1, PLCB3, PISD              |
| Protein Ubiquitination Pathway          | 0.015135612 | ANAPC2, HSPA8, USP7, PSME1, CDC20, HLA-B, ANAPC5, NEDD4                 |
| Sphingolipid Metabolism                 | 0.015848932 | SULF1, GLB1, ARSB, SGMS1                                                |
| PPAR Signaling                          | 0.019498446 | NR2F1, NFKBIA, HSP90AB1, MAP4K4, PPARGC1A                               |
| Propanoate Metabolism                   | 0.019952623 | IWS1, MUT, IVD, ACADM                                                   |
| Phenylalanine Metabolism                | 0.019952623 | FAAH, PRDX1, PRDX2                                                      |
| IL-10 Signaling                         | 0.022387211 | HMOX1, JAK1, NFKBIA, MAP4K4                                             |
| $\alpha$ -Adrenergic Signaling          | 0.023442288 | GNAI2, PRKAR2B, HLA-B, PYGB, PHKA2                                      |
| Pentose Phosphate Pathway               | 0.023442288 | PRPS2, TKT, G6PD                                                        |
| PPAR $\alpha$ /RXR $\alpha$ Activation  | 0.025118864 | PRKAR2B, TGFBR1, NFKBIA, HSP90AB1, PLCB3, MAP4K4, PPARGC1A              |
| Insulin Receptor Signaling              | 0.025118864 | PRKAR2B, JAK1, PTPN11, PPP1R10, SGK1, HLA-B                             |
| Glutamate Metabolism                    | 0.025703958 | GLUD1, CAD, QARS                                                        |
| Methane Metabolism                      | 0.02630268  | PRDX1, PRDX2                                                            |
| Neurotrophin/TRK Signaling              | 0.027542287 | PTPN11, NTRK3, ATF4, NGF                                                |
| Huntington's Disease Signaling          | 0.029512092 | HSPA8, SGK1, SH3GL3, ATF4, PLCB3, CASP4, NGF, NAPB                      |
| Cell Cycle: G2/M DNA Damage Checkp      | 0.031622777 | KAT2B, CCNB2, CHEK2                                                     |
| Cyanoamino Acid Metabolism              | 0.033884416 | FAAH, GGT1                                                              |
| Melatonin Signaling                     | 0.033884416 | GNAI2, PRKAR2B, CAMK2D, PLCB3                                           |
| Caveolar-mediated Endocytosis           | 0.037153523 | CAV1, HLA-B, ITGA6, PTRF                                                |
| Synaptic Long Term Potentiation         | 0.041686938 | PRKAR2B, CAMK2D, PPP1R10, ATF4, PLCB3                                   |
| Stilbene, Coumarine and Lignin Biosynt  | 0.050118723 | PRDX1, PRDX2                                                            |
| PI3K/AKT Signaling                      | 0.05370318  | JAK1, NFKBIA, HSP90AB1, HLA-B, CCND1                                    |

**Table S8. GeneChip based dataset of *H. pylori* HPAG1's transcriptional responses to infection of mGEP cells (fdr threshold 0.05).**

| <b>HPAG1<br/>GeneChip<br/>probeset</b> | <b>fold-change</b> | <b>gene symbol</b> | <b>gene description</b>                           |
|----------------------------------------|--------------------|--------------------|---------------------------------------------------|
| HPAG1_0038                             | 8.4                |                    | comB9 competence protein                          |
| HPAG1_0017                             | 6.5                |                    | ATPase/DNA transfer protein                       |
| HPAG1_0037                             | 5.2                |                    | comB8 competence protein                          |
| HPAG1_0016                             | 4.4                |                    | hypothetical protein                              |
| HPAG1_1157                             | 3.6                |                    | hypothetical protein                              |
| HPAG1_0015                             | 3.5                |                    | hypothetical protein                              |
| HPAG1_0258                             | 3.3                |                    | hypothetical protein                              |
| HPAG1_0475                             | 3.1                |                    | phospholipase A1                                  |
| HPAG1_1106                             | 2.9                |                    | outer membrane protein HofH                       |
| HPAG1_0966                             | 2.9                |                    | hypothetical protein                              |
| HPAG1_1343                             | 2.9                |                    | hypothetical protein                              |
| HPAG1_1366                             | 2.7                |                    | hypothetical protein                              |
| HPAG1_0645                             | 2.7                |                    | hypothetical protein                              |
| HPAG1_1317                             | 2.6                |                    | rod shape-determining protein                     |
| HPAG1_1143                             | 2.5                | secE               | preprotein translocase subunit SecE               |
| HPAG1_0140                             | 2.5                |                    | A/G-specific adenine glycosylase                  |
| HPAG1_1158                             | 2.4                |                    | glycinamide ribonucleotide synthetase             |
| HPAG1_1156                             | 2.4                |                    | organic solvent tolerance protein                 |
| HPAG1_0310                             | 2.3                |                    | hypothetical protein                              |
| HPAG1_0523                             | 2.3                |                    | cag pathogenicity island protein B                |
| HPAG1_1023                             | 2.3                |                    | putative type II DNA modification enzyme          |
| HPAG1_1223                             | 2.3                |                    | nicotinamide mononucleotide transporter           |
| HPAG1_1113                             | 2.3                |                    | glucose/galactose transporter                     |
| HPAG1_1519                             | 2.3                |                    | hypothetical protein                              |
| HPAG1_0252                             | 2.3                |                    | hypothetical protein                              |
| HPAG1_0572                             | 2.2                |                    | hypothetical protein                              |
| HPAG1_0633                             | 2.2                |                    | UDP-N-acetylglucosamine 1-carboxyvinyltransferase |
| HPAG1_0108                             | 2.2                |                    | hypothetical protein                              |
| <b>HPAG1_0009</b>                      | <b>2.2</b>         |                    | <b>outer membrane protein HopZ</b>                |
| HPAG1_1377                             | 2.2                |                    | hypothetical protein                              |
| HPAG1_0527                             | 2.2                |                    | glutamate racemase                                |
| HPAG1_0464                             | 2.2                |                    | hypothetical protein                              |
| HPAG1_1378                             | 2.1                | trmE               | tRNA modification GTPase TrmE                     |
| HPAG1_1174                             | 2.1                |                    | dihydropteroate synthase                          |
| HPAG1_0481                             | 2.1                |                    | hypothetical protein                              |
| HPAG1_0390                             | 2.0                |                    | hypothetical protein                              |
| HPAG1_0227                             | 2.0                |                    | hypothetical protein                              |
| HPAG1_0987                             | 2.0                |                    | nifS-like protein                                 |
| HPAG1_1323                             | 2.0                |                    | flagellar assembly protein FliW                   |
| HPAG1_0313                             | 1.9                |                    | type II restriction enzyme                        |
| HPAG1_0657                             | 1.9                |                    | hypothetical protein                              |
| HPAG1_0531                             | 1.9                |                    | hypothetical protein                              |
| HPAG1_0899                             | 1.9                |                    | hypothetical protein                              |
| HPAG1_0986                             | 1.9                |                    | hypothetical protein                              |
| HPAG1_0532                             | 1.8                |                    | hypothetical protein                              |
| HPAG1_0976                             | 1.8                |                    | hypothetical protein                              |
| HPAG1_0658                             | 1.8                |                    | integrase-recombinase protein                     |
| HPAG1_1502                             | 1.7                |                    | ATP-dependent nuclease                            |
| HPAG1_1084                             | 1.7                |                    | hypothetical protein                              |
| HPAG1_0955                             | 1.7                |                    | phosphoglyceromutase                              |
| HPAG1_1279                             | 1.7                |                    | hypothetical protein                              |
| HPAG1_0425                             | 1.7                |                    | hypothetical protein                              |
| HPAG1_1342                             | 1.7                |                    | lipopolysaccharide 1,2-glucosyltransferase        |
| HPAG1_0492                             | 1.7                |                    | hypothetical protein                              |
| HPAG1_1369                             | 1.7                |                    | 4-diphosphocytidyl-2-C-methyl-D-erythritol kinase |

|            |      |      |                                                             |
|------------|------|------|-------------------------------------------------------------|
| HPAG1_1508 | 1.7  | flgB | flagellar basal body rod protein FlgB                       |
| HPAG1_1318 | 1.7  |      | rod shape-determining protein                               |
| HPAG1_0692 | 1.7  | mraW | S-adenosyl-methyltransferase MraW                           |
| HPAG1_0744 | 1.6  |      | hypothetical protein                                        |
| HPAG1_0218 | 1.6  |      | beta-1,4-N-acetylgalactosamyltransferase                    |
| HPAG1_1376 | 1.6  |      | putative inner membrane protein translocase component YidC  |
| HPAG1_0606 | 1.6  | murC | UDP-N-acetylmuramate--L-alanine ligase                      |
| HPAG1_0760 | 1.6  |      | penta-phosphate guanosine-3'-pyrophosphohydrolase           |
| HPAG1_0781 | 1.6  |      | outer membrane protein HorG                                 |
| HPAG1_1390 | 1.6  |      | hypothetical protein                                        |
| HPAG1_0975 | 1.6  |      | hypothetical protein                                        |
| HPAG1_1408 | 1.5  |      | hypothetical protein                                        |
| HPAG1_1137 | 1.5  |      | DNA-directed RNA polymerase subunit beta/beta'              |
| HPAG1_0631 | 1.5  |      | UDP-glucose pyrophosphorylase                               |
| HPAG1_0746 | 1.5  |      | hypothetical protein                                        |
| HPAG1_0327 | 1.5  |      | outer membrane protein HorC                                 |
| HPAG1_0224 | 1.5  |      | hypothetical protein                                        |
| HPAG1_1406 | 1.5  |      | sodium/glutamate symport carrier protein/glutamate permease |
| HPAG1_1189 | 1.5  | rpsF | 30S ribosomal protein S6                                    |
| HPAG1_0891 | 1.5  |      | hypothetical protein                                        |
| HPAG1_1523 | 1.4  |      | riboflavin synthase subunit alpha                           |
| HPAG1_1073 | 1.4  |      | F0F1 ATP synthase subunit delta                             |
| HPAG1_0392 | 1.4  |      | hypothetical protein                                        |
| HPAG1_0684 | 1.4  |      | hypothetical protein                                        |
| HPAG1_1071 | 1.4  |      | F0F1 ATP synthase subunit gamma                             |
| HPAG1_0125 | 1.4  | rplT | 50S ribosomal protein L20                                   |
| HPAG1_0793 | 1.4  | acpS | 4'-phosphopantetheinyl transferase                          |
| HPAG1_1238 | 1.4  |      | DNA-directed RNA polymerase subunit alpha                   |
| HPAG1_1320 | 1.4  |      | ATP-dependent protease ATPase subunit                       |
| HPAG1_1507 | 1.3  | flgC | flagellar basal body rod protein FlgC                       |
| HPAG1_1356 | 1.3  | ksgA | dimethyladenosine transferase                               |
| HPAG1_0628 | 1.3  |      | glutamyl-tRNA synthetase                                    |
| HPAG1_0472 | 1.3  |      | hypothetical protein                                        |
| HPAG1_0473 | 1.3  |      | sodium- and chloride-dependent transporter                  |
| HPAG1_1217 | 1.3  |      | NADH dehydrogenase subunit N                                |
| HPAG1_0097 | 1.2  |      | hypothetical protein                                        |
| HPAG1_0053 | 1.1  |      | proline/delta 1-pyrroline-5-carboxylate dehydrogenase       |
| HPAG1_0190 | 1.1  | lpxD | UDP-3-O-[3-hydroxymyristoyl] glucosamine N-acyltransferase  |
| HPAG1_0656 | -1.1 |      | hypothetical protein                                        |
| HPAG1_0069 | -1.2 |      | urease accessory protein UreG                               |
| HPAG1_0691 | -1.2 |      | outer membrane protein HopE                                 |
| HPAG1_1151 | -1.2 |      | iceA1                                                       |
| HPAG1_0234 | -1.2 |      | hypothetical protein                                        |
| HPAG1_1456 | -1.2 |      | hypothetical protein                                        |
| HPAG1_0449 | -1.2 |      | outer membrane protein HorE                                 |
| HPAG1_0822 | -1.2 |      | hypothetical protein                                        |
| HPAG1_0776 | -1.2 |      | cadmium-transporting ATPase                                 |
| HPAG1_0937 | -1.3 |      | hypothetical protein                                        |
| HPAG1_0389 | -1.3 | panB | 3-methyl-2-oxobutanoate hydroxymethyltransferase            |
| HPAG1_0404 | -1.3 |      | putative transcriptional regulator                          |
| HPAG1_0402 | -1.3 |      | acetyl-CoA synthetase                                       |
| HPAG1_1303 | -1.3 |      | quinolinate synthetase                                      |
| HPAG1_0972 | -1.3 |      | arginine decarboxylase                                      |
| HPAG1_0307 | -1.3 |      | hypothetical protein                                        |
| HPAG1_0522 | -1.3 |      | cag pathogenicity island protein C                          |
| HPAG1_0931 | -1.3 |      | hypothetical protein                                        |
| HPAG1_0857 | -1.3 |      | hypothetical protein                                        |
| HPAG1_0182 | -1.3 |      | hypothetical protein                                        |
| HPAG1_0842 | -1.3 |      | ADP-L-glycero-D-mannoheptose-6-epimerase                    |
| HPAG1_0276 | -1.3 |      | hypothetical protein                                        |
| HPAG1_0816 | -1.4 | gatA | aspartyl/glutamyl-tRNA amidotransferase subunit A           |

|            |      |      |                                                                    |
|------------|------|------|--------------------------------------------------------------------|
| HPAG1_0810 | -1.4 |      | thioredoxin                                                        |
| HPAG1_0025 | -1.4 |      | isocitrate dehydrogenase                                           |
| HPAG1_0960 | -1.4 |      | cell division protein FtsZ                                         |
| HPAG1_0895 | -1.4 |      | outer membrane protein HopC                                        |
| HPAG1_1325 | -1.4 |      | ATP-dependent protease                                             |
| HPAG1_1475 | -1.4 |      | outer membrane protein HorL                                        |
| HPAG1_0143 | -1.4 |      | cytochrome c oxidase monoheme subunit                              |
| HPAG1_0747 | -1.4 |      | hypothetical protein                                               |
| HPAG1_0320 | -1.4 |      | outer membrane protein                                             |
| HPAG1_1125 | -1.4 |      | sugar efflux transporter                                           |
| HPAG1_0577 | -1.4 |      | penicillin-binding protein 1A                                      |
| HPAG1_0270 | -1.4 |      | hypothetical protein                                               |
| HPAG1_0267 | -1.4 |      | cytochrome c biogenesis protein                                    |
| HPAG1_0066 | -1.4 |      | ATP-binding protein                                                |
| HPAG1_1460 | -1.4 |      | hypothetical protein                                               |
| HPAG1_1512 | -1.4 |      | alkyl hydroperoxide reductase                                      |
| HPAG1_1133 | -1.4 |      | hypothetical protein                                               |
| HPAG1_0145 | -1.4 |      | cytochrome c oxidase diheme subunit                                |
| HPAG1_0271 | -1.4 |      | putative ATP-binding protein                                       |
| HPAG1_0126 | -1.5 |      | outer membrane protein HorB                                        |
| HPAG1_0652 | -1.5 |      | hypothetical protein                                               |
| HPAG1_0384 | -1.5 | gidB | glucose-inhibited division protein B                               |
| HPAG1_0378 | -1.5 |      | cell division protein                                              |
| HPAG1_0028 | -1.5 |      | hypothetical protein                                               |
| HPAG1_0434 | -1.5 |      | putative zinc protease                                             |
| HPAG1_0113 | -1.5 |      | hypothetical protein                                               |
| HPAG1_0598 | -1.5 | aspS | aspartyl-tRNA synthetase                                           |
| HPAG1_0579 | -1.5 |      | hemolysin secretion protein                                        |
| HPAG1_0409 | -1.5 |      | 3-dehydroquinone dehydratase                                       |
| HPAG1_0095 | -1.5 |      | hypothetical protein                                               |
| HPAG1_0489 | -1.5 |      | ATP-dependent protease peptidase subunit                           |
| HPAG1_1176 | -1.5 |      | hypothetical protein                                               |
| HPAG1_0296 | -1.5 | amiE | acylamide amidohydrolase                                           |
| HPAG1_0461 | -1.6 |      | catalase like protein                                              |
| HPAG1_0457 | -1.6 |      | GTP-binding protein                                                |
| HPAG1_0603 | -1.6 |      | inorganic pyrophosphatase                                          |
| HPAG1_0927 | -1.6 |      | hypothetical protein                                               |
| HPAG1_0096 | -1.6 |      | 2-hydroxyacid dehydrogenase                                        |
| HPAG1_0321 | -1.6 |      | hypothetical protein                                               |
| HPAG1_0821 | -1.6 |      | DNA-binding protein HU                                             |
| HPAG1_1419 | -1.6 | murE | UDP-N-acetylmuramoylalanyl-D-glutamate--2,6-diaminopimelate ligase |
| HPAG1_1458 | -1.6 |      | hypothetical protein                                               |
| HPAG1_0325 | -1.6 |      | poly E-rich protein                                                |
| HPAG1_0407 | -1.6 | rpsO | 30S ribosomal protein S15                                          |
| HPAG1_0752 | -1.6 |      | hypothetical protein                                               |
| HPAG1_0639 | -1.6 |      | hypothetical protein                                               |
| HPAG1_1459 | -1.6 |      | membrane-associated lipoprotein                                    |
| HPAG1_0209 | -1.6 |      | lipopolysaccharide 1,2-glycosyltransferase                         |
| HPAG1_0609 | -1.6 |      | tetrahydrodipicolinate N-succinyltransferase                       |
| HPAG1_0837 | -1.6 |      | ABC transporter, ATP-binding protein                               |
| HPAG1_0911 | -1.6 | surE | stationary phase survival protein SurE                             |
| HPAG1_0089 | -1.6 |      | RNA polymerase sigma factor RpoD                                   |
| HPAG1_0615 | -1.6 |      | quinone-reactive Ni/Fe hydrogenase HydB                            |
| HPAG1_0571 | -1.7 | oorC | 2-oxoglutarate-acceptor oxidoreductase subunit OorC                |
| HPAG1_0110 | -1.7 |      | co-chaperone and heat shock protein 24                             |
| HPAG1_0135 | -1.7 |      | hypothetical protein                                               |
| HPAG1_0041 | -1.7 |      | GDP-D-mannose dehydratase                                          |
| HPAG1_0453 | -1.7 | gltX | glutamyl-tRNA synthetase                                           |
| HPAG1_0146 | -1.7 |      | hypothetical protein                                               |
| HPAG1_0269 | -1.7 |      | chlorohydrolase                                                    |
| HPAG1_0497 | -1.7 |      | cag pathogenicity island protein 3                                 |

|            |      |      |                                                                         |
|------------|------|------|-------------------------------------------------------------------------|
| HPAG1_1250 | -1.7 | rpsH | 30S ribosomal protein S8                                                |
| HPAG1_0858 | -1.7 |      | catalase                                                                |
| HPAG1_1289 | -1.7 |      | outer membrane protein                                                  |
| HPAG1_0445 | -1.7 |      | hypothetical protein                                                    |
| HPAG1_0784 | -1.7 | mogA | molybdenum cofactor biosynthesis protein                                |
| HPAG1_0111 | -1.7 |      | heat-inducible transcription repressor                                  |
| HPAG1_1510 | -1.7 |      | iron(III) ABC transporter, periplasmic iron-binding protein             |
| HPAG1_1447 | -1.7 |      | branched-chain amino acid aminotransferase                              |
| HPAG1_1446 | -1.8 |      | outer membrane protein HorJ                                             |
| HPAG1_1455 | -1.8 | dnaE | DNA polymerase III subunit alpha                                        |
| HPAG1_0565 | -1.8 |      | hypothetical protein                                                    |
| HPAG1_1100 | -1.8 |      | flavodoxin FldA                                                         |
| HPAG1_0002 | -1.8 | ribH | riboflavin synthase subunit beta                                        |
| HPAG1_0319 | -1.8 |      | hypothetical protein                                                    |
| HPAG1_1400 | -1.8 |      | iron-regulated outer membrane protein                                   |
| HPAG1_1350 | -1.8 |      | hypothetical protein                                                    |
| HPAG1_1404 | -1.8 |      | ferredoxin-like protein                                                 |
| HPAG1_0410 | -1.8 |      | proline peptidase                                                       |
| HPAG1_0159 | -1.8 |      | hypothetical protein                                                    |
| HPAG1_0879 | -1.8 |      | hydrogenase expression/formation protein HypC                           |
| HPAG1_0246 | -1.9 |      | neutrophil activating protein                                           |
| HPAG1_0553 | -1.9 |      | ribose-5-phosphate isomerase B                                          |
| HPAG1_0105 | -1.9 |      | S-ribosylhomocysteinase                                                 |
| HPAG1_1119 | -1.9 |      | pyrimidine nucleoside transport protein                                 |
| HPAG1_1328 | -1.9 |      | putative type III restriction enzyme M protein                          |
| HPAG1_1042 | -1.9 |      | mannitol dehydrogenase                                                  |
| HPAG1_0067 | -1.9 |      | ATP-binding protein                                                     |
|            |      |      | tyrosine-regulated 3-deoxy-D-arabino-heptulosonate 7-phosphate synthase |
| HPAG1_0132 | -1.9 |      | molecular chaperone DnaK                                                |
| HPAG1_0109 | -1.9 |      | hypothetical protein                                                    |
| HPAG1_0166 | -1.9 |      | hypothetical protein                                                    |
| HPAG1_0570 | -2.0 | oorB | 2-oxoglutarate-acceptor oxidoreductase subunit OorB                     |
| HPAG1_1004 | -2.0 |      | hypothetical protein                                                    |
| HPAG1_1049 | -2.0 | porA | pyruvate flavodoxin oxidoreductase subunit alpha                        |
| HPAG1_1313 | -2.0 |      | type III restriction enzyme M protein                                   |
| HPAG1_1080 | -2.0 |      | hypothetical protein                                                    |
| HPAG1_0133 | -2.0 |      | hypothetical protein                                                    |
| HPAG1_1053 | -2.0 |      | excinuclease ABC subunit B                                              |
| HPAG1_0768 | -2.0 |      | outer membrane protein HofE                                             |
| HPAG1_1117 | -2.0 |      | purine-nucleoside phosphorylase                                         |
| HPAG1_0938 | -2.0 |      | oxygen-insensitive NADPH nitroreductase                                 |
| HPAG1_0758 | -2.0 |      | hypothetical protein                                                    |
| HPAG1_0872 | -2.0 |      | hypothetical protein                                                    |
| HPAG1_1118 | -2.0 |      | phosphopentomutase                                                      |
| HPAG1_0662 | -2.0 |      | ribonucleotide-diphosphate reductase subunit alpha                      |
| HPAG1_0083 | -2.0 |      | methyl-accepting chemotaxis protein                                     |
| HPAG1_1330 | -2.0 |      | biotin synthase                                                         |
| HPAG1_0372 | -2.0 |      | hypothetical protein                                                    |
| HPAG1_1267 | -2.0 |      | hypothetical protein                                                    |
| HPAG1_1050 | -2.0 |      | ferredoxin oxidoreductase beta subunit                                  |
| HPAG1_0524 | -2.1 |      | cytotoxin-associated protein A                                          |
| HPAG1_0869 | -2.1 |      | iron(III) dicitrate ABC transporter, ATP-binding protein                |
| HPAG1_1111 | -2.1 |      | glutamine ABC transporter, periplasmic glutamine-binding protein        |
| HPAG1_0279 | -2.1 |      | ferredoxin                                                              |
| HPAG1_0176 | -2.1 |      | ABC transporter                                                         |
| HPAG1_1178 | -2.1 |      | hypothetical protein                                                    |
| HPAG1_0616 | -2.1 |      | quinone-reactive Ni/Fe hydrogenase HydC                                 |
| HPAG1_0880 | -2.1 |      | hydrogenase expression/formation protein HypB                           |
| HPAG1_0428 | -2.1 |      | protease DO                                                             |
| HPAG1_0280 | -2.1 |      | guanosine pentaphosphate phosphohydrolase                               |
| HPAG1_0970 | -2.2 |      | hypothetical protein                                                    |

|            |      |      |                                                           |
|------------|------|------|-----------------------------------------------------------|
| HPAG1_0107 | -2.2 |      | cysteine synthetase                                       |
| HPAG1_0001 | -2.2 | nusB | transcription antitermination protein NusB                |
| HPAG1_1002 | -2.2 |      | adhesin-thiol peroxidase                                  |
| HPAG1_0923 | -2.3 |      | amino acid ABC transporter, periplasmic binding protein   |
| HPAG1_1418 | -2.3 |      | transaldolase                                             |
| HPAG1_0312 | -2.3 |      | hypothetical protein                                      |
| HPAG1_0382 | -2.3 |      | hypothetical protein                                      |
| HPAG1_0614 | -2.4 |      | quinone-reactive Ni/Fe hydrogenase HydA                   |
| HPAG1_0085 | -2.4 | rplM | 50S ribosomal protein L13                                 |
| HPAG1_1329 | -2.4 |      | putative type III restriction enzyme R protein            |
| HPAG1_0569 | -2.5 | oorA | 2-oxoglutarate-acceptor oxidoreductase subunit OorA       |
| HPAG1_1169 | -2.5 |      | hypothetical protein                                      |
| HPAG1_0005 | -2.5 |      | orotidine 5'-phosphate decarboxylase                      |
| HPAG1_0207 | -2.6 |      | ATP-binding protein                                       |
| HPAG1_0625 | -2.6 |      | putative 3-hydroxyacid dehydrogenase                      |
| HPAG1_0750 | -2.6 |      | hypothetical protein                                      |
| HPAG1_1105 | -2.7 |      | glucose-6-phosphate isomerase                             |
| HPAG1_0708 | -2.7 |      | L-asparaginase II                                         |
| HPAG1_0544 | -2.8 |      | hypothetical protein                                      |
| HPAG1_0882 | -2.8 |      | hypothetical protein                                      |
| HPAG1_0101 | -2.8 |      | hypothetical protein                                      |
| HPAG1_0099 | -3.0 |      | methyl-accepting chemotaxis transmembrane sensory protein |
| HPAG1_1278 | -3.0 |      | hypothetical protein                                      |
| HPAG1_0830 | -3.1 |      | hydroxyethylthiazole kinase                               |
| HPAG1_0222 | -3.2 |      | cysteine desulfurase                                      |
| HPAG1_1009 | -3.3 |      | hypothetical protein                                      |
| HPAG1_0855 | -3.3 |      | alkylphosphonate uptake protein                           |
| HPAG1_0223 | -3.3 |      | nifU-like protein                                         |
| HPAG1_0487 | -3.4 |      | hypothetical protein                                      |
| HPAG1_1003 | -3.4 |      | iron-dependent superoxide dismutase                       |
| HPAG1_0230 | -3.4 |      | outer membrane protein HopM                               |
| HPAG1_0595 | -3.4 |      | hypothetical protein                                      |
| HPAG1_0751 | -3.5 |      | hypothetical protein                                      |
| HPAG1_0468 | -3.8 |      | neuraminylactose-binding hemagglutinin                    |
| HPAG1_0613 | -4.0 |      | modulator of drug activity                                |
| HPAG1_0198 | -4.0 |      | hypothetical protein                                      |
| HPAG1_0079 | -4.6 |      | reminiscent outer membrane protein HorA                   |



**Table S9. Genes in wild-type and isogenic  $\Delta$ hopZ strains whose expression *in vitro* is pH-dependent.**

**Table S9A. Wild-type, pH7 vs pH5 (fdr threshold 0.05)**

| HPAG1<br>GeneChip<br>probeset | fold-change | gene symbol | gene description                                 |
|-------------------------------|-------------|-------------|--------------------------------------------------|
| HPAG1_0859                    | 5.4         |             | iron-regulated outer membrane protein            |
| HPAG1_1531                    | 3.8         | pdxA        | 4-hydroxythreonine-4-phosphate dehydrogenase     |
| HPAG1_0259                    | 2.7         |             | hypothetical protein                             |
| HPAG1_0260                    | 2.4         |             | hypothetical protein                             |
| HPAG1_0258                    | 2.4         |             | hypothetical protein                             |
| HPAG1_0635                    | 2.4         |             | hypothetical protein                             |
| HPAG1_0046                    | 2.1         |             | adenine specific DNA methyltransferase           |
| HPAG1_0669                    | 2.1         |             | iron(III) dicitrate transport protein            |
| HPAG1_0257                    | 2.0         |             | adenylosuccinate synthetase                      |
| HPAG1_0783                    | 1.9         | moaC        | molybdenum cofactor biosynthesis protein C       |
| HPAG1_0647                    | 1.9         | rnc         | ribonuclease III                                 |
| HPAG1_0114                    | 1.9         |             | hypothetical protein                             |
| HPAG1_0786                    | 1.8         |             | molybdopterin converting factor, subunit 1       |
| HPAG1_0998                    | 1.7         |             | hypothetical protein                             |
| HPAG1_0371                    | 1.7         |             | hypothetical protein                             |
| HPAG1_0280                    | 1.7         |             | guanosine pentaphosphate phosphohydrolase        |
| HPAG1_0603                    | 1.6         |             | inorganic pyrophosphatase                        |
| HPAG1_1067                    | 1.6         |             | biopolymer transport protein                     |
| HPAG1_1306                    | 1.6         |             | hypothetical protein                             |
| HPAG1_1397                    | 1.6         |             | hypothetical protein                             |
| HPAG1_1305                    | 1.5         |             | hypothetical protein                             |
| HPAG1_1383                    | 1.5         | thyX        | FAD-dependent thymidylate synthase               |
| HPAG1_1314                    | 1.5         |             | adenine-specific DNA methylase                   |
| HPAG1_0718                    | 1.4         |             | hypothetical protein                             |
| HPAG1_0225                    | 1.4         |             | DNA repair protein RadA                          |
| HPAG1_0499                    | 1.4         |             | cag pathogenicity island protein 5               |
| HPAG1_0627                    | 1.4         |             | NAD(P)H-flavin oxidoreductase                    |
| HPAG1_1140                    | 1.4         | rplA        | 50S ribosomal protein L1                         |
| HPAG1_1535                    | 1.3         |             | hypothetical protein                             |
| HPAG1_0626                    | 1.3         |             | NAD(P)H-flavin oxidoreductase                    |
| HPAG1_0181                    | 1.3         |             | hypothetical protein                             |
| HPAG1_0995                    | 1.3         |             | D-3-phosphoglycerate dehydrogenase               |
| HPAG1_1124                    | -1.1        |             | hypothetical protein                             |
| HPAG1_0025                    | -1.2        |             | isocitrate dehydrogenase                         |
| HPAG1_0593                    | -1.3        |             | ABC transporter, ATP-binding protein             |
| HPAG1_1050                    | -1.3        |             | ferredoxin oxidoreductase beta subunit           |
| HPAG1_0011                    | -1.3        | groES       | co-chaperonin GroES                              |
| HPAG1_1226                    | -1.3        |             | putative transcriptional regulator               |
| HPAG1_1049                    | -1.3        | porA        | pyruvate flavodoxin oxidoreductase subunit alpha |
| HPAG1_0027                    | -1.4        |             | dethiobiotin synthetase                          |
| HPAG1_0831                    | -1.4        |             | type I restriction enzyme R protein              |
| HPAG1_0446                    | -1.5        |             | oligoendopeptidase F                             |
| HPAG1_0389                    | -1.5        | panB        | 3-methyl-2-oxobutanoate hydroxymethyltransferase |
| HPAG1_1017                    | -1.6        |             | hypothetical protein                             |

|            |      |      |                                            |
|------------|------|------|--------------------------------------------|
| HPAG1_1475 | -1.6 |      | outer membrane protein HorL                |
| HPAG1_0746 | -1.6 |      | hypothetical protein                       |
| HPAG1_0771 | -1.7 | lolA | outer-membrane lipoprotein carrier protein |
| HPAG1_0620 | -1.8 |      | hypothetical protein                       |
| HPAG1_0364 | -2.1 |      | outer membrane protein HofB                |
| HPAG1_1454 | -2.1 |      | cytochrome c551 peroxidase                 |
| HPAG1_1410 | -2.2 |      | hypothetical protein                       |
| HPAG1_0638 | -2.6 |      | nonheme iron-containing ferritin           |
| HPAG1_0617 | -2.6 |      | quinone-reactive Ni/Fe hydrogenase HydD    |
| HPAG1_0232 | -2.6 |      | outer membrane protein HopA                |
| HPAG1_0420 | -3.9 |      | ferric uptake regulation protein           |
| HPAG1_0110 | -4.2 |      | co-chaperone and heat shock protein 24     |
| HPAG1_1272 | -4.3 |      | hypothetical protein                       |
| HPAG1_0111 | -4.6 |      | heat-inducible transcription repressor     |
| HPAG1_0637 | -6.3 |      | phosphoserine phosphatase                  |

**Table S9B.  $\Delta$ hopZ, pH7 vs pH5 (fdr threshold 0.05)**

| HPAG1<br>GeneChip<br>probeset | fold-change | gene symbol | gene description                                        |
|-------------------------------|-------------|-------------|---------------------------------------------------------|
| HPAG1_0259                    | 2.7         |             | hypothetical protein                                    |
| HPAG1_0004                    | 2.3         |             | beta-carbonic anhydrase                                 |
| HPAG1_0787                    | 2.2         | ribA        | GTP cyclohydrolase II                                   |
| HPAG1_0978                    | 2.2         |             | cyclopropane fatty acid synthase                        |
| HPAG1_1296                    | 2.2         |             | hypothetical protein                                    |
| HPAG1_0107                    | 2.2         |             | cysteine synthetase                                     |
| HPAG1_0785                    | 2.1         |             | molybdopterin converting factor, subunit 2              |
| HPAG1_1279                    | 2.1         |             | hypothetical protein                                    |
| HPAG1_1311                    | 2.1         |             | putative histidine kinase sensor protein                |
| HPAG1_1303                    | 2.1         |             | quinolinate synthetase                                  |
| HPAG1_0693                    | 2.0         |             | hypothetical protein                                    |
| HPAG1_1399                    | 2.0         |             | selenocysteine synthase                                 |
| HPAG1_1227                    | 2.0         |             | hypothetical protein                                    |
| HPAG1_0864                    | 2.0         |             | hypothetical protein                                    |
| HPAG1_0293                    | 2.0         |             | hypothetical protein                                    |
| HPAG1_0294                    | 2.0         |             | hypothetical protein                                    |
| HPAG1_1294                    | 2.0         |             | uracil-DNA glycosylase                                  |
| HPAG1_0827                    | 2.0         |             | hypothetical protein                                    |
| HPAG1_0923                    | 2.0         |             | amino acid ABC transporter, periplasmic binding protein |
| HPAG1_1304                    | 2.0         |             | phosphatidylserine decarboxylase                        |
| HPAG1_0898                    | 2.0         |             | iron-regulated outer membrane protein                   |
| HPAG1_0280                    | 1.9         |             | guanosine pentaphosphate phosphohydrolase               |
| HPAG1_0123                    | 1.9         | infC        | translation initiation factor IF-3                      |
| HPAG1_0257                    | 1.9         |             | adenylosuccinate synthetase                             |
| HPAG1_0786                    | 1.9         |             | molybdopterin converting factor, subunit 1              |
| HPAG1_0329                    | 1.9         |             | CMP-N-acetylneuraminic acid synthetase                  |
| HPAG1_0922                    | 1.9         |             | amino acid ABC transporter, permease protein            |
| HPAG1_0048                    | 1.8         |             | type II DNA modification enzyme                         |
| HPAG1_0328                    | 1.8         | flgH        | flagellar basal body L-ring protein                     |
| HPAG1_0038                    | 1.8         |             | comB9 competence protein                                |
| HPAG1_0627                    | 1.8         |             | NAD(P)H-flavin oxidoreductase                           |

|            |     |      |                                                       |
|------------|-----|------|-------------------------------------------------------|
| HPAG1_1306 | 1.8 |      | hypothetical protein                                  |
| HPAG1_1109 | 1.7 |      | glutamine ABC transporter, permease protein           |
| HPAG1_0440 | 1.7 |      | type I restriction enzyme R protein                   |
| HPAG1_0222 | 1.7 |      | cysteine desulfurase                                  |
| HPAG1_1386 | 1.7 |      | purine nucleoside phosphorylase                       |
| HPAG1_0407 | 1.7 | rpsO | 30S ribosomal protein S15                             |
| HPAG1_0791 | 1.7 |      | hypothetical protein                                  |
| HPAG1_0279 | 1.7 |      | ferredoxin                                            |
| HPAG1_1517 | 1.6 |      | hypothetical protein                                  |
| HPAG1_0196 | 1.6 |      | 3-oxoacyl-(acyl carrier protein) synthase III         |
| HPAG1_1209 | 1.6 |      | NADH-ubiquinone oxidoreductase chain F                |
| HPAG1_0751 | 1.6 |      | hypothetical protein                                  |
| HPAG1_1355 | 1.6 |      | ATP/GTP binding protein                               |
| HPAG1_1516 | 1.6 |      | GTPase EngB                                           |
| HPAG1_1205 | 1.6 |      | NADH dehydrogenase subunit B                          |
| HPAG1_0094 | 1.5 |      | alpha-1,2-fucosyltransferase                          |
| HPAG1_1505 | 1.5 |      | cell division protein                                 |
| HPAG1_0777 | 1.5 |      | DNA transformation competence protein                 |
| HPAG1_0122 | 1.5 | thrS | threonyl-tRNA synthetase                              |
| HPAG1_0195 | 1.5 |      | putative glycerol-3-phosphate acyltransferase PlsX    |
| HPAG1_1532 | 1.5 |      | O-sialoglycoprotein endopeptidase                     |
| HPAG1_0049 | 1.5 |      | type II restriction enzyme                            |
| HPAG1_0106 | 1.5 |      | cystathionine gamma-synthase/cystathionine beta-lyase |
| HPAG1_0208 | 1.5 |      | lipopolysaccharide 1,2-glycosyltransferase            |
| HPAG1_0160 | 1.5 |      | delta-aminolevulinic acid dehydratase                 |
| HPAG1_1356 | 1.4 | ksgA | dimethyladenosine transferase                         |
| HPAG1_1206 | 1.4 |      | NADH dehydrogenase subunit C                          |
| HPAG1_1508 | 1.4 | flgB | flagellar basal body rod protein FlgB                 |
| HPAG1_1045 | 1.4 |      | hypothetical protein                                  |
| HPAG1_0384 | 1.4 | gidB | glucose-inhibited division protein B                  |
| HPAG1_0156 | 1.4 |      | hypothetical protein                                  |
| HPAG1_1504 | 1.4 | tsf  | elongation factor Ts                                  |
| HPAG1_1405 | 1.4 |      | hypothetical protein                                  |
| HPAG1_1118 | 1.4 |      | phosphopentomutase                                    |
| HPAG1_1384 | 1.4 |      | D-fructose-6-phosphate amidotransferase               |
| HPAG1_1318 | 1.4 |      | rod shape-determining protein                         |
| HPAG1_0778 | 1.4 | def  | peptide deformylase                                   |
| HPAG1_1063 | 1.4 |      | hypothetical protein                                  |
| HPAG1_1149 | 1.4 |      | type II adenine specific DNA methyltransferase        |
| HPAG1_1432 | 1.4 |      | hypothetical protein                                  |
| HPAG1_1523 | 1.4 |      | riboflavin synthase subunit alpha                     |
| HPAG1_1204 | 1.4 |      | NADH dehydrogenase subunit A                          |
| HPAG1_1263 | 1.4 | rplD | 50S ribosomal protein L4                              |
| HPAG1_0068 | 1.3 |      | urease accessory protein UreH                         |
| HPAG1_0237 | 1.3 |      | hypothetical protein                                  |
| HPAG1_0909 | 1.3 | folE | GTP cyclohydrolase I                                  |
| HPAG1_0159 | 1.3 |      | hypothetical protein                                  |
| HPAG1_1527 | 1.3 |      | hypothetical protein                                  |
| HPAG1_0868 | 1.3 |      | lipopolysaccharide 1,2-glycosyltransferase            |
| HPAG1_0003 | 1.3 |      | 2-dehydro-3-deoxyphosphooctonate aldolase             |
| HPAG1_0776 | 1.3 |      | cadmium-transporting ATPase                           |

|            |      |      |                                                           |
|------------|------|------|-----------------------------------------------------------|
| HPAG1_0069 | 1.3  |      | urease accessory protein UreG                             |
| HPAG1_0194 | 1.3  | rpmF | 50S ribosomal protein L32                                 |
| HPAG1_0040 | 1.3  |      | mannose-6-phosphate isomerase                             |
| HPAG1_0912 | 1.3  |      | hypothetical protein                                      |
| HPAG1_0087 | 1.2  |      | hypothetical protein                                      |
| HPAG1_0974 | 1.2  |      | hypothetical protein                                      |
| HPAG1_0995 | 1.2  |      | D-3-phosphoglycerate dehydrogenase                        |
| HPAG1_1075 | 1.2  |      | F0F1 ATP synthase subunit B'                              |
| HPAG1_1447 | 1.2  |      | branched-chain amino acid aminotransferase                |
| HPAG1_0006 | 1.1  | panC | pantoate--beta-alanine ligase                             |
| HPAG1_0549 | -1.2 |      | leucyl aminopeptidase                                     |
| HPAG1_0954 | -1.2 |      | hypothetical protein                                      |
| HPAG1_0025 | -1.2 |      | isocitrate dehydrogenase                                  |
| HPAG1_0496 | -1.2 |      | HP0521B-like protein                                      |
| HPAG1_0091 | -1.3 |      | acyl-carrier-protein S-malonyltransferase                 |
| HPAG1_0932 | -1.3 |      | hypothetical protein                                      |
| HPAG1_0703 | -1.3 |      | hypothetical protein                                      |
| HPAG1_0344 | -1.3 |      | CTP synthetase                                            |
| HPAG1_0702 | -1.3 |      | DNA polymerase III subunits gamma and tau                 |
| HPAG1_1184 | -1.3 |      | hypothetical protein                                      |
| HPAG1_0204 | -1.3 |      | hypothetical protein                                      |
| HPAG1_0113 | -1.3 |      | hypothetical protein                                      |
| HPAG1_1455 | -1.3 | dnaE | DNA polymerase III subunit alpha                          |
| HPAG1_1292 | -1.4 | pgk  | phosphoglycerate kinase                                   |
| HPAG1_0679 | -1.4 |      | putative outer membrane protein                           |
| HPAG1_0529 | -1.4 | rpmE | 50S ribosomal protein L31                                 |
| HPAG1_0324 | -1.4 | gmk  | guanylate kinase                                          |
| HPAG1_0816 | -1.4 | gatA | aspartyl/glutamyl-tRNA amidotransferase subunit A         |
| HPAG1_0842 | -1.4 |      | ADP-L-glycero-D-mannoheptose-6-epimerase                  |
| HPAG1_0445 | -1.4 |      | hypothetical protein                                      |
| HPAG1_0325 | -1.4 |      | poly E-rich protein                                       |
| HPAG1_0489 | -1.5 |      | ATP-dependent protease peptidase subunit                  |
| HPAG1_0019 | -1.5 |      | chemotaxis protein                                        |
| HPAG1_0674 | -1.5 |      | hypothetical protein                                      |
| HPAG1_0517 | -1.5 |      | cag pathogenicity island protein G                        |
| HPAG1_1178 | -1.5 |      | hypothetical protein                                      |
| HPAG1_1299 | -1.5 |      | hypothetical protein                                      |
| HPAG1_1457 | -1.5 |      | thioredoxin                                               |
| HPAG1_0092 | -1.5 |      | HrgA protein                                              |
| HPAG1_0680 | -1.5 |      | hydantoin utilization protein A                           |
| HPAG1_0453 | -1.6 | gltX | glutamyl-tRNA synthetase                                  |
| HPAG1_1164 | -1.6 |      | D-lactate dehydrogenase                                   |
| HPAG1_0709 | -1.6 |      | outer membrane protein SabA                               |
| HPAG1_1480 | -1.6 |      | hypothetical protein                                      |
| HPAG1_1278 | -1.6 |      | hypothetical protein                                      |
| HPAG1_0402 | -1.6 |      | acetyl-CoA synthetase                                     |
| HPAG1_1037 | -1.6 |      | 2-keto-3-deoxy-6-phosphogluconate aldolase                |
| HPAG1_0488 | -1.6 | rplI | 50S ribosomal protein L9                                  |
| HPAG1_0891 | -1.6 |      | hypothetical protein                                      |
| HPAG1_0266 | -1.7 |      | ATP-dependent protease binding subunit/heat shock protein |
| HPAG1_0813 | -1.7 |      | RNA binding protein                                       |

|            |      |      |                                                      |
|------------|------|------|------------------------------------------------------|
| HPAG1_0966 | -1.7 |      | hypothetical protein                                 |
| HPAG1_0212 | -1.7 |      | cysteine-rich protein A                              |
| HPAG1_0746 | -1.7 |      | hypothetical protein                                 |
| HPAG1_0215 | -1.8 |      | sodium-dependent transporter                         |
| HPAG1_1081 | -1.8 |      | hypothetical protein                                 |
| HPAG1_0131 | -1.8 |      | L-serine transporter                                 |
| HPAG1_0683 | -1.8 |      | hypothetical protein                                 |
| HPAG1_0771 | -1.8 | lolA | outer-membrane lipoprotein carrier protein           |
| HPAG1_0965 | -1.8 |      | hypothetical protein                                 |
| HPAG1_1475 | -1.8 |      | outer membrane protein HorL                          |
| HPAG1_0672 | -1.8 |      | putative type II cytosine specific methyltransferase |
| HPAG1_0963 | -1.9 |      | hypothetical protein                                 |
| HPAG1_1395 | -1.9 |      | type IIS restriction-modification protein            |
| HPAG1_0545 | -1.9 | dapF | diaminopimelate epimerase                            |
| HPAG1_0636 | -1.9 |      | alpha 1,3-fucosyltransferase                         |
| HPAG1_0639 | -2.0 |      | hypothetical protein                                 |
| HPAG1_0620 | -2.1 |      | hypothetical protein                                 |
| HPAG1_0873 | -2.1 |      | hypothetical protein                                 |
| HPAG1_0930 | -2.2 |      | hypothetical protein                                 |
| HPAG1_0874 | -2.3 |      | hypothetical protein                                 |
| HPAG1_0861 | -2.3 |      | hypothetical protein                                 |
| HPAG1_0617 | -2.3 |      | quinone-reactive Ni/Fe hydrogenase HydD              |
| HPAG1_0318 | -2.5 |      | hypothetical protein                                 |
| HPAG1_0615 | -2.6 |      | quinone-reactive Ni/Fe hydrogenase HydB              |
| HPAG1_0364 | -2.8 |      | outer membrane protein HofB                          |
| HPAG1_0319 | -2.8 |      | hypothetical protein                                 |
| HPAG1_1396 | -3.0 |      | hypothetical protein                                 |
| HPAG1_1116 | -3.1 |      | hypothetical protein                                 |
| HPAG1_0110 | -3.2 |      | co-chaperone and heat shock protein 24               |
| HPAG1_0638 | -3.3 |      | nonheme iron-containing ferritin                     |
| HPAG1_0111 | -3.4 |      | heat-inducible transcription repressor               |
| HPAG1_0448 | -3.6 |      | hypothetical protein                                 |
| HPAG1_0420 | -4.1 |      | ferric uptake regulation protein                     |
| HPAG1_0637 | -5.1 |      | phosphoserine phosphatase                            |
| HPAG1_1358 | -5.6 |      | hypothetical protein                                 |
| HPAG1_1271 | -6.3 |      | hypothetical protein                                 |

**Table S10. *H. pylori* HPAG1 genes whose expression *in vitro* is pH- and HopZ-dependent.**

| HPAG1<br>GeneChip<br>probeset | fold-change | gene symbol | gene description                                        |
|-------------------------------|-------------|-------------|---------------------------------------------------------|
| HPAG1_0004                    | 2.3         |             | beta-carbonic anhydrase                                 |
| HPAG1_0787                    | 2.2         | ribA        | GTP cyclohydrolase II                                   |
| HPAG1_0978                    | 2.2         |             | cyclopropane fatty acid synthase                        |
| HPAG1_1296                    | 2.2         |             | hypothetical protein                                    |
| HPAG1_0107                    | 2.2         |             | cysteine synthetase                                     |
| HPAG1_0785                    | 2.1         |             | molybdopterin converting factor, subunit 2              |
| HPAG1_1279                    | 2.1         |             | hypothetical protein                                    |
| HPAG1_1311                    | 2.1         |             | putative histidine kinase sensor protein                |
| HPAG1_1303                    | 2.1         |             | quinolinate synthetase                                  |
| HPAG1_0693                    | 2.0         |             | hypothetical protein                                    |
| HPAG1_1399                    | 2.0         |             | selenocysteine synthase                                 |
| HPAG1_1227                    | 2.0         |             | hypothetical protein                                    |
| HPAG1_0864                    | 2.0         |             | hypothetical protein                                    |
| HPAG1_0293                    | 2.0         |             | hypothetical protein                                    |
| HPAG1_0294                    | 2.0         |             | hypothetical protein                                    |
| HPAG1_1294                    | 2.0         |             | uracil-DNA glycosylase                                  |
| HPAG1_0827                    | 2.0         |             | hypothetical protein                                    |
| HPAG1_0923                    | 2.0         |             | amino acid ABC transporter, periplasmic binding protein |
| HPAG1_1304                    | 2.0         |             | phosphatidylserine decarboxylase                        |
| HPAG1_0898                    | 2.0         |             | iron-regulated outer membrane protein                   |
| HPAG1_0123                    | 1.9         | infC        | translation initiation factor IF-3                      |
| HPAG1_0329                    | 1.9         |             | CMP-N-acetylneuraminic acid synthetase                  |
| HPAG1_0922                    | 1.9         |             | amino acid ABC transporter, permease protein            |
| HPAG1_0048                    | 1.8         |             | type II DNA modification enzyme                         |
| HPAG1_0328                    | 1.8         | flgH        | flagellar basal body L-ring protein                     |
| HPAG1_0038                    | 1.8         |             | comB9 competence protein                                |
| HPAG1_1109                    | 1.7         |             | glutamine ABC transporter, permease protein             |
| HPAG1_0440                    | 1.7         |             | type I restriction enzyme R protein                     |
| HPAG1_0222                    | 1.7         |             | cysteine desulfurase                                    |
| HPAG1_1386                    | 1.7         |             | purine nucleoside phosphorylase                         |
| HPAG1_0407                    | 1.7         | rpsO        | 30S ribosomal protein S15                               |
| HPAG1_0791                    | 1.7         |             | hypothetical protein                                    |
| HPAG1_0279                    | 1.7         |             | ferredoxin                                              |
| HPAG1_1517                    | 1.6         |             | hypothetical protein                                    |
| HPAG1_0196                    | 1.6         |             | 3-oxoacyl-(acyl carrier protein) synthase III           |
| HPAG1_1209                    | 1.6         |             | NADH-ubiquinone oxidoreductase chain F                  |
| HPAG1_0751                    | 1.6         |             | hypothetical protein                                    |
| HPAG1_1355                    | 1.6         |             | ATP/GTP binding protein                                 |
| HPAG1_1516                    | 1.6         |             | GTPase EngB                                             |
| HPAG1_1205                    | 1.6         |             | NADH dehydrogenase subunit B                            |
| HPAG1_0094                    | 1.5         |             | alpha-1,2-fucosyltransferase                            |
| HPAG1_1505                    | 1.5         |             | cell division protein                                   |
| HPAG1_0777                    | 1.5         |             | DNA transformation competence protein                   |
| HPAG1_0122                    | 1.5         | thrS        | threonyl-tRNA synthetase                                |
| HPAG1_0195                    | 1.5         |             | putative glycerol-3-phosphate acyltransferase PlsX      |
| HPAG1_1532                    | 1.5         |             | O-sialoglycoprotein endopeptidase                       |
| HPAG1_0049                    | 1.5         |             | type II restriction enzyme                              |
| HPAG1_0106                    | 1.5         |             | cystathionine gamma-synthase/cystathionine beta-lyase   |
| HPAG1_0208                    | 1.5         |             | lipopolysaccharide 1,2-glycosyltransferase              |
| HPAG1_0160                    | 1.5         |             | delta-aminolevulinic acid dehydratase                   |

|            |      |      |                                                   |
|------------|------|------|---------------------------------------------------|
| HPAG1_1356 | 1.4  | ksgA | dimethyladenosine transferase                     |
| HPAG1_1206 | 1.4  |      | NADH dehydrogenase subunit C                      |
| HPAG1_1508 | 1.4  | flgB | flagellar basal body rod protein FlgB             |
| HPAG1_1045 | 1.4  |      | hypothetical protein                              |
| HPAG1_0384 | 1.4  | gidB | glucose-inhibited division protein B              |
| HPAG1_0156 | 1.4  |      | hypothetical protein                              |
| HPAG1_1504 | 1.4  | tsf  | elongation factor Ts                              |
| HPAG1_1405 | 1.4  |      | hypothetical protein                              |
| HPAG1_1118 | 1.4  |      | phosphopentomutase                                |
| HPAG1_1384 | 1.4  |      | D-fructose-6-phosphate amidotransferase           |
| HPAG1_1318 | 1.4  |      | rod shape-determining protein                     |
| HPAG1_0778 | 1.4  | def  | peptide deformylase                               |
| HPAG1_1063 | 1.4  |      | hypothetical protein                              |
| HPAG1_1149 | 1.4  |      | type II adenine specific DNA methyltransferase    |
| HPAG1_1432 | 1.4  |      | hypothetical protein                              |
| HPAG1_1523 | 1.4  |      | riboflavin synthase subunit alpha                 |
| HPAG1_1204 | 1.4  |      | NADH dehydrogenase subunit A                      |
| HPAG1_1263 | 1.4  | rplD | 50S ribosomal protein L4                          |
| HPAG1_0068 | 1.3  |      | urease accessory protein UreH                     |
| HPAG1_0237 | 1.3  |      | hypothetical protein                              |
| HPAG1_0909 | 1.3  | folE | GTP cyclohydrolase I                              |
| HPAG1_0159 | 1.3  |      | hypothetical protein                              |
| HPAG1_1527 | 1.3  |      | hypothetical protein                              |
| HPAG1_0868 | 1.3  |      | lipopolysaccharide 1,2-glycosyltransferase        |
| HPAG1_0003 | 1.3  |      | 2-dehydro-3-deoxyphosphooctonate aldolase         |
| HPAG1_0776 | 1.3  |      | cadmium-transporting ATPase                       |
| HPAG1_0069 | 1.3  |      | urease accessory protein UreG                     |
| HPAG1_0194 | 1.3  | rpmF | 50S ribosomal protein L32                         |
| HPAG1_0040 | 1.3  |      | mannose-6-phosphate isomerase                     |
| HPAG1_0912 | 1.3  |      | hypothetical protein                              |
| HPAG1_0087 | 1.2  |      | hypothetical protein                              |
| HPAG1_0974 | 1.2  |      | hypothetical protein                              |
| HPAG1_1075 | 1.2  |      | F0F1 ATP synthase subunit B'                      |
| HPAG1_1447 | 1.2  |      | branched-chain amino acid aminotransferase        |
| HPAG1_0006 | 1.1  | panC | pantoate--beta-alanine ligase                     |
| HPAG1_0549 | -1.2 |      | leucyl aminopeptidase                             |
| HPAG1_0954 | -1.2 |      | hypothetical protein                              |
| HPAG1_0496 | -1.2 |      | HP0521B-like protein                              |
| HPAG1_0091 | -1.3 |      | acyl-carrier-protein S-malonyltransferase         |
| HPAG1_0932 | -1.3 |      | hypothetical protein                              |
| HPAG1_0703 | -1.3 |      | hypothetical protein                              |
| HPAG1_0344 | -1.3 |      | CTP synthetase                                    |
| HPAG1_0702 | -1.3 |      | DNA polymerase III subunits gamma and tau         |
| HPAG1_1184 | -1.3 |      | hypothetical protein                              |
| HPAG1_0204 | -1.3 |      | hypothetical protein                              |
| HPAG1_0113 | -1.3 |      | hypothetical protein                              |
| HPAG1_1455 | -1.3 | dnaE | DNA polymerase III subunit alpha                  |
| HPAG1_1292 | -1.4 | pgk  | phosphoglycerate kinase                           |
| HPAG1_0679 | -1.4 |      | putative outer membrane protein                   |
| HPAG1_0529 | -1.4 | rpmE | 50S ribosomal protein L31                         |
| HPAG1_0324 | -1.4 | gmk  | guanylate kinase                                  |
| HPAG1_0816 | -1.4 | gatA | aspartyl/glutamyl-tRNA amidotransferase subunit A |
| HPAG1_0842 | -1.4 |      | ADP-L-glycero-D-mannoheptose-6-epimerase          |
| HPAG1_0445 | -1.4 |      | hypothetical protein                              |
| HPAG1_0325 | -1.4 |      | poly E-rich protein                               |
| HPAG1_0489 | -1.5 |      | ATP-dependent protease peptidase subunit          |

|            |      |      |                                                           |
|------------|------|------|-----------------------------------------------------------|
| HPAG1_0019 | -1.5 |      | chemotaxis protein                                        |
| HPAG1_0674 | -1.5 |      | hypothetical protein                                      |
| HP0710_at  | -1.5 |      |                                                           |
| HPAG1_0517 | -1.5 |      | cag pathogenicity island protein G                        |
| HPAG1_1178 | -1.5 |      | hypothetical protein                                      |
| HPAG1_1299 | -1.5 |      | hypothetical protein                                      |
| HPAG1_1457 | -1.5 |      | thioredoxin                                               |
| HPAG1_0092 | -1.5 |      | HrgA protein                                              |
| HPAG1_0680 | -1.5 |      | hydantoin utilization protein A                           |
| HPAG1_0453 | -1.6 | gltX | glutamyl-tRNA synthetase                                  |
| HPAG1_1164 | -1.6 |      | D-lactate dehydrogenase                                   |
| HPAG1_0709 | -1.6 |      | outer membrane protein SabA                               |
| HPAG1_1480 | -1.6 |      | hypothetical protein                                      |
| HPAG1_1278 | -1.6 |      | hypothetical protein                                      |
| HPAG1_0402 | -1.6 |      | acetyl-CoA synthetase                                     |
| HPAG1_1037 | -1.6 |      | 2-keto-3-deoxy-6-phosphogluconate aldolase                |
| HPAG1_0488 | -1.6 | rplI | 50S ribosomal protein L9                                  |
| HPAG1_0891 | -1.6 |      | hypothetical protein                                      |
| HPAG1_0266 | -1.7 |      | ATP-dependent protease binding subunit/heat shock protein |
| HPAG1_0813 | -1.7 |      | RNA binding protein                                       |
| HPAG1_0966 | -1.7 |      | hypothetical protein                                      |
| HPAG1_0212 | -1.7 |      | cysteine-rich protein A                                   |
| HPAG1_0215 | -1.8 |      | sodium-dependent transporter                              |
| HPAG1_1081 | -1.8 |      | hypothetical protein                                      |
| HPAG1_0131 | -1.8 |      | L-serine transporter                                      |
| HPAG1_0683 | -1.8 |      | hypothetical protein                                      |
| HPAG1_0965 | -1.8 |      | hypothetical protein                                      |
| HPAG1_0672 | -1.8 |      | putative type II cytosine specific methyltransferase      |
| HPAG1_0963 | -1.9 |      | hypothetical protein                                      |
| HPAG1_1395 | -1.9 |      | type IIS restriction-modification protein                 |
| HPAG1_0545 | -1.9 | dapF | diaminopimelate epimerase                                 |
| HPAG1_0636 | -1.9 |      | alpha 1,3-fucosyltransferase                              |
| HPAG1_0639 | -2.0 |      | hypothetical protein                                      |
| HPAG1_0873 | -2.1 |      | hypothetical protein                                      |
| HPAG1_0930 | -2.2 |      | hypothetical protein                                      |
| HPAG1_0874 | -2.3 |      | hypothetical protein                                      |
| HPAG1_0861 | -2.3 |      | hypothetical protein                                      |
| HPAG1_0318 | -2.5 |      | hypothetical protein                                      |
| HPAG1_0615 | -2.6 |      | quinone-reactive Ni/Fe hydrogenase HydB                   |
| HPAG1_0319 | -2.8 |      | hypothetical protein                                      |
| HPAG1_1396 | -3.0 |      | hypothetical protein                                      |
| HPAG1_1116 | -3.1 |      | hypothetical protein                                      |
| HPAG1_0448 | -3.6 |      | hypothetical protein                                      |
| HPAG1_1358 | -5.6 |      | hypothetical protein                                      |
| HPAG1_1271 | -6.3 |      | hypothetical protein                                      |

Genes that are down- or up-regulated in the  $\Delta$ *hopZ* compared to wild-type strain at pH 7.0 versus pH 5.0 are shown.



Table S11. PAML analysis of positive selection in *H. pylori* genes.

|                             | Gene       | Systematic                                                  | Annotation                                               | Recombination | Aligned nt | M1 lnL    | M2 lnL    | LRT  | $\omega$ | p    |
|-----------------------------|------------|-------------------------------------------------------------|----------------------------------------------------------|---------------|------------|-----------|-----------|------|----------|------|
| Outer membrane proteins     | hopA       | HPAG1_0232                                                  | HopA                                                     | N             | 720        | -2757.90  | -2740.20  | 0.00 | 3.67     | 0.07 |
|                             | hopP       | HPAG1_0709                                                  | SabA                                                     | N             | 354        | -1244.14  | -1233.01  | 0.00 | 4.33     | 0.12 |
|                             |            |                                                             |                                                          |               | 606        | -2496.87  | -2491.33  | 0.00 | 4.52     | 0.04 |
|                             | hopZ       | HPAG1_0009                                                  | HopZ                                                     | Y             | 288        | -811.87   | -804.38   | 0.00 | 4.99     | 0.11 |
|                             |            |                                                             |                                                          | 294           | -642.01    | -642.01   | 1.00      |      |          |      |
| Housekeeping functions      | atpA       | HPAG1_1072                                                  | ATP synthase F1, subunit alpha                           | Y             | 501        | -1097.04  | -1095.56  | 0.23 |          |      |
|                             |            |                                                             |                                                          |               | 48         | -64.52    | -64.52    | 1.00 |          |      |
|                             |            |                                                             |                                                          |               | 558        | -1109.56  | -1108.74  | 0.44 |          |      |
|                             |            |                                                             |                                                          |               | 399        | -692.82   | -692.85   | 1.00 |          |      |
|                             | efp        | HPAG1_0173                                                  | translation elongation factor EF-P                       | N             | 561        | -1128.24  | -1123.36  | 0.01 | 12.25    | 0.01 |
|                             | mutY       | HPAG1_0140                                                  | A/G-specific adenine glycosylase                         | Y             | 984        | -2949.29  | -2939.56  | 0.00 | 12.49    | 0.00 |
|                             | ppa        | HPAG1_0603                                                  | inorganic pyrophosphatase                                | N             | 519        | -1061.02  | -1060.80  | 0.81 |          |      |
| trpC                        | HPAG1_1233 | N-(5'-phospho- ribosyl)anthranilate isomerase               | N                                                        | 1203          | -3625.18   | -3610.99  | 0.00      | 5.08 | 0.02     |      |
| ureI                        | HPAG1_0072 | urease accessory protein/pH-dependent urea-transporter UreI | N                                                        | 585           | -1284.02   | -1284.02  | 1.00      |      |          |      |
| Known virulence factors     | cagA       | HPAG1_0524                                                  | cytotoxin-associated protein A                           | N             | 2100       | -5846.60  | -5790.89  | 0.00 | 5.97     | 0.08 |
|                             | vacA       | HPAG1_0867                                                  | vacuolating cytotoxin A                                  | N             | 3513       | -11777.11 | -11736.18 | 0.00 | 4.39     | 0.03 |
| Randomly chosen HPAG1 genes | --         | HPAG1_0101                                                  | hypothetical protein                                     | N             | 753        | -2129.87  | -2125.87  | 0.02 | 4.66     | 0.01 |
|                             | infC       | HPAG1_0123                                                  | translation initiation factor IF-3                       | N             | 609        | -1275.22  | -1273.36  | 0.16 |          |      |
|                             |            |                                                             |                                                          |               | 219        | -417.44   | -417.44   | 1.00 |          |      |
|                             | ftsH       | HPAG1_0288                                                  | cell division protein                                    | Y             | 399        | -955.29   | -954.83   | 0.63 |          |      |
|                             |            |                                                             |                                                          |               | 258        | -758.64   | -758.12   | 0.59 |          |      |
|                             | --         | HPAG1_0311                                                  | putative N-carbamoyl-D-amino acid amidohydrolase         | N             | 540        | -1538.01  | -1537.70  | 0.74 |          |      |
|                             | gmk        | HPAG1_0324                                                  | 5'-guanylate kinase                                      | N             | 483        | -863.95   | -863.90   | 0.96 |          |      |
|                             | --         | HPAG1_0455                                                  | type II adenine specific methyltransferase               | N             | 708        | -1817.71  | -1810.87  | 0.00 | 8.64     | 0.01 |
|                             |            |                                                             |                                                          |               | 96         | -161.10   | -161.07   | 0.97 |          |      |
|                             |            |                                                             |                                                          |               | 153        | -338.08   | -338.04   | 0.96 |          |      |
|                             |            |                                                             |                                                          |               | 180        | -361.96   | -361.96   | 1.00 |          |      |
|                             | --         | HPAG1_0480                                                  | putative outer membrane protein                          | Y             | 99         | -184.08   | -183.96   | 0.88 |          |      |
|                             |            |                                                             |                                                          |               | 33         | -46.92    | -46.92    | 1.00 |          |      |
|                             |            |                                                             |                                                          |               | 117        | -314.26   | -314.26   | 1.00 |          |      |
|                             |            |                                                             |                                                          |               | 147        | -363.22   | -363.20   | 0.98 |          |      |
|                             | flaG       | HPAG1_0736                                                  | putative polar flagellin                                 | N             | 357        | -887.66   | -887.56   | 0.90 |          |      |
|                             | fecE       | HPAG1_0869                                                  | iron(III) dicitrate ABC transporter, ATP-binding protein | N             | 765        | -1665.08  | -1665.08  | 1.00 |          |      |
|                             | htpX       | HPAG1_0908                                                  | heat shock protein                                       | N             | 390        | -930.19   | -921.40   | 0.00 | 8.20     | 0.02 |
|                             | --         | HPAG1_0958                                                  | peptidyl-prolyl cis-trans isomerase D                    | N             | 504        | -1194.66  | -1192.40  | 0.10 |          |      |
|                             | rpsA       | HPAG1_0993                                                  | ribosomal protein S1                                     | N             | 1596       | -3617.91  | -3616.28  | 0.20 |          |      |
|                             |            |                                                             |                                                          |               | 87         | -279.54   | -273.15   | 0.00 | 6.98     | 0.17 |
|                             | --         | HPAG1_1018                                                  | hypothetical protein                                     | Y             | 105        | -261.10   | -261.10   | 1.00 |          |      |
|                             |            |                                                             |                                                          |               | 210        | -697.30   | -694.14   | 0.04 | 2.13     | 0.21 |
|                             | --         | HPAG1_1227                                                  | conserved hypothetical secreted protein                  | Y             | 531        | -1449.55  | -1449.25  | 0.74 |          |      |
|                             |            |                                                             |                                                          |               | 18         | -29.53    | -29.53    | 1.00 |          |      |
|                             | lpxA       | HPAG1_1321                                                  | UDP-N-acetylglucosamine acyltransferase                  | Y             | 180        | -352.35   | -352.35   | 1.00 |          |      |
|                             |            |                                                             |                                                          |               | 300        | -670.68   | -670.22   | 0.63 |          |      |
|                             |            |                                                             |                                                          | 156           | -302.39    | -302.39   | 1.00      |      |          |      |
| exbD                        | HPAG1_1372 | biopolymer transport protein                                | Y                                                        | 48            | -89.38     | -89.38    | 1.00      |      |          |      |
|                             |            |                                                             |                                                          | 105           | -180.55    | -180.55   | 1.00      |      |          |      |
|                             |            |                                                             |                                                          | 90            | -162.99    | -162.99   | 1.00      |      |          |      |
| --                          | HPAG1_1402 | dihydroneopterin aldolase                                   | N                                                        | 351           | -1065.81   | -1060.09  | 0.00      | 4.00 | 0.11     |      |
|                             |            |                                                             |                                                          | 72            | -129.45    | -129.06   | 0.67      |      |          |      |
| --                          | HPAG1_1427 | hypothetical protein                                        | Y                                                        | 312           | -840.02    | -839.71   | 0.73      |      |          |      |
|                             |            |                                                             |                                                          | 195           | -534.33    | -532.32   | 0.13      |      |          |      |
| --                          | HPAG1_1476 | inorganic polyphosphate/ATP-NAD kinase                      | N                                                        | 543           | -1494.11   | -1493.82  | 0.75      |      |          |      |
| secF                        | HPAG1_1498 | protein-export membrane protein                             | N                                                        | 537           | -1252.63   | -1252.62  | 0.98      |      |          |      |

Genes are divided into four categories: (i) specific outer membrane proteins of interest, (ii) housekeeping genes, (iii) known virulence factors, and (iv) randomly chosen HPAG1 genes. The trivial gene name, HPAG1 systematic gene name, and HPAG1 annotation are given. Genes that had evidence for recombination ( $p < 0.05$  according to GENECONV) were analyzed as fragments; resulting in multiple rows for several genes, which are shown in order from the 5' fragment to the 3' fragment. The amount of aligned sequence is shown for each ortholog set or fragment set. M1 lnL and M2 lnL are the logarithm (base e) of the likelihood reported by PAML for the respective evolutionary model. LRT is the likelihood ratio test p-value, indicating the amount of statistical support for rejecting the null hypothesis (of no positive selection).  $\omega$  is the dn/ds value and p is the proportion of codons under positive selection for those genes that had significant evidence of positive selection. Genes with significant evidence of positive selection are highlighted in bold type.
